# Supplementary material
Source: publisher figshare collection journal article supplement (https://acs.figshare.com/ndownloader/files/8489057)
Supplement: Supplementary file 1 [file 8489057]

**The Consequences of Overlapping G-Quadruplexes and i-Motifs in the Platelet-Derived Growth Factor Receptor  $\beta$  Core Promoter Nuclease Hypersensitive Element Can Explain the Unexpected Effects of Mutations and Provide Opportunities for Selective Targeting of Both Structures by Small Molecules to Downregulate Gene Expression**

Robert V. Brown, Ting Wang, Venkateshwar Reddy Chappeta, Guanhui Wu, Buket Onel, Reena Chawla, Hector Quijada, Sara M. Camp, Eddie T. Chiang, Quinea R. Lassiter, Carmen Lee, Shivani Phanse, Megan A. Turnidge, Ping Zhou, Joe G. N. Garcia, Vijay Gokhale, Danzhou Yang, Laurence H. Hurley

**A**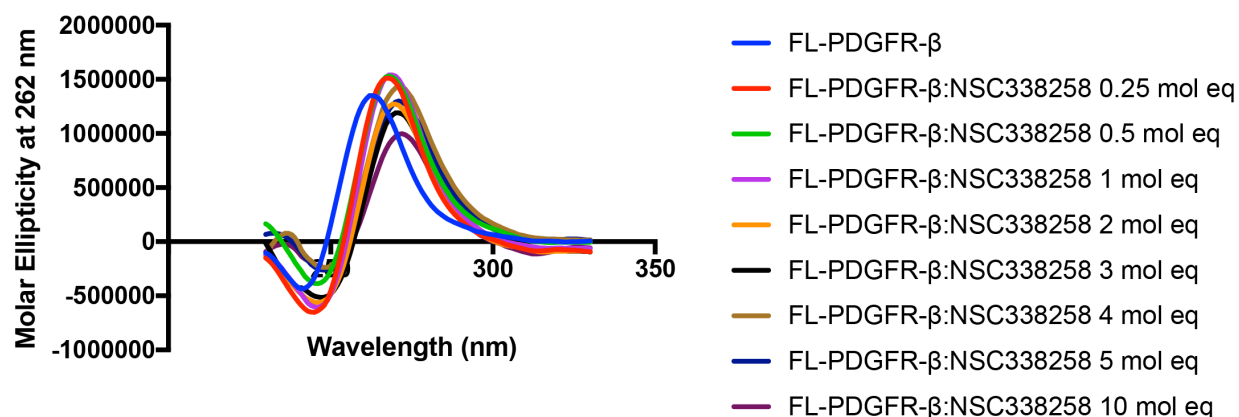**B**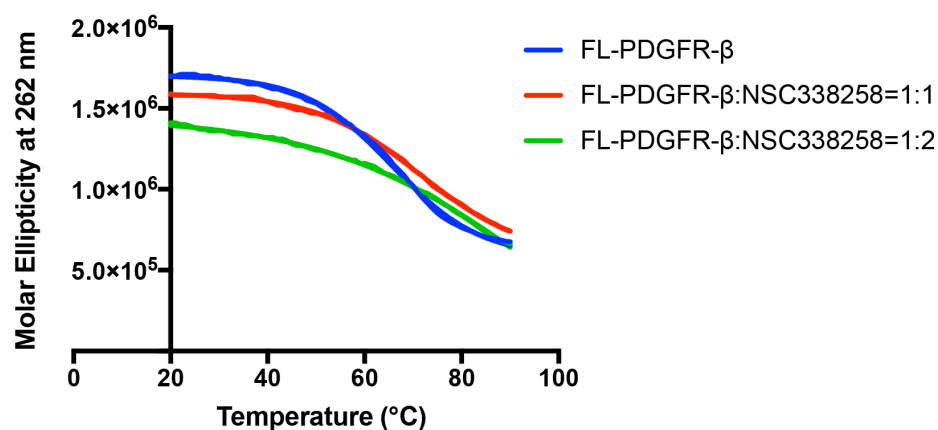

|              | FL-PDGFR-β:NSC338258 | FL-PDGFR-β:NSC338258<br>1 mol. equiv. | FL-PDGFR-β:NSC338258<br>2 mol. equiv. |
|--------------|----------------------|---------------------------------------|---------------------------------------|
| $T_m$ (°C)   | 75                   | 86                                    | 86                                    |
| $\Delta T_m$ | —                    | 11                                    | 11                                    |

**Figure S1.** (A) CD of the titration of the FL 41 mer with NSC338258 and (B) increase in the thermal stability of the WT 41-mer (red and green) relative to the no drug control (WT, green). NSC338258 stabilizes the WT 41-mer by 11 °C.

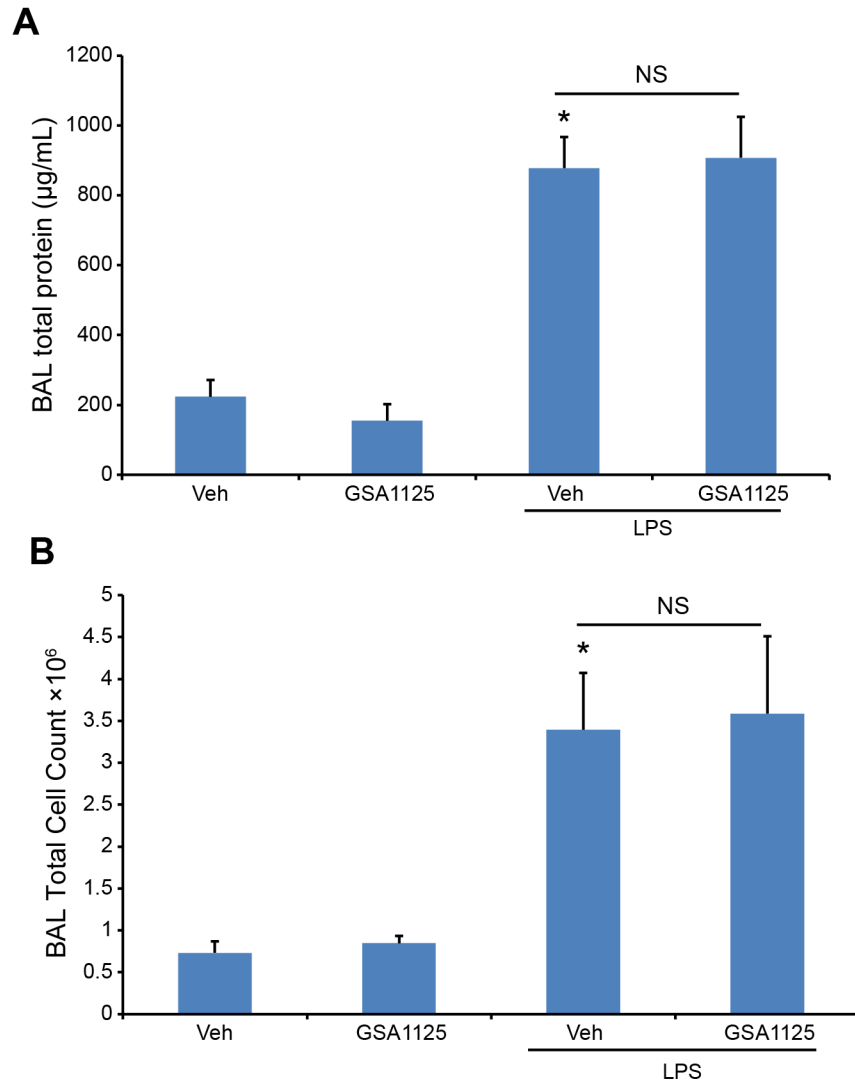

**Figure S2.** GSA1125 does not protect against LPS-induced lung injury. C57/B6 mice were challenged with an intratracheal administration of LPS solution (1.0 mg/kg) and GSA1125 (10 mg/kg) simultaneously. The animals were allowed to recover for 18 h, and BAL fluids were extracted for analysis. (A) BAL total protein. (B) BAL total cell counts were elevated by LPS challenge, but not affected by GSA1125 treatment. \*,  $p < 0.05$  compared to vehicle control. NS, not statistically significant.

Current Data Parameters  
 NAME VB-GSA-02115-final  
 EXPNO 6  
 PROCNO 1

F2 - Acquisition Parameters  
 Date\_ 20110111  
 Time 10.34  
 INSTRUM spect  
 PROBHD 5 mm QNP 1H/1  
 PULPROG zg30  
 TD 65536  
 SOLVENT DMSO  
 NS 64  
 DS 2  
 SWH 6172.839 Hz  
 FIDRES 0.094190 Hz  
 AQ 5.3084660 sec  
 RG 406.4  
 DW 81.000 usec  
 DE 6.00 usec  
 TE 300.0 K  
 D1 1.00000000 sec

===== CHANNEL f1 =====  
 NUC1 1H  
 P1 8.50 usec  
 PL1 0.00 dB  
 SFO1 300.1318534 MHz  
 F2 - Processing parameters  
 SI 32768  
 SF 300.1300000 MHz  
 WDW EM  
 SSB 0  
 LB 0.30 Hz  
 GB 0  
 PC 1.00

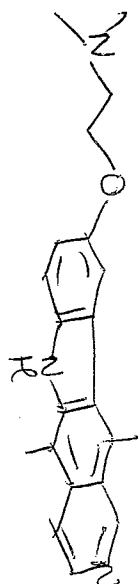

VB-GSA-02115

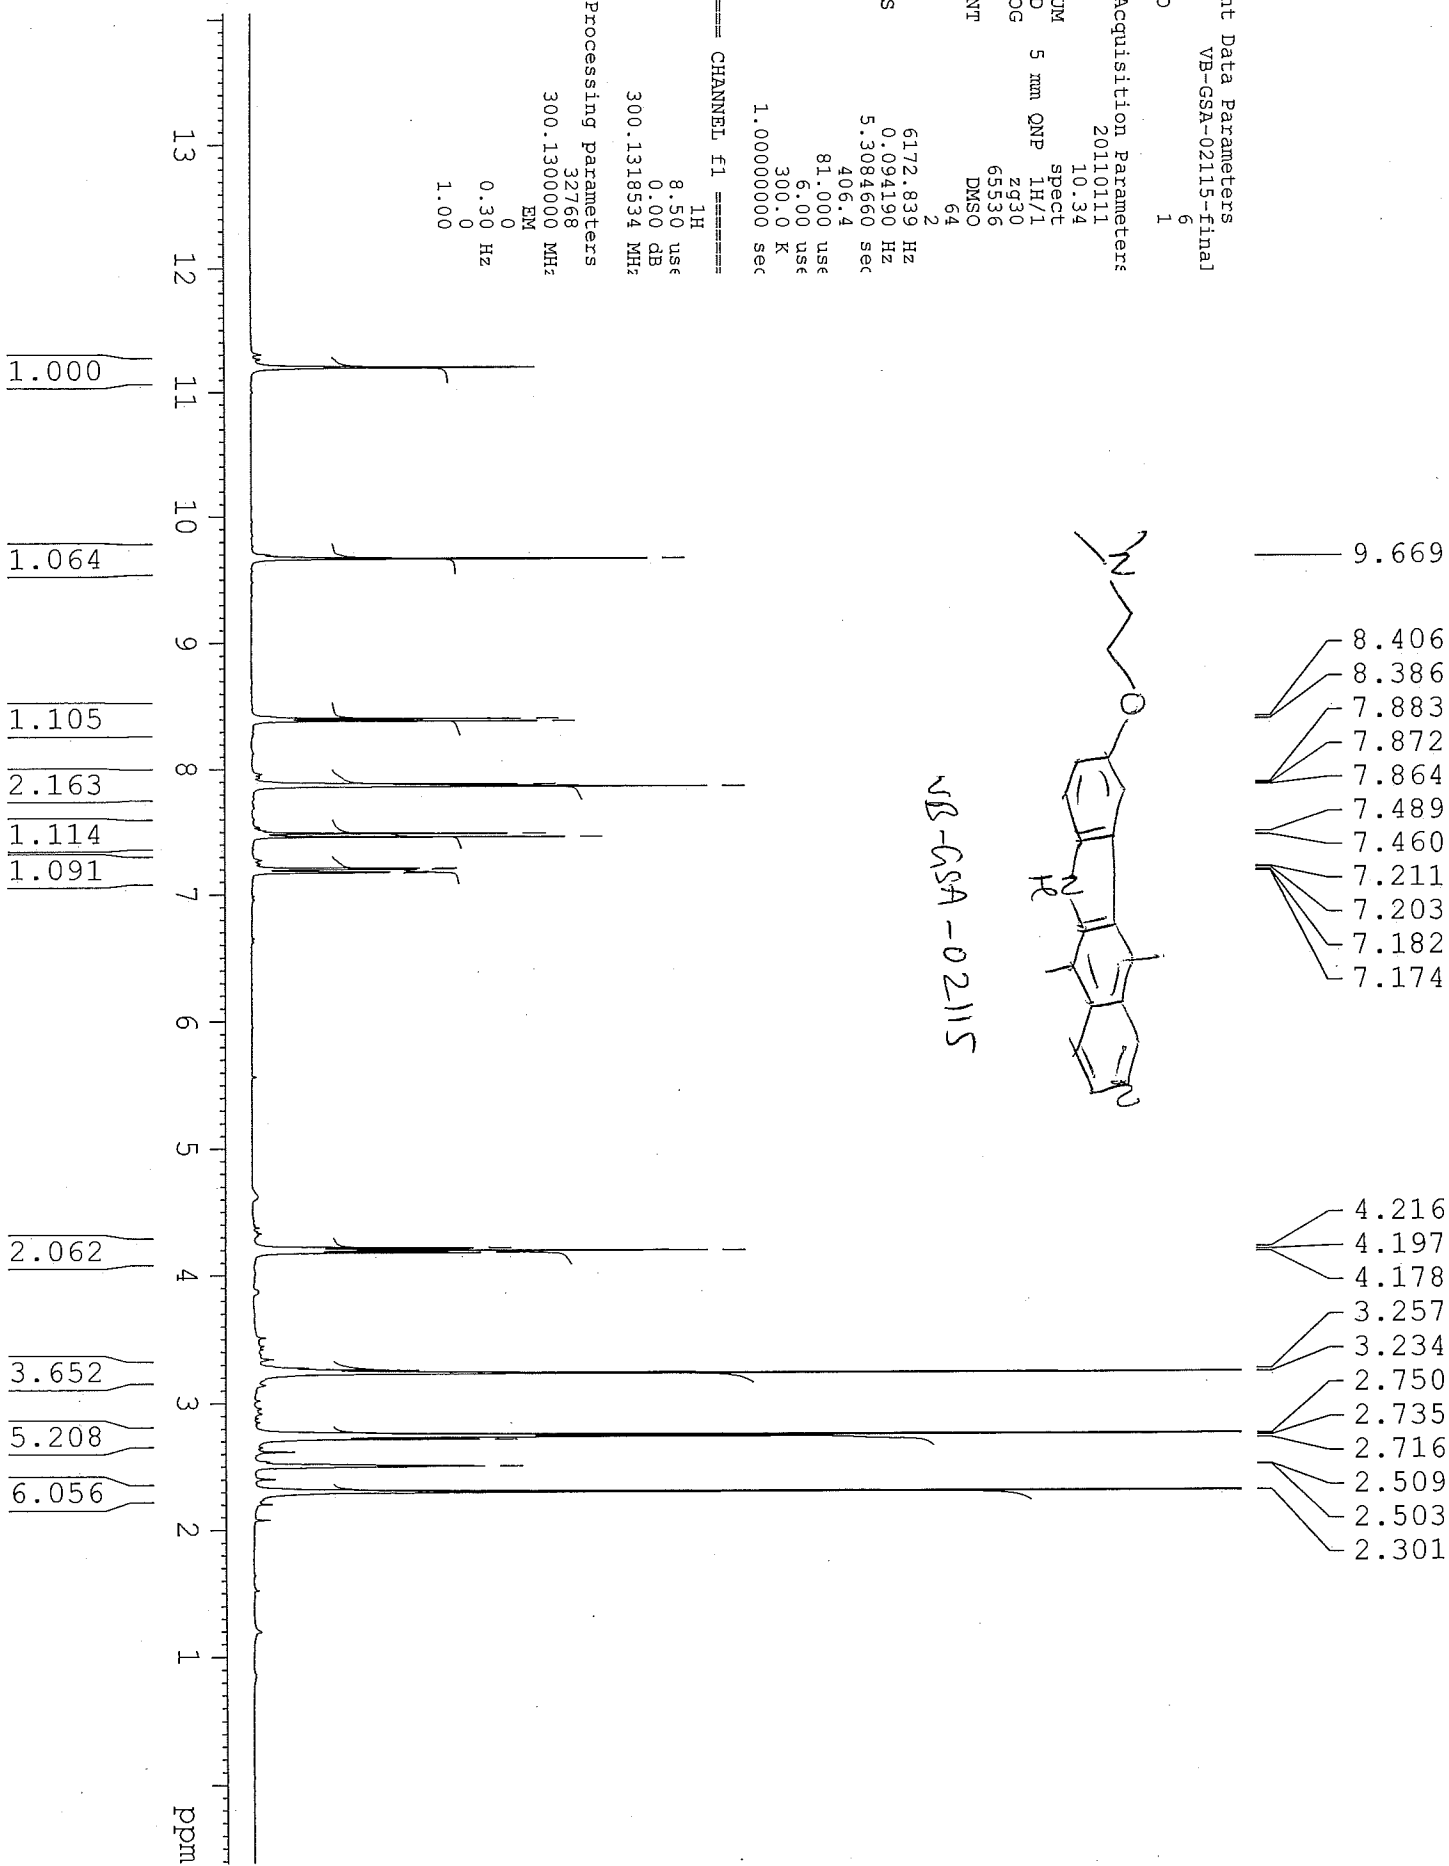

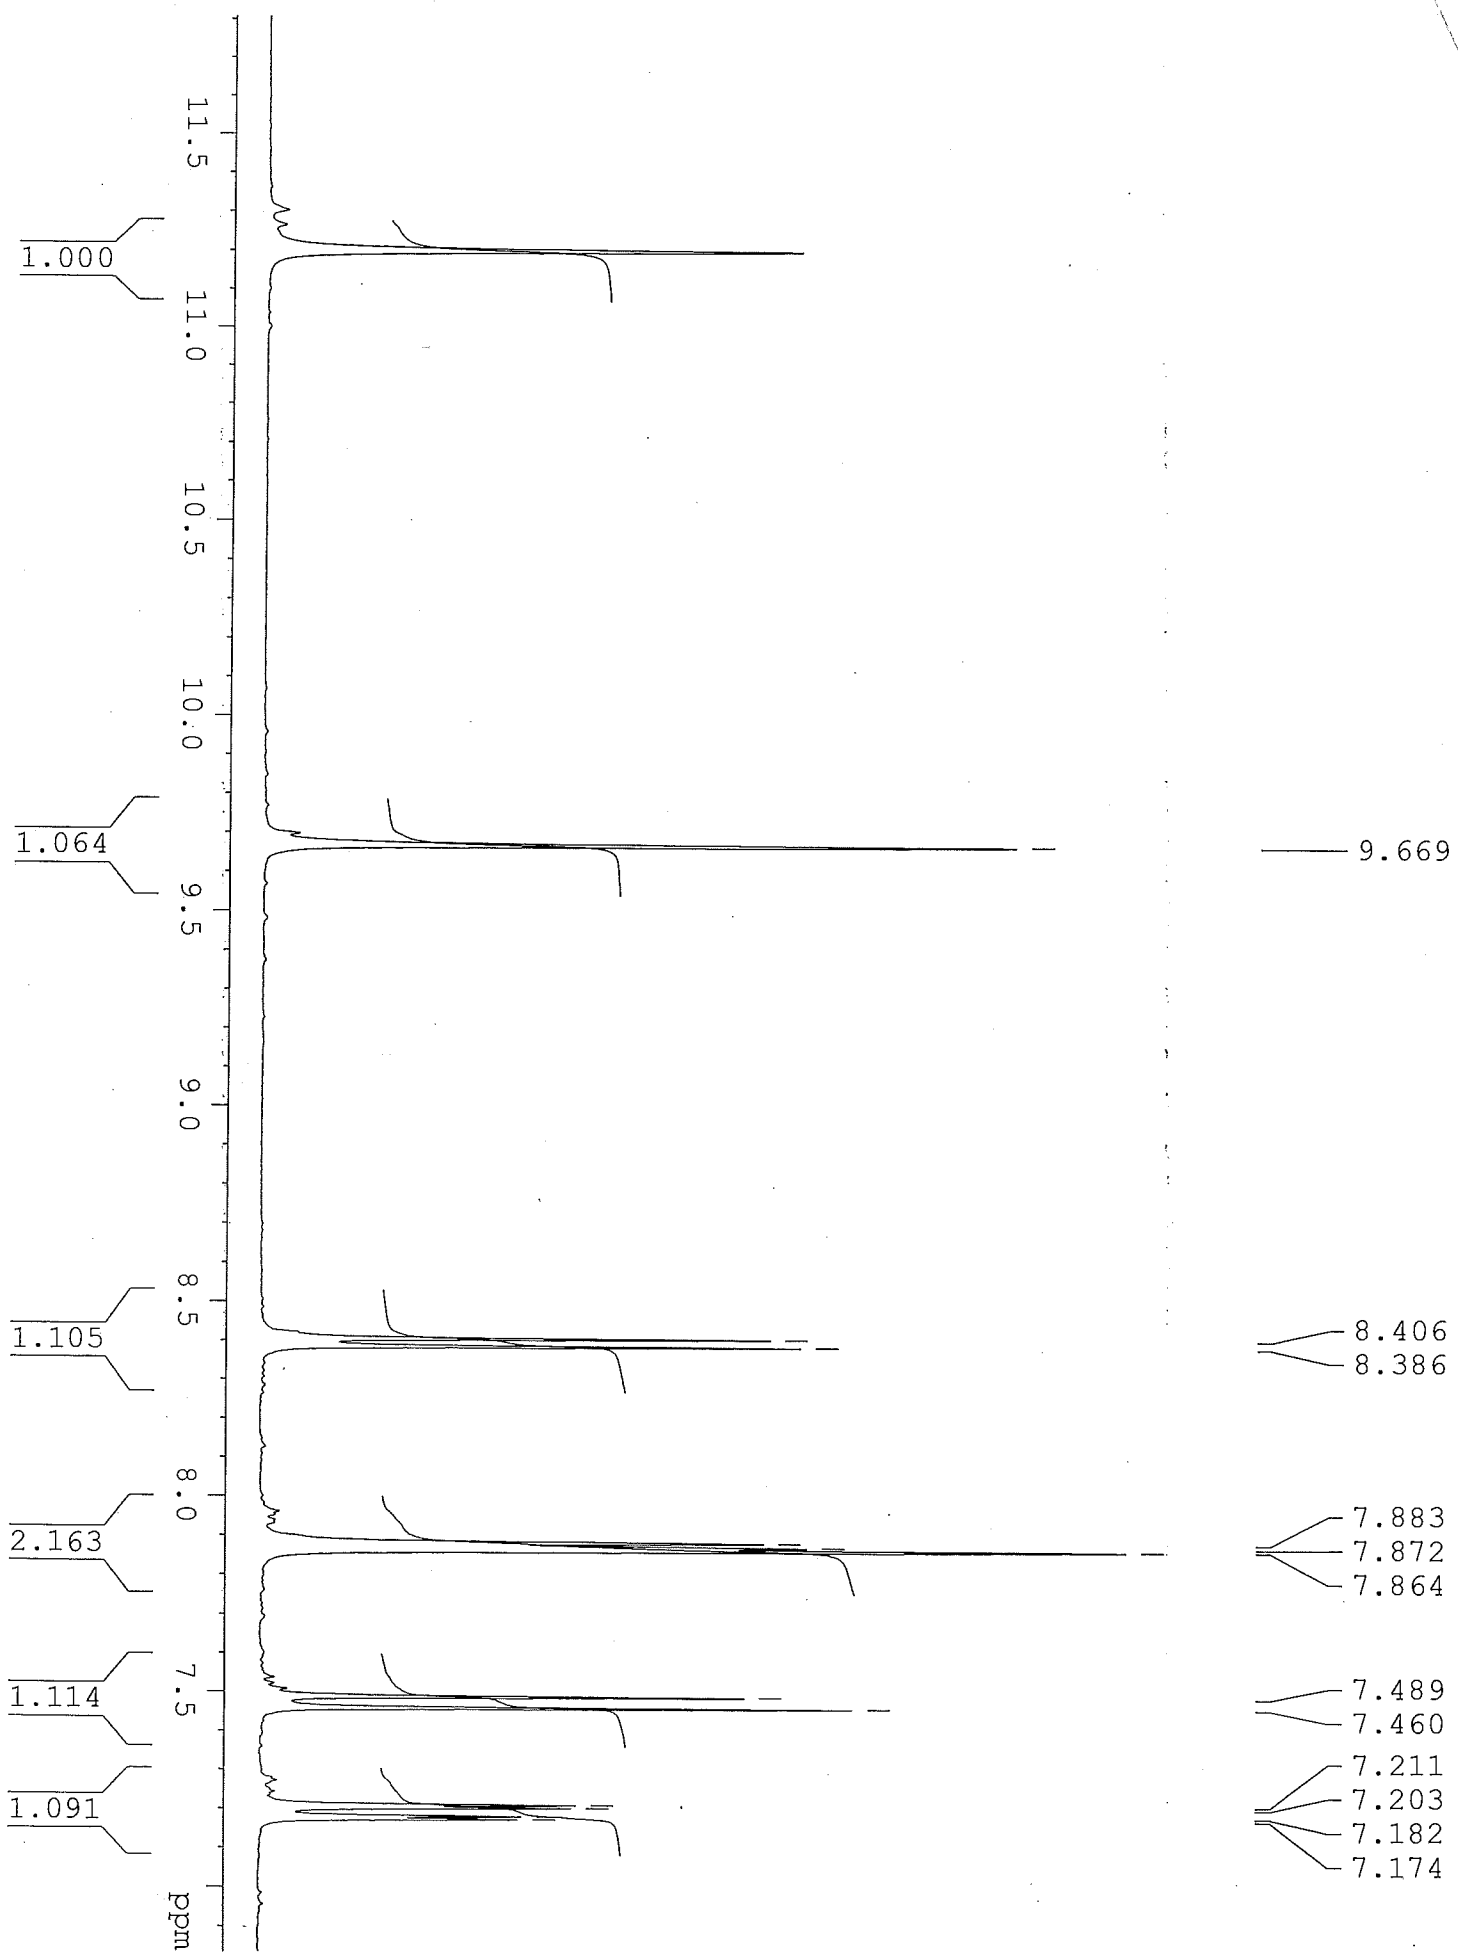

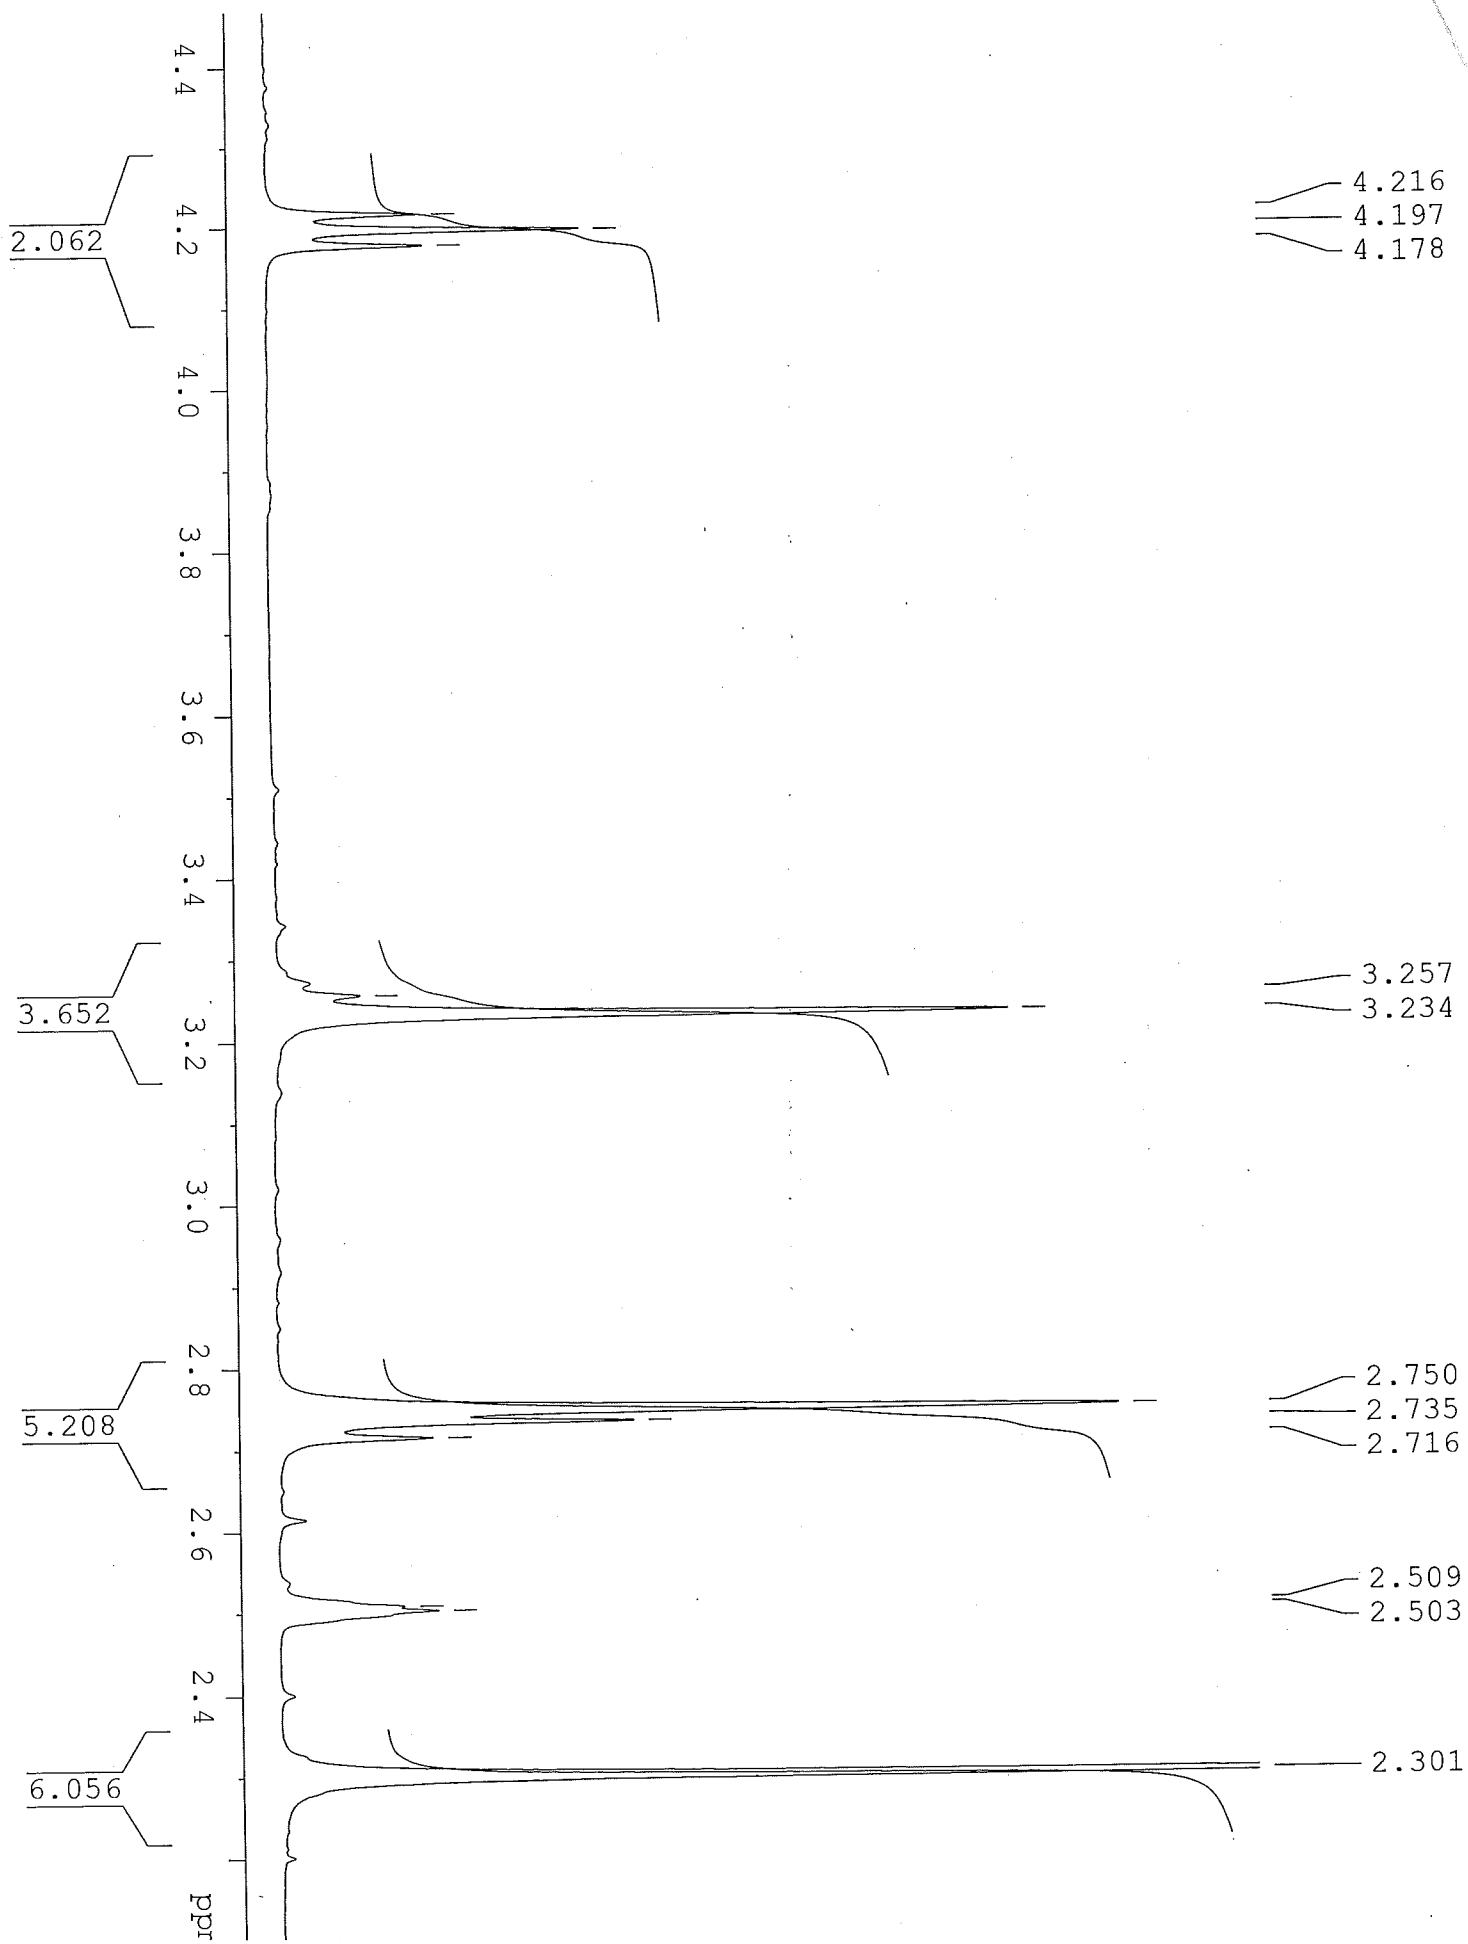

Current Data Parameters  
 NAME VB-GSA-02115-13C  
 EXPNO 1  
 PROCNO 1

F2 - Acquisition Parameters:  
 Date\_ 20110113  
 Time 10.45  
 INSTRUM spect  
 PROBD 5 mm QNP 1H/1  
 PULPROG zgpg30  
 TD 65536  
 SOLVENT DMSO  
 NS 18650  
 DS 4  
 SWH 17985.611 H:  
 FIDRES 0.274439 H:  
 AQ 1.8219508 s:  
 RG 3251  
 DW 27.800 u:  
 DE 6.00 u:  
 TE 300.0 K  
 D1 2.00000000 s:  
 d11 0.03000000 s:  
 d12 0.00002000 s:

CHANNEL F1  
 NUC1 13C  
 P1 6.00 u:  
 PL1 2.00 d:  
 SFO1 75.4752653 M

CHANNEL F2  
 CPDPRG2 waltz16  
 NUC2 1H  
 PCPD2 80.00 u:  
 PL2 0.00 d:  
 PL12 19.47 d:  
 PL13 19.00 d:  
 SFO2 300.1312005 M

F2 - Processing parameters:  
 SI 32768  
 SF 75.4677190 M  
 WDW EM  
 SSB 0  
 LB 1.00 H:  
 GB 0  
 PC 1.00

153.093  
 150.586  
 142.061  
 141.240  
 138.258  
 133.180  
 129.056  
 124.417  
 124.242  
 122.531  
 116.647  
 111.977  
 109.654  
 108.726

67.451  
 58.782  
 46.392  
 41.222  
 40.944  
 40.665  
 40.387  
 40.108  
 39.830  
 39.552

15.115  
 12.761

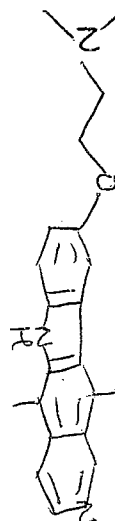

VB-GSA-02115

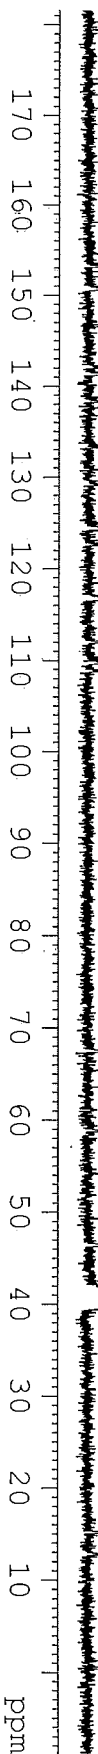

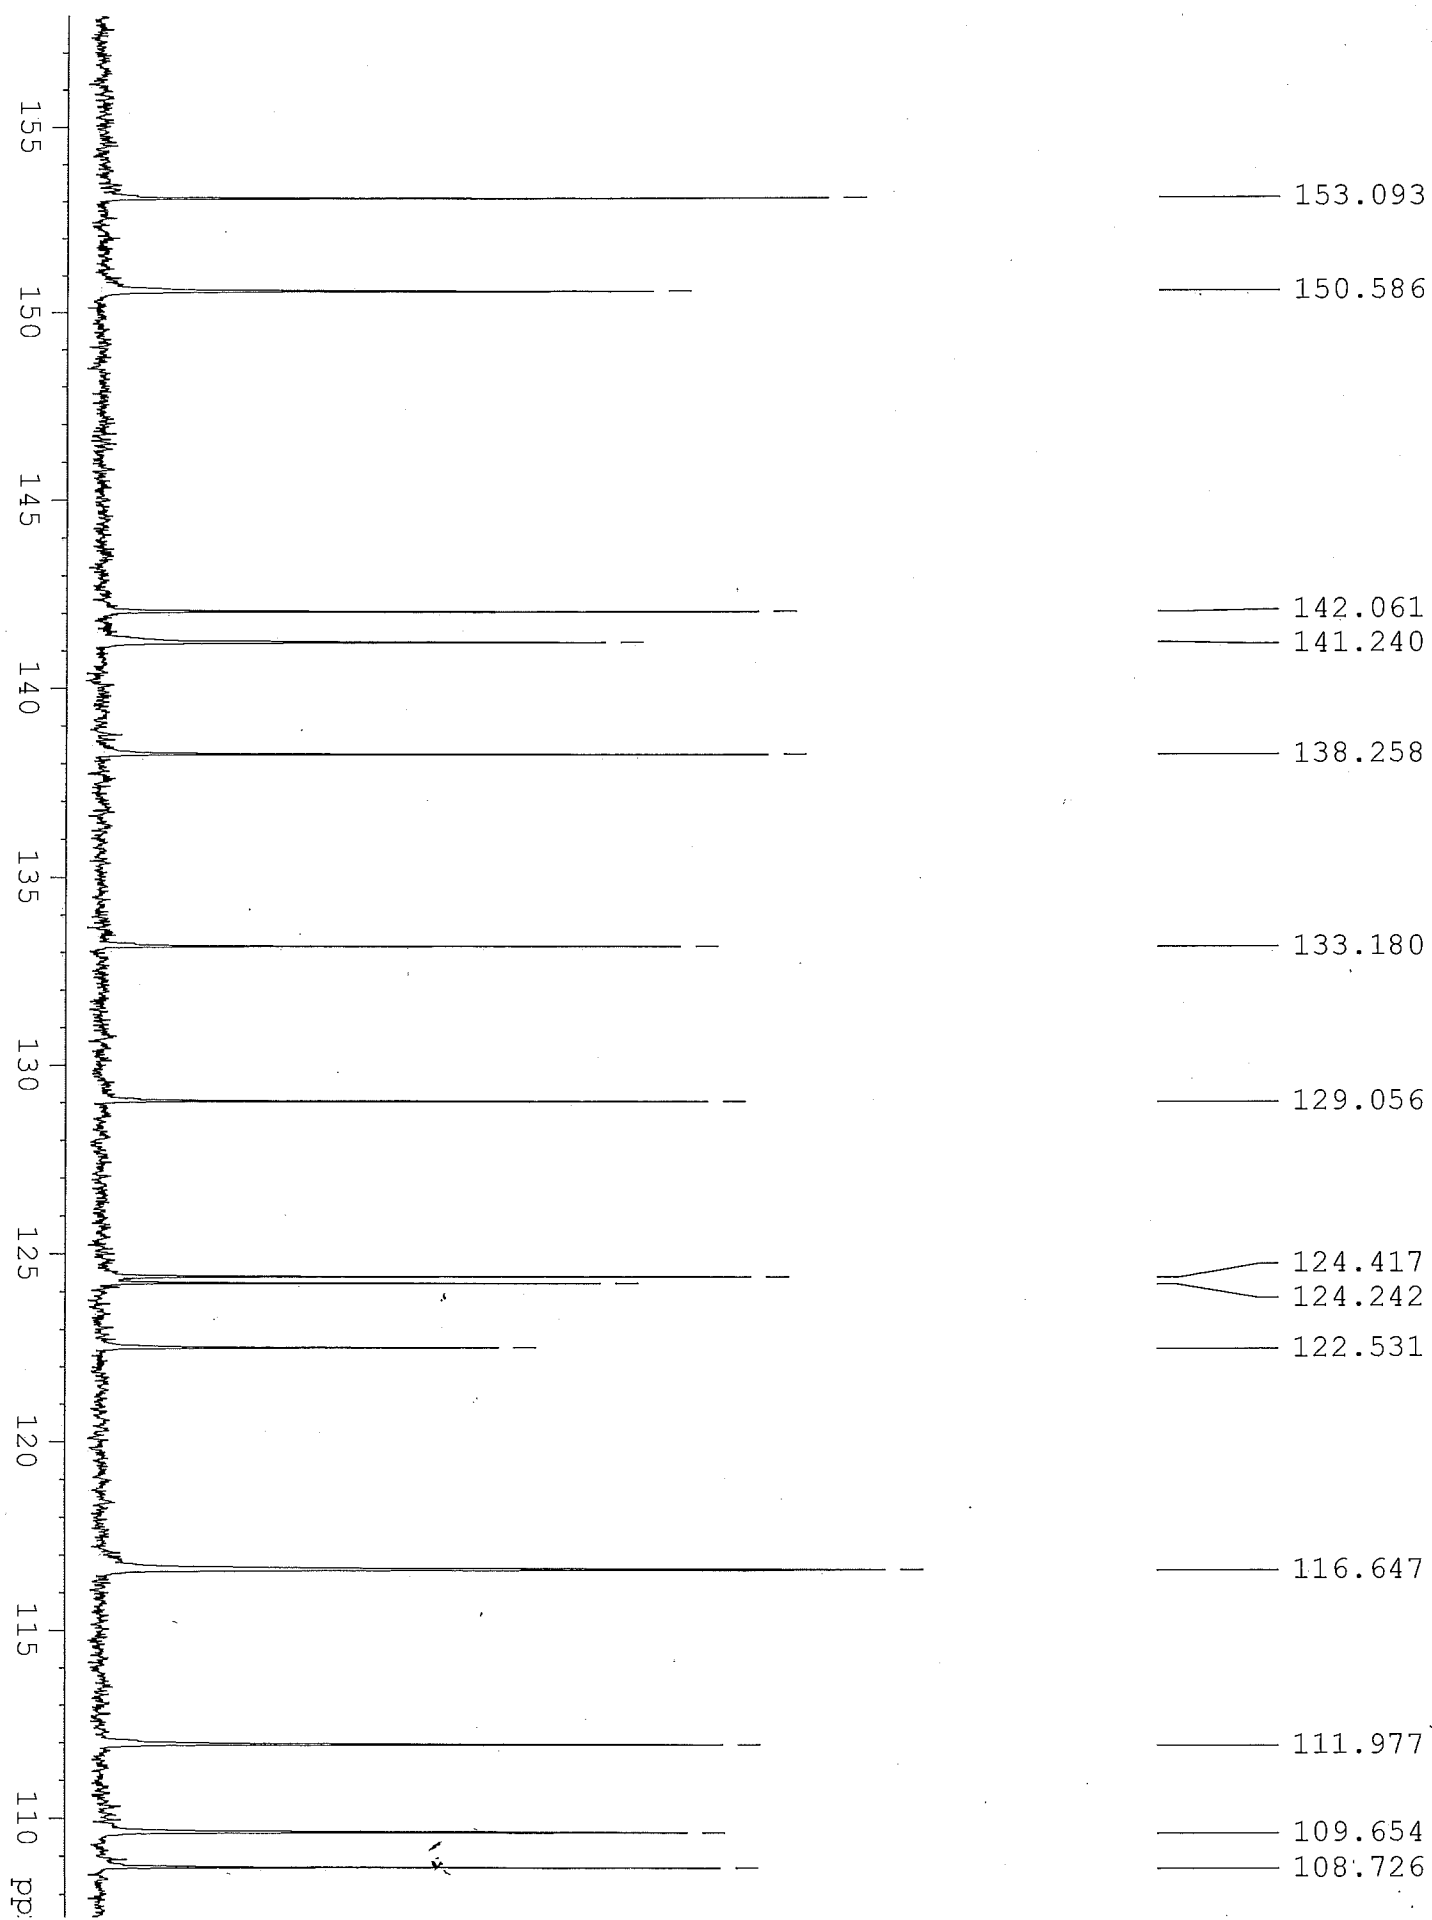



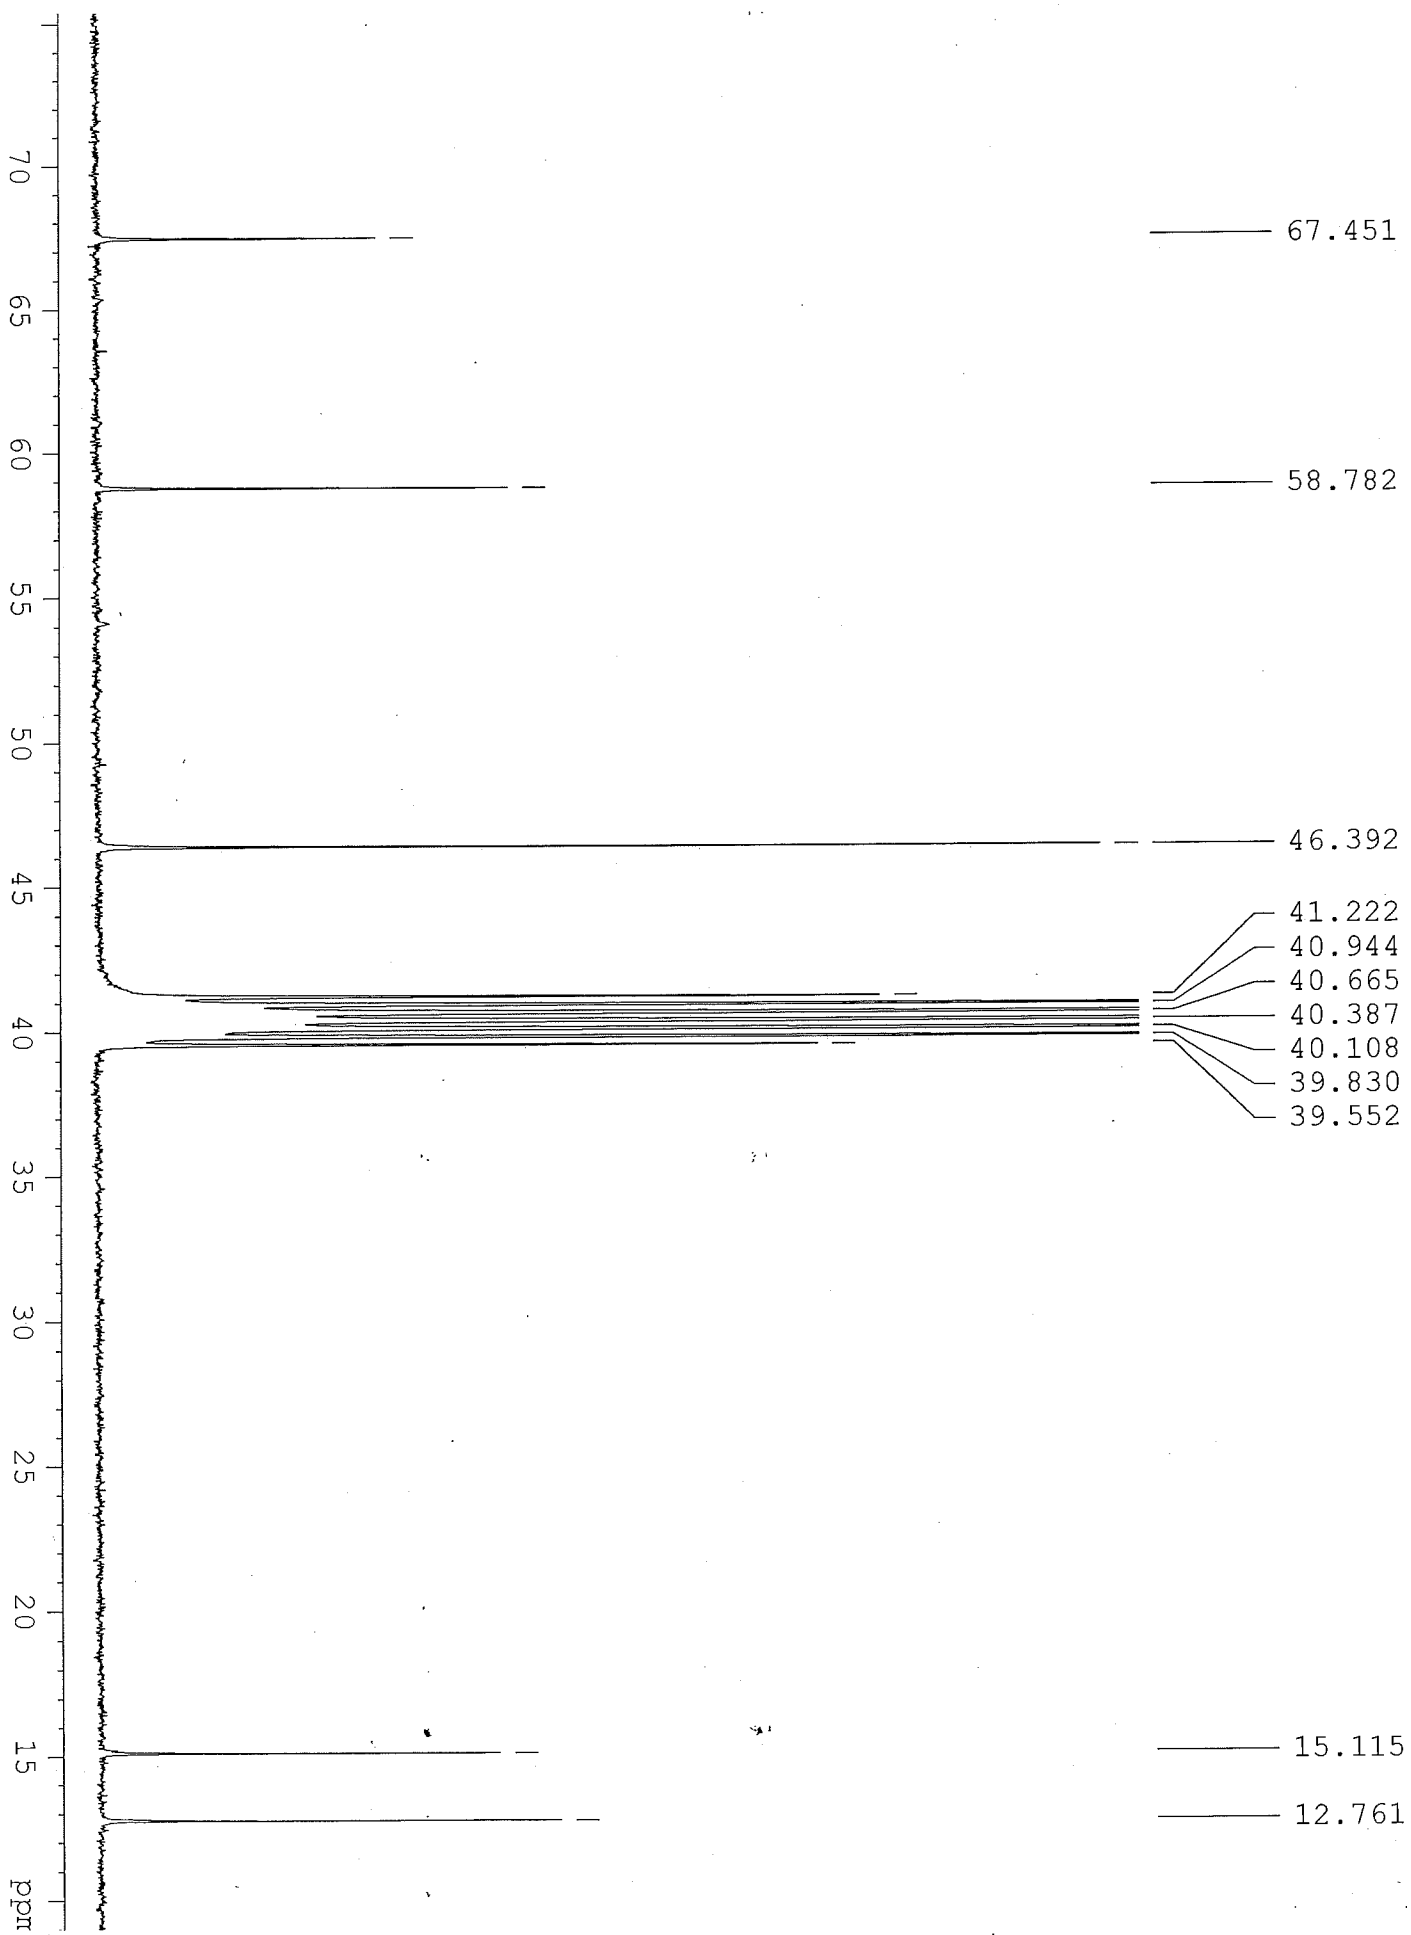

Injection Date : 1/11/2011 5:22:07 PM

Sample Name : VB-GSA-02-115

Location : Vial 2

Acq. Operator : Karen

Inj : 1

Acq. Instrument : Instrument 1

Inj Volume : 0.1 µl

Method : C:\HPCHEM\1\METHODS\LC\_MS\_UV.M

Last changed : 1/11/2011 5:19:55 PM by Karen

Zorbax SB C18, 150 x 4.6, 3.5µ, 30/70/0.25, MeOH/water/formic, POS, 150-550; frag 70; 40C, cap  
volt 2500, gas temp 325; drying gas 10

MSD1 TIC, MS File (HURLEY10\JAN11\_09.D) API-ES, Pos, Scan, Frag: 70, "positive scan"

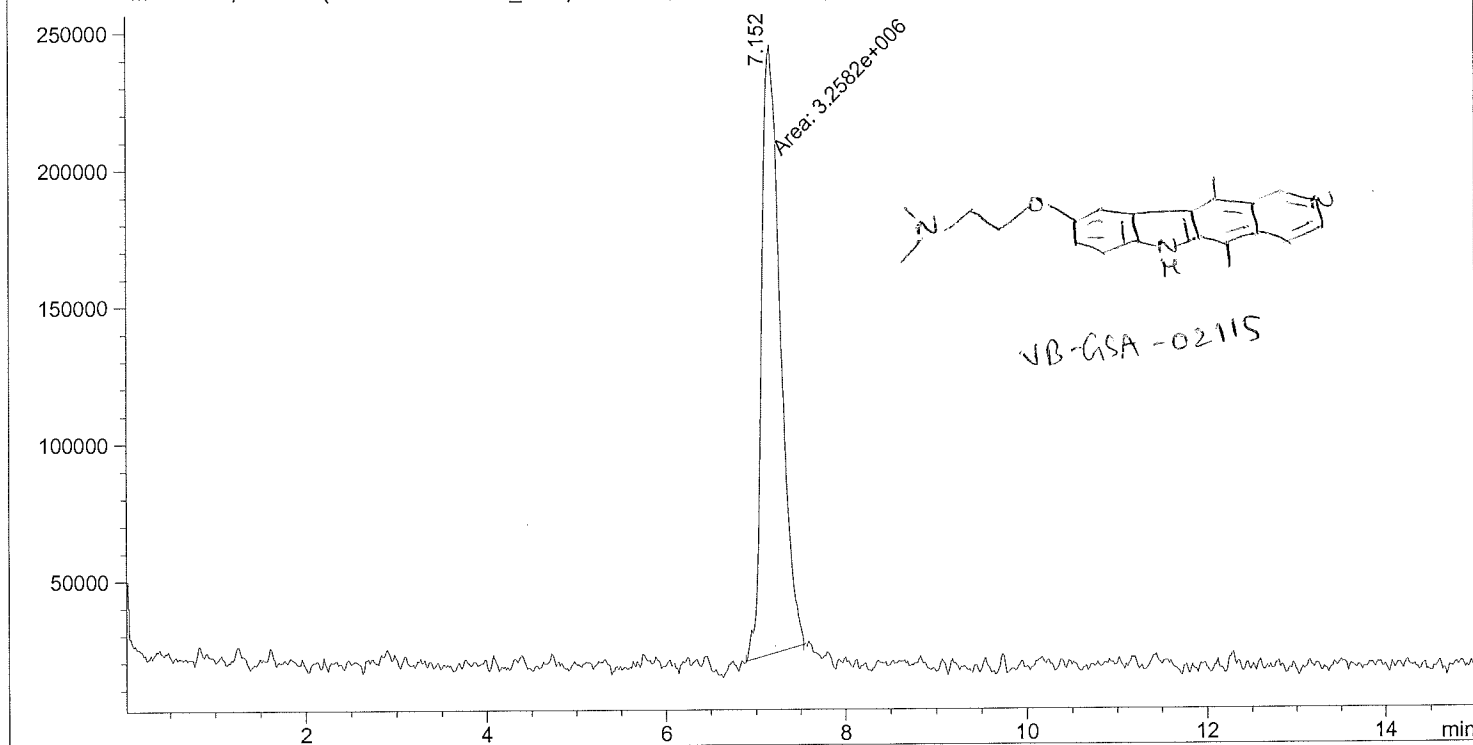

## Area Percent Report

Sorted By : Signal  
Multiplier : 1.0000  
Dilution : 1.0000  
Use Multiplier & Dilution Factor with ISTDs

Signal 1: MSD1 TIC, MS File

| Peak # | RetTime [min] | Type | Width [min] | Area      | Height    | Area %   |
|--------|---------------|------|-------------|-----------|-----------|----------|
| 1      | 7.152         | MM   | 0.2431      | 3.25820e6 | 2.23333e5 | 100.0000 |

Totals : 3.25820e6 2.23333e5

\*\*\* End of Report \*\*\*

```
=====
Injection Date   : 1/11/2011 5:22:07 PM
Sample Name      : VB-GSA-02-115
Acq. Operator    : Karen
Acq. Instrument  : Instrument 1
Method           : C:\HPCHEM\1\METHODS\LC_MS_UV.M
Last changed     : 1/11/2011 5:19:55 PM by Karen
Zorbax SB C18, 150 x 4.6, 3.5u,30/70/0.25,MeOH/water/formic, POS, 150-550; frag 70; 40C, cap
volt 2500, gas temp 325; drying gas 10
=====
```

Current Chromatogram(s)

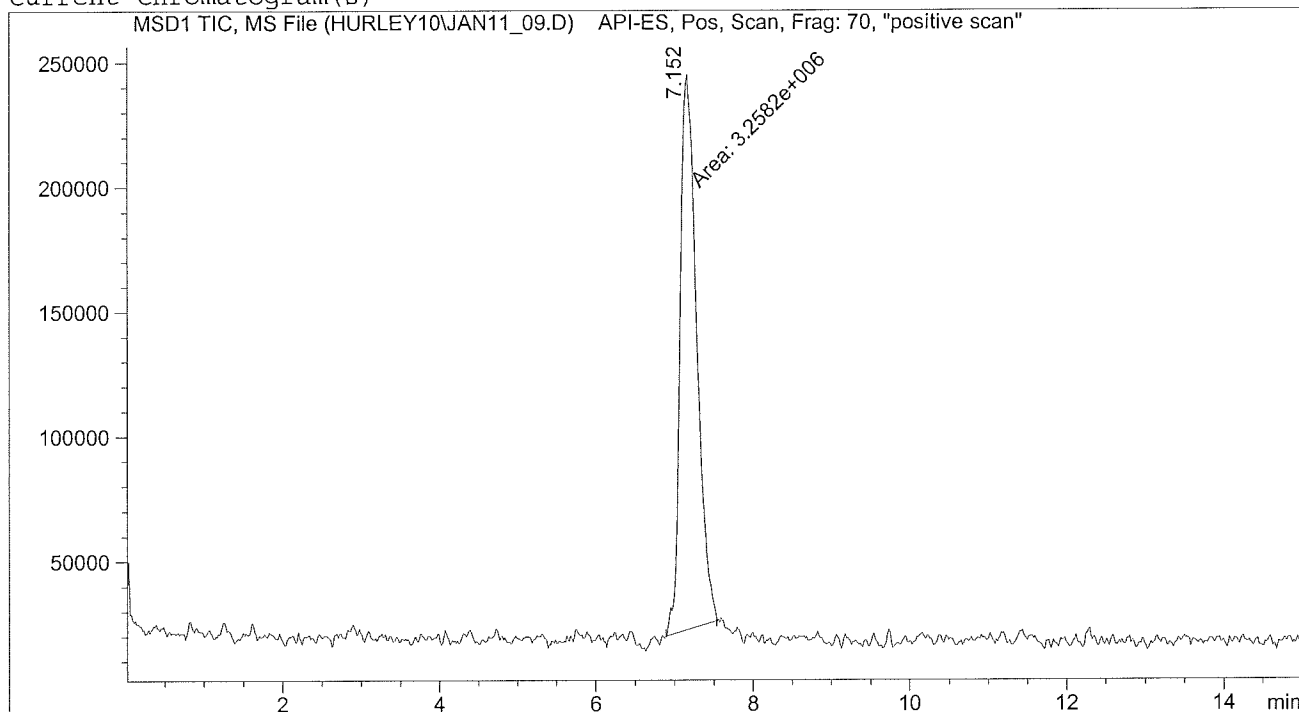

Apex Mass Spectrum of Peak 7.152 of JAN11\_09.D

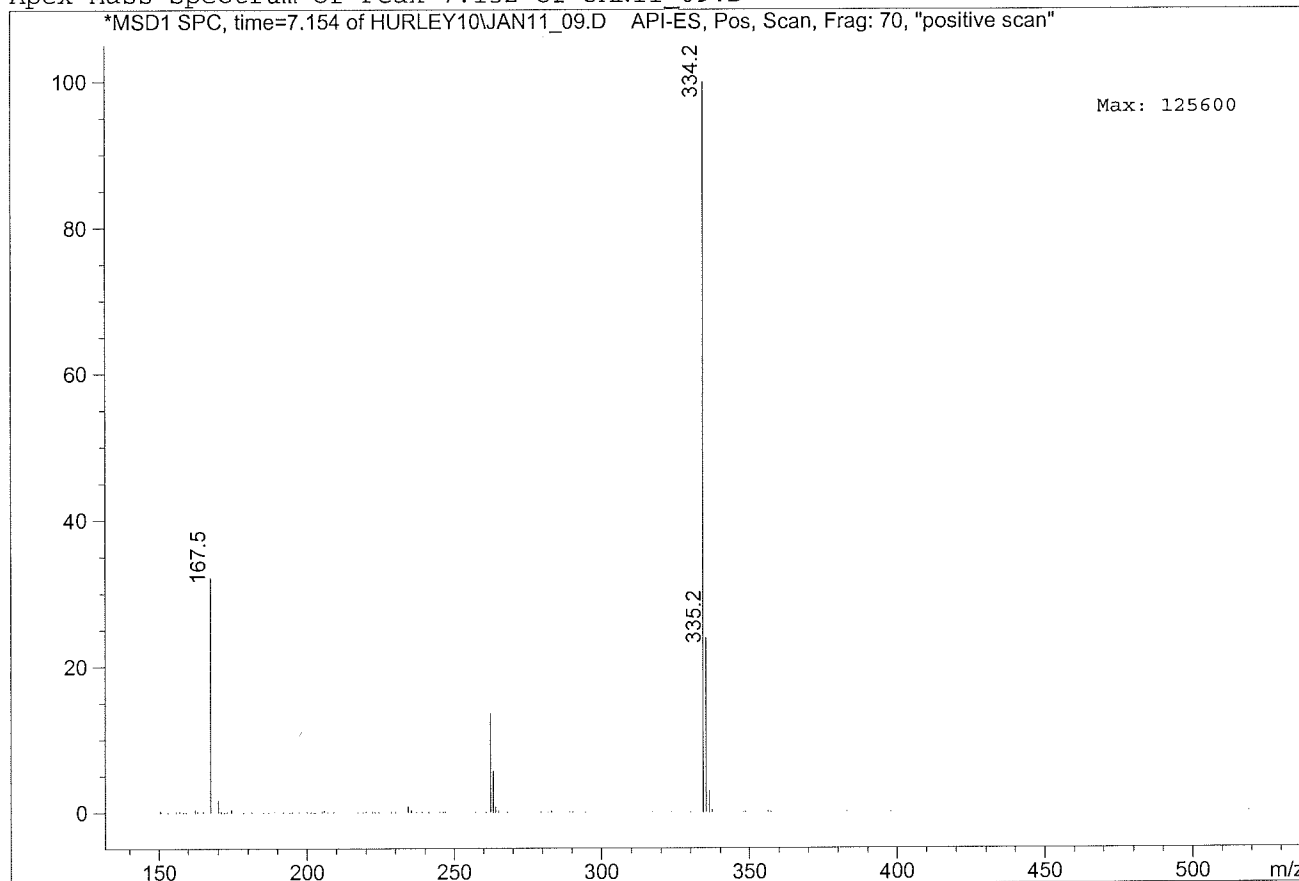

VB-02115 #59-63 RT: 1.40-1.47 AV: 5 NL: 1.62E7  
T: + p Full ms [ 50.00-1000.00]

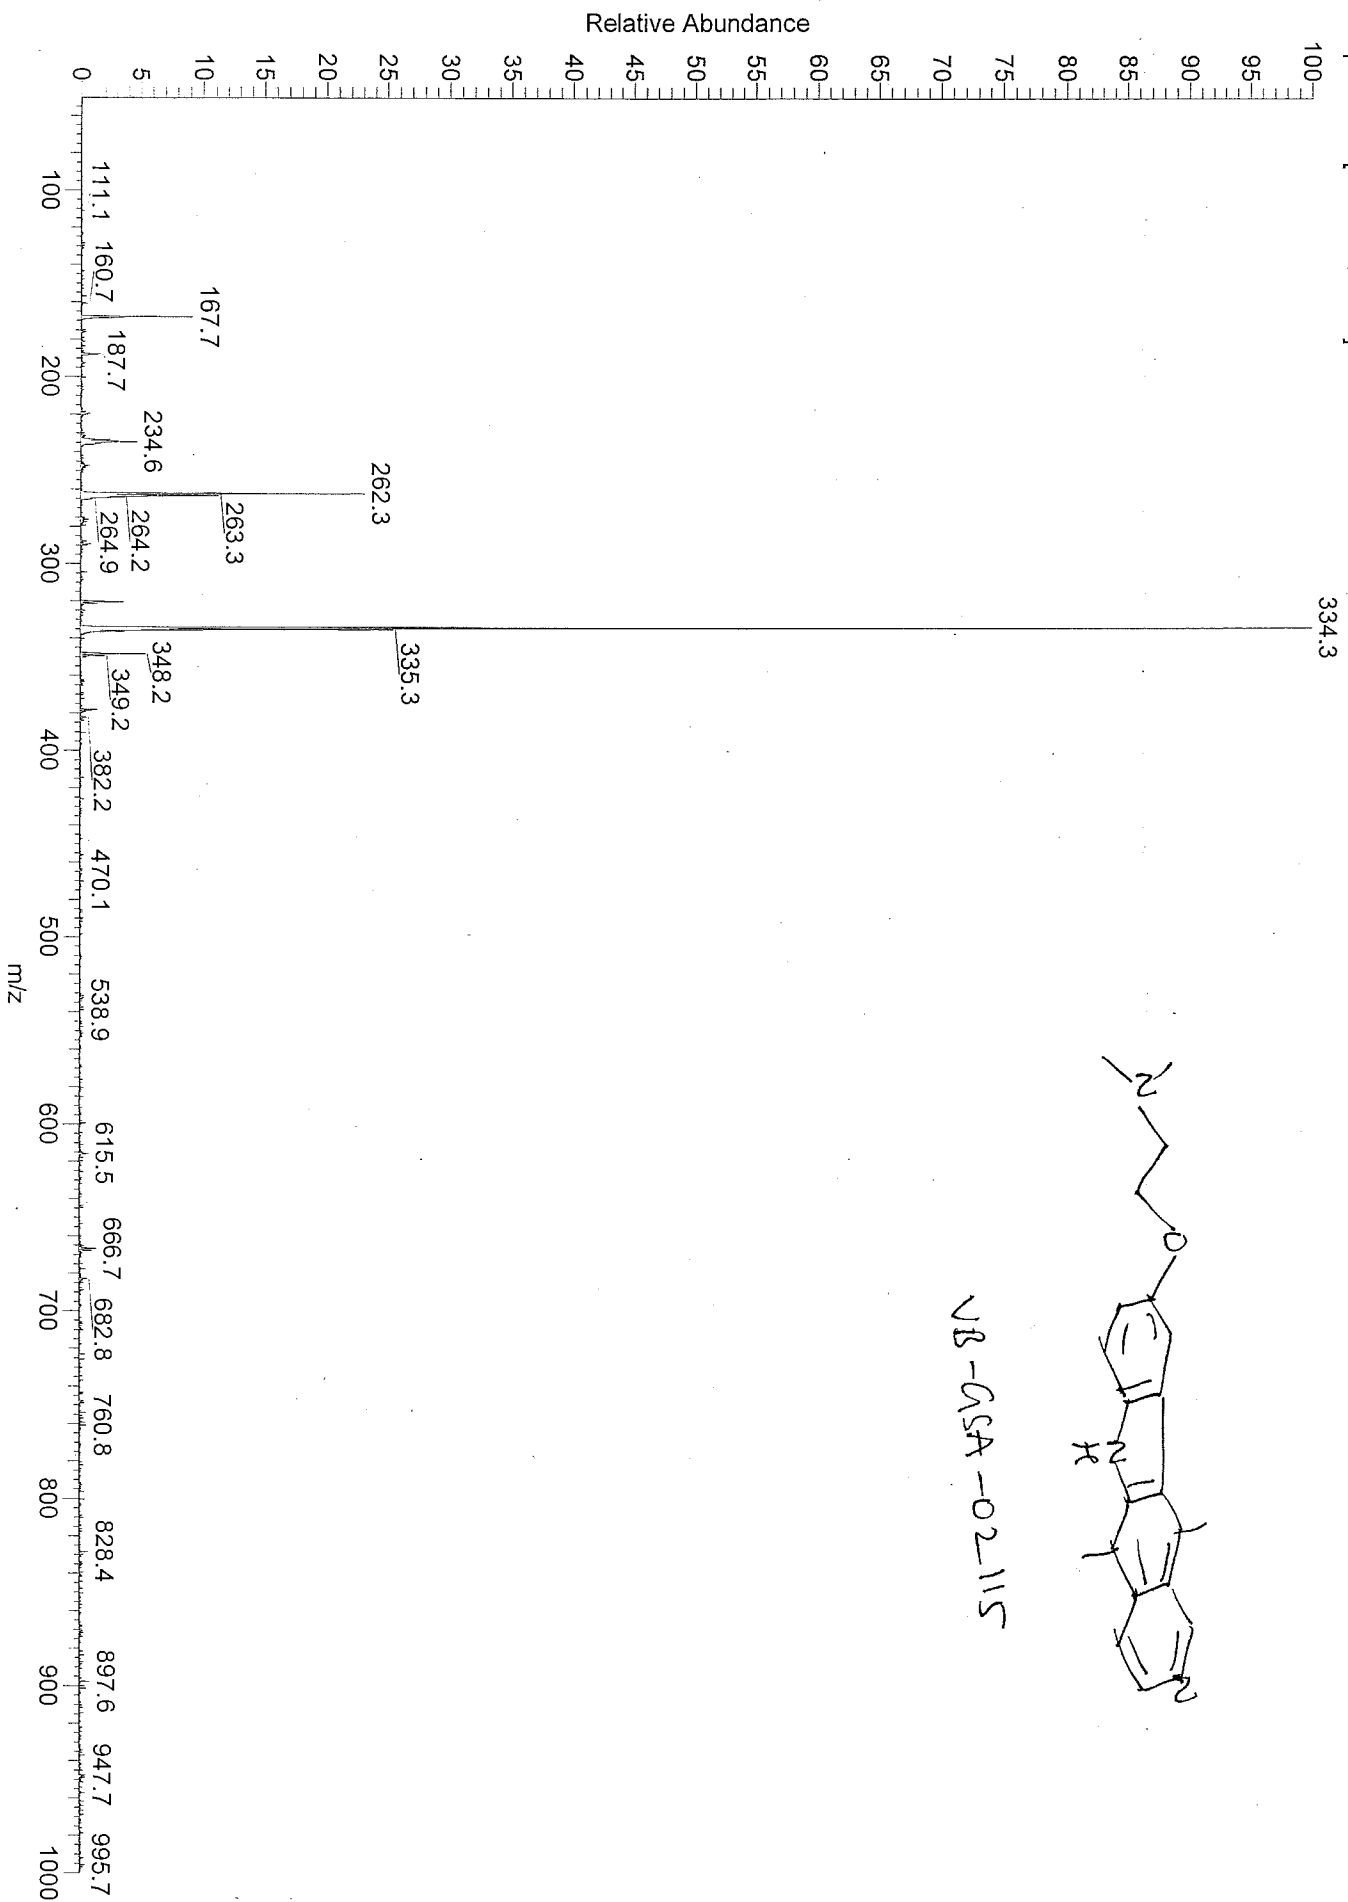

# Generic Display Report

## Analysis Info

Analysis Name D:\DATA\Facility\_Jan\_11\VB\_02115\_000003.d  
Method ESI\_101506  
Sample Name VB\_02115  
Comment Venkat B., ACN:H2O 1:1.0.1%FA

Acquisition Date 1/18/2011 4:14:22 PM

Operator  
Instrument apex-Ultra

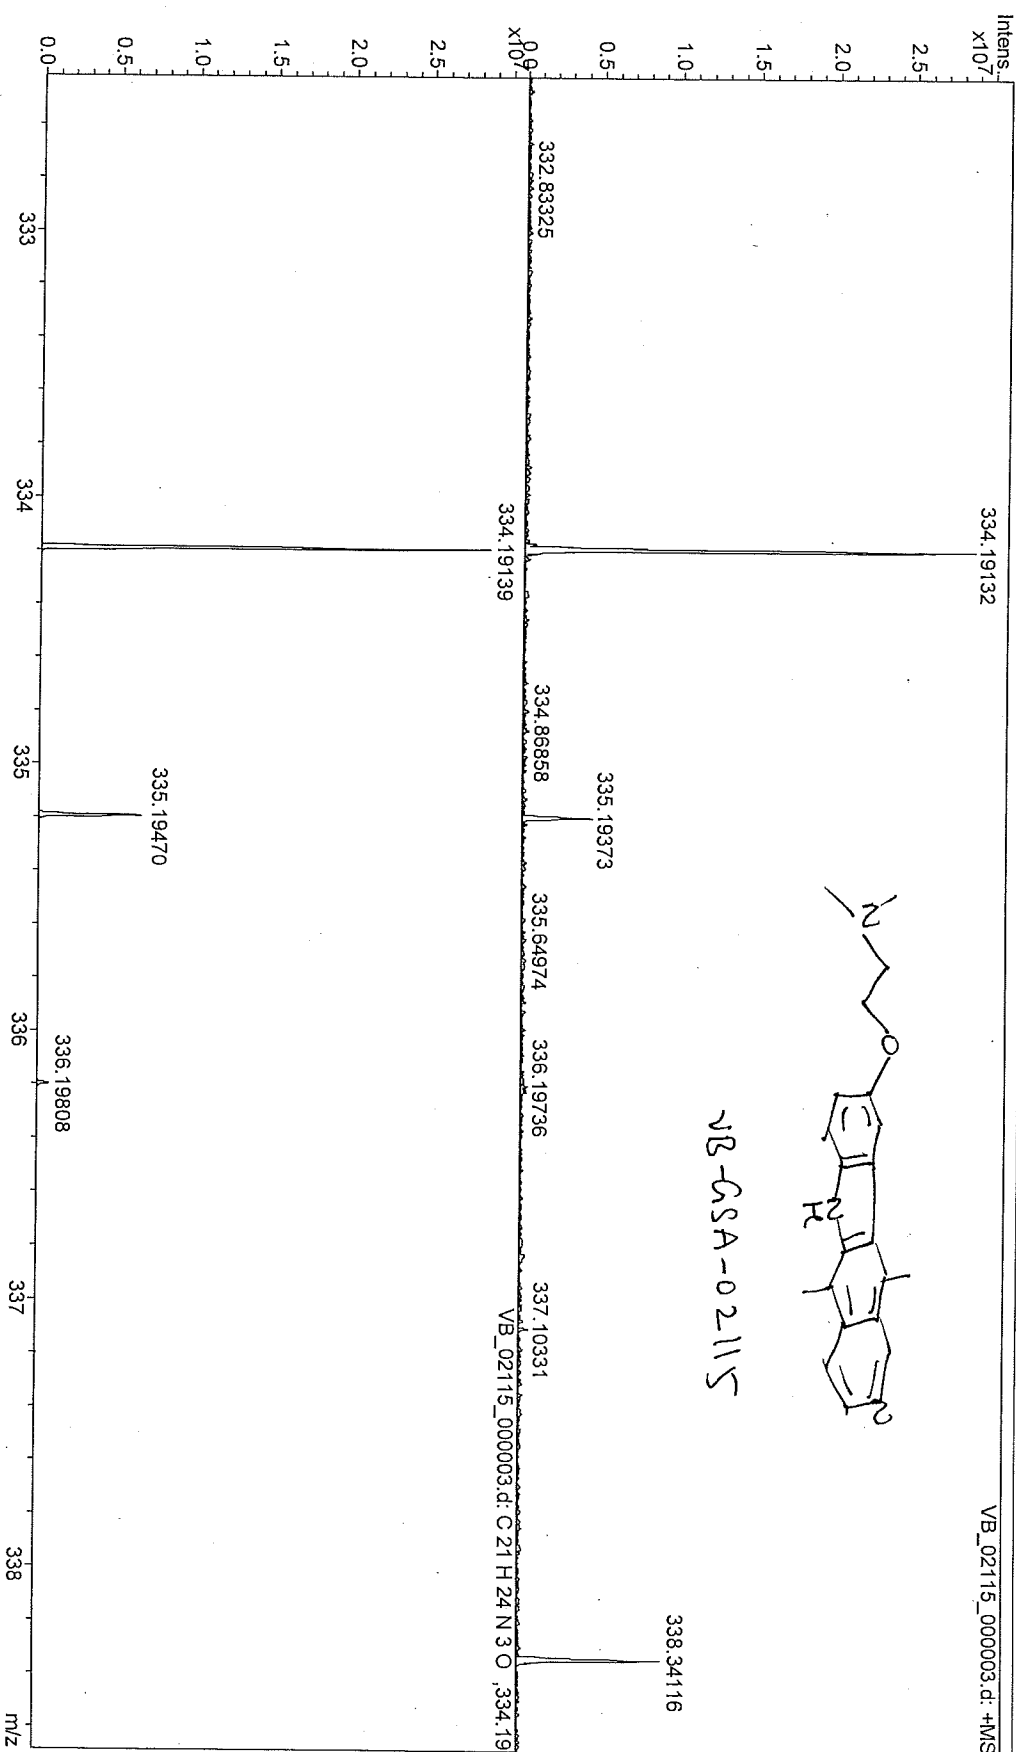

# SmartFormula Manually

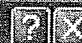

Min

Max

Generate

Help

Note: for  $m < 2000$  the elements C, H, N, and O are considered implicitly.

Measured  $m/z$   Tolerance  mDa  Charge

| Meas. $m/z$ | # | Formula                                          | Score  | $m/z$     | err [mDa] | err [ppm] | mSigma | rdB  | e <sup>-</sup> Conf | N-Rule |
|-------------|---|--------------------------------------------------|--------|-----------|-----------|-----------|--------|------|---------------------|--------|
| 334.19132   | 1 | C <sub>21</sub> H <sub>24</sub> N <sub>3</sub> O | 100.00 | 334.19139 | 0.1       | 0.2       | 46.8   | 11.5 | even                | ok     |

☐ Automatically locate monoisotopic peak Maximum number of formulas

☒ Check rings plus double bonds Minimum  Maximum

☒ Filter H/C element ratio Minimum H/C  Maximum H/C

☒ Estimate carbon number Electron configuration

☒ Generate immediately

Show Pattern

Current Data Parameters  
 NAME ascs02-66-2  
 EXPNO 1  
 PROCNO 1

F2 - Acquisition Parameters  
 Date\_ 20100920  
 Time 13.48  
 INSTRUM spect  
 PROBHD 5 mm BBO BB-1H  
 PULPROG zg30  
 TD 32768  
 SOLVENT DMSO  
 NS 16  
 DS 4  
 SWH 6248.749 Hz  
 FIDRES 0.190697 Hz  
 AQ 2.6220949 sec  
 RG 256  
 DW 80.016 usec  
 DE 6.00 usec  
 TE 298.0 K  
 D1 0.00000000 sec  
 TDO 1

===== CHANNEL f1 =====  
 NUC1 1H  
 P1 12.50 usec  
 PL1 -2.00 dB  
 SFO1 499.3829460 MHz

F2 - Processing parameters  
 SI 32768  
 SF 499.3800000 MHz  
 WDW EM  
 SSB 0  
 LB 0.20 Hz  
 GB 0  
 PC 1.00

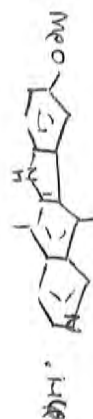

9.934

8.397  
 8.391  
 7.888  
 7.618  
 7.601  
 7.312  
 7.307  
 7.294  
 7.290

3.941  
 3.891  
 3.376  
 3.307  
 2.837  
 2.522  
 2.518  
 2.515

1.000

2.079

0.995

0.992

0.989

3.165

3.091

3.008

12 11 10 9 8 7 6 5 4 3 2 1 pp

Current Data Parameters  
 NAME ascs02-66-2  
 EXPNO 1  
 PROCNO 1

F2 - Acquisition Parameters  
 Date\_ 20100920  
 Time 13.48  
 INSTRUM spect  
 PROBHD 5 mm BBO BB-1H  
 PULPROG zg30  
 TD 32768  
 SOLVENT DMSO  
 NS 16  
 DS 4  
 SWH 6248.749 Hz  
 FIDRES 0.190697 Hz  
 AQ 2.6220949 sec  
 RG 256  
 DW 80.016 usec  
 DE 6.00 usec  
 TE 298.0 K  
 D1 0.00000000 sec  
 TD0 1

===== CHANNEL f1 =====  
 NUC1 1H  
 P1 12.50 usec  
 PL1 -2.00 dB  
 SFO1 499.3829460 MHz

F2 - Processing parameters  
 SI 32768  
 SF 499.3800000 MHz  
 WDW EM  
 SSB 0  
 LB 0.20 Hz  
 GB 0  
 PC 1.00

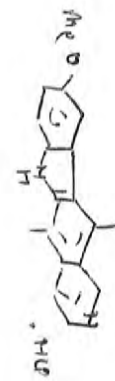

- 9.934
- 8.397
- 8.391
- 7.888
- 7.618
- 7.601
- 7.312
- 7.307
- 7.294
- 7.290
- 3.941
- 3.891
- 3.376
- 3.307
- 2.837
- 2.522
- 2.518
- 2.515

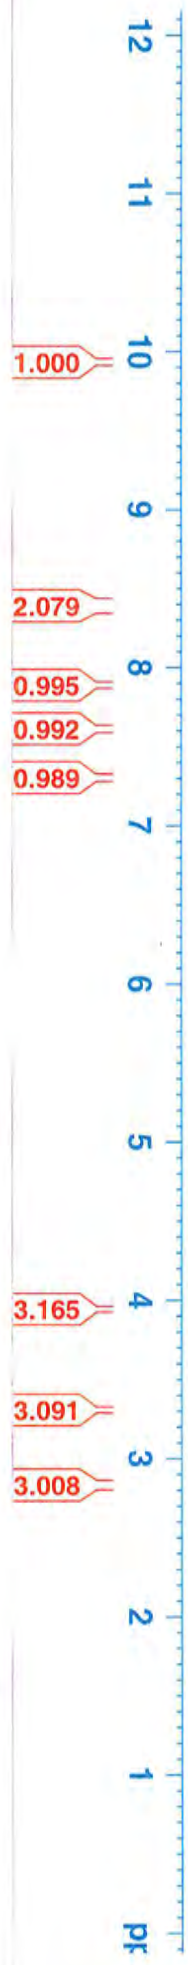



154.587  
145.055  
143.642  
137.731  
133.934  
133.840  
127.654  
126.018  
123.100  
119.810  
117.187  
112.698  
110.401  
108.168

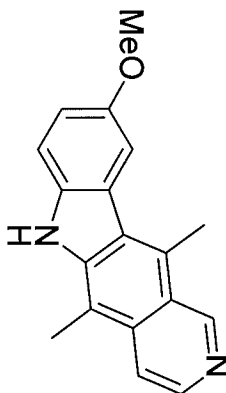

Current Data Parameters  
NAME asgsa02-66-C  
EXPNO 5  
PROCNO 1

F2 - Acquisition Parameters  
Date\_ 20100922  
Time\_ 14.07  
INSTRUM spect  
PROBHD 5 mm QNP 1H/1  
PULPROG zgpg30  
TD 65536  
SOLVENT CDCl3  
NS 3656  
DS 4  
SWH 17985.611  
FIDRES 0.274439  
AQ 1.8219508  
RG 2580.3  
DW 27.800  
DE 6.00

56.460  
41.241  
40.962  
40.684  
40.406  
40.128  
39.849  
39.571

160  
150  
140  
130  
120  
110  
100  
90  
80  
70  
60  
50  
40  
30  
20  
10  
ppm

Current Data Parameters  
NAME asgsa02-66-C  
EXPNO 5  
PROCNO 1

F2 - Acquisition Parameters  
Date\_ 20100922  
Time\_ 14.07  
INSTRUM spect  
PROBHD 5 mm QNP 1H/1  
PULPROG zgpg30  
TD 65536  
SOLVENT CDCl3  
NS 3656  
DS 4  
SWH 17985.611  
FIDRES 0.274439  
AQ 1.8219508  
RG 2580.3  
DW 27.800  
DE 6.00

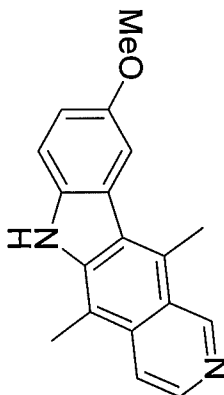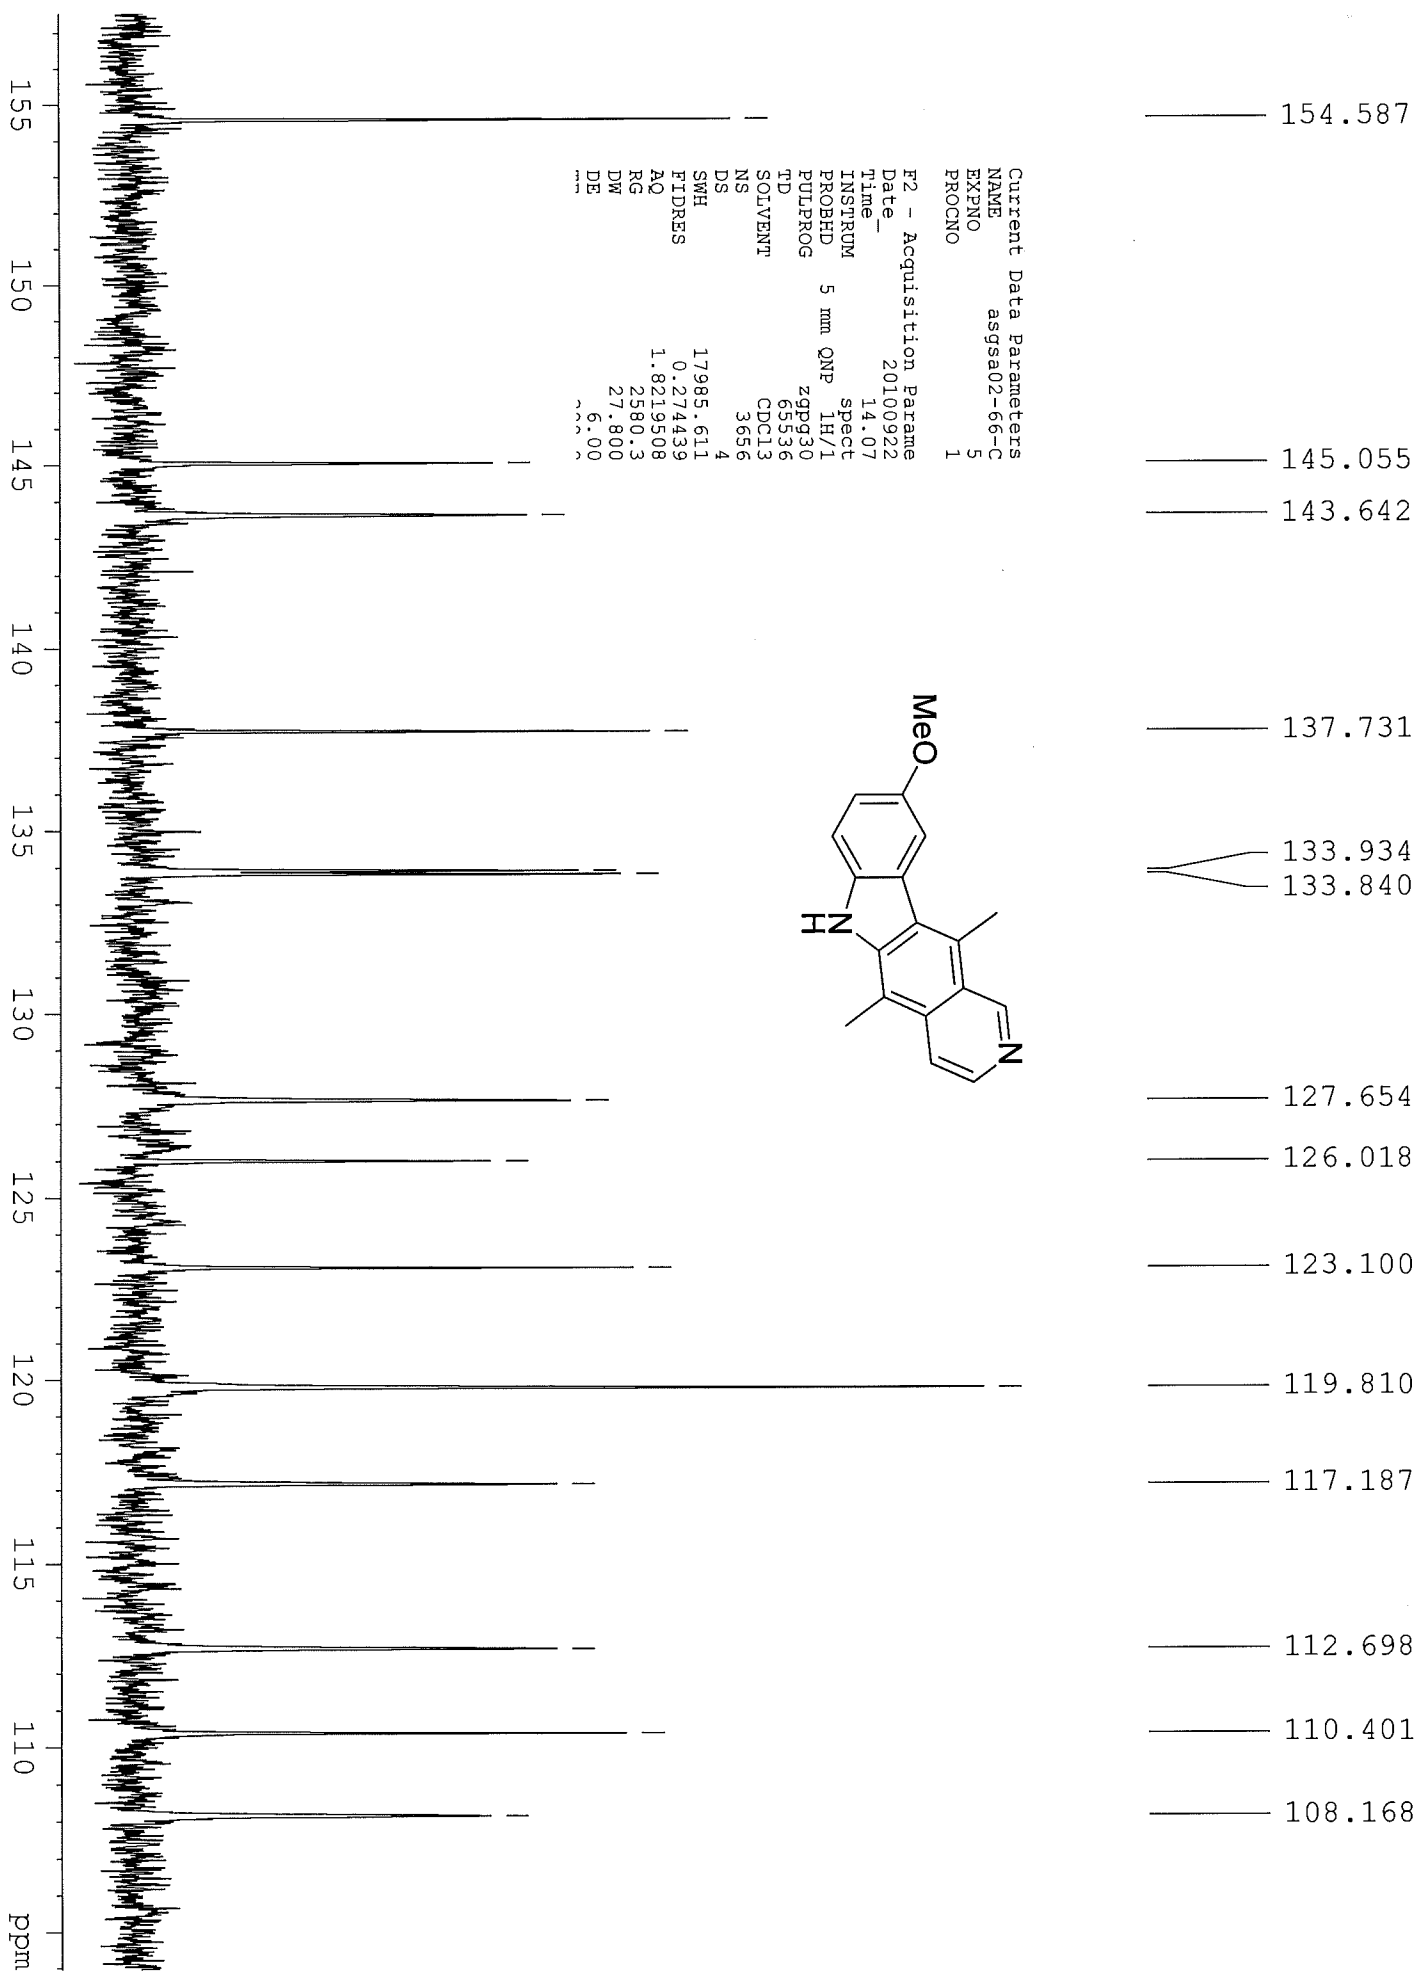

=====

Injection Date : 9/16/2010 4:06:49 PM  
Sample Name : AS-02/66-i Location : Vial 6  
Acq. Operator : Karen Inj : 1  
Acq. Instrument : Instrument 1 Inj Volume : 0.1 µl  
Method : C:\HPCHEM\1\METHODS\LC\_MS.M  
Last changed : 9/16/2010 4:05:11 PM by Karen  
(modified after loading)

Zorbax SB C18, 150 x 4.6, 3.5µ, 60:40:0.25, MeOH/H2O/formic, POS, 150-400; frag 70; 25C, cap  
volt 2000, gas temp 325; drying gas 10

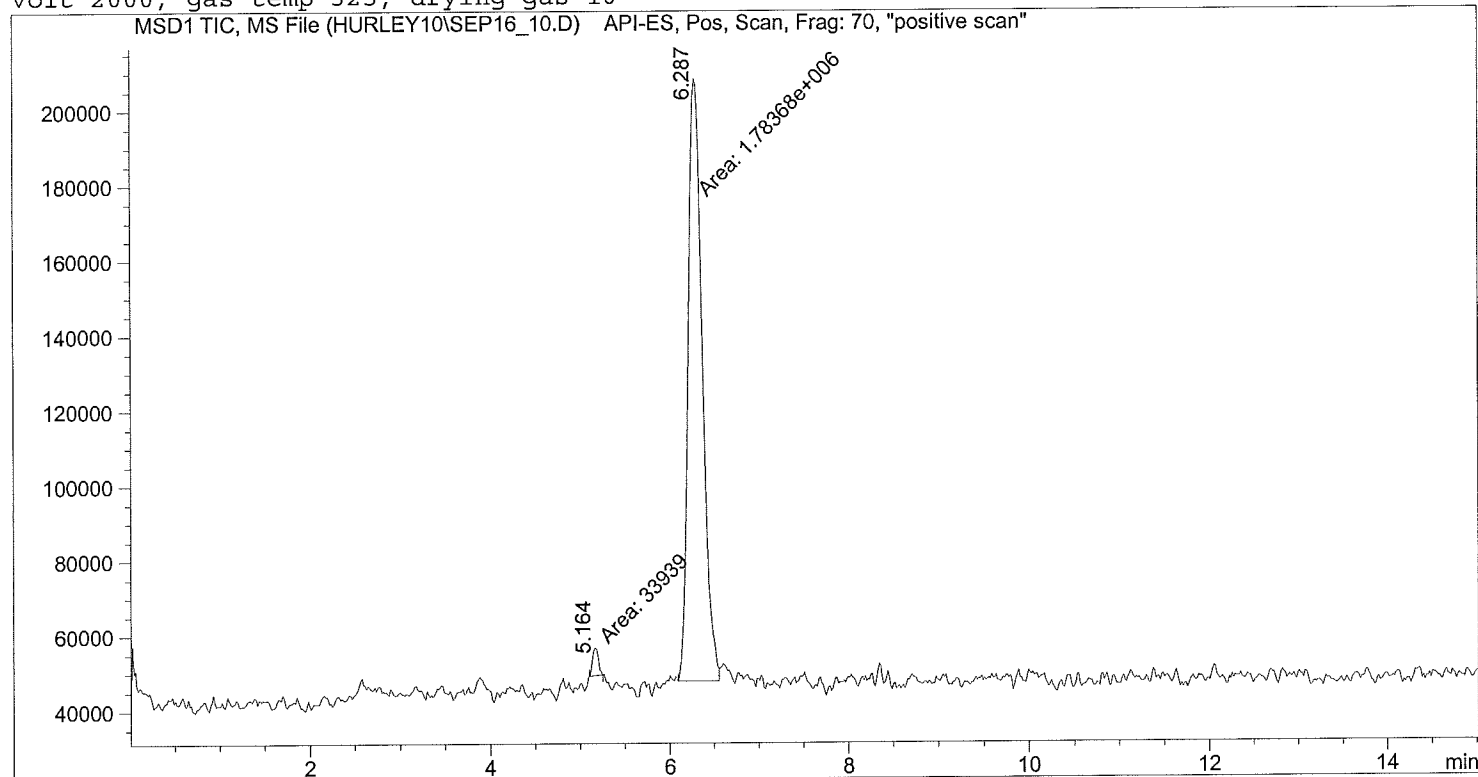

## =====

## Area Percent Report

Sorted By : Signal  
Multiplier : 1.0000  
Dilution : 1.0000  
Use Multiplier & Dilution Factor with ISTDs

Signal 1: MSD1 TIC, MS File

| Peak # | RetTime [min] | Type | Width [min] | Area      | Height     | Area %  |
|--------|---------------|------|-------------|-----------|------------|---------|
| 1      | 5.164         | MM   | 0.0763      | 3.39390e4 | 7411.62695 | 1.8672  |
| 2      | 6.287         | MM   | 0.1845      | 1.78368e6 | 1.61115e5  | 98.1328 |

Totals : 1.81762e6 1.68527e5

=====

\*\*\* End of Report \*\*\*

CHO2\_66 #3-12 RT: 0.04-0.22 AV: 10 NL: 4.12E6  
T: + p Full ms [ 50.00-1000.00]

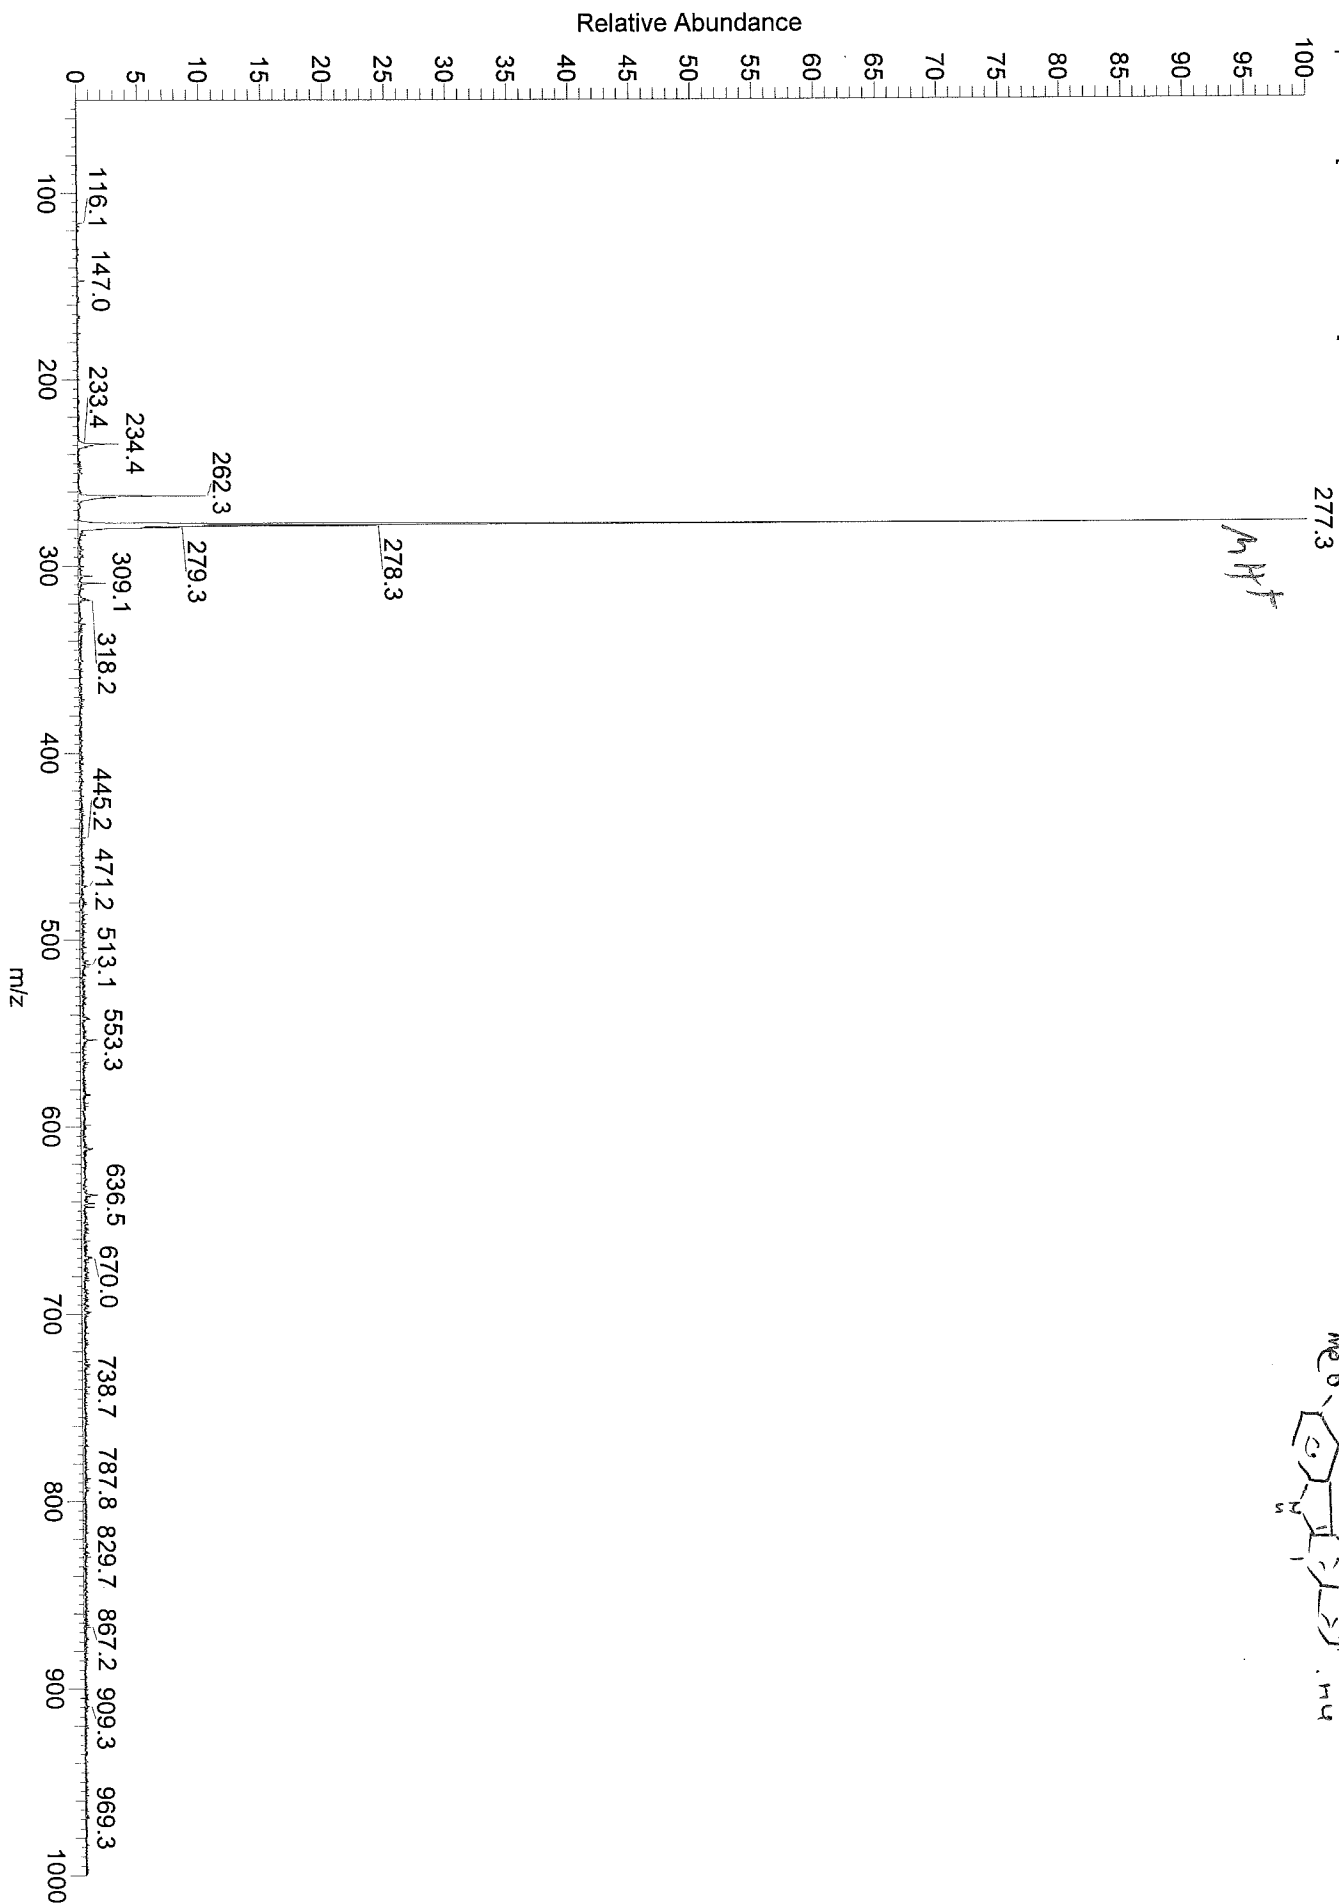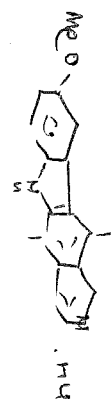

# Generic Display Report

## Analysis Info

Analysis Name D:\DATA\Facility\_Sept\_10\as02-66\_0000002.d  
Method ESL\_101506  
Sample Name as02-66  
Comment Anuj S., positive mode, ACN:H2O 1:1:0.1%FA

Acquisition Date 9/17/2010 4:10:40 PM

Operator  
Instrument apex-Ultra

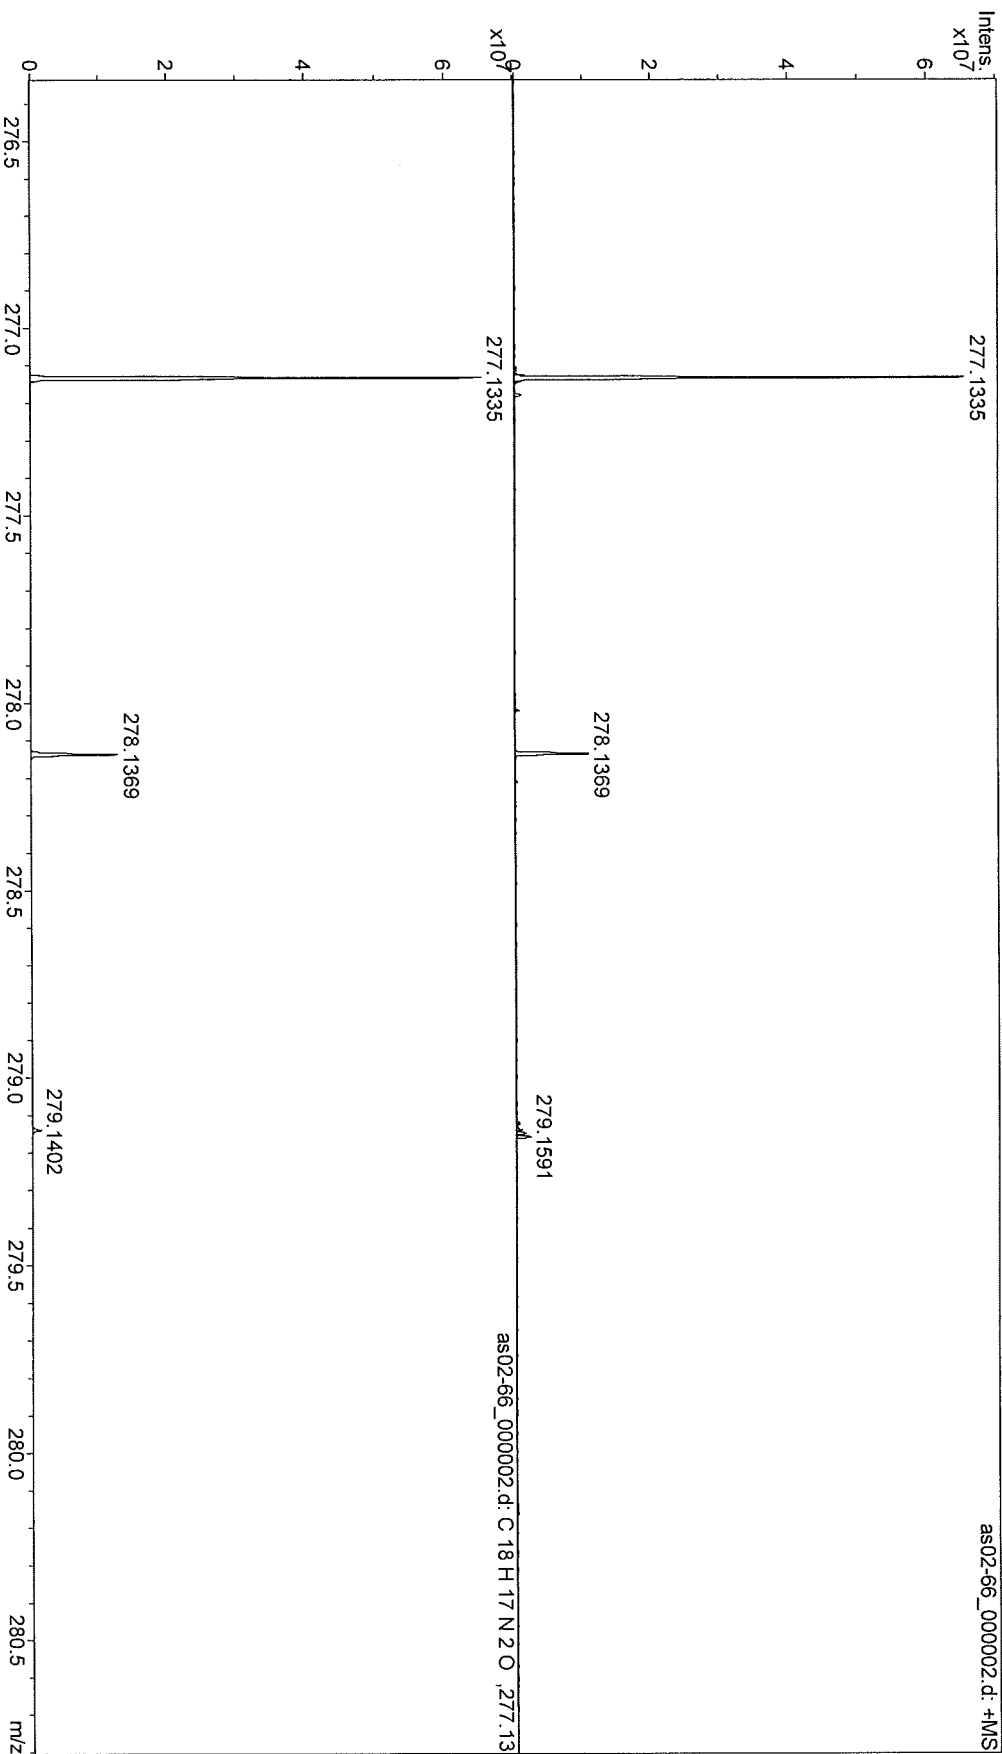

# SmartFormula Manually

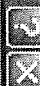

Min

C<sub>9</sub>

Generate

Max

C 9-n

Help

Note: for m < 2000 the elements C, H, N, and O are considered implicitly.

Measured m/z

277.1335

Tolerance

2

mDa

Charge

1

Meas. m/z

#

Formula

Score

m/z

err [mDa]

err [ppm]

mSigma

rdb

e\_Conf

N-Rule

277.1335

1

C18H17N2O

100.00

277.1335

-0.0

-0.0

20.4

11.5

even

ok

☐ Automatically locate monoisotopic peak

Maximum number of formulas

500

☒ Check rings plus double bonds

Minimum

-0.5

Maximum

40

Electron configuration

☒ Filter H/C element ratio

Minimum H/C

0

Maximum H/C

3

☒ Estimate carbon number

☒ Generate immediately

Show Pattern

9.695  
8.511  
8.490  
7.918  
7.902  
7.895  
7.434  
7.405  
7.281  
7.229  
7.220  
7.199  
7.191

4.607  
4.582  
4.557  
3.983  
3.248  
2.992  
2.366  
2.343  
2.320  
2.259  
2.058  
2.035  
2.010  
1.985

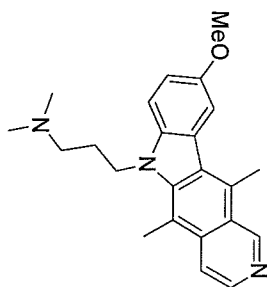

C<sub>23</sub>H<sub>27</sub>N<sub>3</sub>O  
Exact Mass: 361.22

1.003

1.020

2.024

1.090

1.035

2.021

3.177

3.027

3.020

2.084

6.110

2.279

Current Data Parameters  
NAME CV-GSA-02110  
EXPNO 1  
PROCNO 1

F2 - Acquisition Parameters  
Date\_ 20110412  
Time\_ 16.31  
INSTRUM spect  
PROBHD 5 mm QNP 1H/1  
PULPROG zg30  
TD 65536  
SOLVENT CDCl<sub>3</sub>  
NS 16  
DS 2  
SWH 6172.839 Hz  
FIDRES 0.094190 Hz  
AQ 5.3084660 sec  
RG 256  
DW 81.000 usec  
DE 6.00 usec  
TE 300.0 K  
D1 1.00000000 sec

===== CHANNEL f1 =====  
NUC1 1H  
P1 8.50 usec  
PL1 0.00 dB  
SFO1 300.1318534 MHz

F2 - Processing parameters  
SI 32768  
SF 300.1300000 MHz  
WDW EM  
SSB 0  
LB 0.30 Hz  
GB 0  
PC 1.00

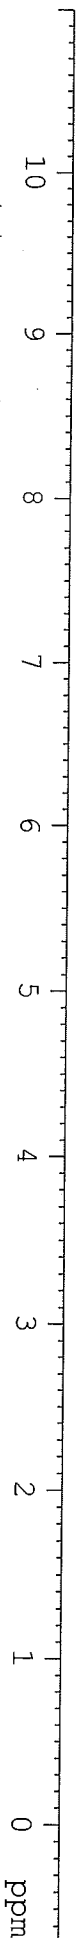

9.695

8.511  
8.490

7.918  
7.902  
7.895

7.434  
7.405  
7.281  
7.229  
7.220  
7.199  
7.191

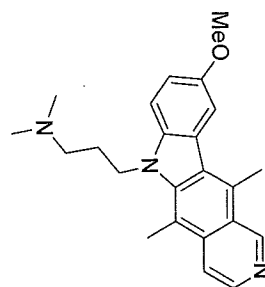

$C_{23}H_{27}N_3O$   
Exact Mass: 361.22

1.003

1.020

2.024

1.090

1.035

ppm

Current Data Parameters  
NAME CV-GSA-02110  
EXPNO 1  
PROCNO 1

F2 - Acquisition Parameters  
Date\_ 20110412  
Time 16.31  
INSTRUM spect  
PROBHD 5 mm QNP 1H/1  
PULPROG zg30  
TD 65536  
SOLVENT CDCl3  
NS 16  
DS 2  
SWH 6172.839 Hz  
FIDRES 0.094190 Hz  
AQ 5.308460 sec  
RG 256  
DW 81.000 usec  
DE 6.00 usec  
TE 300.0 K  
D1 1.00000000 sec

===== CHANNEL f1 =====  
NUC1 1H  
P1 8.50 usec  
PL1 0.00 dB  
SFO1 300.1318534 MHz

F2 - Processing Parameters  
SI 32768  
SF 300.1300000 MHz  
WDW EM  
SSB 0  
LB 0.30 Hz  
GB 0  
PC 1.00



4.607  
4.582  
4.557

3.983

3.248

2.992

2.366  
2.343  
2.320  
2.259

2.058  
2.035  
2.010  
1.985

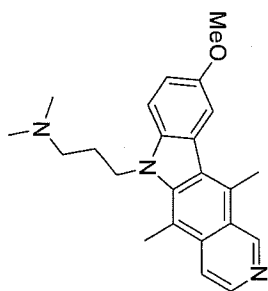

$C_{23}H_{27}N_3O$   
Exact Mass: 361.22

2.021

3.177

3.027

3.020

2.084

6.110

2.279

ppm

Current Data Parameters  
NAME CV-GSA-02110  
EXPNO 1  
PROCNO 1

F2 - Acquisition Parameters  
Date\_ 20110412  
Time\_ 16.31  
INSTRUM spect  
PROBHD 5 mm QNP 1H/1  
PULPROG zg30  
TD 65536  
FIDRES 0.094190 Hz  
AQ 5.308460 sec  
RG 256  
DW 81.000 usec  
DE 6.00 usec  
TE 300.0 K  
D1 1.00000000 sec

===== CHANNEL f1 =====  
NUC1 1H  
P1 8.50 usec  
PL1 0.00 dB  
SFO1 300.1318534 MHz

F2 - Processing parameters  
SI 32768  
SF 300.130000 MHz  
WDW EM  
SSB 0  
LB 0.30 Hz  
GB 0  
PC 1.00

154.261  
150.154  
141.909  
141.350  
139.876  
134.772  
129.398  
125.346  
124.696  
122.894  
116.295  
114.854  
109.734  
109.296  
108.823

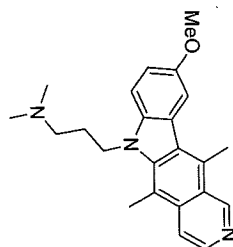

$C_{23}H_{17}N_3O$   
Exact Mass: 361.22

77.856  
77.637  
77.433  
77.010

57.026  
56.685

45.852  
44.359

28.483

15.110  
13.960

Current Data Parameters  
NAME CV-GSA-02110  
EXPNO 2  
PROCNO 1

F2 - Acquisition Parameters  
Date\_ 20110413  
Time 8.39

INSTRUM spect  
PROBHD 5 mm QNP 1H/1  
PULPROG zgpg30  
TD 65536  
SOLVENT CDCl3  
NS 15000  
DS 4  
SWH 17985.611 Hz  
FIDRES 0.274439 Hz  
AQ 1.8219508 sec

RG 7298.2  
DM 27.800 usec  
DE 6.00 usec  
TE 300.0 K  
D1 2.00000000 sec  
d11 0.03000000 sec  
d12 0.00020000 sec

CHANNEL F1  
NUC1 13C  
P1 6.00 usec  
PL1 2.00 dB  
SFO1 75.4752653 MHz

CHANNEL F2  
CPDPRG2 waltz16  
NUC2 1H  
PCPD2 80.00 usec  
PL2 0.00 dB  
PL12 19.47 dB  
PL13 19.00 dB  
SFO2 300.1312005 MHz

F2 - Processing Parameters  
SI 32768  
SF 75.4677190 MHz  
WDW EM  
SSB 0  
LB 1.00 Hz  
GB 0  
PC 1.00

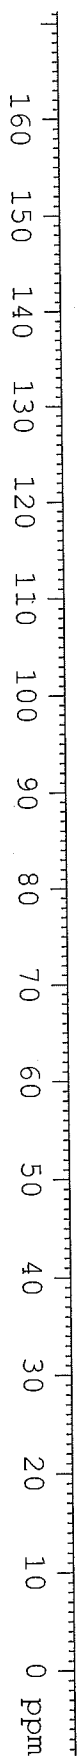

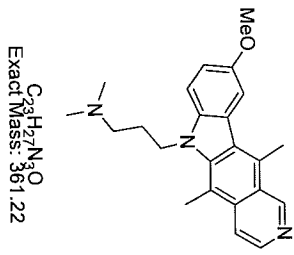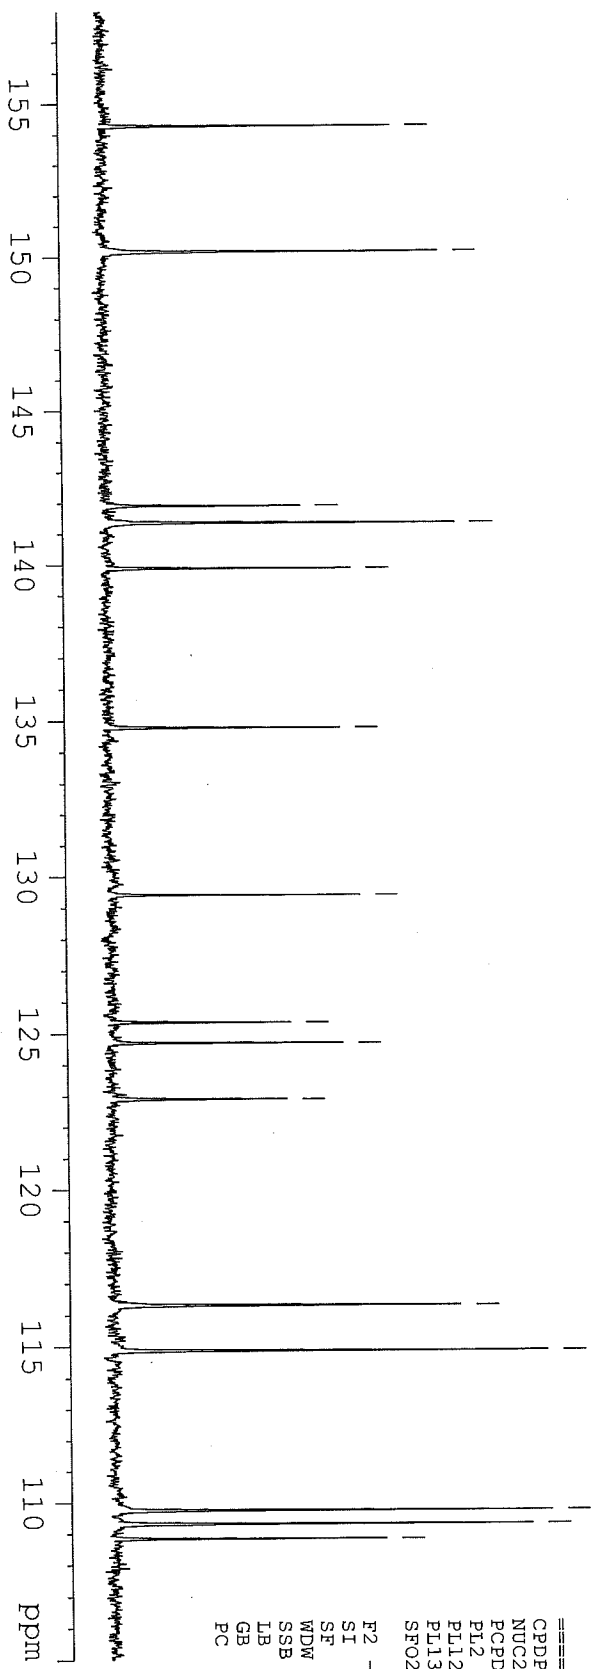

|         |
|---------|
| 154.261 |
| 150.154 |
| 141.909 |
| 141.350 |
| 139.876 |
| 134.772 |
| 129.398 |
| 125.346 |
| 124.696 |
| 122.894 |
| 116.295 |
| 114.854 |
| 109.734 |
| 109.296 |
| 108.823 |

Current Data Parameters  
 NAME CV-GSA-02110  
 EXPNO 2  
 PROCNO 1

F2 - Acquisition Parameters  
 Date\_ 20110413  
 Time 8.39  
 INSTRUM spect  
 PROBHD 5 mm QNP 1H/1  
 PULPROG zgpg30  
 TD 65536  
 SOLVENT CDCl3  
 NS 15000  
 DS 4  
 SWH 17985.611 Hz  
 FIDRES 0.274439 Hz  
 AQ 1.8219508 sec  
 RG 7298.2  
 DW 27.800 usec  
 DE 6.00 usec  
 TE 300.0 K  
 D1 2.00000000 sec  
 d11 0.03000000 sec  
 d12 0.00002000 sec

CHANNEL f1  
 NUC1 13C  
 P1 6.00 usec  
 PL1 2.00 dB  
 SFO1 75.4752653 MHz

CHANNEL f2  
 CPDPRG2 waltz16  
 NUC2 1H  
 PCPD2 80.00 usec  
 PL2 0.00 dB  
 PL12 19.47 dB  
 PL13 19.00 dB  
 SFO2 300.1312005 MHz

F2 - Processing Parameters  
 SI 32768  
 SF 75.4677190 MHz  
 WDW EM  
 SSB 0  
 LB 1.00 Hz  
 GB 0  
 PC 1.00

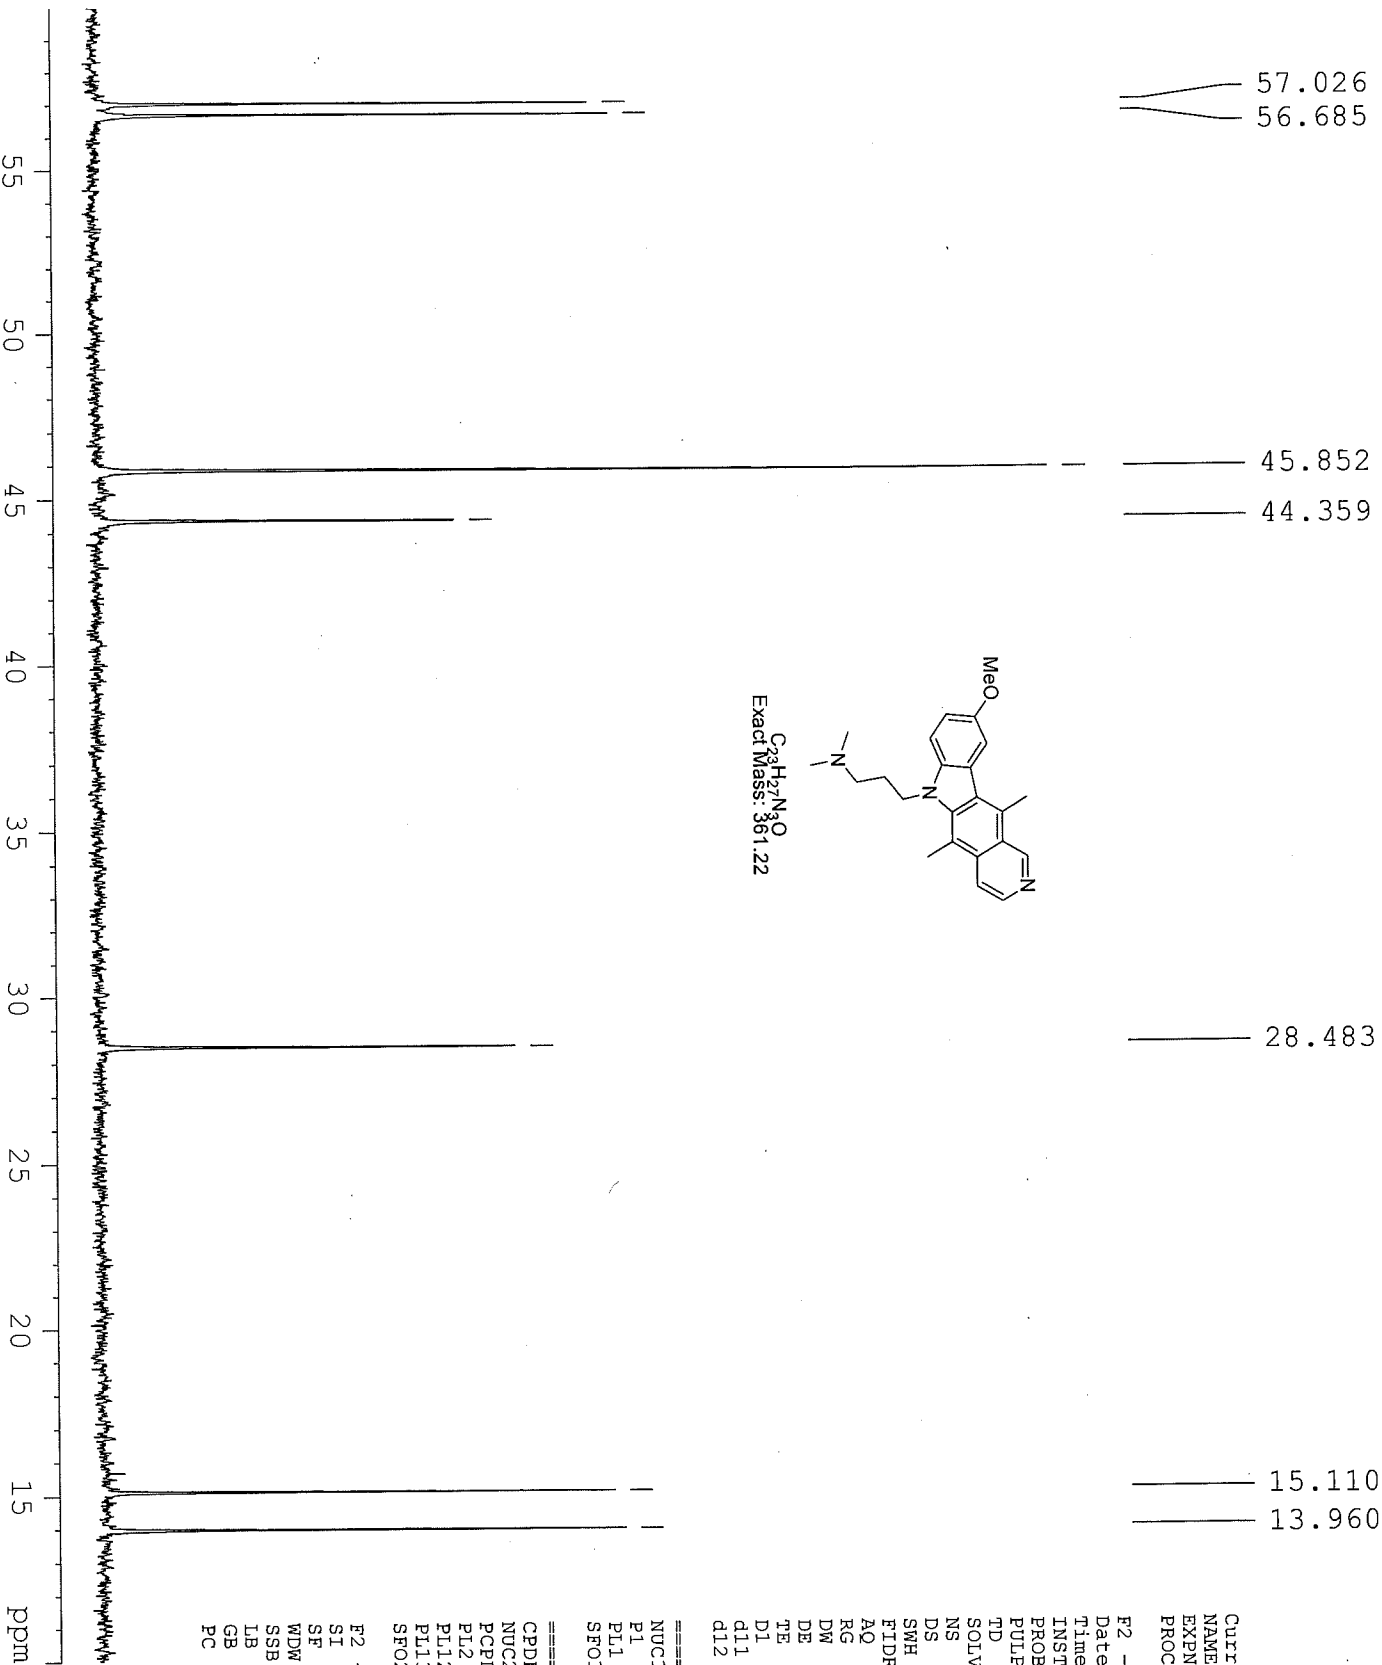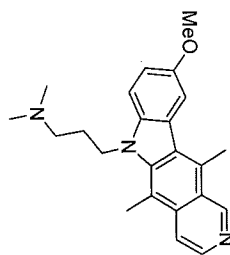

C<sub>17</sub>H<sub>17</sub>N<sub>2</sub>O  
Exact Mass: 361.22

Current Data Parameters  
NAME CV-GSA-02110  
EXPNO 2  
PROCNO 1

F2 - Acquisition Parameters  
Date\_ 20110413  
Time 8.39

INSTRUM spect  
PROBHD 5 mm QNP 1H/1  
PULPROG zgpg30  
TD 65536  
SOLVENT CDCl<sub>3</sub>  
NS 15000  
DS 4  
SWH 17985.611 Hz  
FIDRES 0.274439 Hz  
AQ 1.8219508 sec  
RG 7298.2  
DM 27.800  
DE 6.00 usec  
TE 300.0 K  
D1 2.00000000 sec  
d11 0.03000000 sec  
d12 0.00002000 sec

CHANNEL f1  
NUC1 13C  
P1 6.00 usec  
PL1 2.00 dB  
SFO1 75.4752653 MHz

CHANNEL f2  
CPDPRG2 waltz16  
NUC2 1H  
PCPD2 80.00 usec  
PL2 0.00 dB  
PL12 19.47 dB  
PL13 19.00 dB  
SFO2 300.1312005 MHz

F2 - Processing Parameters  
SI 32768  
SF 75.4677190 MHz  
WDW EM  
SSB 0  
LB 1.00 Hz  
GB 0  
PC 1.00

=====  
Injection Date : 4/11/2011 5:23:21 PM  
Sample Name : CV-GSA-02110  
Acq. Operator : Karen  
Acq. Instrument : Instrument 1  
Method : C:\HPCHEM\1\METHODS\LC\_MS\_UV.M  
Last changed : 4/11/2011 5:21:21 PM by Karen  
Zorbax SB C18, 150 x 4.6, 3.5u,35/65/0.25,MeOH/water/formic, POS, 150-500; frag 70; 35C, cap  
volt 1500, gas temp 350; drying gas 10  
Location : Vial 19  
Inj : 1  
Inj Volume : 0.1 µl

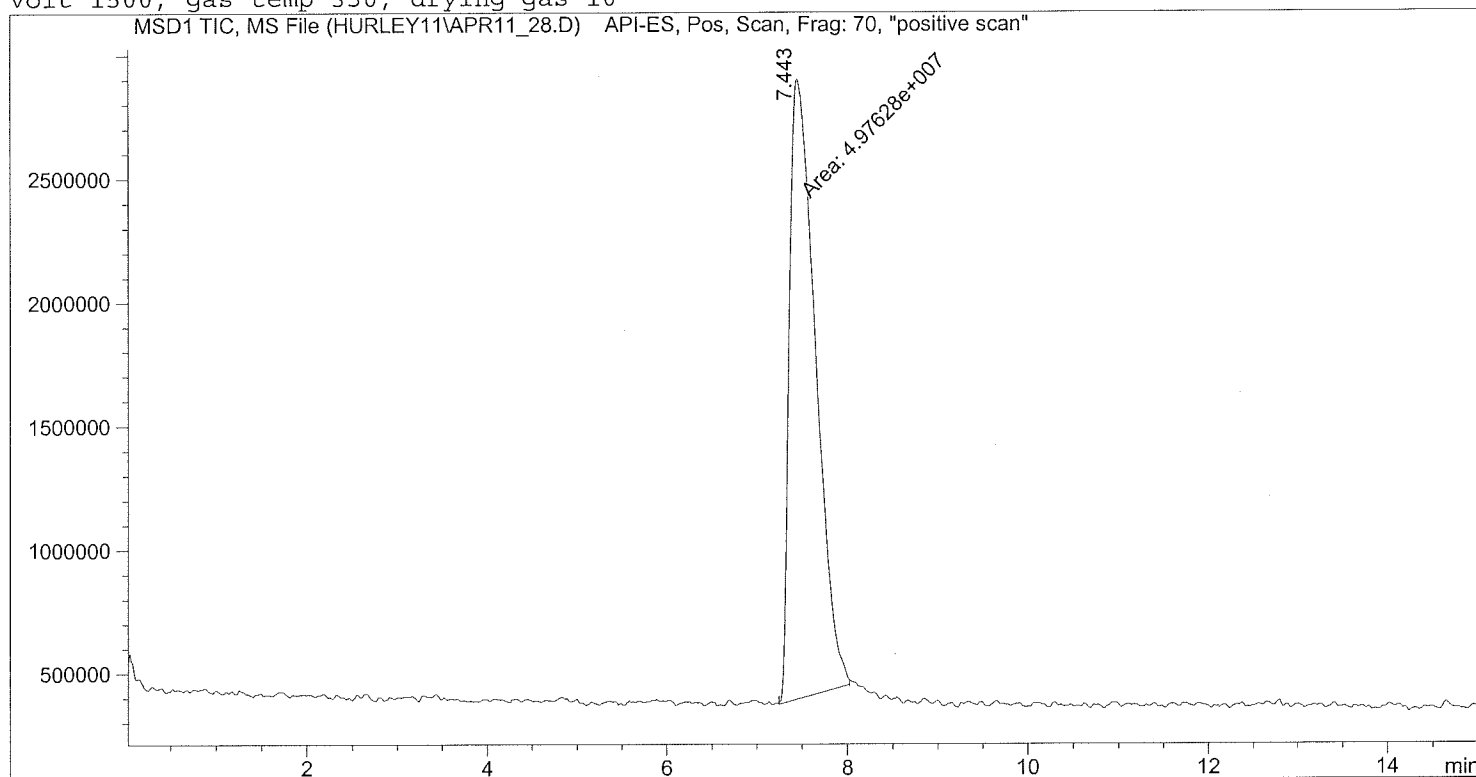

=====  
Area Percent Report  
=====

Sorted By : Signal  
Multiplier : 1.0000  
Dilution : 1.0000  
Use Multiplier & Dilution Factor with ISTDs

Signal 1: MSD1 TIC, MS File

| Peak # | RetTime [min] | Type | Width [min] | Area      | Height    | Area %   |
|--------|---------------|------|-------------|-----------|-----------|----------|
| 1      | 7.443         | MM   | 0.3303      | 4.97628e7 | 2.51123e6 | 100.0000 |

Totals : 4.97628e7 2.51123e6

=====  
\*\*\* End of Report \*\*\*

```
=====
Injection Date   : 4/11/2011 5:23:21 PM
Sample Name      : CV-GSA-02110
Acq. Operator    : Karen
Acq. Instrument  : Instrument 1
Method           : C:\HPCHEM\1\METHODS\LC_MS_UV.M
Last changed     : 4/11/2011 5:21:21 PM by Karen
Zorbax SB C18, 150 x 4.6, 3.5u,35/65/0.25,MeOH/water/formic, POS, 150-500; frag 70; 35C, cap
volt 1500, gas temp 350; drying gas 10
=====
```

Current Chromatogram(s)

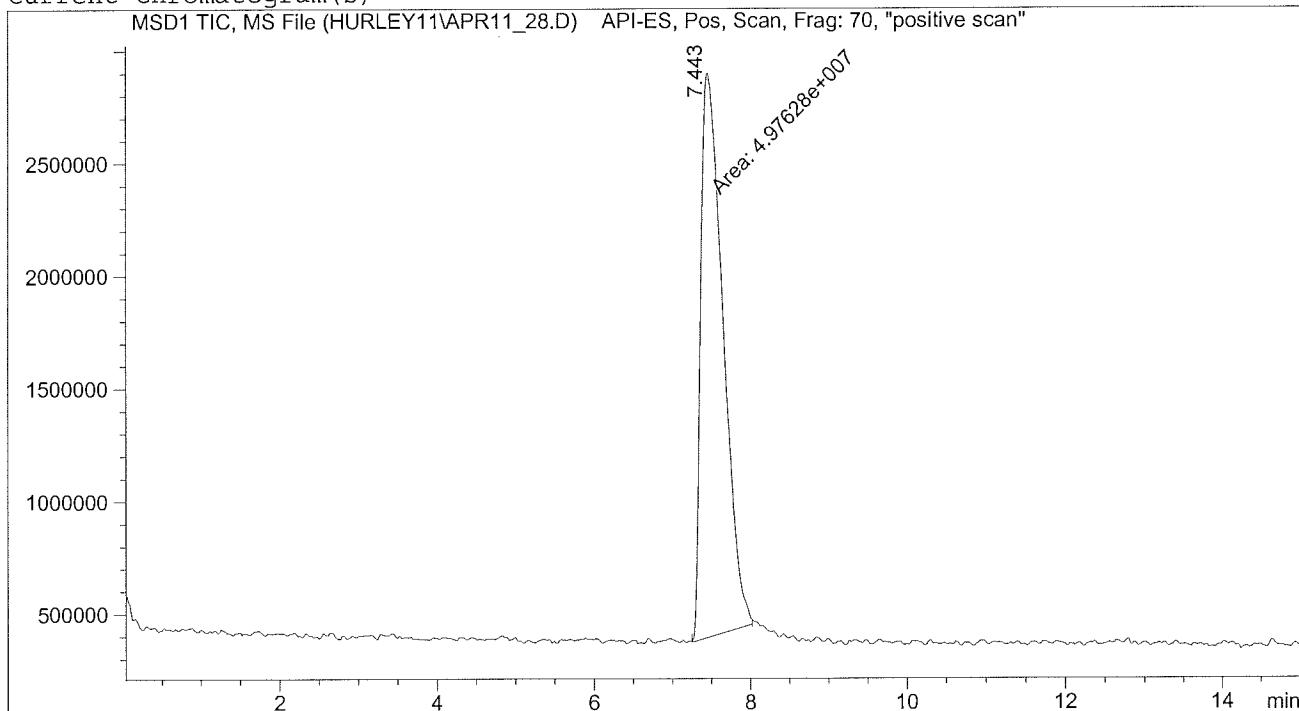

Apex Mass Spectrum of Peak 7.443 of APR11\_28.D

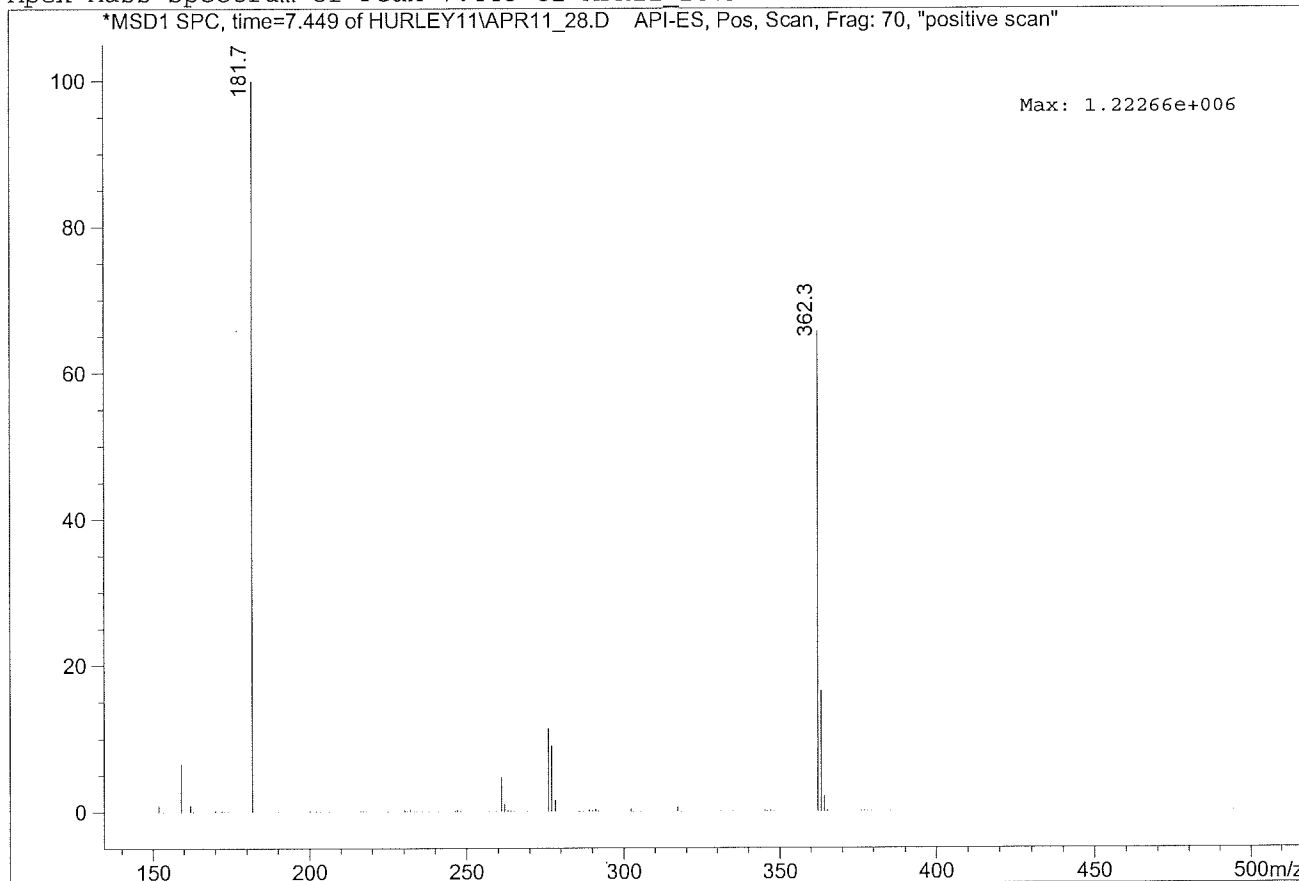

E:\MSLab\_LCQ\CV\_GSA\_02110  
V. R. Chappeta, MeOH:ACN  
CV\_GSA\_02110 #54-57 RT: 1.10-1.16 AV: 4 NL: 3.52E6  
T: + p Full ms [50.00-1000.00]

04/11/2011 05:21:29 PM

CV\_GSA\_02110

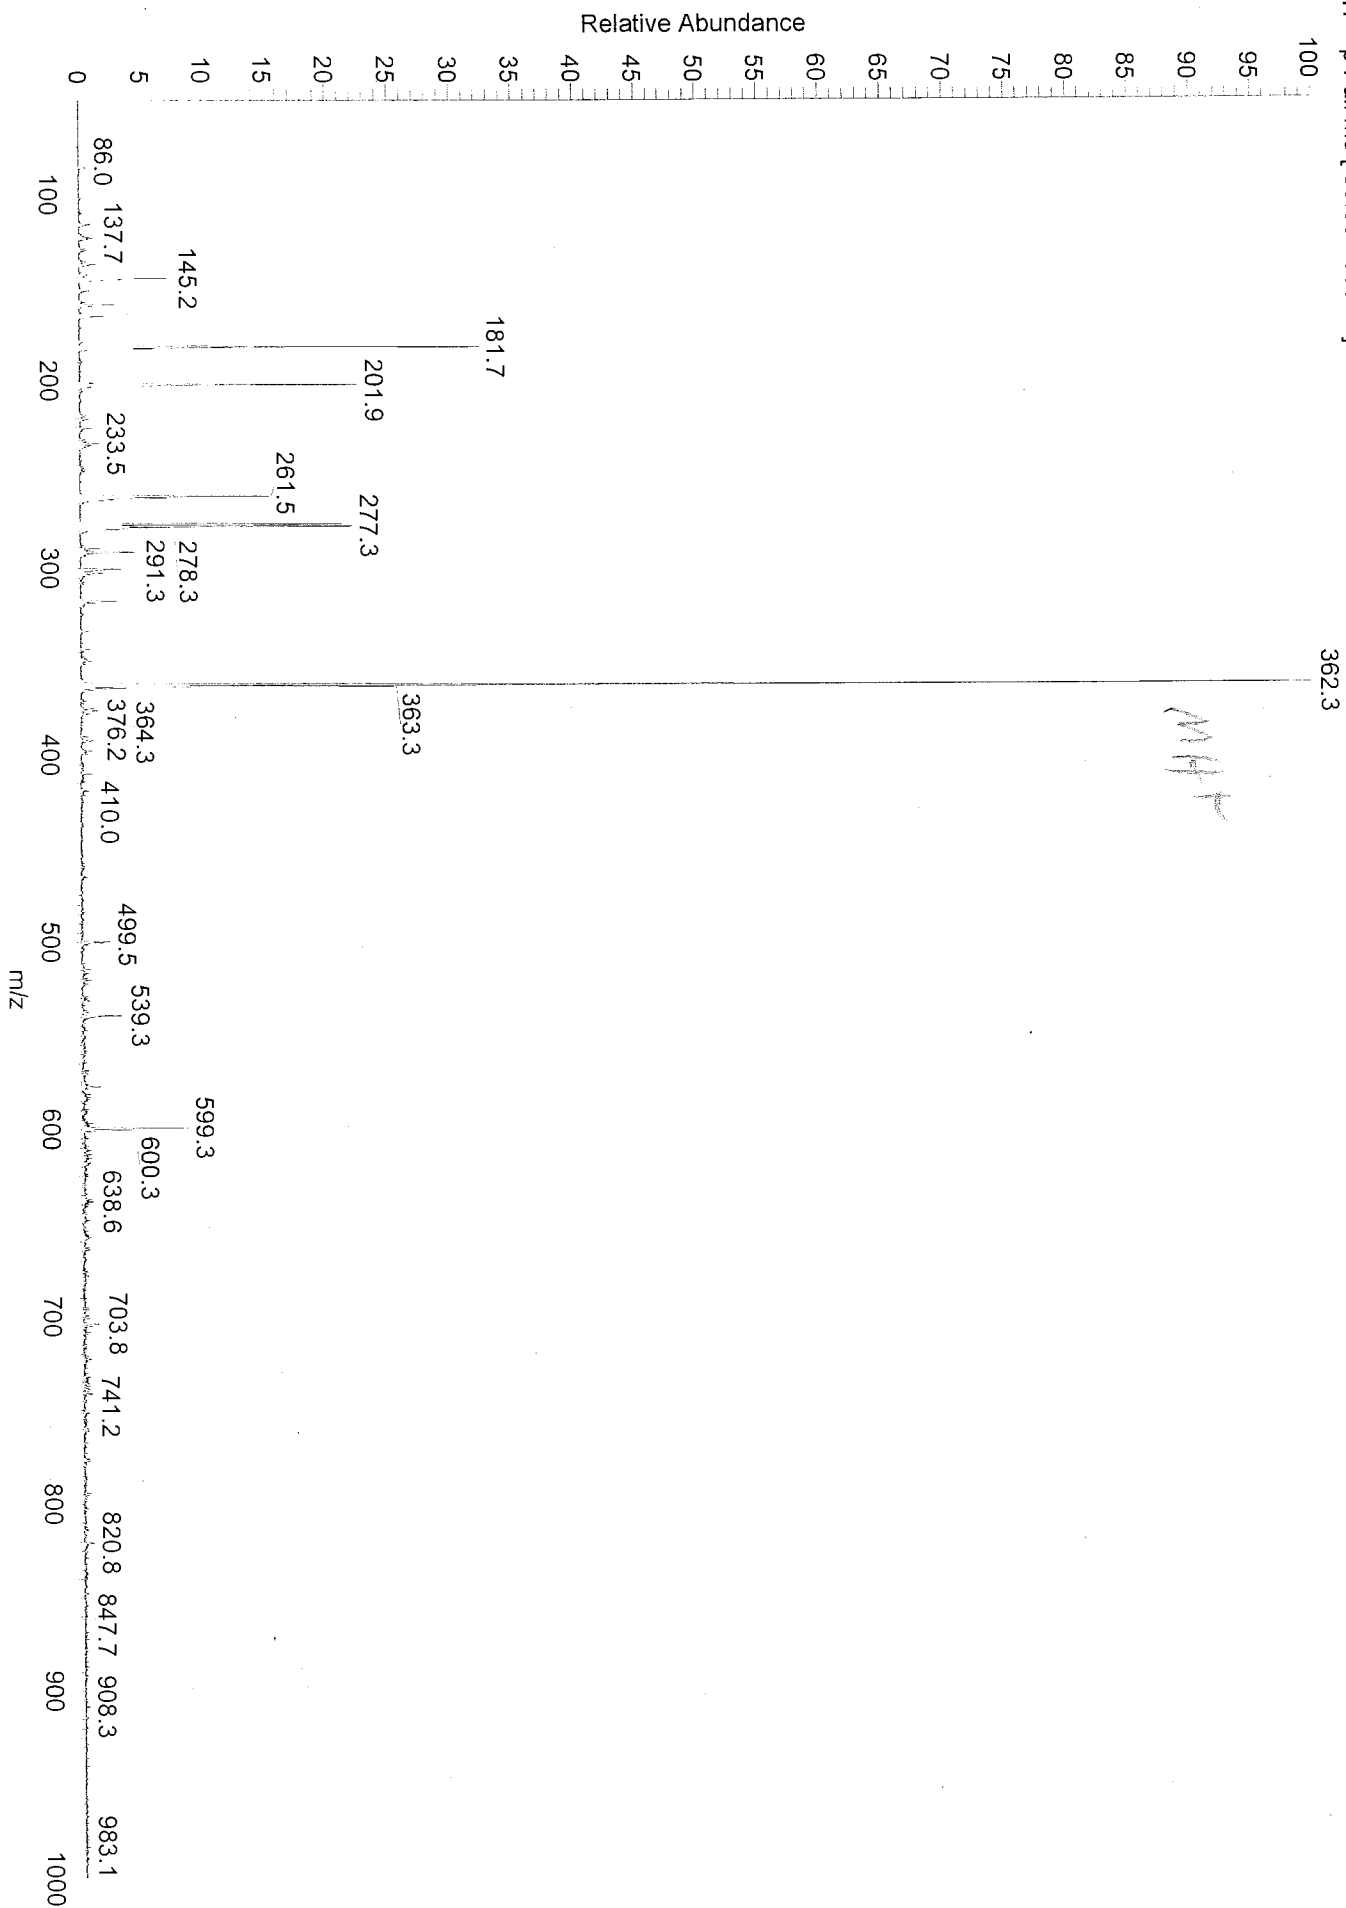

# Generic Display Report

## Analysis Info

Analysis Name D:\DATA\Facility\_Apr\_11\CV\_GSA\_02110\_000001.d  
Method ESI\_101506  
Sample Name CV\_GSA\_02110  
Comment V. Chappetta, positive mode, ACN:H2O

Acquisition Date 4/12/2011 10:49:42 AM

Operator  
Instrument apex-Ultra

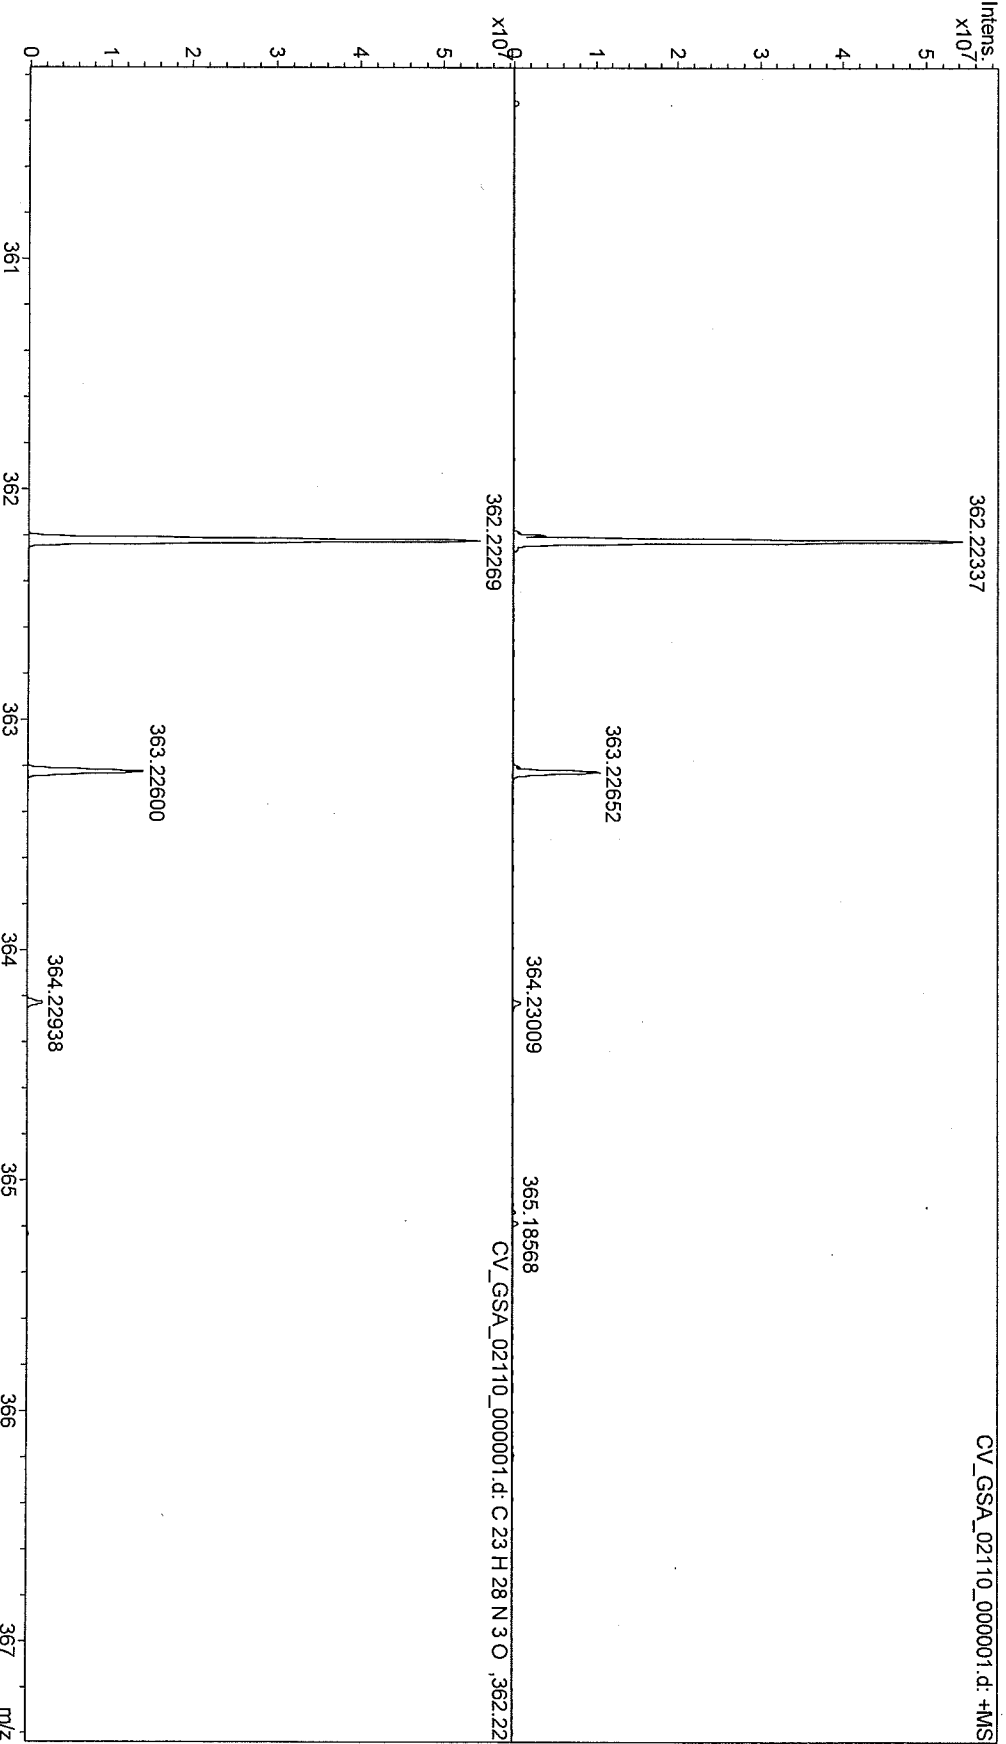



# SmartFormula Manually

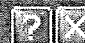

Min

C<sub>12</sub>

Generate

Max

C 12-n

Help

Note: for m < 2000 the elements C, H, N, and O are considered implicitly.

Measured m/z

362.22337

Tolerance

2

mDa

Charge

1

| Meas. m/z | # | Formula         | Score  | m/z       | err [mDa] | err [ppm] | mSigma | rdb  | e <sup>-</sup> Conf | N-Rule |
|-----------|---|-----------------|--------|-----------|-----------|-----------|--------|------|---------------------|--------|
| 362.22337 | 1 | C 23 H 28 N 3 O | 100.00 | 362.22269 | -0.7      | -1.9      | 36.8   | 11.5 | even                | ok     |

☐ Automatically locate monoisotopic peak

Maximum number of formulas

500

☒ Check rings plus double bonds

Minimum

-0.5

Maximum

40

Electron configuration

even

☒ Filter H/C element ratio

Minimum H/C

0

Maximum H/C

3

☒ Estimate carbon number

☒ Generate immediately

Show Pattern

Current Data Parameters  
 NAME VB-0317-DA  
 EXPNO 2  
 PROCNO 1

F2 - Acquisition Parameters  
 Date\_ 20110223  
 Time\_ 11.29

INSTRUM spect  
 PROBD 5 mm QNP 1H/1  
 PULPROG zg30  
 TD 65536  
 SOLVENT DMSO  
 NS 64  
 DS 2  
 SWH 6172.839 Hz  
 FIDRES 0.094190 Hz  
 AQ 5.308460 sec  
 RG 512  
 DW 81.000 usec  
 DE 6.00 usec  
 TE 300.0 K  
 D1 1.0000000 sec

===== CHANNEL f1 =====  
 NUC1 1H  
 P1 8.50 usec  
 PL 0.00 dB  
 SFO1 300.1318534 MHz

F2 - Processing parameters  
 SI 32768  
 SF 300.1300000 MHz  
 WDW EM  
 SSB 0  
 LB 0.30 Hz  
 GB 0  
 PC 1.00

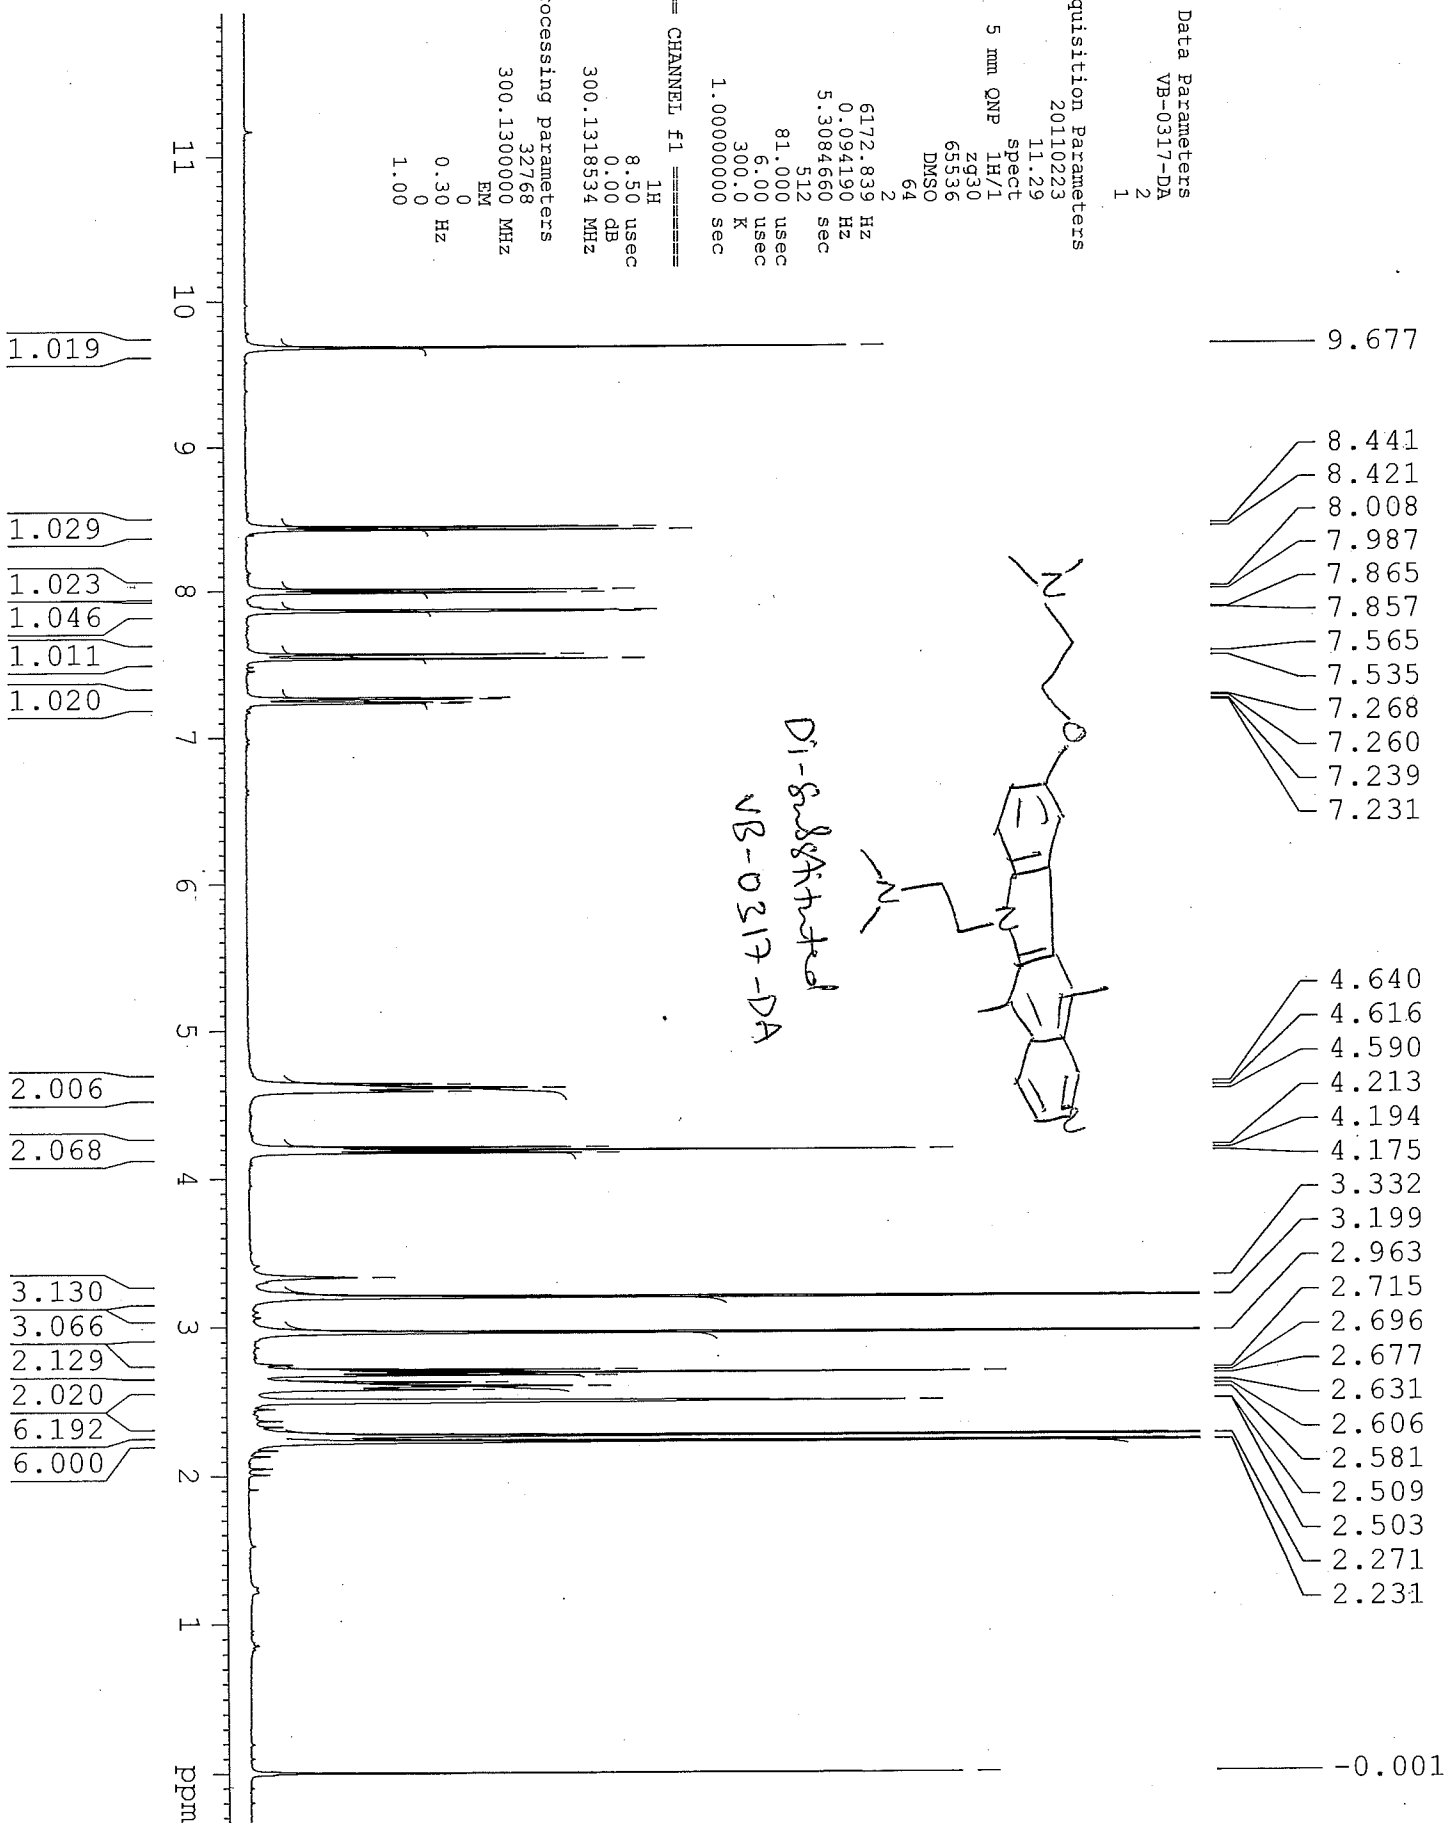

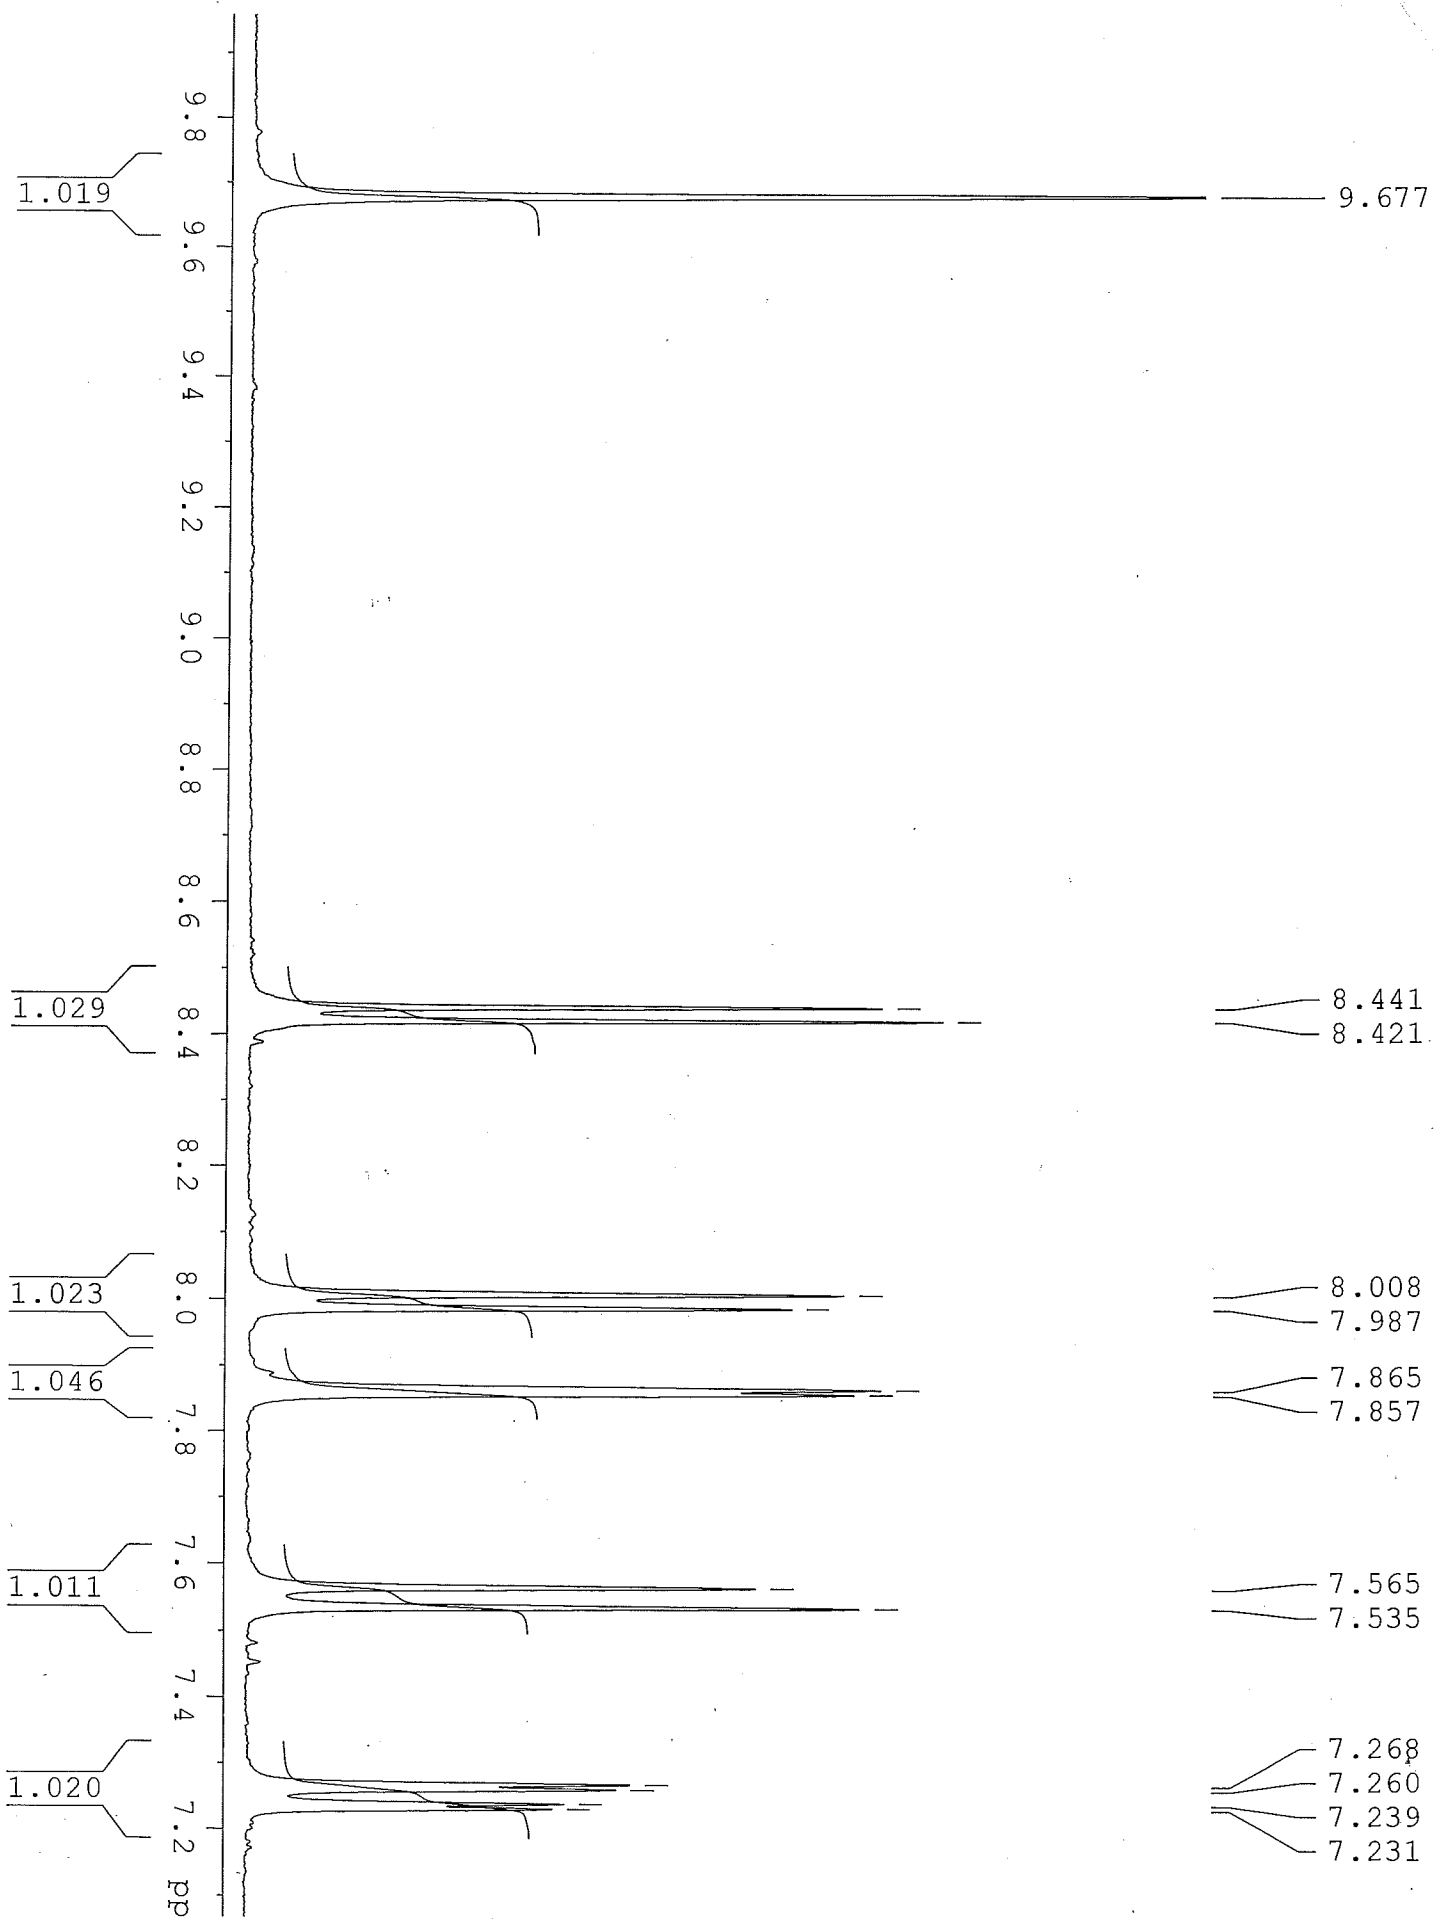

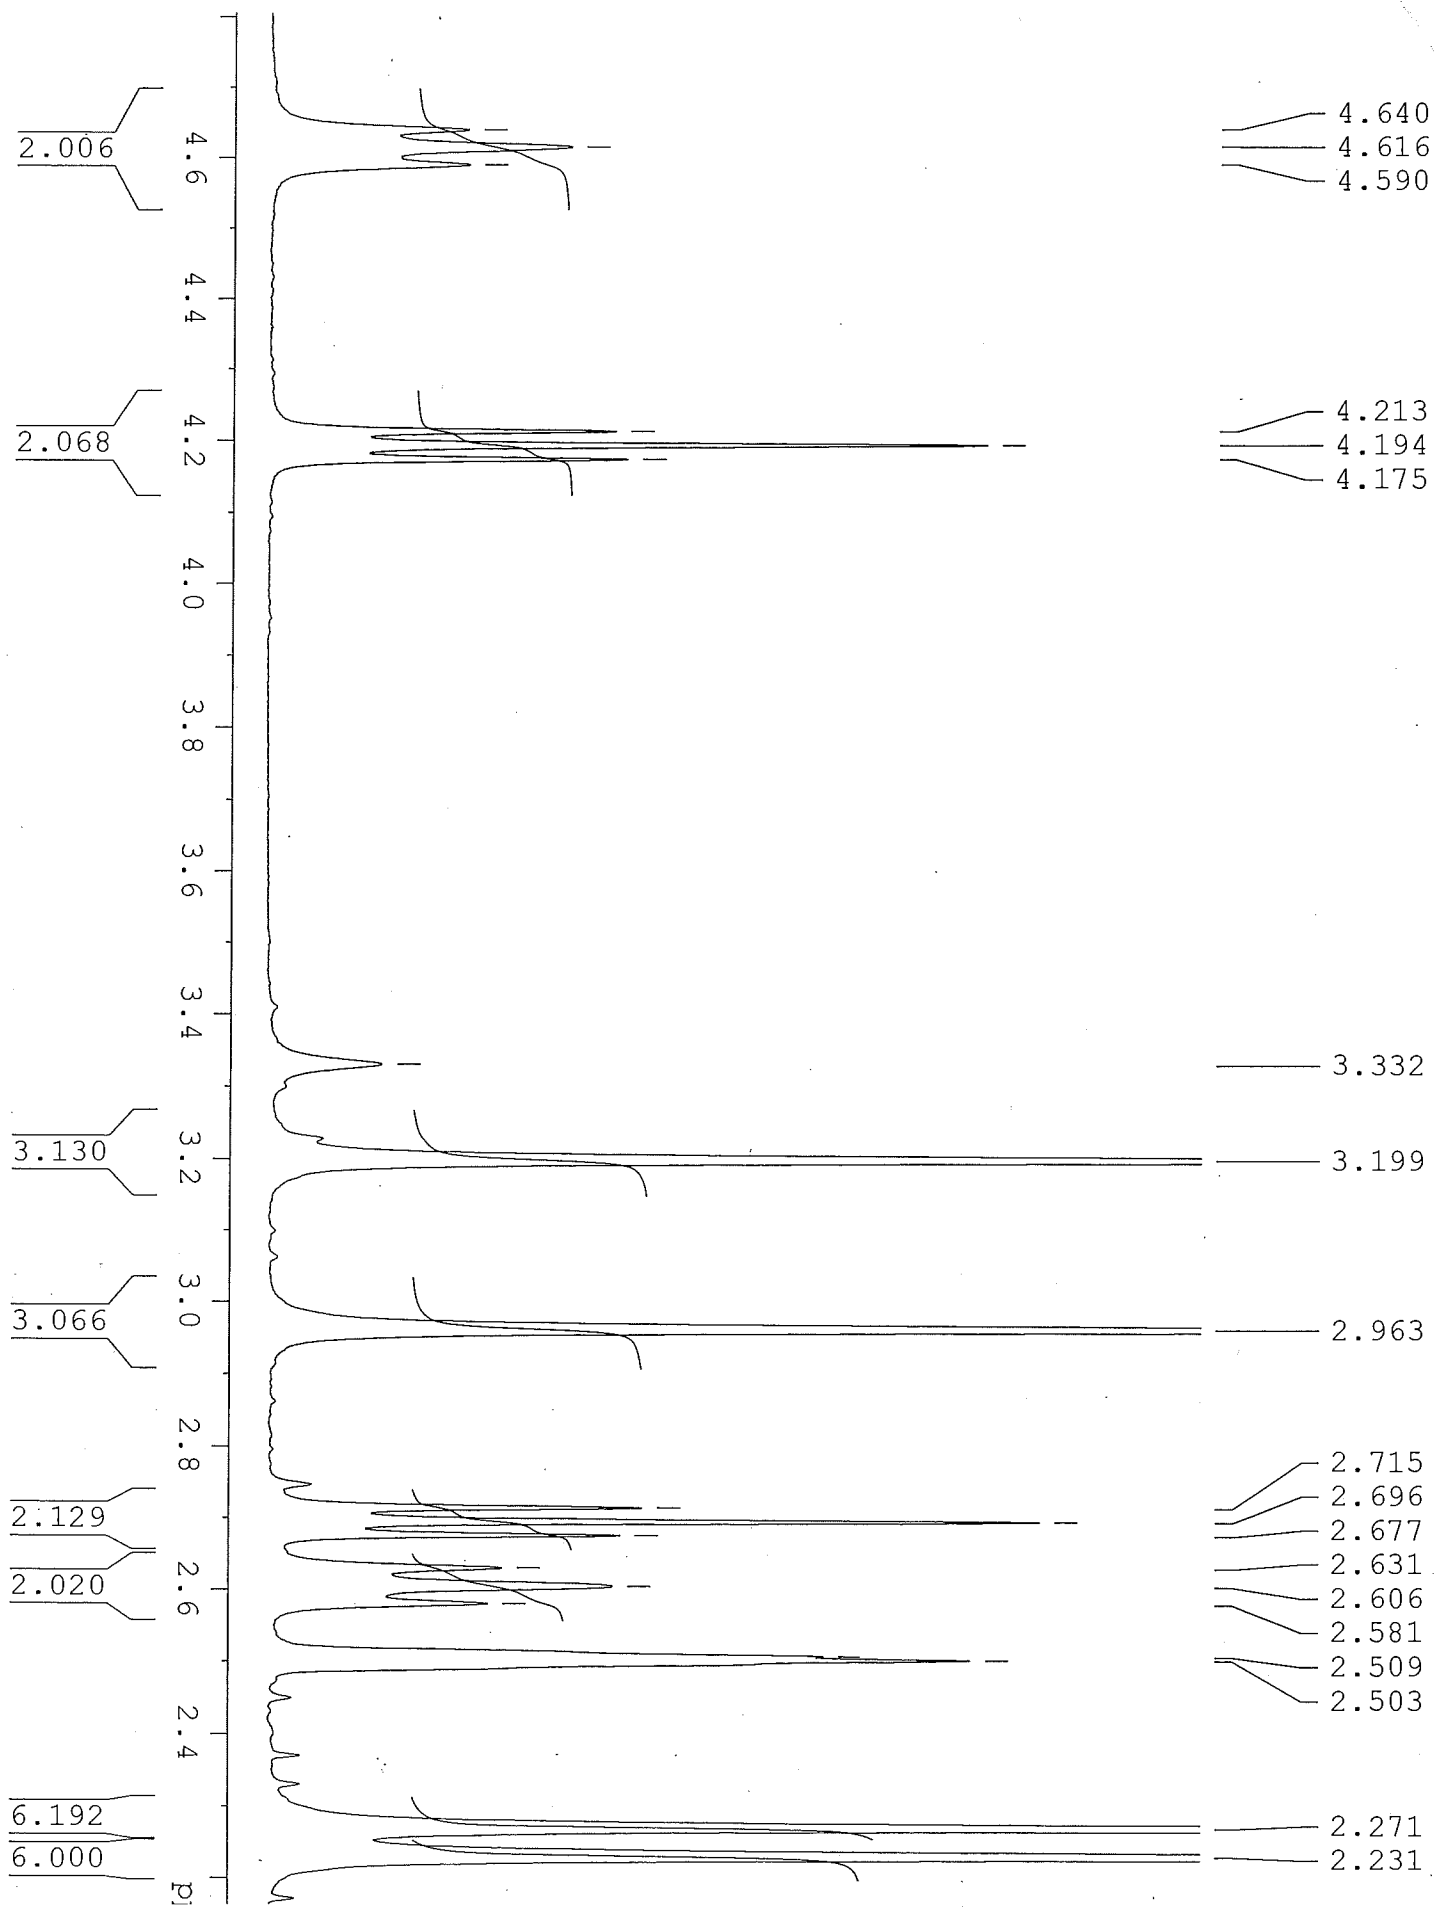

Current Data Parameters  
 NAME VB-0317-DA  
 EXENO 2  
 PROCNO 1

F2 - Acquisition Parameters  
 Date\_ 20110223  
 Time 13.28

INSTRUM spect  
 PROBD 5 mm QNP 1H/1  
 PULPROG zgpg30

TD 65536  
 SOLVENT CDCl3  
 NS 18000

DS 4  
 SMH 17985.611 Hz  
 FIDRES 0.274439 Hz

RG 1.8219508 sec  
 DW 812.7  
 DE 27.800 usec

TE 300.0 K  
 D1 2.00000000 sec  
 d11 0.03000000 sec  
 d12 0.00002000 sec

===== CHANNEL f1 =====  
 NUC1 13C  
 P1 6.00 usec  
 PL1 2.00 dB  
 SFO1 75.4752653 MHz

===== CHANNEL f2 =====  
 CPDPRG2 waltz16  
 NUC2 1H  
 PCDP2 80.00 usec  
 PL2 0.00 dB  
 PL12 19.47 dB  
 PL13 19.00 dB  
 SFO2 300.1312005 MHz

F2 - Processing parameters  
 SI 32768  
 SF 75.4677190 MHz  
 WDW EM  
 SSB 0  
 LB 1.00 Hz  
 GB 0  
 PC 1.00

153.629  
 150.505  
 141.778  
 141.661  
 139.813  
 134.462  
 129.551  
 125.013  
 124.218  
 122.823  
 116.745  
 116.408  
 110.683  
 109.922  
 109.367

67.600  
 58.873  
 46.539  
 46.516  
 44.810  
 41.222  
 40.944  
 40.666  
 40.387  
 40.109  
 39.831  
 39.552  
 15.242  
 13.903  
 0.966

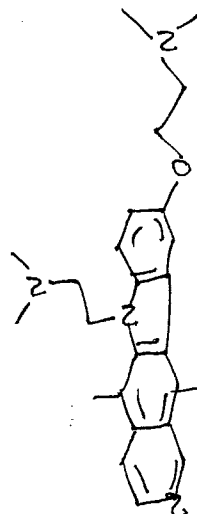

170 160 150 140 130 120 110 100 90 80 70 60 50 40 30 20 10 ppm

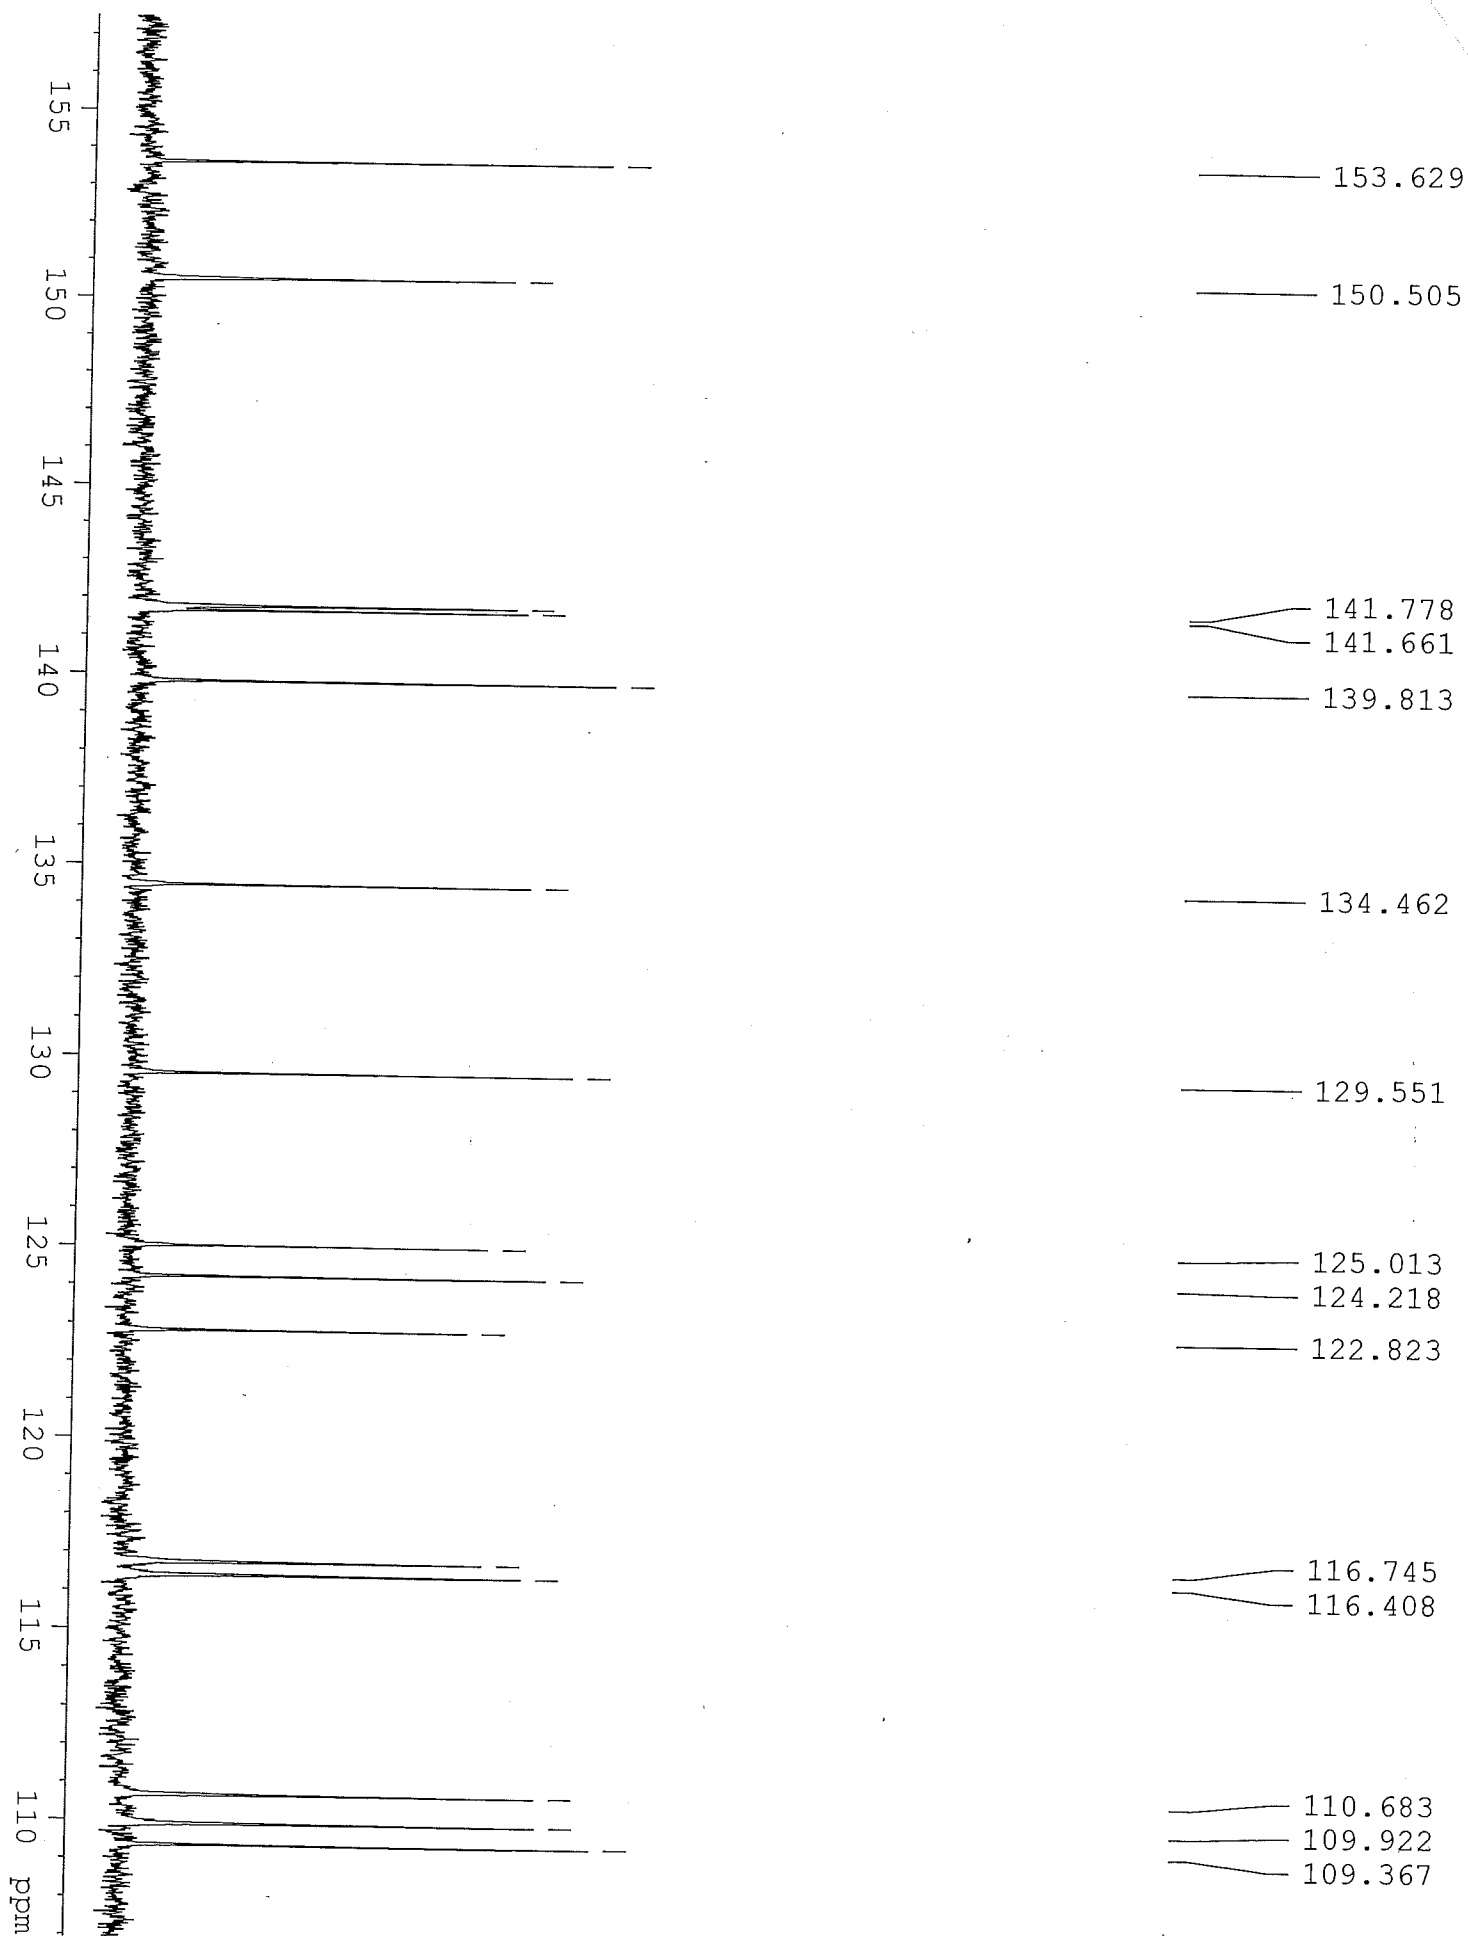

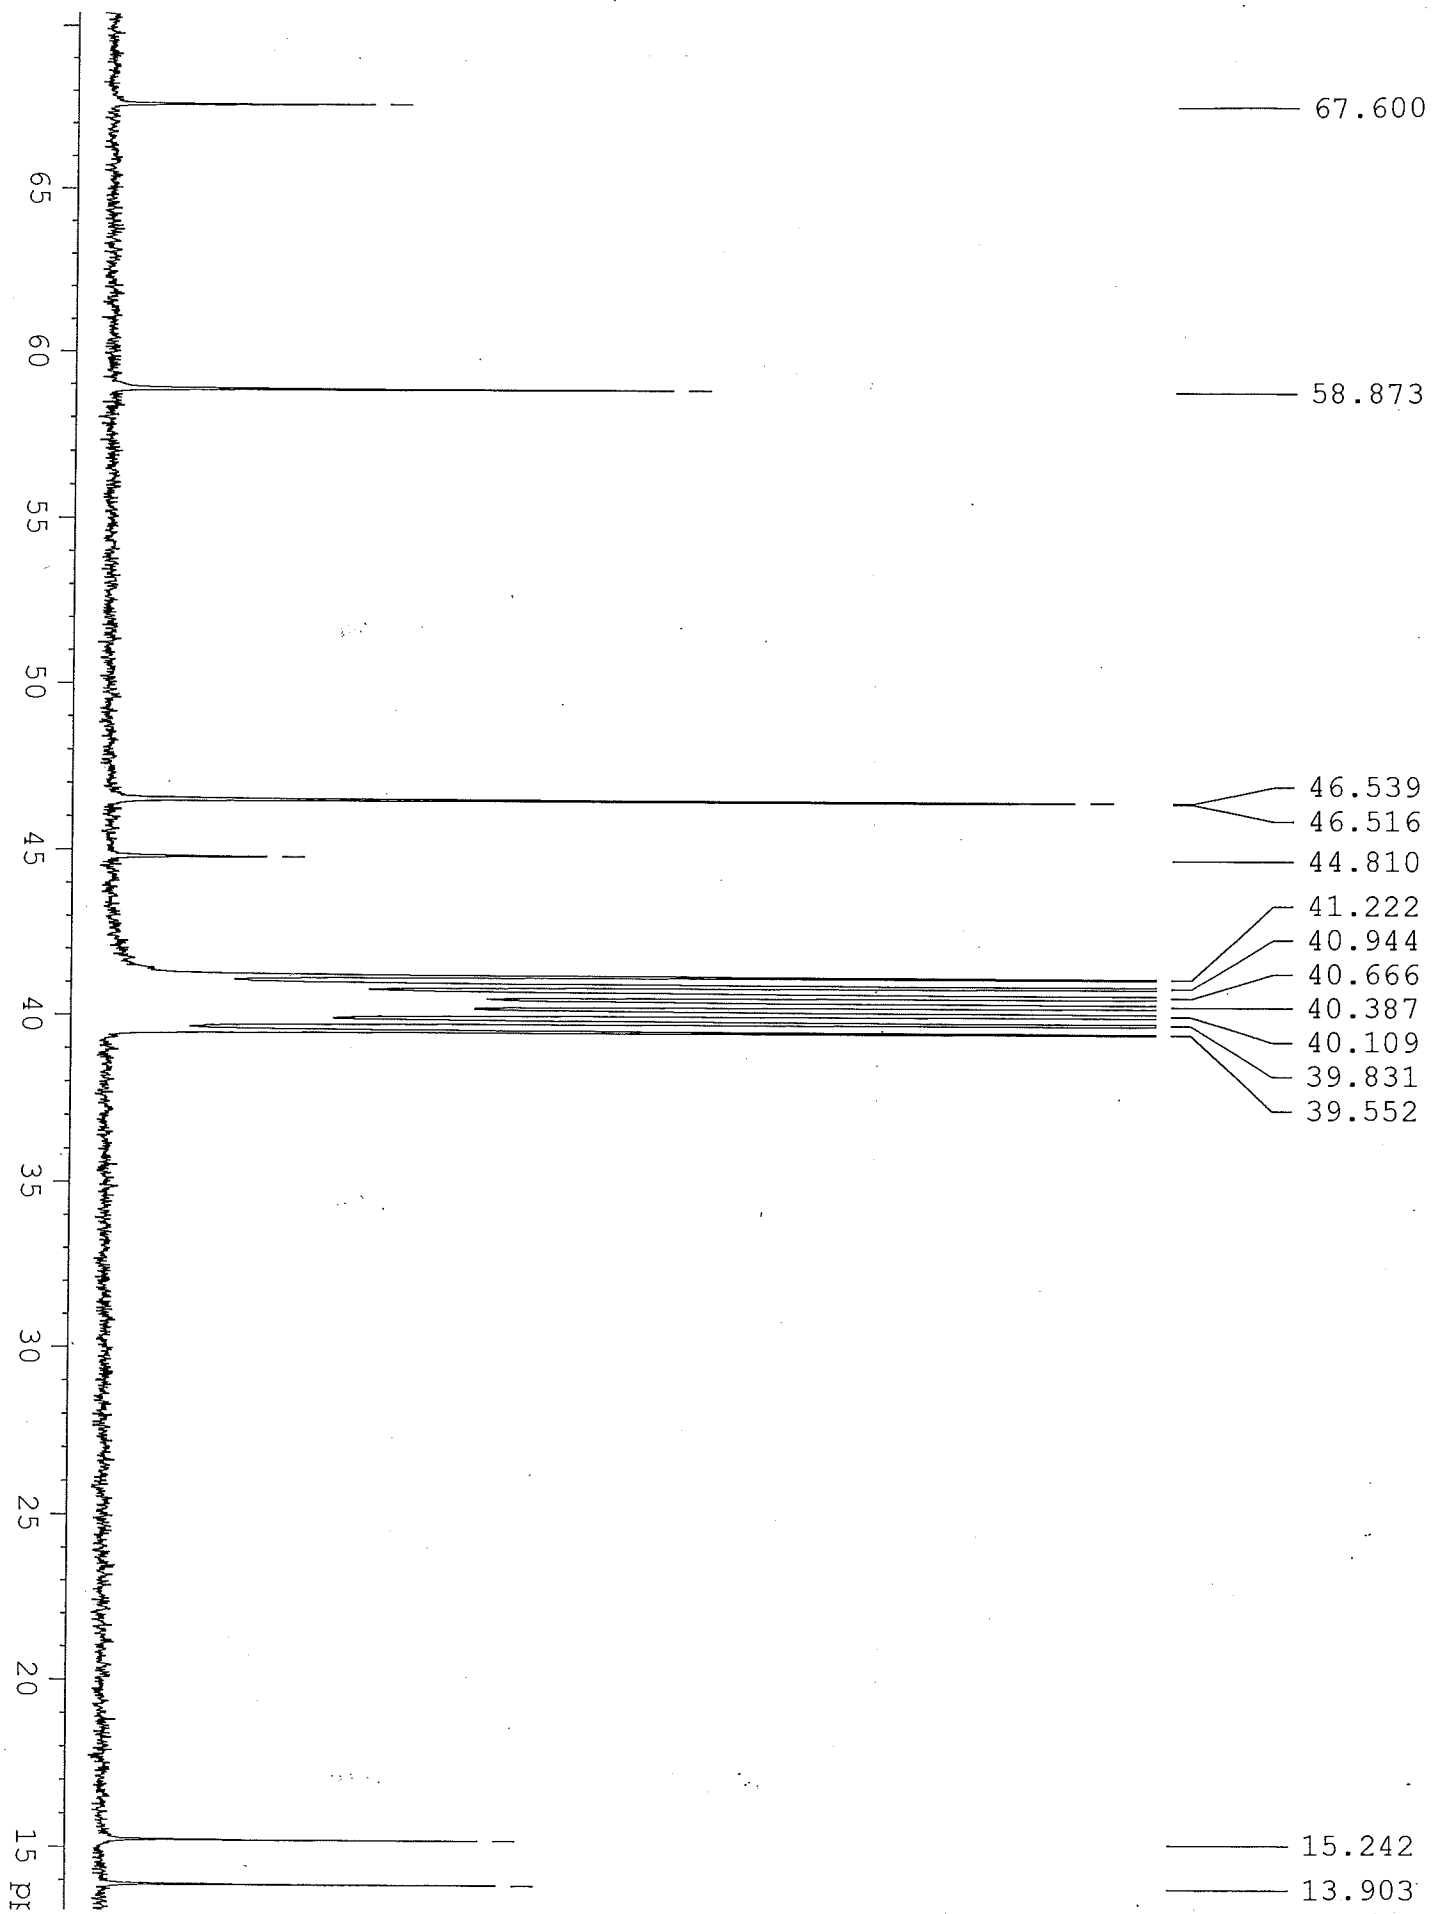

=====  
Injection Date : 2/22/2011 3:39:59 PM  
Sample Name : VB-GSA0316-DA-Y2 Location : Vial 6  
Acq. Operator : Karen Inj : 1  
Acq. Instrument : Instrument 1 Inj Volume : 0.1 µl  
Method : C:\HPCHEM\1\METHODS\LC\_MS\_UV.M  
Last changed : 2/22/2011 2:45:41 PM by Karen  
Zorbax SB C18, 150 x 4.6, 3.5µ, 17/83/0.25, MeOH/water/formic, POS, 150-500; frag 70; 35C, cap  
volt 2500, gas temp 325; drying gas 10  
=====

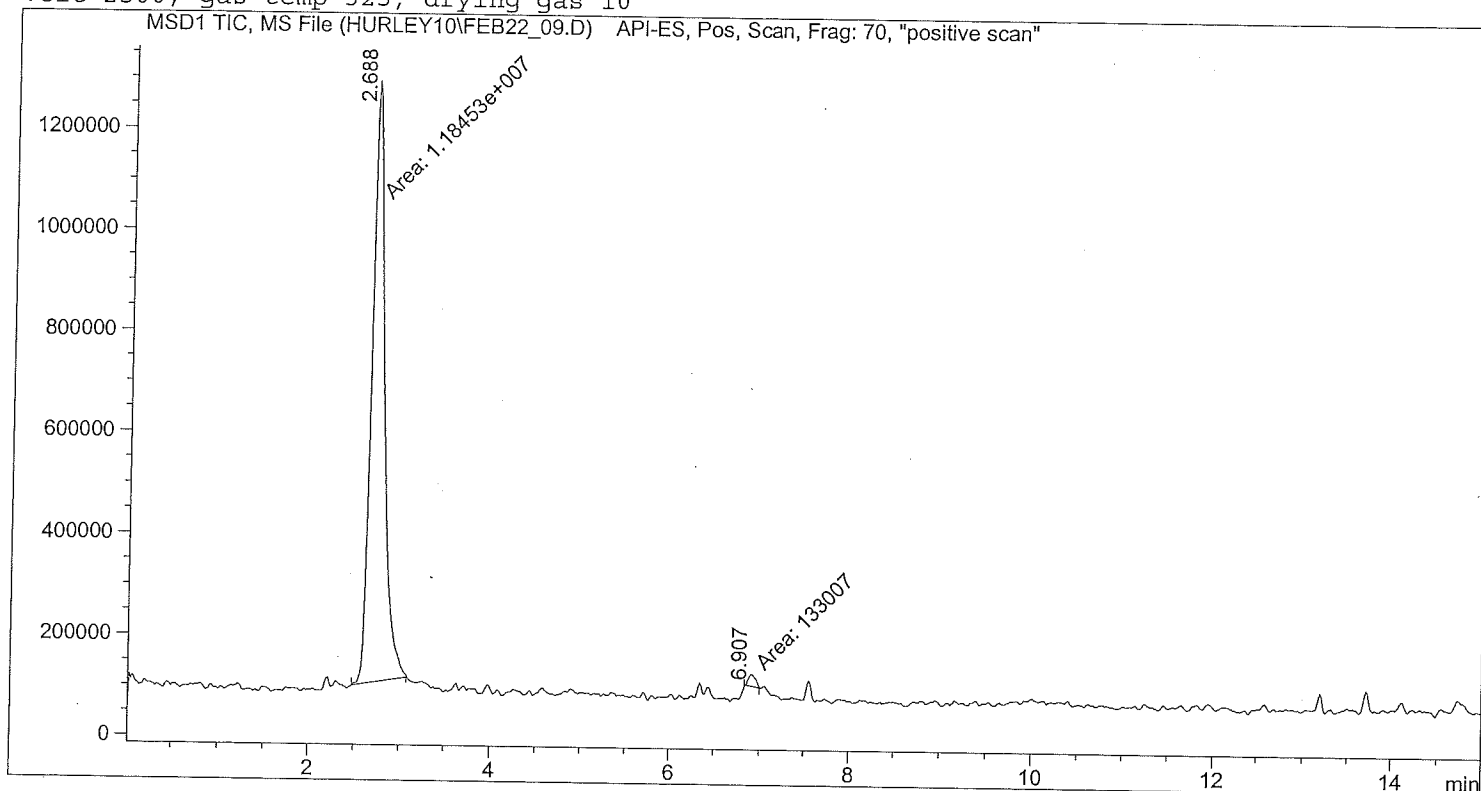

=====  
Area Percent Report  
=====

Sorted By : Signal  
Multiplier : 1.0000  
Dilution : 1.0000  
Use Multiplier & Dilution Factor with ISTDs

Signal 1: MSD1 TIC, MS File

| Peak # | RetTime [min] | Type | Width [min] | Area      | Height    | Area %  |
|--------|---------------|------|-------------|-----------|-----------|---------|
| 1      | 2.688         | MM   | 0.1654      | 1.18453e7 | 1.19327e6 | 98.8896 |
| 2      | 6.907         | MM   | 0.0928      | 1.33007e5 | 2.38938e4 | 1.1104  |

Totals : 1.19783e7 1.21717e6

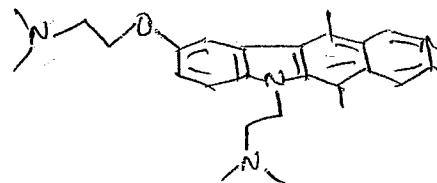

VB-0317-DA

Di-substituted

=====  
\*\*\* End of Report \*\*\*  
=====



all graphic windows

=====  
ion Date : 2/22/2011 3:39:59 PM  
e Name : VB-GSA0316-DA-Y2 Location : Vial 6  
Operator : Karen Inj : 1  
Instrument : Instrument 1 Inj Volume : 0.1  $\mu$ l  
Method : C:\HPCHEM\1\METHODS\LC\_MS\_UV.M  
Last changed : 2/22/2011 2:45:41 PM by Karen  
Agilent 1100B, Agilent SB C18, 150 x 4.6, 3.5 $\mu$ m, 17/83/0.25, MeOH/water/formic, POS, 150-500; frag 70; 35C, cap  
voltage 2500, gas temp 325; drying gas 10

Current Chromatogram(s)

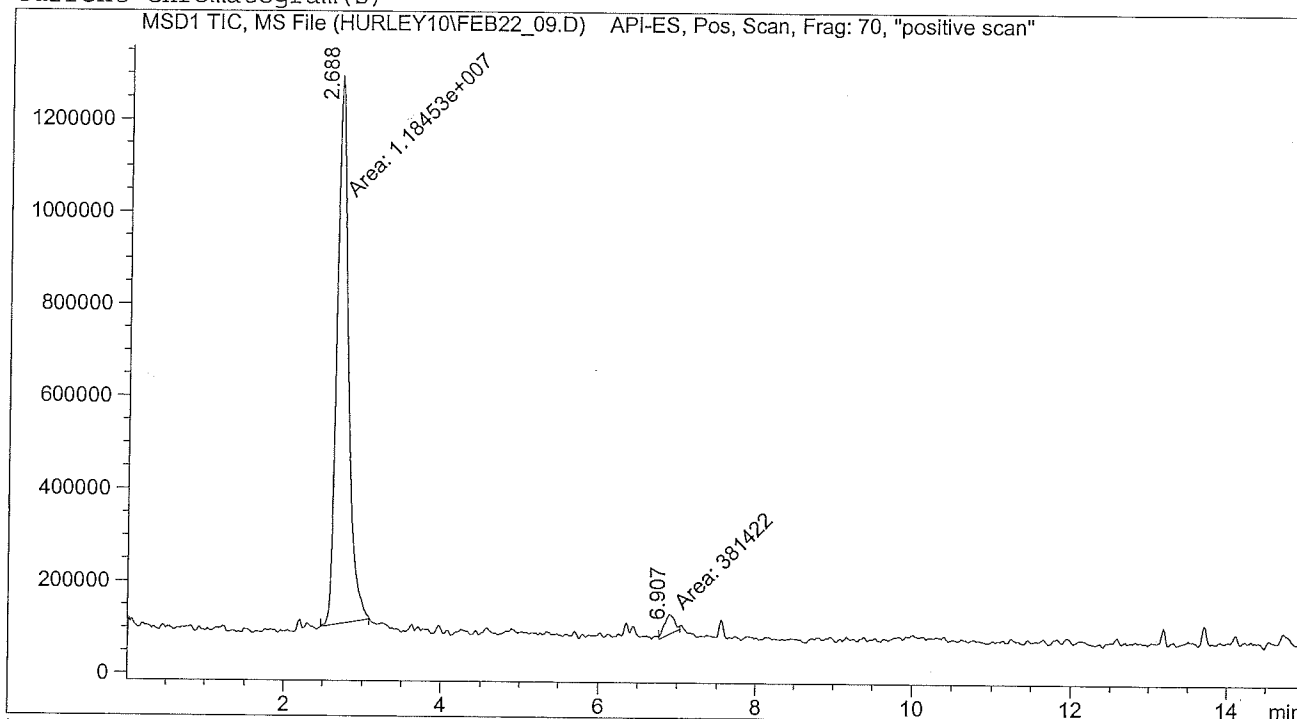

MS Spectrum

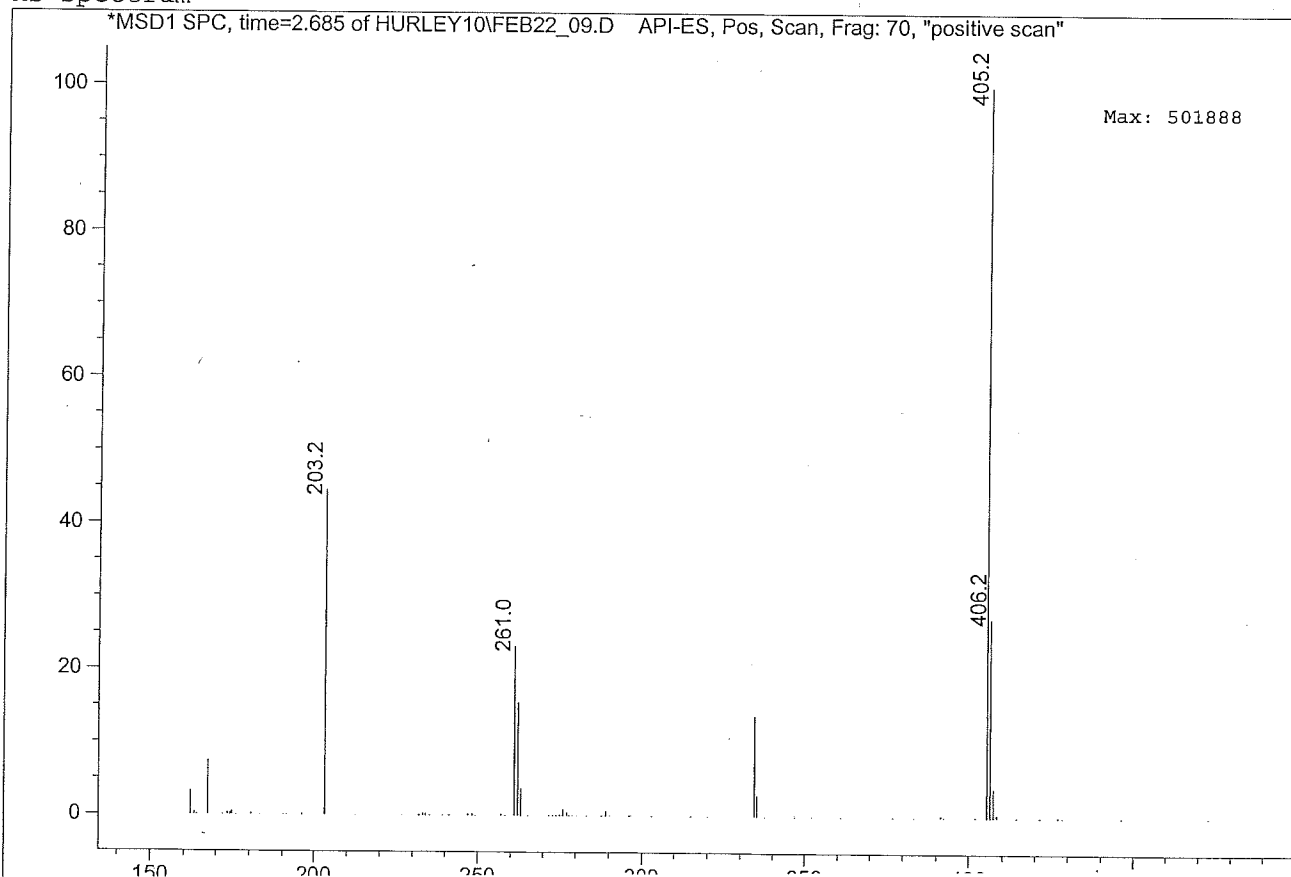

all graphic windows

=====  
ion Date : 2/22/2011 3:39:59 PM  
Sample Name : VB-GSA0316-DA-Y2 Location : Vial 6  
Operator : Karen Inj : 1  
Instrument : Instrument 1 Inj Volume : 0.1  $\mu$ l  
Method : C:\HPCHEM\1\METHODS\LC\_MS\_UV.M  
Last changed : 2/22/2011 2:45:41 PM by Karen  
Corbax SB C18, 150 x 4.6, 3.5u, 17/83/0.25, MeOH/water/formic, POS, 150-500; frag 70; 35C,  
cap volt 2500, gas temp 325; drying gas 10

Current Chromatogram(s)

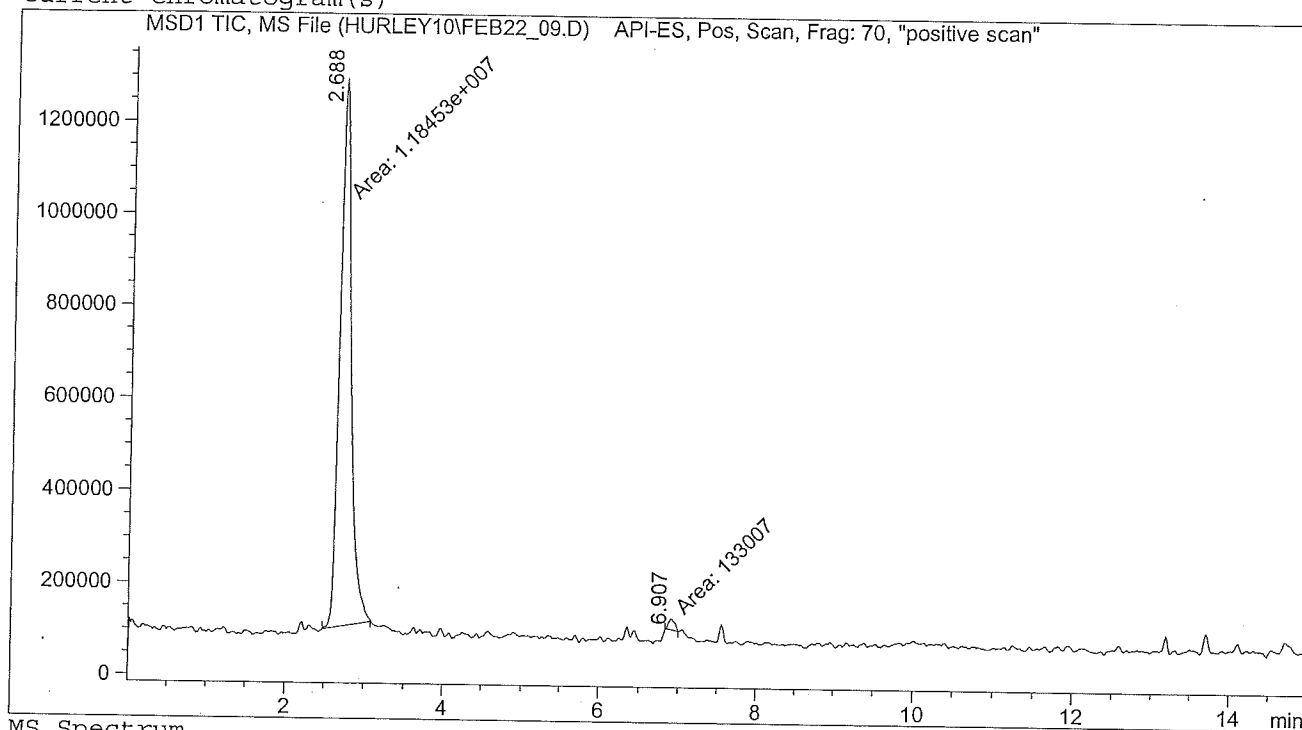

MS Spectrum

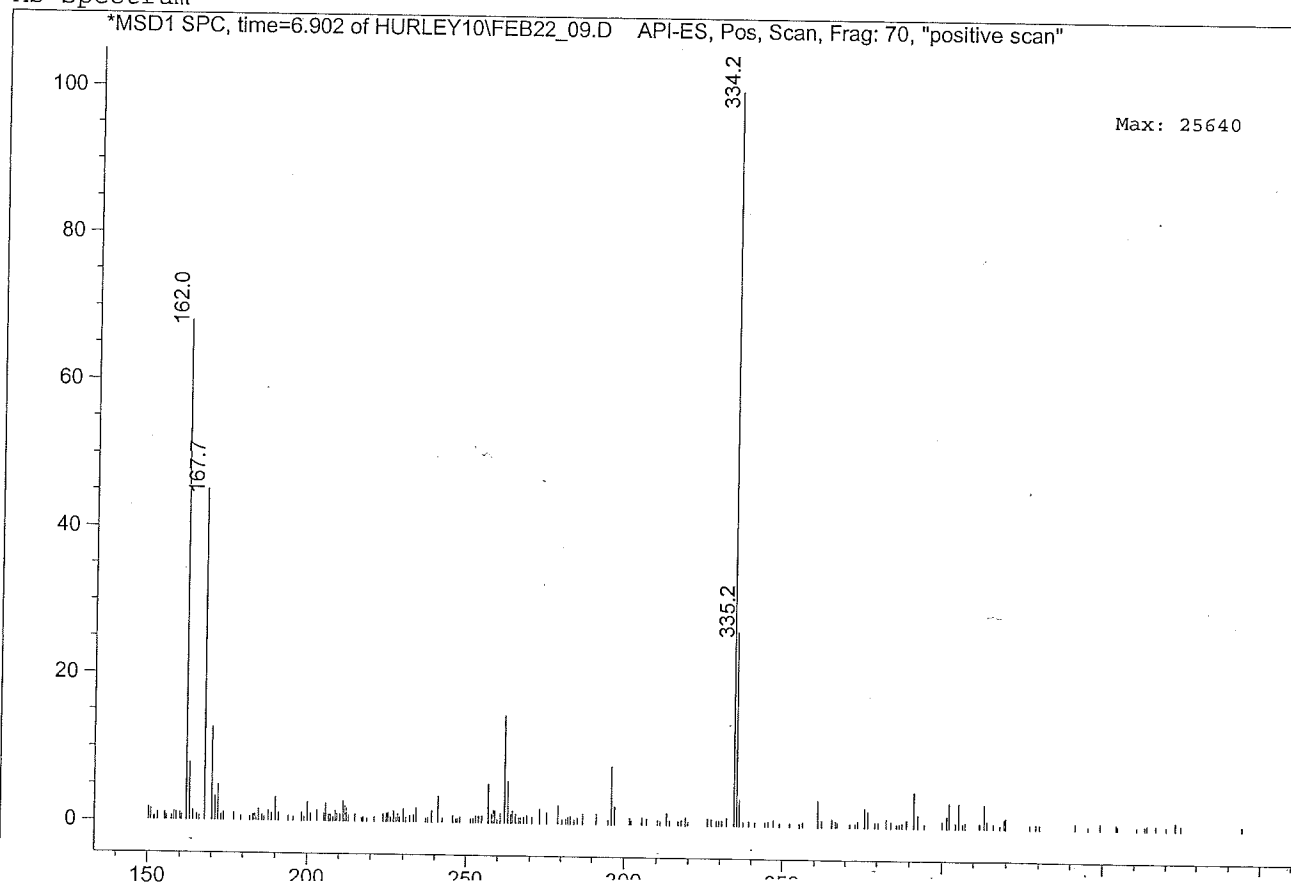

# Generic Display Report

## Analysis Info

Analysis Name  
Method  
Sample Name  
Comment

D:\DATA\Facility\_Feb\_11\VB\_0317\_DA\_000001.d  
ESL\_101506  
VB\_0317\_DA  
Venkat B., positive mode, ACN:MeOH

Acquisition Date

2/25/2011 10:08:14 AM

Operator

Instrument

apex-Ultra

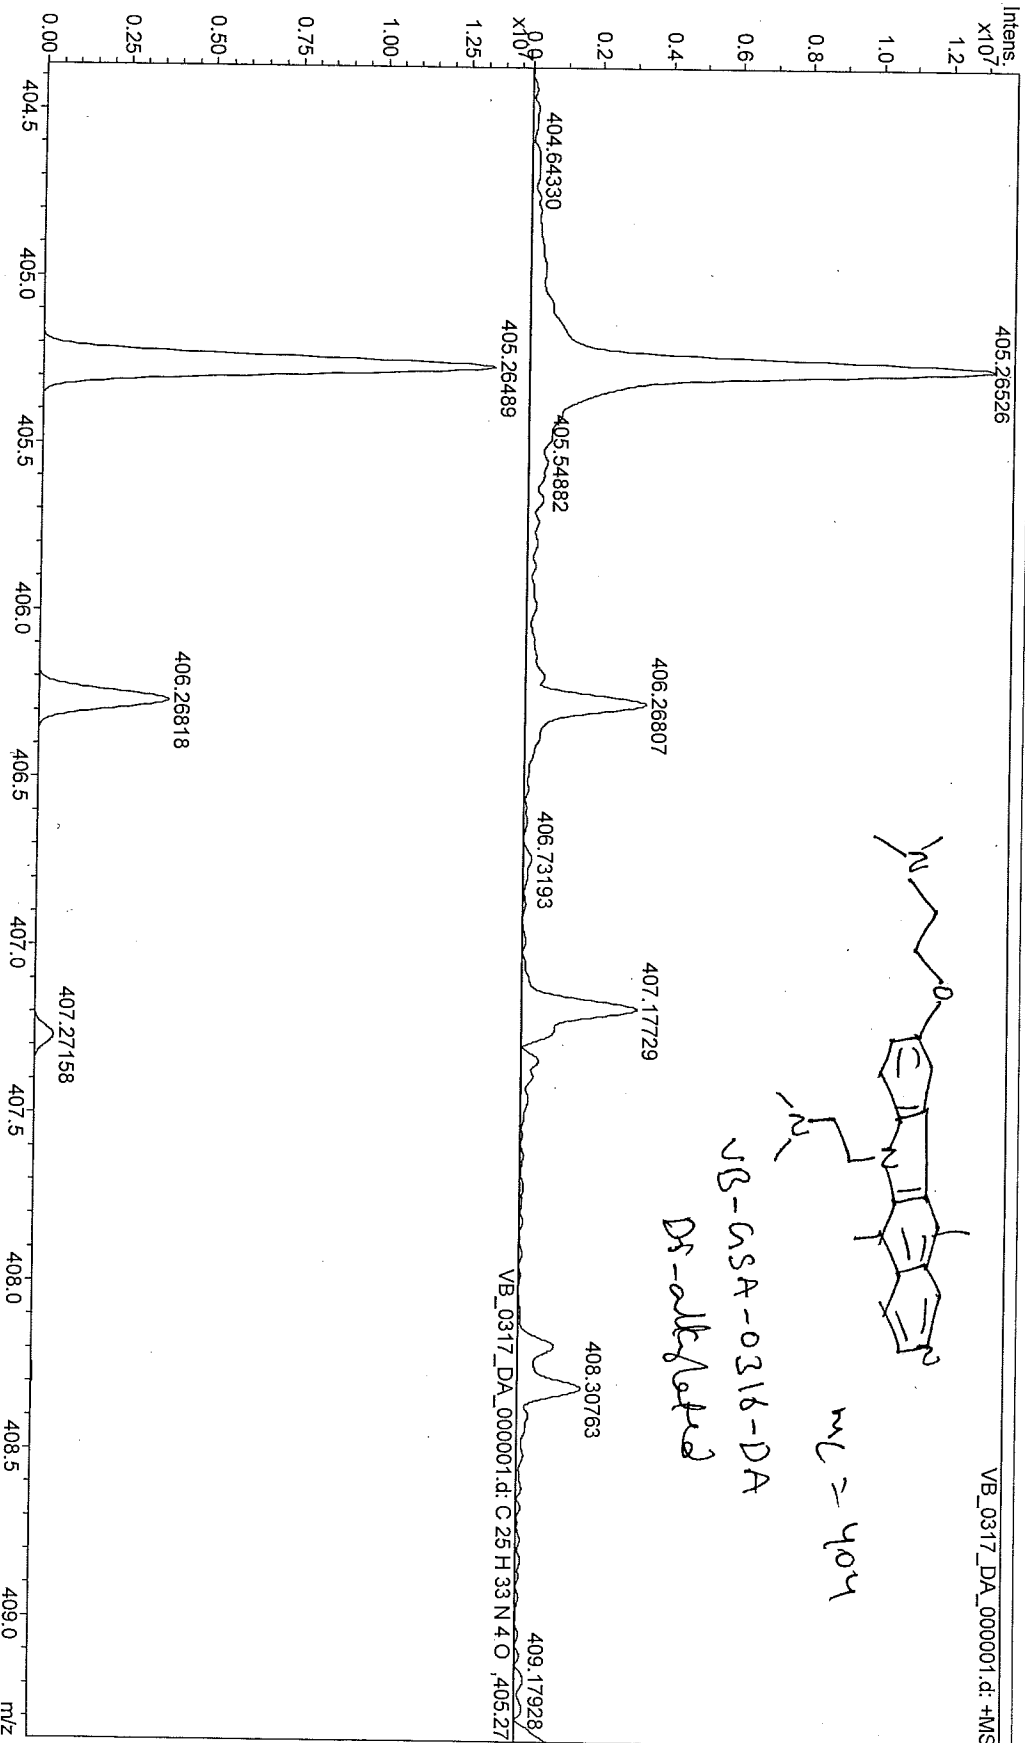

# SmartFormula Manually

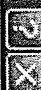

Min

C<sub>17</sub>H<sub>30</sub>N<sub>3</sub>O<sub>1</sub>

Generate

Max

C 17-n, H 30-n, N 3-n, O 1-n

Help

Note: for m < 2000 the elements C, H, N, and O are considered implicitly.

Measured m/z 405.26526

Tolerance 5

ppm

Charge

1

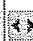

| Meas. m/z | # | Formula                                          | Score  | m/z       | err [mDa] | err [ppm] | mSigma | rdB  | e <sup>-</sup> Conf | N-Rule |
|-----------|---|--------------------------------------------------|--------|-----------|-----------|-----------|--------|------|---------------------|--------|
| 405.26526 | 1 | C <sub>25</sub> H <sub>33</sub> N <sub>4</sub> O | 100.00 | 405.26489 | -0.4      | -0.9      | 28.6   | 11.5 | even                | ok     |

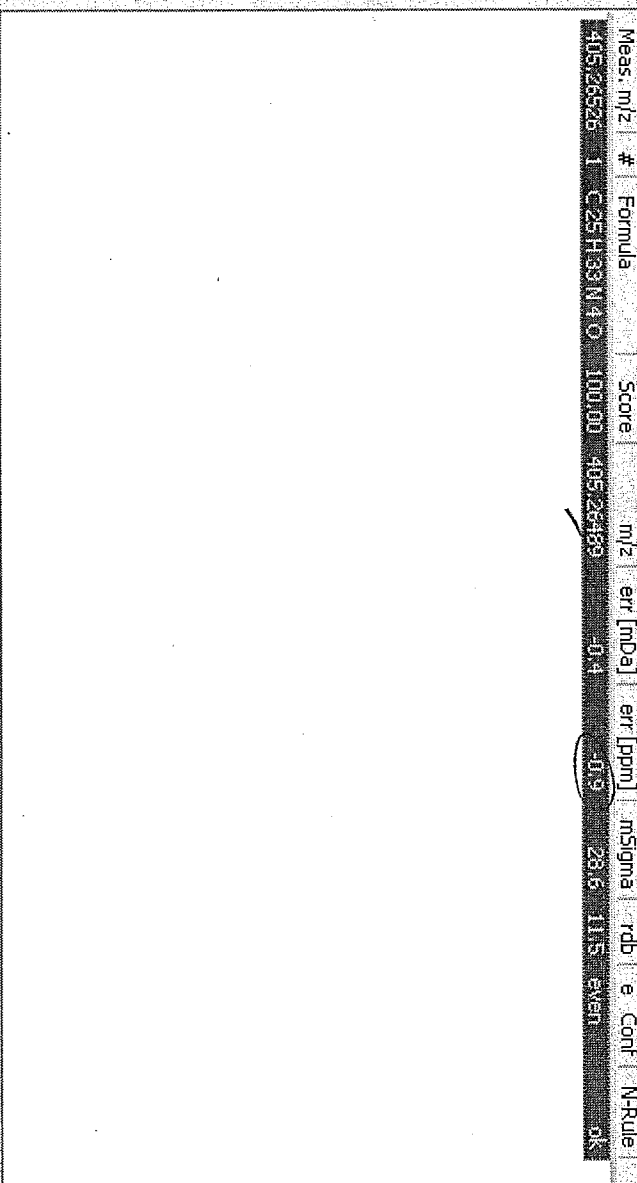

☐ Automatically locate monoisotopic peak

Maximum number of formulas 500

☒ Check rings plus double bonds

Minimum -0.5 Maximum 40

Electron configuration

even

☒ Filter H/C element ratio

Minimum H/C 0 Maximum H/C 3

☒ Estimate carbon number

☒ Generate immediately

Show Pattern

9.696

8.512  
8.492  
7.911  
7.899  
7.435  
7.405  
7.281  
7.221  
7.214  
7.191  
7.185

4.630  
4.607  
4.582  
4.065  
3.982

3.248  
2.988  
2.553  
2.531  
2.507  
2.140  
2.116  
2.093  
2.068  
2.044  
1.825

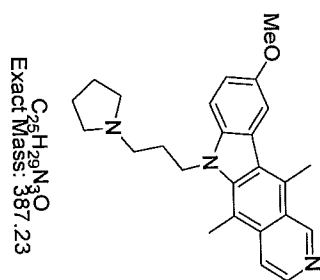

1.000

1.065

2.174

1.174

1.063

2.167

3.226

3.369

3.241

6.426

2.326

4.265

Current Data Parameters  
 NAME CV-GSA-02112  
 EXPNO 1  
 PROCNO 1

F2 - Acquisition Parameters  
 Date\_ 20110422  
 Time 16.38  
 INSTRUM spect  
 PROBD 5 mm QNP 1H/1  
 PULPROG zg30  
 TD 65536  
 SOLVENT CDCl3  
 NS 16  
 DS 2  
 SWH 6172.839 Hz  
 FIDRES 0.094190 Hz  
 AQ 5.3084660 sec  
 RG 456.1  
 DE 81.000 usec  
 TE 300.0 K  
 D1 1.00000000 sec

===== CHANNEL f1 =====  
 NUC1 1H  
 P1 8.50 usec  
 PL1 0.00 dB  
 SFO1 300.1318534 MHz

F2 - Processing parameters  
 SI 32768  
 SF 300.1300000 MHz  
 WDW EM  
 SSB 0  
 LB 0.30 Hz  
 GB 0  
 PC 1.00

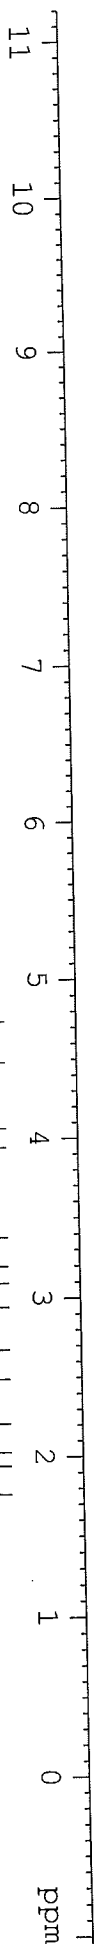

9.696

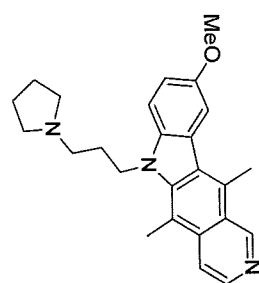

C<sub>25</sub>H<sub>28</sub>N<sub>3</sub>O  
Exact Mass: 387.23

8.512  
8.492

7.911  
7.899

7.435  
7.405  
7.281  
7.221  
7.214  
7.191  
7.185

Current Data Parameters  
NAME CV-GSA-02112  
EXPNO 1  
PROCNO 1

F2 - Acquisition Parameters  
Date\_ 20110422  
Time 16.38  
INSTRUM spect  
PROBHD 5 mm QNP 1H/1  
PULPROG zg30  
TD 65536  
SOLVENT CDCl3  
NS 16  
DS 2  
SWH 6172.839 Hz  
FIDRES 0.094190 Hz  
AQ 5.3084660 sec  
RG 456.1  
DW 81.000 usec  
DE 6.00 usec  
TE 300.0 K  
D1 1.0000000 sec

===== CHANNEL f1 =====  
NUC1 1H  
P1 8.50 usec  
PL1 0.00 dB  
SFO1 300.1318534 MHz

F2 - Processing parameters  
SI 32768  
SF 300.1300000 MHz  
WDW EM  
SSB 0  
LB 0.30 Hz  
GB 0  
PC 1.00

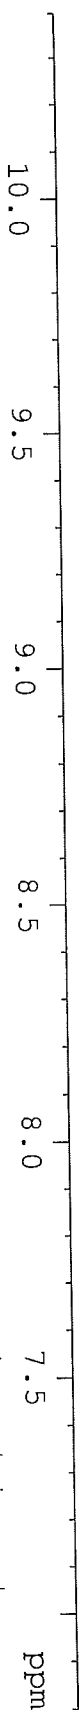

4.630  
4.607  
4.582

4.065  
3.982

3.248

2.988

2.553  
2.531  
2.507

2.140  
2.116  
2.093  
2.068  
2.044

1.825

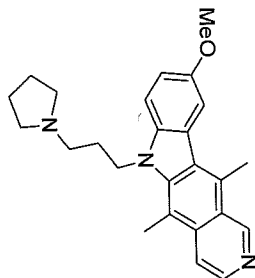

$C_{26}H_{29}N_3O$   
Exact Mass: 387.23

Current Data Parameters  
NAME CV-GSA-02112  
EXPNO 1  
PROCNO 1  
F2 - Acquisition Parameters  
Date\_ 20110422  
Time 16.38  
INSTRUM spect  
PROBHD 5 mm QNP 1H/1  
PULPROG zg30  
TD 65536  
SOLVENT CDCl3  
NS 16  
DS 2  
SWH 6172.839 Hz  
FIDRES 0.094190 Hz  
AQ 5.3084660 sec  
RG 456.1  
DE 81.000 usec  
TE 300.0 K  
D1 1.00000000 sec

===== CHANNEL f1 =====  
NUC1 1H  
P1 8.50 usec  
PL1 0.00 dB  
SFO1 300.1318534 MHz  
F2 - Processing parameters  
SI 32768  
SF 300.1300000 MHz  
WDW EM  
SSB 0  
LB 0.30 Hz  
GB 0  
PC 1.00

2.167

3.226

3.369

3.241

6.426

2.326

4.265

ppm

154.264  
150.195  
141.914  
141.438  
139.881  
134.776  
129.368  
125.329  
124.723  
122.926  
116.281  
114.811  
109.787  
109.311  
108.858

77.855  
77.431  
77.008

56.687  
54.533  
53.614

44.406

29.593

23.895

15.109  
13.993

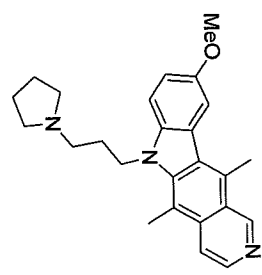

$C_{20}H_{20}N_2O$   
Exact Mass: 387.23

*CDCl<sub>3</sub>*

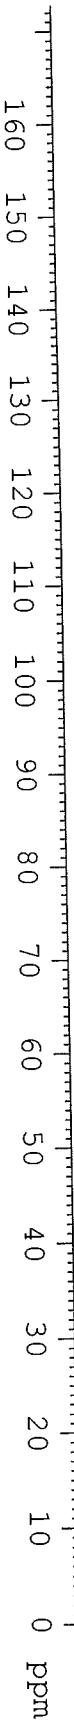

Current Data Parameters  
NAME CV-GSA-02112  
EXPNO 2  
PROCNO 1

F2 - Acquisition Parameters  
Date\_ 20110423  
Time\_ 8.41

INSTRUM spect  
PROBHD 5 mm QNP 1H/1  
PULPROG zgpg30  
TD 65536  
FIDRES 0.274439 Hz  
AQ 1.8219508 sec  
RG 8192  
DE 27.800 usec  
TE 300.0 K  
D1 2.00000000 sec  
d11 0.03000000 sec  
d12 0.0002000 sec

DS 4  
SWH 17985.611 Hz  
FIDRES 0.274439 Hz  
AQ 1.8219508 sec

NUC1 13C  
P1 6.00 usec  
PL1 2.00 dB  
SFO1 75.4752653 MHz

CHANNEL f1  
=====

CPDPRG2 waltz16  
NUC2 1H  
PCPD2 80.00 usec  
PL2 0.00 dB  
PL12 19.47 dB  
PL13 19.00 dB  
SFO2 300.1312005 MHz

F2 - Processing parameters  
SI 32768  
SF 75.4677190 MHz  
WDW EM  
SSB 0  
LB 1.00 Hz  
GB 0  
PC 1.00



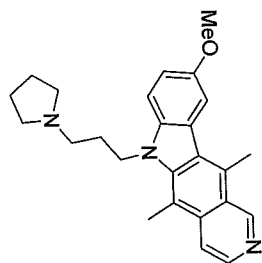

$C_{25}H_{26}N_2O$   
Exact Mass: 387.23

|         |
|---------|
| 154.264 |
| 150.195 |
| 141.914 |
| 141.438 |
| 139.881 |
| 134.776 |
| 129.368 |
| 125.329 |
| 124.723 |
| 122.926 |
| 116.281 |
| 114.811 |
| 109.787 |
| 109.311 |
| 108.858 |

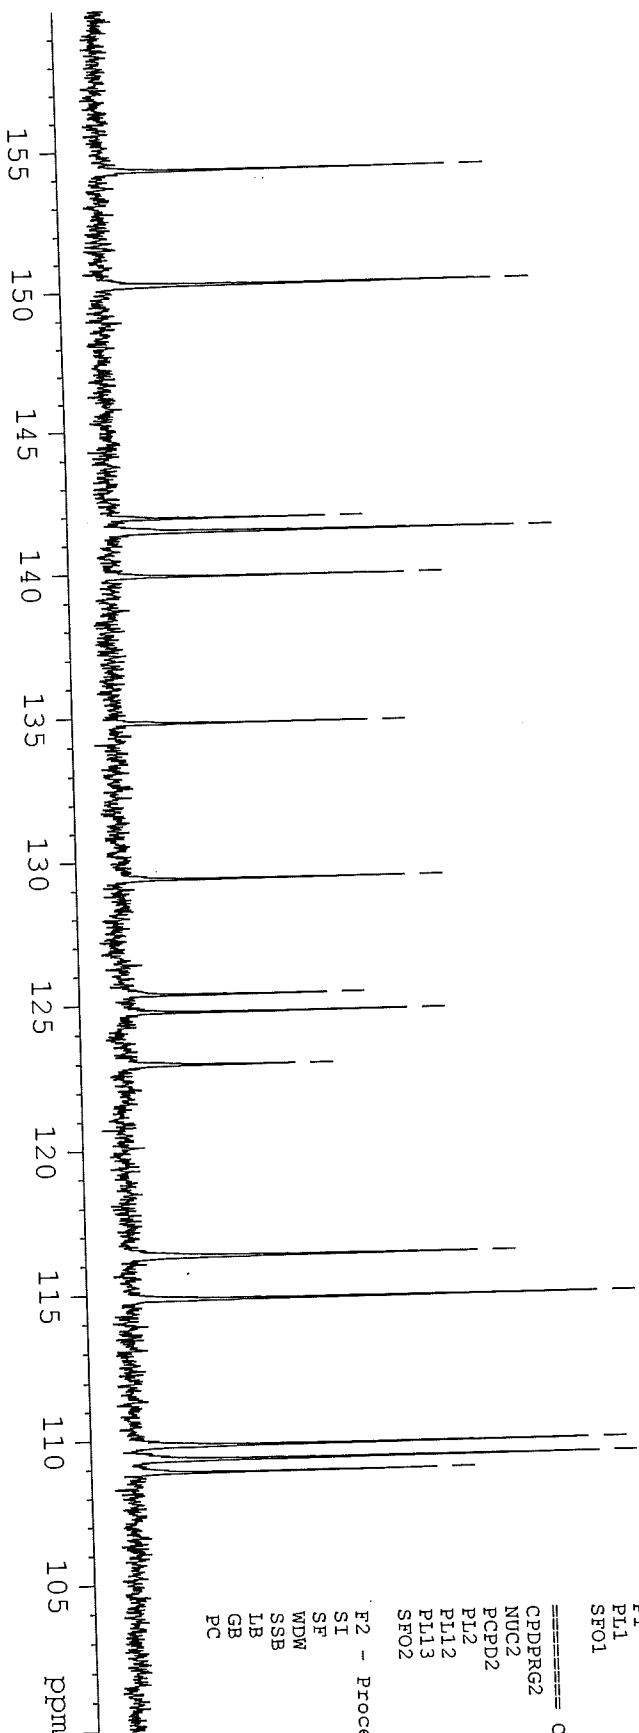

Current Data Parameters  
NAME CV-GSA-02112  
EXPNO 2  
PROCNO 1

F2 - Acquisition Parameters

Date\_ 20110423  
Time\_ 8.41  
INSTRUM spect  
PROBHD 5 mm QNP 1H/1  
PULPROG zgpg30  
TD 65536  
SOLVENT CDCl3  
NS 15000  
DS 4  
SWH 17985.611 Hz  
FIDRES 0.274439 Hz  
AQ 1.8219508 sec  
RG 8192  
DE 27.800 usec  
TE 6.00 usec  
D1 300.0 K  
d11 2.00000000 sec  
d12 0.03000000 sec  
d13 0.0002000 sec

CHANNEL F1  
NUC1 13C  
P1 6.00 usec  
PL1 2.00 dB  
SFO1 75.4752653 MHz

CHANNEL F2  
CPDPRG2 waltz16  
NUC2 1H  
PCPD2 80.00 usec  
PL2 0.00 dB  
PL12 19.47 dB  
PL13 19.00 dB  
SFO2 300.1312005 MHz

F2 - Processing parameters  
SI 32768  
SF 75.4677190 MHz  
WDW EM  
SSB 0  
LB 1.00 Hz  
GB 0  
PC 1.00

56.687  
54.533  
53.614

44.406

29.593

23.895

15.109  
13.993

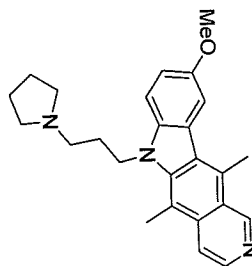

$C_{25}H_{29}N_3O$   
Exact Mass: 387.23

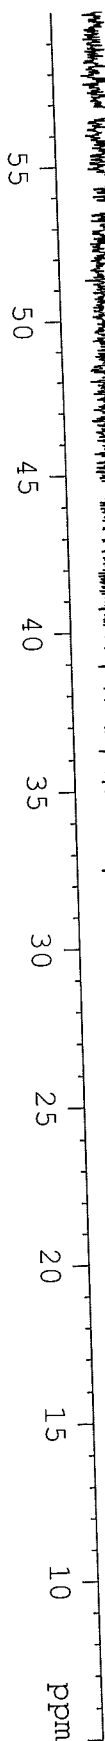

Current Data Parameters  
NAME CV-GSA-02112  
EXPNO 2  
PROCNO 1

F2 - Acquisition Parameters

Date\_ 20110423  
Time 8.41

INSTRUM spect  
PROBHD 5 mm QNP 1H/1

PULPROG zgpg30  
TD 65536

CDCL3  
SOLVENT 15000

DS 4  
SWH 17985.611 Hz

FIDRES 0.274439 Hz  
AQ 1.8219508 sec

RG 8192  
DW 27.800 usec

DE 6.00 usec  
TE 300.0 K

D1 2.0000000 sec  
d11 0.0300000 sec

d12 0.0002000 sec

===== CHANNEL f1 =====  
NUC1 13C  
P1 6.00 usec

PL1 2.00 dB  
SFO1 75.4752653 MHz

===== CHANNEL f2 =====  
CPDPRG2 waltz16  
NUC2 1H

PCPD2 80.00 usec  
PL2 0.00 dB

PL12 19.47 dB  
PL13 19.00 dB

SFO2 300.1312005 MHz

F2 - Processing Parameters  
SI 32768

SF 75.4677190 MHz  
WDW EM

SSB 0  
LB 1.00 Hz

GB 0  
PC 1.00

V. Chappeta, ACN:MeOH 1:1

CV\_GSA\_02122 #51-58 RT: 1.01-1.13 AV: 8 NL: 2.72E7

T: + p Full ms [170.00-1000.00]

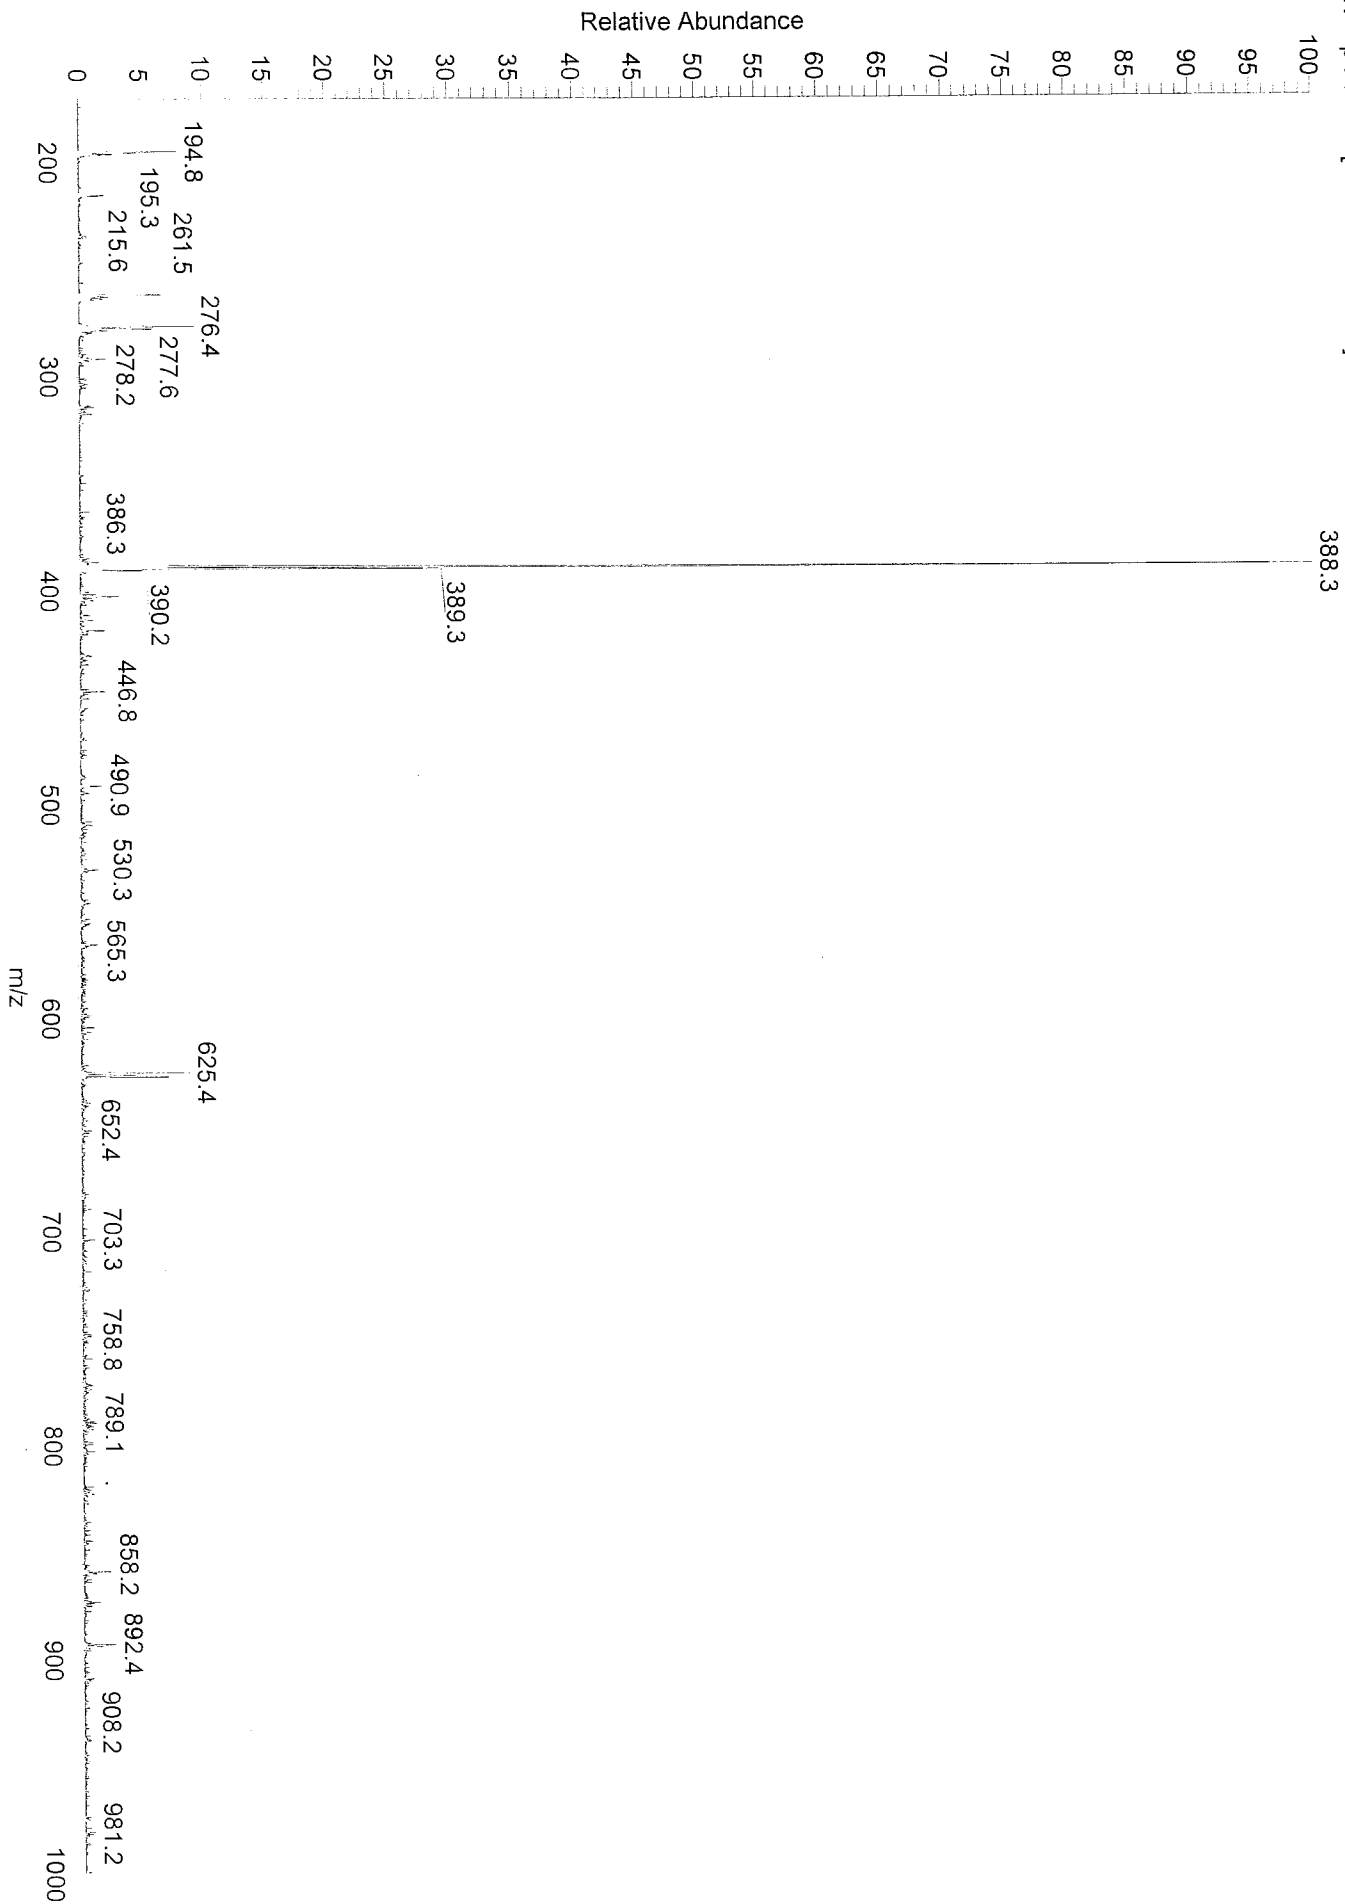

# Generic Display Report (all)

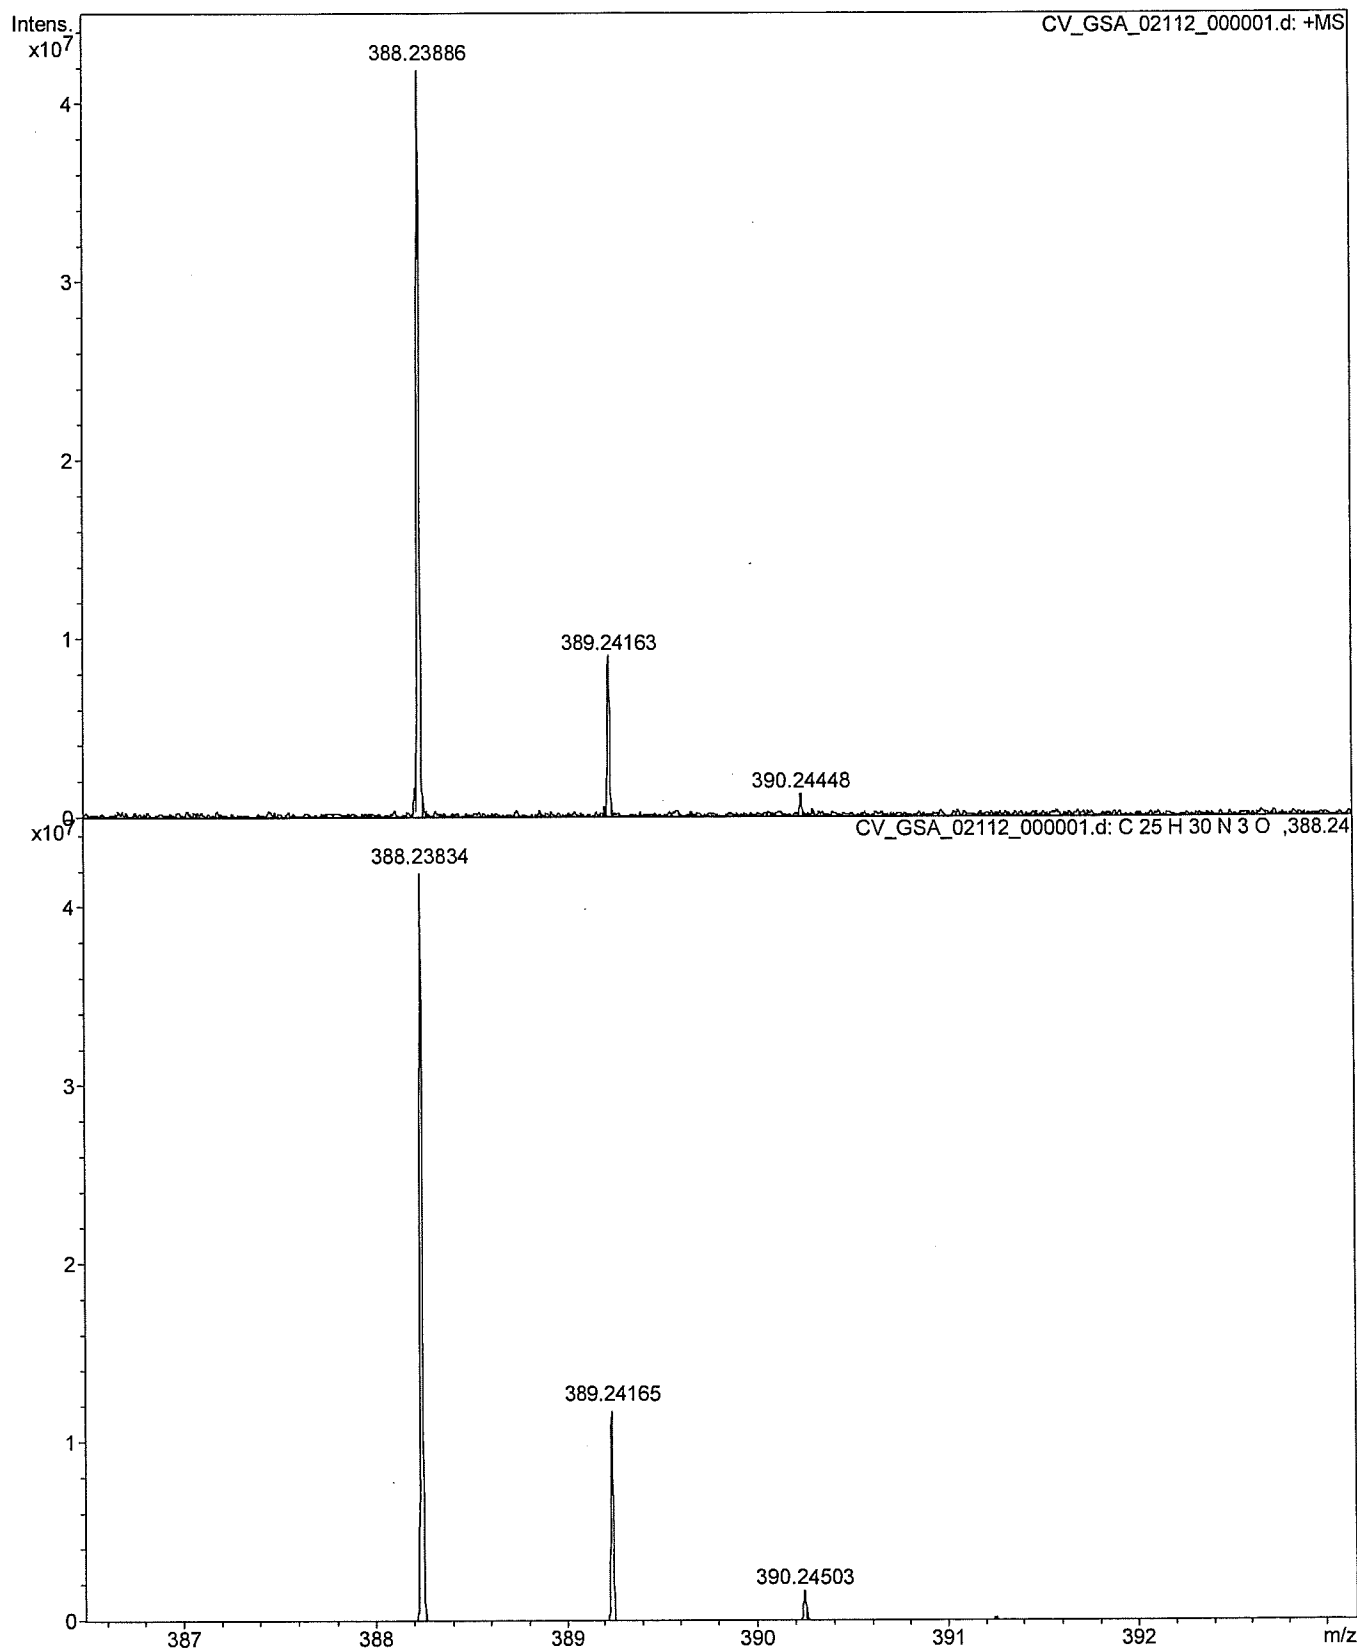

Min

Max

Note: for m < 2000 the elements C, H, N, and O are considered implicitly.

Measured m/z  Tolerance  mDa  Charge

| Meas. m/z | # | Formula           | Score  | m/z       | err [mDa] | err [ppm] | mSigma | rdb  | e <sup>-</sup> Conf | N-Rule |
|-----------|---|-------------------|--------|-----------|-----------|-----------|--------|------|---------------------|--------|
| 388.23886 | 1 | C 13 H 34 N 5 O 8 | 78.04  | 388.24019 | 1.3       | 3.4       | 30.3   | -0.5 | even                | ok     |
|           | 2 | C 25 H 30 N 6 O   | 100.00 | 388.23884 | -0.5      | -1.3      | 38.3   | 12.5 | even                | ok     |

☐ Automatically locate monoisotopic peak Maximum number of formulas

☒ Check rings plus double bonds Minimum  Maximum

Electron configuration

☒ Filter H/C element ratio Minimum H/C  Maximum H/C

☒ Estimate carbon number ☒ Generate immediately

```

=====
Injection Date   : 4/21/2011 5:04:20 PM
Sample Name      : CV-GSA-02112
Acq. Operator    : Karen
Acq. Instrument  : Instrument 1
Acq. Method      : C:\HPCHEM\1\METHODS\LC_MS_UV.M
Last changed     : 4/21/2011 5:00:29 PM by Karen
Analysis Method  : C:\HPCHEM\1\METHODS\LC_MS_UV.M
Last changed     : 4/21/2011 5:18:10 PM by Karen
                  (modified after loading)

```

Zorbax SB C18, 150 x 4.6, 3.5u, 45/55/0.25, MeOH/water/formic, POS, 150-500; frag 30; 30C, cap  
voltage 1500, gas temp 350; drying gas 10

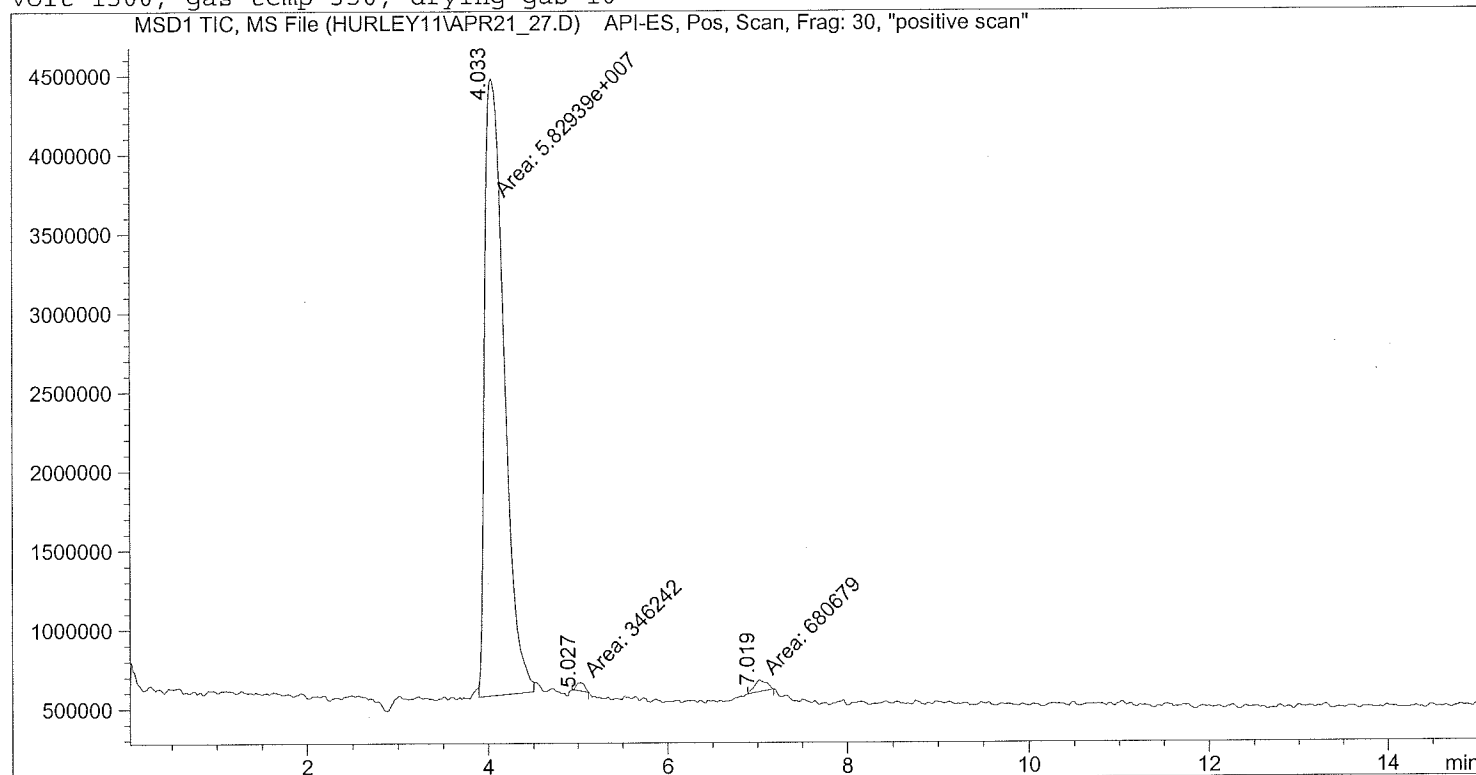

=====  
Area Percent Report  
=====

```

Sorted By      : Signal
Multiplier     : 1.0000
Dilution      : 1.0000
Use Multiplier & Dilution Factor with ISTDs

```

Signal 1: MSD1 TIC, MS File

| Peak # | RetTime [min] | Type | Width [min] | Area      | Height    | Area %  |
|--------|---------------|------|-------------|-----------|-----------|---------|
| 1      | 4.033         | MF   | 0.2490      | 5.82939e7 | 3.90198e6 | 98.2689 |
| 2      | 5.027         | MM   | 0.1013      | 3.46242e5 | 5.69697e4 | 0.5837  |
| 3      | 7.019         | MM   | 0.1483      | 6.80679e4 | 7.64851e4 | 1.1475  |

Totals : 5.93208e7 4.03543e6

=====  
\*\*\* End of Report \*\*\*

```

=====
Injection Date   : 4/21/2011 5:04:20 PM
Sample Name      : CV-GSA-02112
Acq. Operator    : Karen
Acq. Instrument  : Instrument 1
Acq. Method      : C:\HPCHEM\1\METHODS\LC_MS_UV.M
Last changed     : 4/21/2011 5:00:29 PM by Karen
Analysis Method  : C:\HPCHEM\1\METHODS\LC_MS_UV.M
Last changed     : 4/21/2011 5:18:10 PM by Karen
                  (modified after loading)
  
```

Zorbax SB C18, 150 x 4.6, 3.5u, 45/55/0.25, MeOH/water/formic, POS, 150-500; frag 30; 30C, cap volt 1500, gas temp 350; drying gas 10

Current Chromatogram(s)

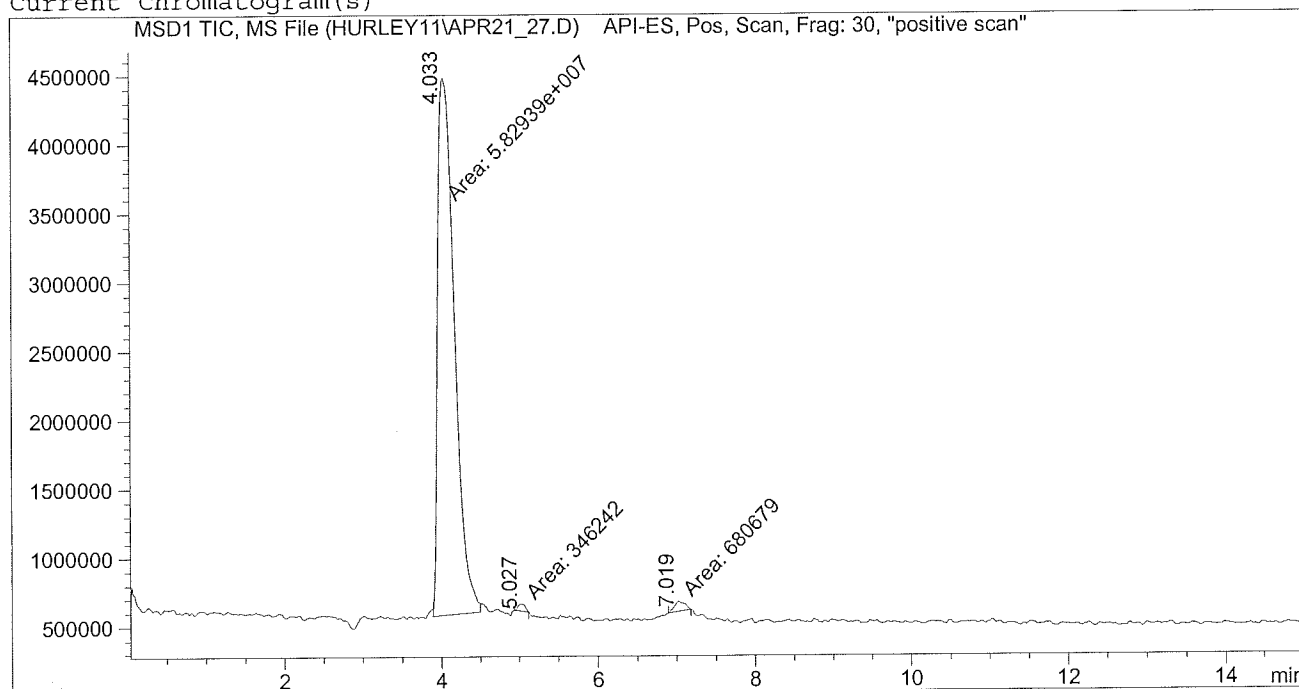

MS Spectrum

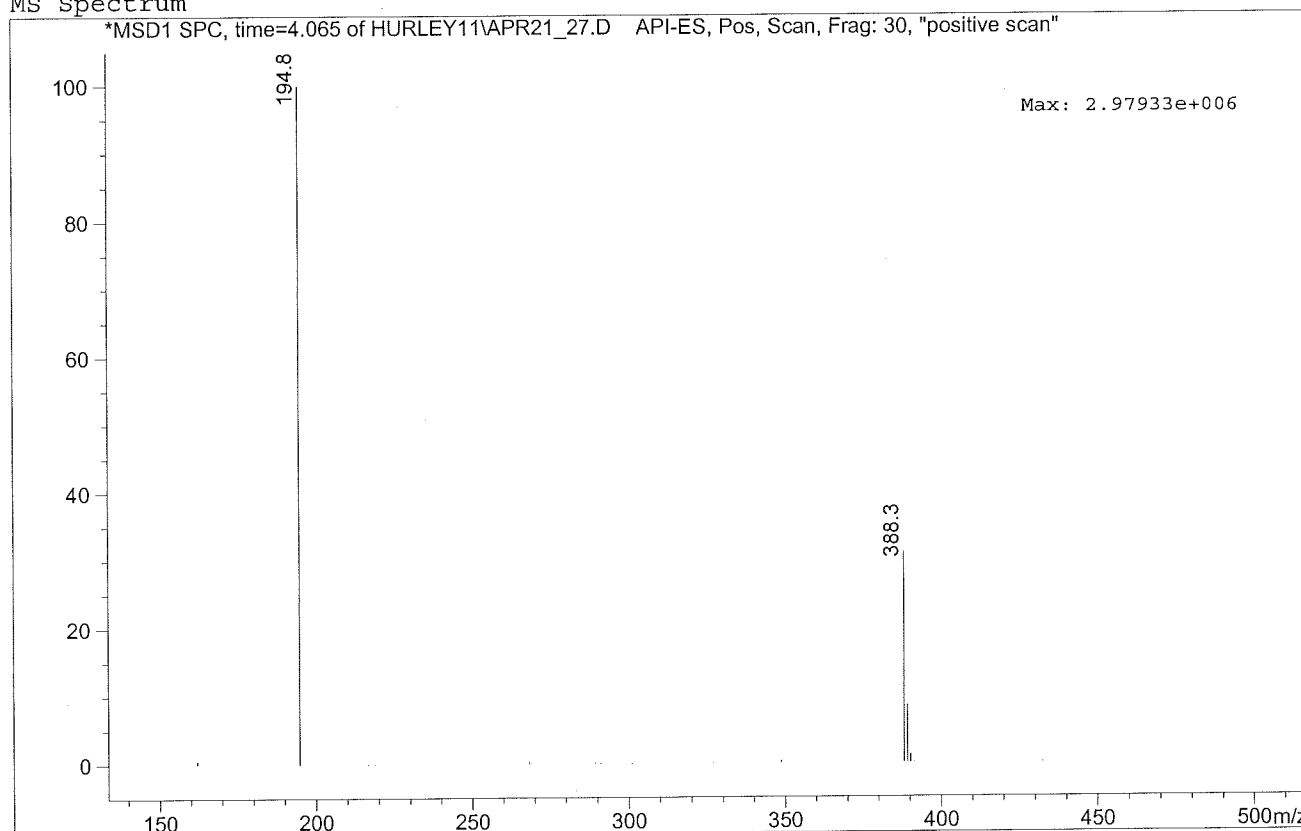

=====

|                 |                                  |            |            |
|-----------------|----------------------------------|------------|------------|
| Injection Date  | : 4/21/2011 5:04:20 PM           | Location   | : Vial 121 |
| Sample Name     | : CV-GSA-02112                   | Inj        | : 1        |
| Acq. Operator   | : Karen                          | Inj Volume | : 0.1 µl   |
| Acq. Instrument | : Instrument 1                   |            |            |
| Acq. Method     | : C:\HPCHEM\1\METHODS\LC_MS_UV.M |            |            |
| Last changed    | : 4/21/2011 5:00:29 PM by Karen  |            |            |
| Analysis Method | : C:\HPCHEM\1\METHODS\LC_MS_UV.M |            |            |
| Last changed    | : 4/21/2011 5:18:10 PM by Karen  |            |            |

(modified after loading)

Zorbax SB C18, 150 x 4.6, 3.5µ, 45/55/0.25, MeOH/water/formic, POS, 150-500; frag 30; 30C, cap volt 1500, gas temp 350; drying gas 10

Current Chromatogram(s)

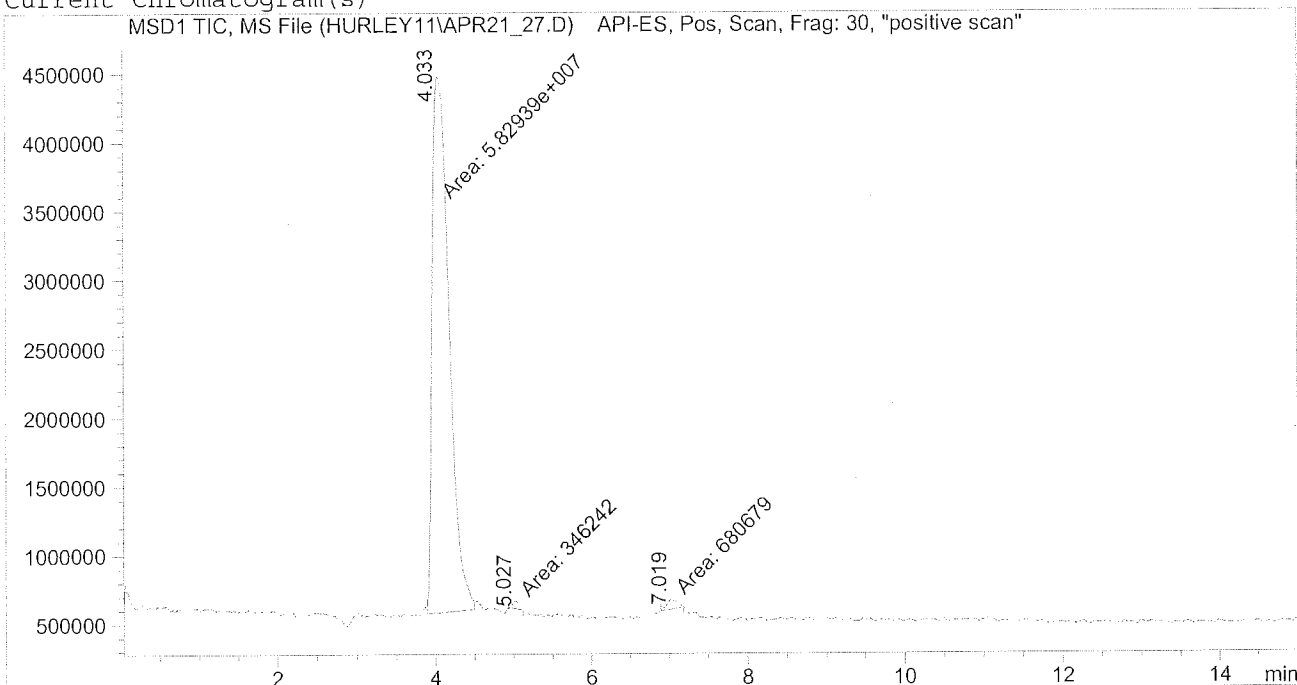

MS Spectrum

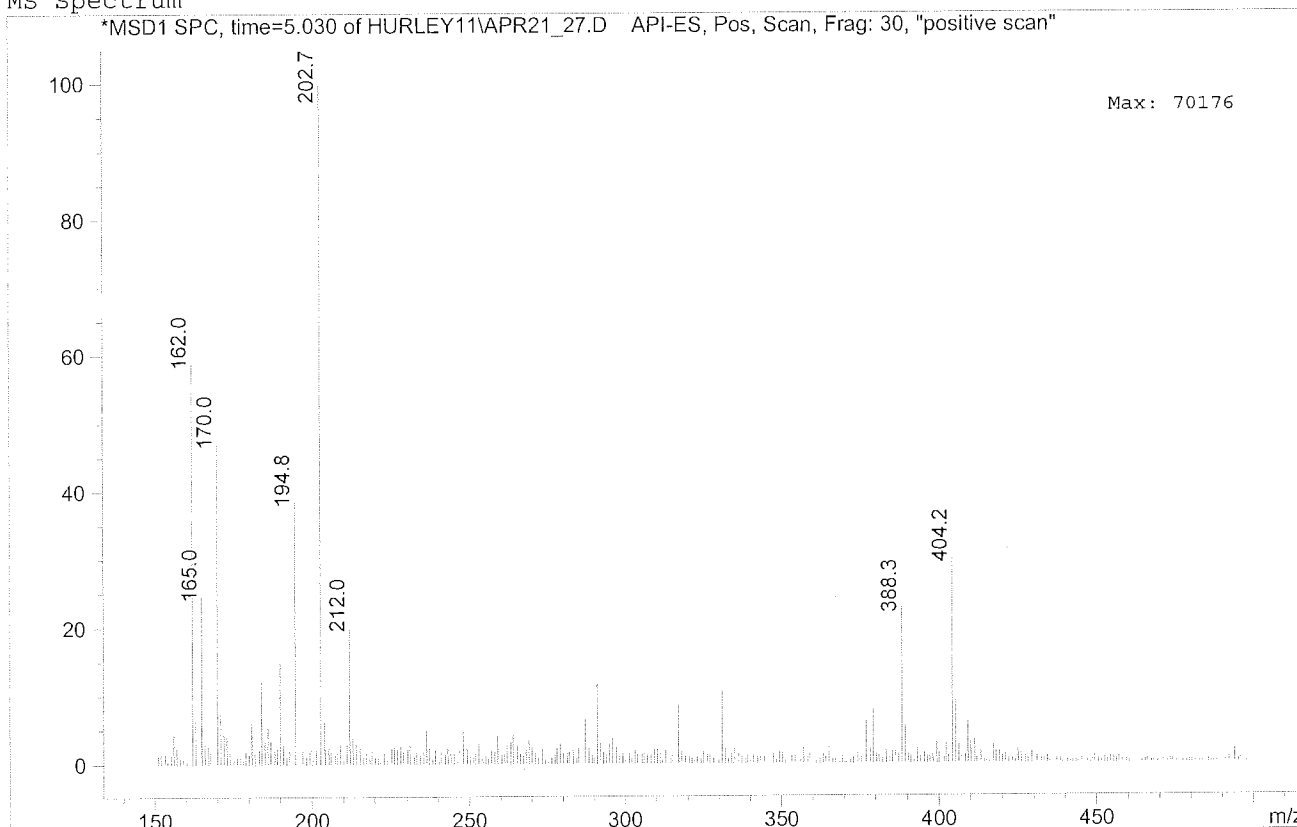



```

=====
Injection Date   : 4/21/2011 5:04:20 PM
Sample Name      : CV-GSA-02112
Location         : Vial 121
Acq. Operator    : Karen
Inj              : 1
Acq. Instrument  : Instrument 1
Inj Volume       : 0.1 µl
Acq. Method      : C:\HPCHEM\1\METHODS\LC_MS_UV.M
Last changed     : 4/21/2011 5:00:29 PM by Karen
Analysis Method  : C:\HPCHEM\1\METHODS\LC_MS_UV.M
Last changed     : 4/21/2011 5:18:10 PM by Karen
                  (modified after loading)
  
```

Zorbax SB C18, 150 x 4.6, 3.5µ, 45/55/0.25, MeOH/water/formic, POS, 150-500; frag 30; 30C, cap volt 1500, gas temp 350; drying gas 10

Current Chromatogram(s)

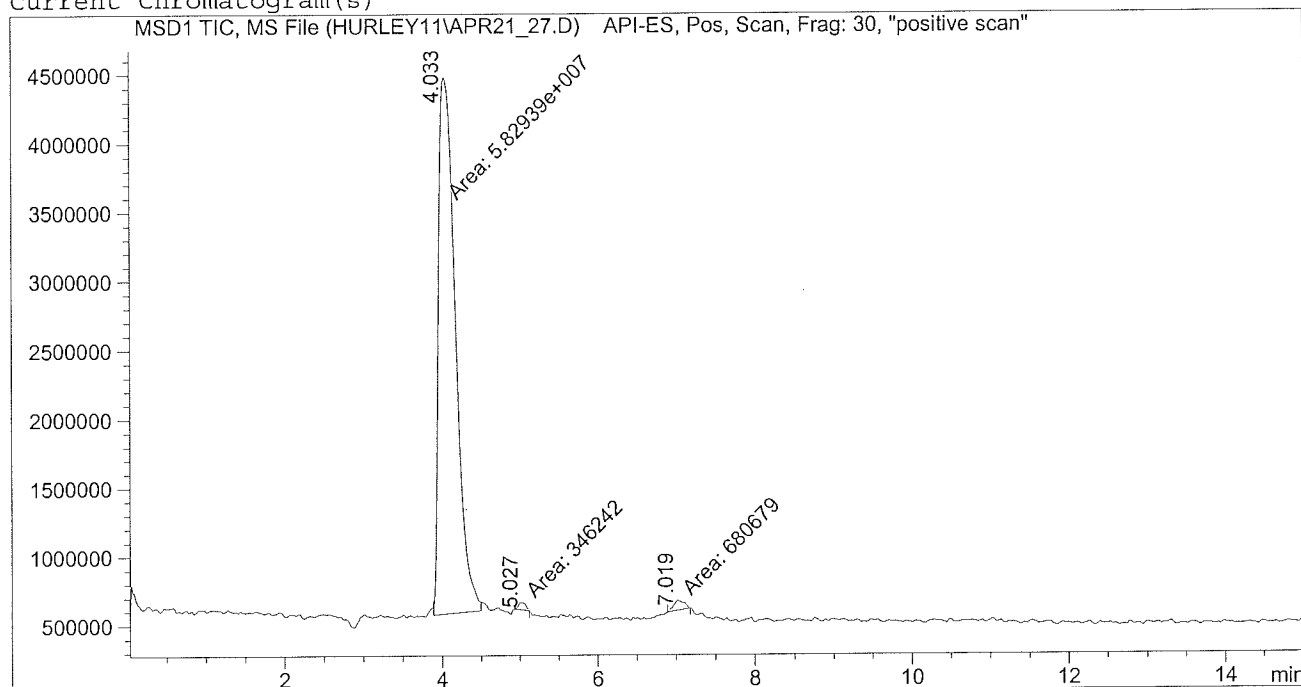

MS Spectrum

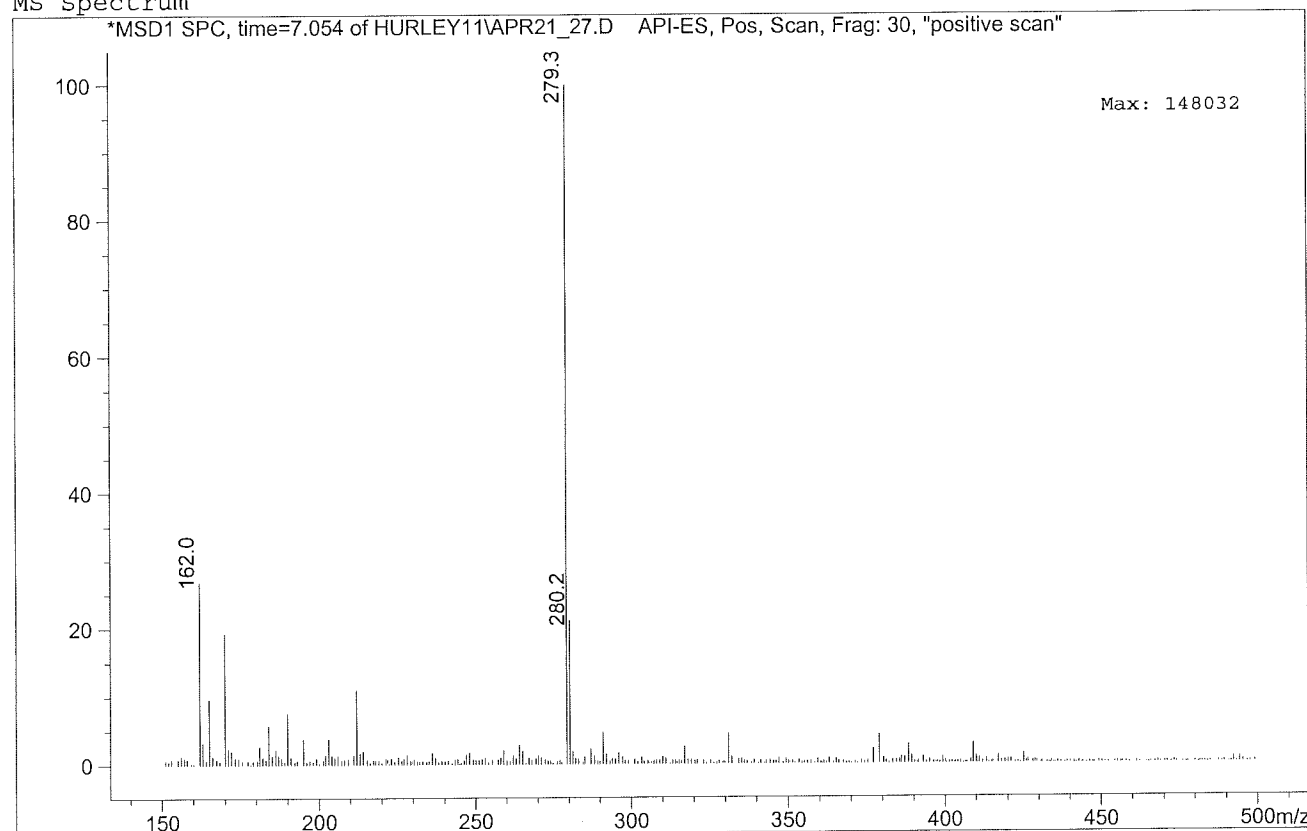

9.697

8.514  
8.493  
7.919  
7.900  
7.894  
7.438  
7.409  
7.281  
7.215  
7.207  
7.185  
7.177

5.313

4.612  
4.588  
4.563

3.984

3.254  
2.995  
2.462  
2.355  
2.328  
2.311  
2.043  
2.021  
1.997  
1.973

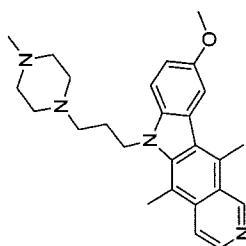

$C_{26}H_{32}N_4O$   
Exact Mass: 416.2576

Current Data Parameters  
NAME CV-GSA-02119  
EXPNO 1  
PROCNO 1

F2 - Acquisition Parameters  
Date\_ 20110527  
Time 14.31  
INSTRUM spect  
PROBHD 5 mm QNP 1H/1  
PULPROG zg30  
TD 65536  
SOLVENT CDCl3  
NS 16  
DS 2  
SWH 6172.839 Hz  
FIDRES 0.094190 Hz  
AQ 5.3084660 sec  
RG 456.1  
DW 81.000 usec  
DE 6.00 usec  
TE 300.0 K  
D1 1.00000000 sec

===== CHANNEL f1 =====  
NUC1 1H  
P1 8.50 usec  
PL1 0.00 dB  
SFO1 300.1318534 MHz  
F2 - Processing parameters  
SI 32768  
SF 300.1300000 MHz  
WDW EM  
SSB 0  
LB 0.30 Hz  
GB 0  
PC 1.00

1.000

1.017

2.119

1.115

1.005

2.173

3.055

3.156

3.217

8.124

5.318

2.260

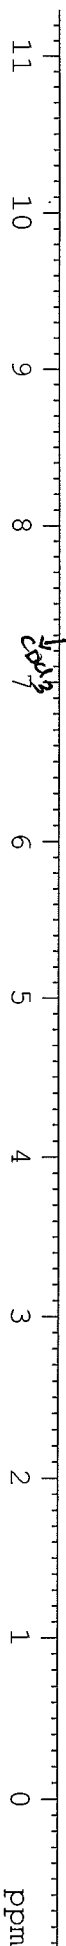

9.697

8.514  
8.493

7.919  
7.900  
7.894

7.438  
7.409  
7.281  
7.215  
7.207  
7.185  
7.177

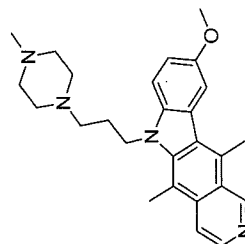

$C_{26}H_{32}N_4O$   
Exact Mass: 416.2576

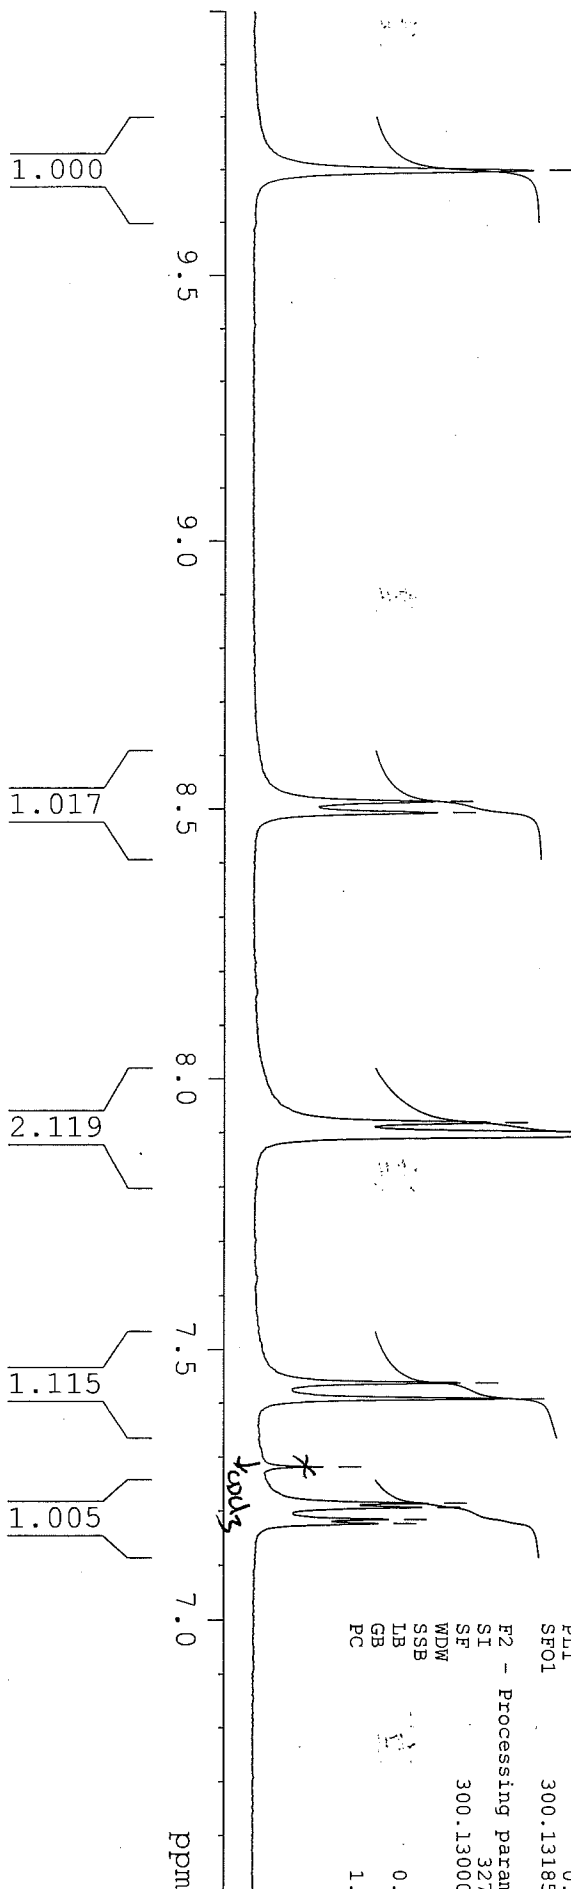

Current Data Parameters  
NAME CV-GSA-02119  
EXPNO 1  
PROCNO 1

F2 - Acquisition Parameters  
Date\_ 20110527  
Time 14.31  
INSTRUM spect  
PROBHD 5 mm QNP 1H/1  
PULPROG zg30  
TD 65536  
SOLVENT CDCl3  
NS 16  
DS 2  
SWH 6172.839 Hz  
FIDRES 0.094190 Hz  
AQ 5.3084660 sec  
RG 456.1  
DW 81.000 usec  
DE 6.00 usec  
TE 300.0 K  
D1 1.00000000 sec

===== CHANNEL f1 =====  
NUC1 1H  
P1 8.50 usec  
PL1 0.00 dB  
SFO1 300.1318534 MHz

F2 - Processing parameters  
SI 32768  
SF 300.1300000 MHz  
WDW EM  
SSB 0  
LB 0.30 Hz  
GB 0  
PC 1.00

4.612  
4.588  
4.563

3.984

3.254

2.995

2.462

2.355

2.328

2.311

2.043

2.021

1.997

1.973

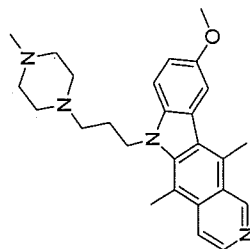

C<sub>26</sub>H<sub>32</sub>N<sub>4</sub>O  
Exact Mass: 416.2576

Current Data Parameters  
NAME CV-GSA-02119  
EXPNO 1  
PROCNO 1

F2 - Acquisition Parameters  
Date\_ 20110527  
Time 14.31  
INSTRUM spect  
PROBHD 5 mm QNP 1H/1  
PULPROG zg30  
TD 2930  
FIDRES 0.094190 Hz  
AQ 5.3084660 sec  
RG 456.1  
DE 6.00 usec  
TE 300.0 K  
D1 1.00000000 sec

===== CHANNEL f1 =====  
NUC1 1H  
P1 8.50 usec  
PL1 0.00 dB  
SFO1 300.1318534 MHz  
F2 - Processing parameters  
SI 32768  
SF 300.1300000 MHz  
WDW EM  
SSB 0  
LB 0.30 Hz  
GB 0  
PC 1.00

2.173

3.055

3.156

3.217

8.124

5.318

2.260

ppm

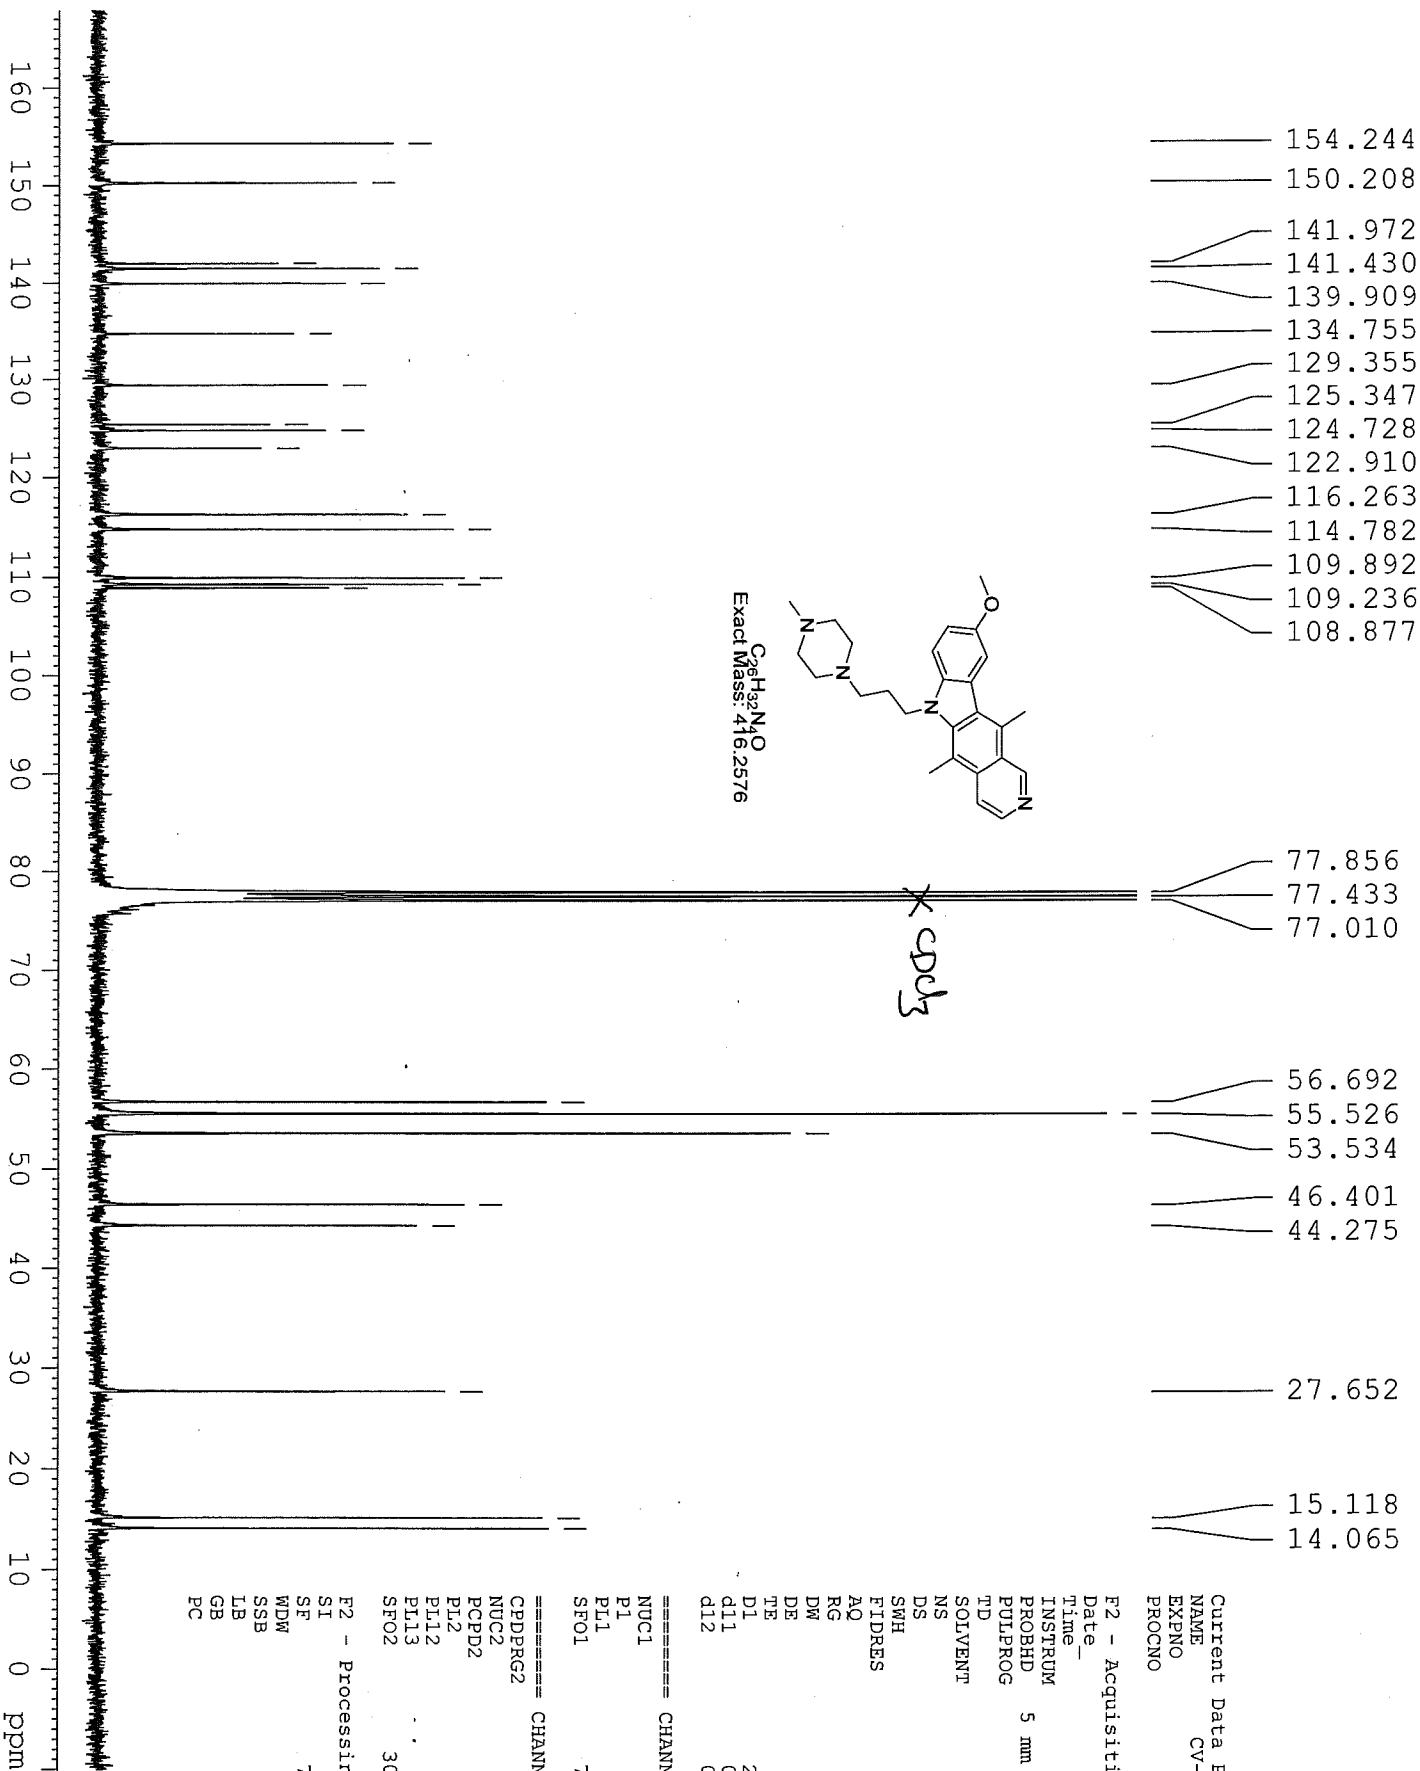

Current Data Parameters  
NAME CV-GSA-02119  
EXPNO 2  
PROCNO 1

F2 - Acquisition Parameters  
Date\_ 20110528  
Time 6.34

INSTRUM spect  
PROBHD 5 mm QNP 1H/1  
PULPROG zgpg30

TD 65536  
SOLVENT CDCl3  
NS 15000

DS 4  
SWH 17985.611 Hz  
FIDRES 0.274439 Hz

RG 1.8219508 sec  
DE 10321.3  
DW 27.800 usec

TE 300.0 K  
D1 2.00000000 sec  
d11 0.03000000 sec  
d12 0.00002000 sec

===== CHANNEL f1 =====  
NUC1 13C  
P1 6.00 usec  
PL1 2.00 dB  
SF01 75.4752653 MHz

===== CHANNEL f2 =====  
CPDPRG2 waltz16  
NUC2 1H  
PCPD2 80.00 usec  
PL2 0.00 dB  
PL12 19.47 dB  
PL13 19.00 dB  
SFO2 300.1312005 MHz

F2 - Processing parameters  
SI 32768  
SF 75.4677190 MHz  
WDW EM  
SSB 0  
LB 1.00 Hz  
GB 0  
PC 1.00

|         |
|---------|
| 154.244 |
| 150.208 |
| 141.972 |
| 141.430 |
| 139.909 |
| 134.755 |
| 129.355 |
| 125.347 |
| 124.728 |
| 122.910 |
| 116.263 |
| 114.782 |
| 109.892 |
| 109.236 |
| 108.877 |

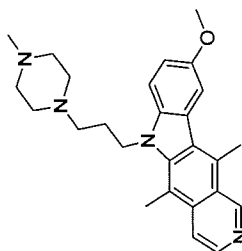

$C_{26}H_{32}N_4O$   
Exact Mass: 416.2576

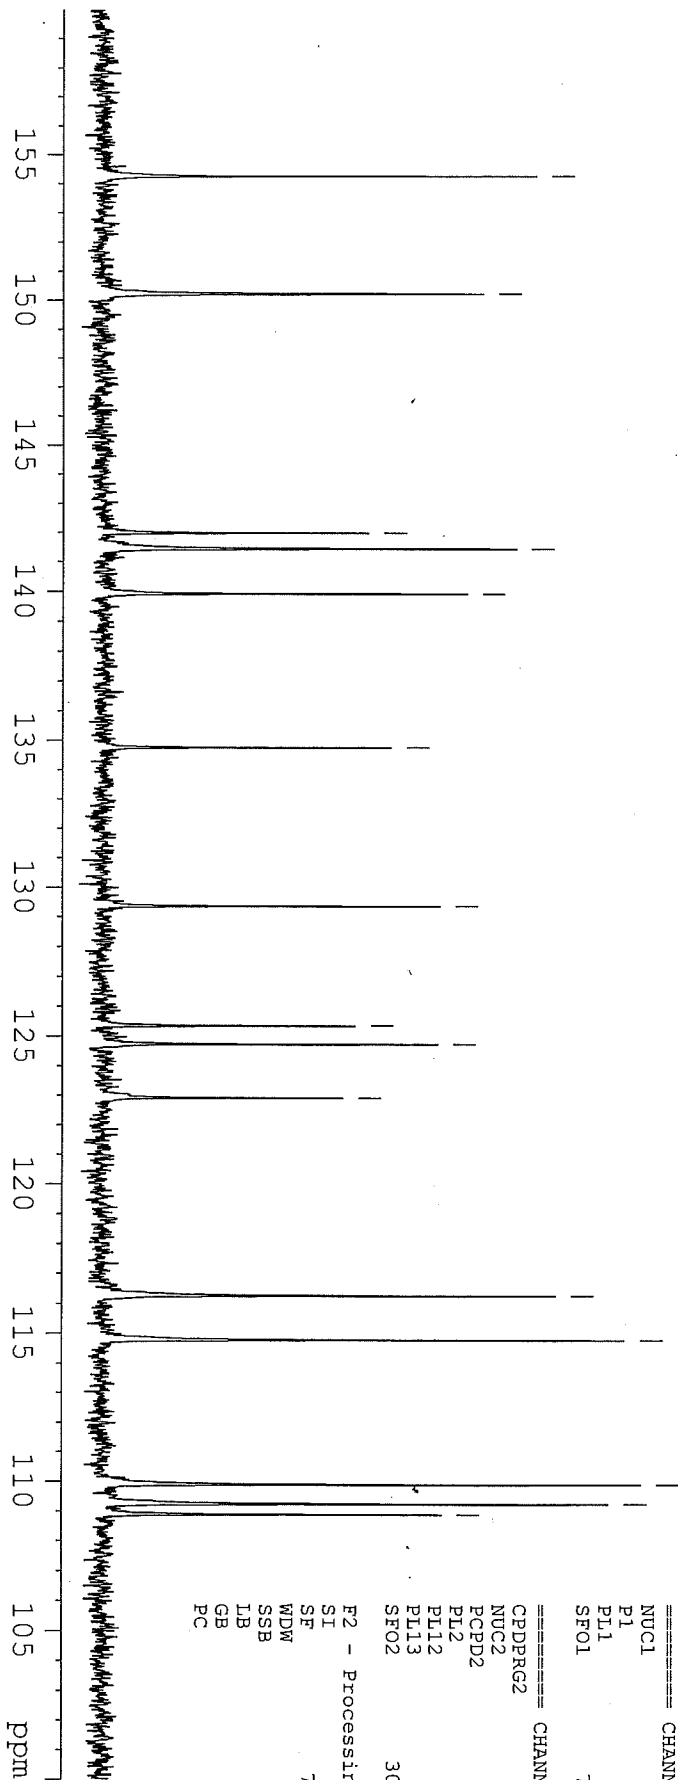

Current Data Parameters  
NAME CV-GSA-02119  
EXPNO 2  
PROCNO 1

# F2 - Acquisition Parameters

Date\_ 20110528  
Time 6.34  
INSTRUM spect  
PROBHD 5 mm QNP 1H/1  
PULPROG zgpg30  
TD 65536  
SOLVENT CDCl3  
NS 15000  
DS 4  
SWH 17985.611 Hz  
FIDRES 0.274439 Hz  
AQ 1.8219508 sec  
RG 10321.3  
DW 27.800 usec  
DE 6.00 usec  
TE 300.0 K  
D1 2.00000000 sec  
d11 0.03000000 sec  
d12 0.00002000 sec

## CHANNEL f1

NUC1 13C  
P1 6.00 usec  
PL1 2.00 dB  
SFO1 75.4752653 MHz

## CHANNEL f2

CPDPRG2 waltz16  
NUC2 1H  
PCPD2 80.00 usec  
PL2 0.00 dB  
PL12 19.47 dB  
PL13 19.00 dB  
SFO2 300.1312005 MHz

## F2 - Processing parameters

SI 32768  
SF 75.4677190 MHz  
WDW EM  
SSB 0  
LB 1.00 Hz  
GB 0  
PC 1.00

56.692  
55.526  
53.534

46.401  
44.275

27.652

15.118  
14.065

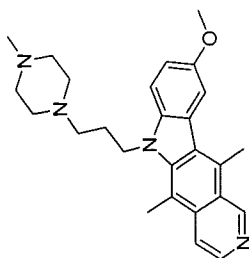

C<sub>26</sub>H<sub>32</sub>N<sub>4</sub>O  
Exact Mass: 416.2576

Current Data Parameters  
NAME CV-GSA-02119  
EXPNO 2  
PROCNO 1

F2 - Acquisition Parameters  
Date\_ 20110528  
Time 6.34

INSTRUM 5 mm QNP spect  
PROBHD 1H/1  
PULPROG zgpg30  
TD 65536  
SOLVENT CDCl3  
NS 15000  
DS 4  
SWH 17985.611 Hz  
FIDRES 0.274439 Hz  
AQ 1.8219508 sec  
RG 10321.3  
DW 27.800 usec  
DE 6.00 usec  
TE 300.0 K  
D1 2.00000000 sec  
d11 0.03000000 sec  
d12 0.00002000 sec

===== CHANNEL f1 =====  
NUC1 13C  
P1 6.00 usec  
PL1 2.00 dB  
SFO1 75.4752653 MHz

===== CHANNEL f2 =====  
CPDPRG2 waltz16  
NUC2 1H  
PCPD2 80.00 usec  
PL2 0.00 dB  
PL12 19.47 dB  
PL13 19.00 dB  
SFO2 300.1312005 MHz

F2 - Processing parameters  
SI 32768  
SF 75.4677190 MHz  
WDW EM  
SSB 0  
LB 1.00 Hz  
GB 0  
PC 1.00

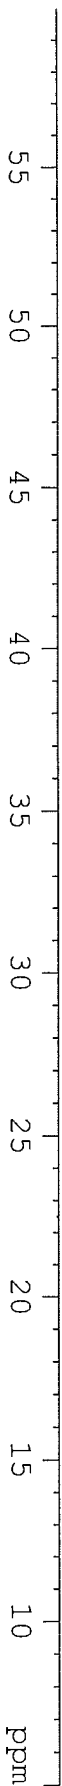

=====  
Injection Date : 5/26/2011 6:46:51 PM  
Sample Name : CV-GSA-02119 Location : Vial 120  
Acq. Operator : Karen Inj : 1  
Acq. Instrument : Instrument 1 Inj Volume : 0.1 µl  
Method : C:\HPCHEM\1\METHODS\LC\_MS\_UV.M  
Last changed : 5/26/2011 6:43:10 PM by Karen  
Zorbax SB C18, 150 x 4.6, 3.5µ, 45/55/0.25, MeOH/water/formic, POS, 150-550; frag 70; 25C, cap  
volt 1500, gas temp 350; drying gas 10

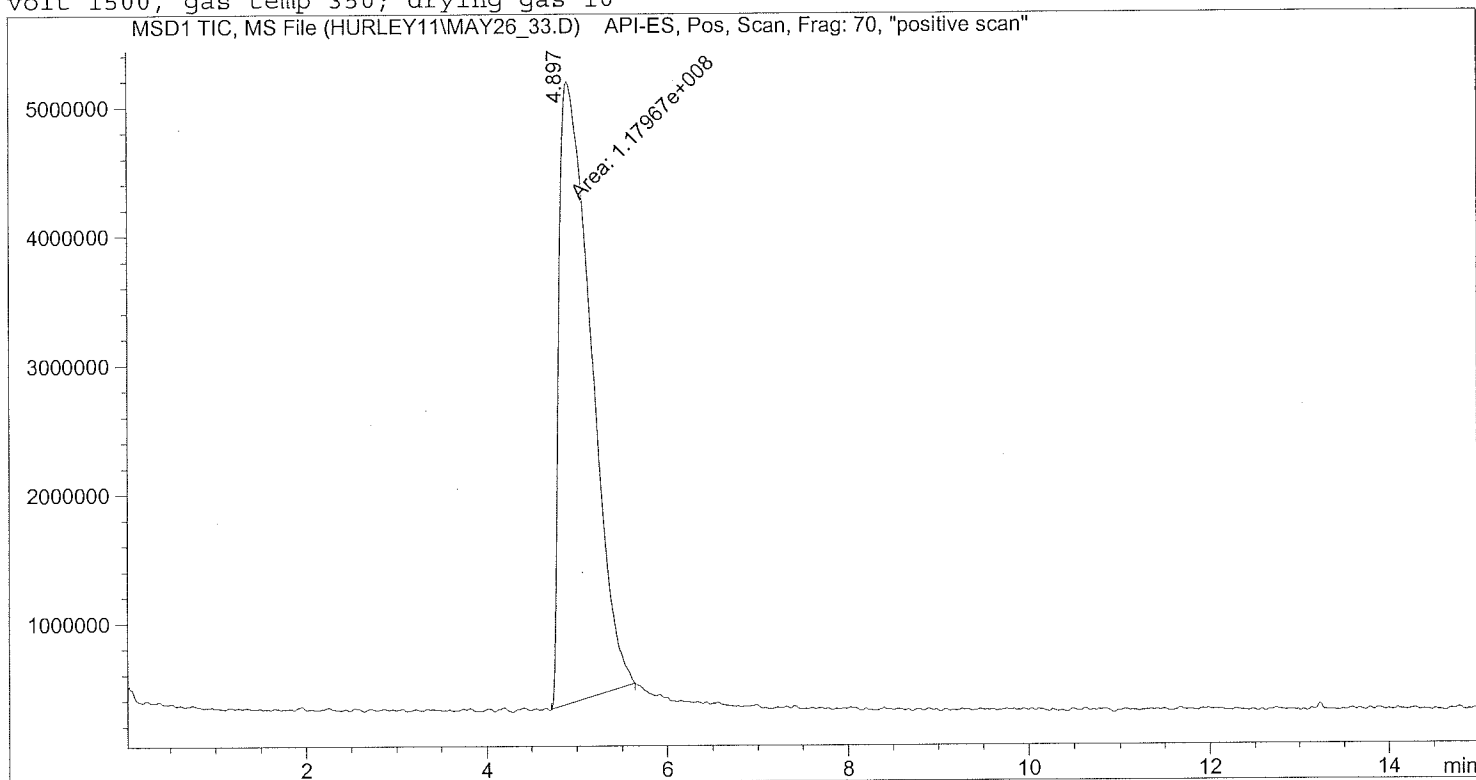

=====  
Area Percent Report  
=====

Sorted By : Signal  
Multiplier : 1.0000  
Dilution : 1.0000  
Use Multiplier & Dilution Factor with ISTDs

Signal 1: MSD1 TIC, MS File

| Peak # | RetTime [min] | Type | Width [min] | Area      | Height    | Area %   |
|--------|---------------|------|-------------|-----------|-----------|----------|
| 1      | 4.897         | MM   | 0.4071      | 1.17967e8 | 4.82939e6 | 100.0000 |

Totals : 1.17967e8 4.82939e6

=====  
\*\*\* End of Report \*\*\*



```
=====
Injection Date   : 5/26/2011 6:46:51 PM
Sample Name      : CV-GSA-02119
Acq. Operator    : Karen
Acq. Instrument  : Instrument 1
Method           : C:\HPCHEM\1\METHODS\LC_MS_UV.M
Last changed     : 5/26/2011 6:43:10 PM by Karen
Zorbax SB C18, 150 x 4.6, 3.5u,45/55/0.25,MeOH/water/formic, POS, 150-550; frag 70; 25C,
cap volt 1500, gas temp 350; drying gas 10
=====
```

Current Chromatogram(s)

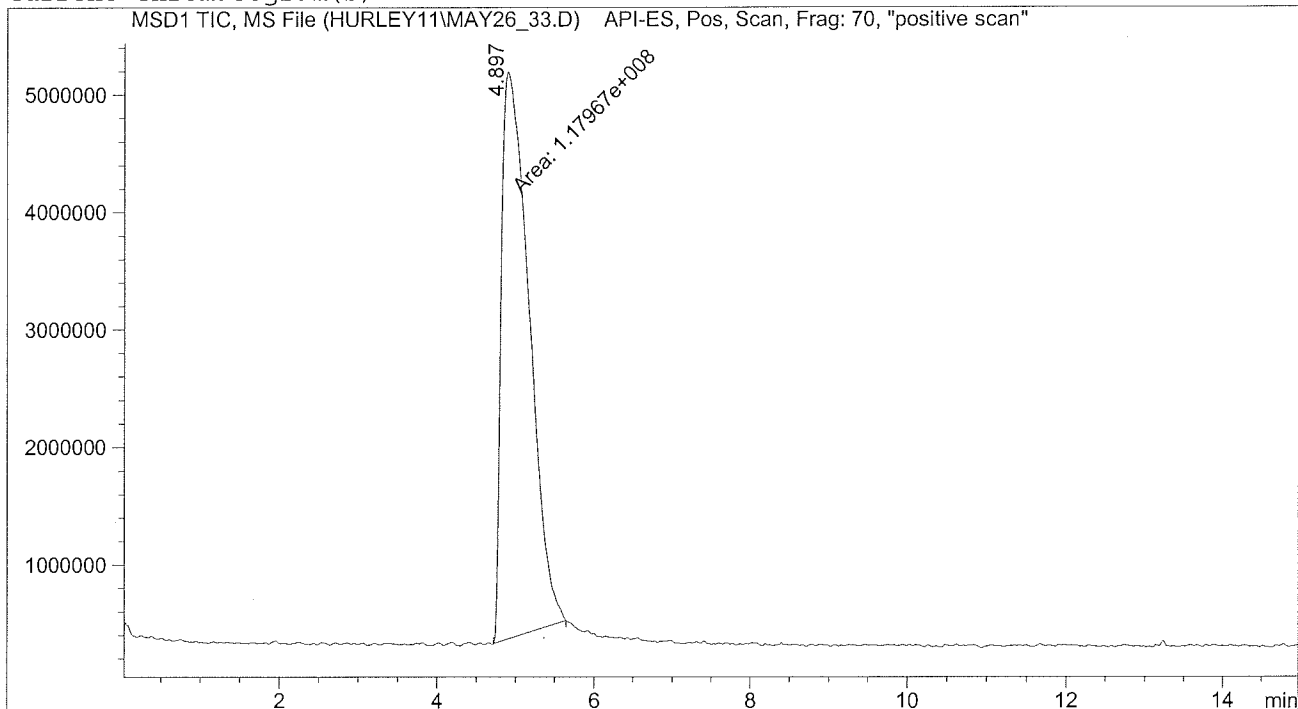

MS Spectrum

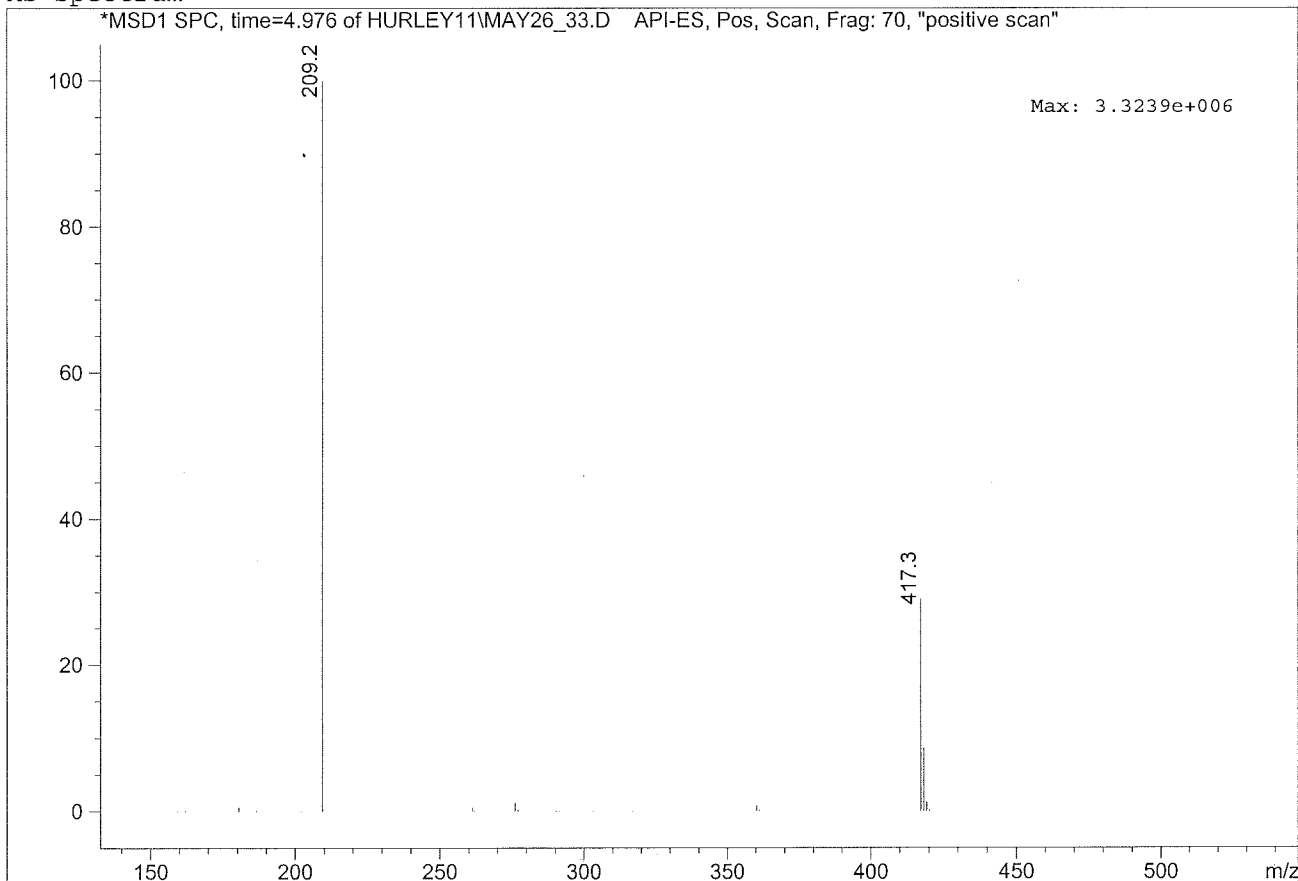

# Generic Display Report

## Analysis Info

Analysis Name D:\DATA\Facility\_May\_11\CV\_GSA\_02119\_000003.d  
Method Scott\_tune  
Sample Name CV\_GSA\_02119  
Comment V. R. Chappeta, ACN:H2O 1:1:0.1%FA

Acquisition Date 5/27/2011 10:32:51 AM

Operator  
Instrument apex-Ultra

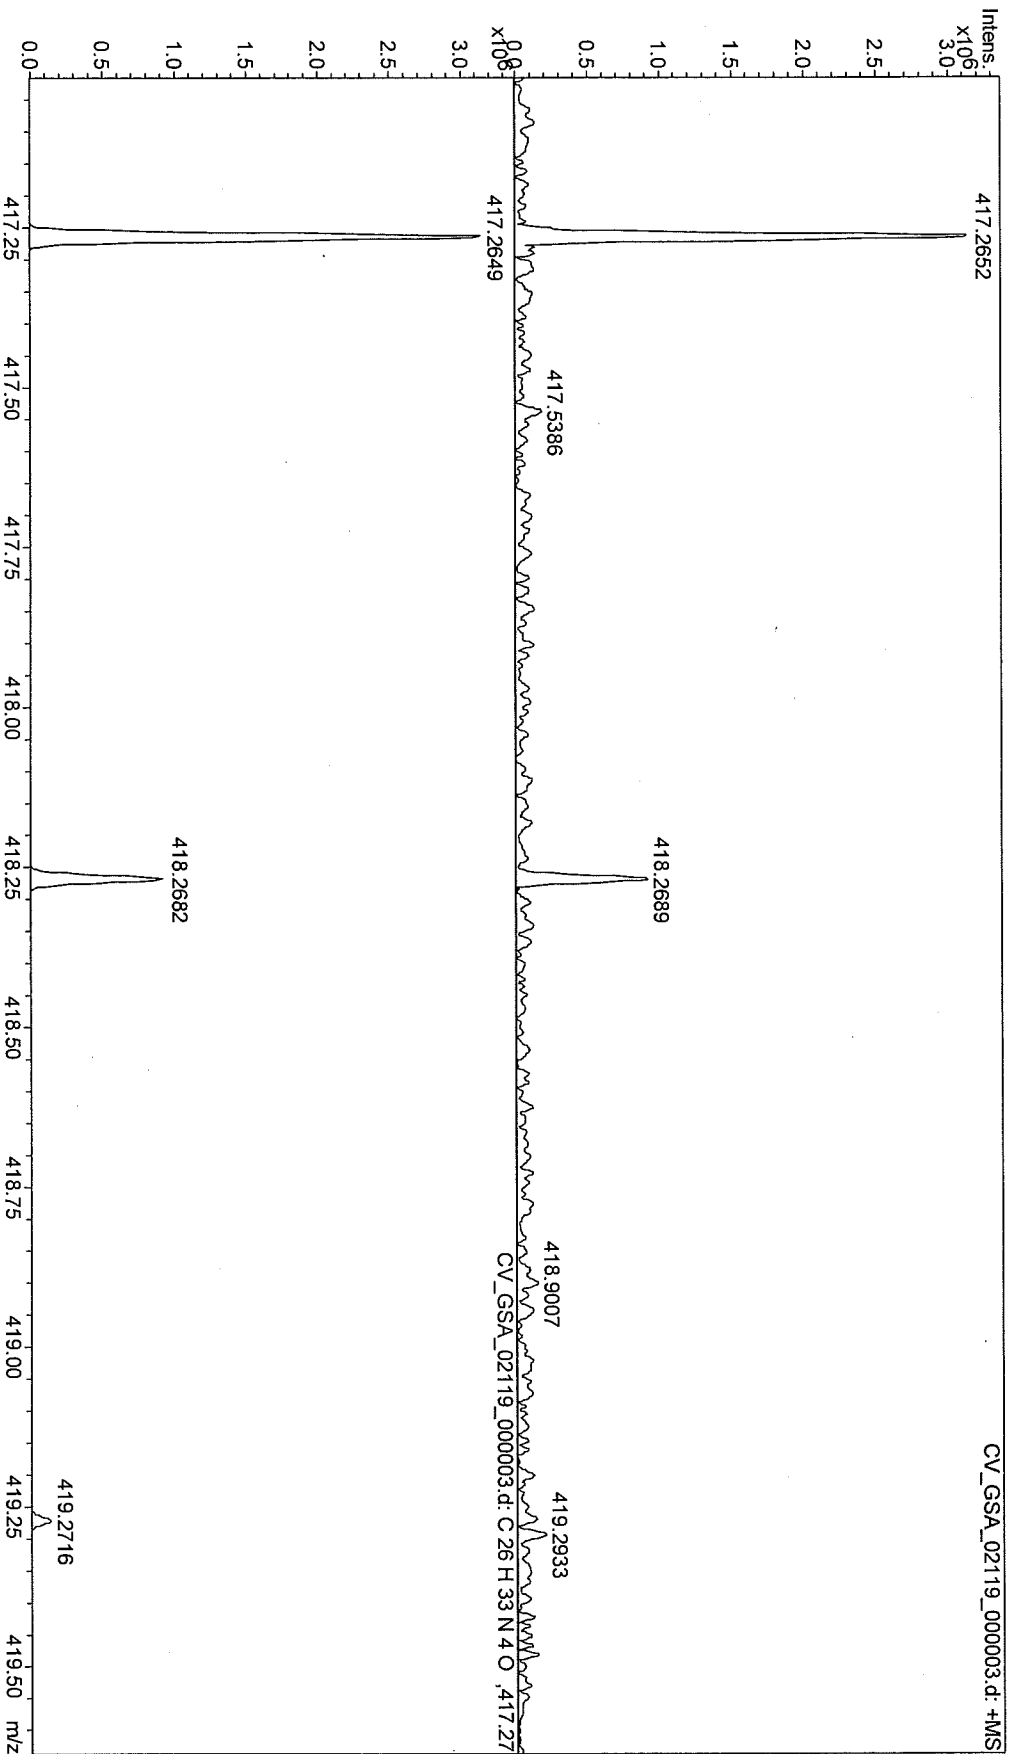

# SmartFormula Manually

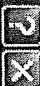

Min

C<sub>20</sub>

Generate

Max

C 20-n

Help

Note: for m < 2000 the elements C, H, N, and O are considered implicitly.

Measured m/z 417.2652

Tolerance 2

mDa

Charge 1

| Meas. m/z | #                                              | Formula                                          | Score  | m/z      | err [mDa] | err [ppm] | mSigma | rdB  | e <sub>-</sub> Conf | N-Rule |
|-----------|------------------------------------------------|--------------------------------------------------|--------|----------|-----------|-----------|--------|------|---------------------|--------|
| 417.2852  | 1                                              | C <sub>26</sub> H <sub>38</sub> N <sub>4</sub> O | 100.00 | 417.2649 | -0.4      | -0.8      | 25.3   | 12.5 | even                | ok     |
| 2         | C <sub>25</sub> H <sub>37</sub> O <sub>5</sub> |                                                  | 42.59  | 417.2636 | -1.7      | -4.0      | 28.9   | 7.5  | even                | ok     |

☐ Automatically locate monoisotopic peak Maximum number of formulas 500

☒ Check rings plus double bonds Minimum -0.5 Maximum 40

Electron configuration

☒ Filter H/C element ratio Minimum H/C 0 Maximum H/C 3

☒ Estimate carbon number ☒ Generate immediately

Show Pattern

E:\MSLab\_LC\CV-GSA-02119  
V. R. Chappeta, ACN:H2O 1:1:0.1%FA  
CV-GSA-02119 #43-44 RT: 0.85-0.87 AV: 2 NL: 4.10E6  
T: + p Full ms [50.00-900.00]

05/26/2011 04:01:35 PM

CV-GSA-02119

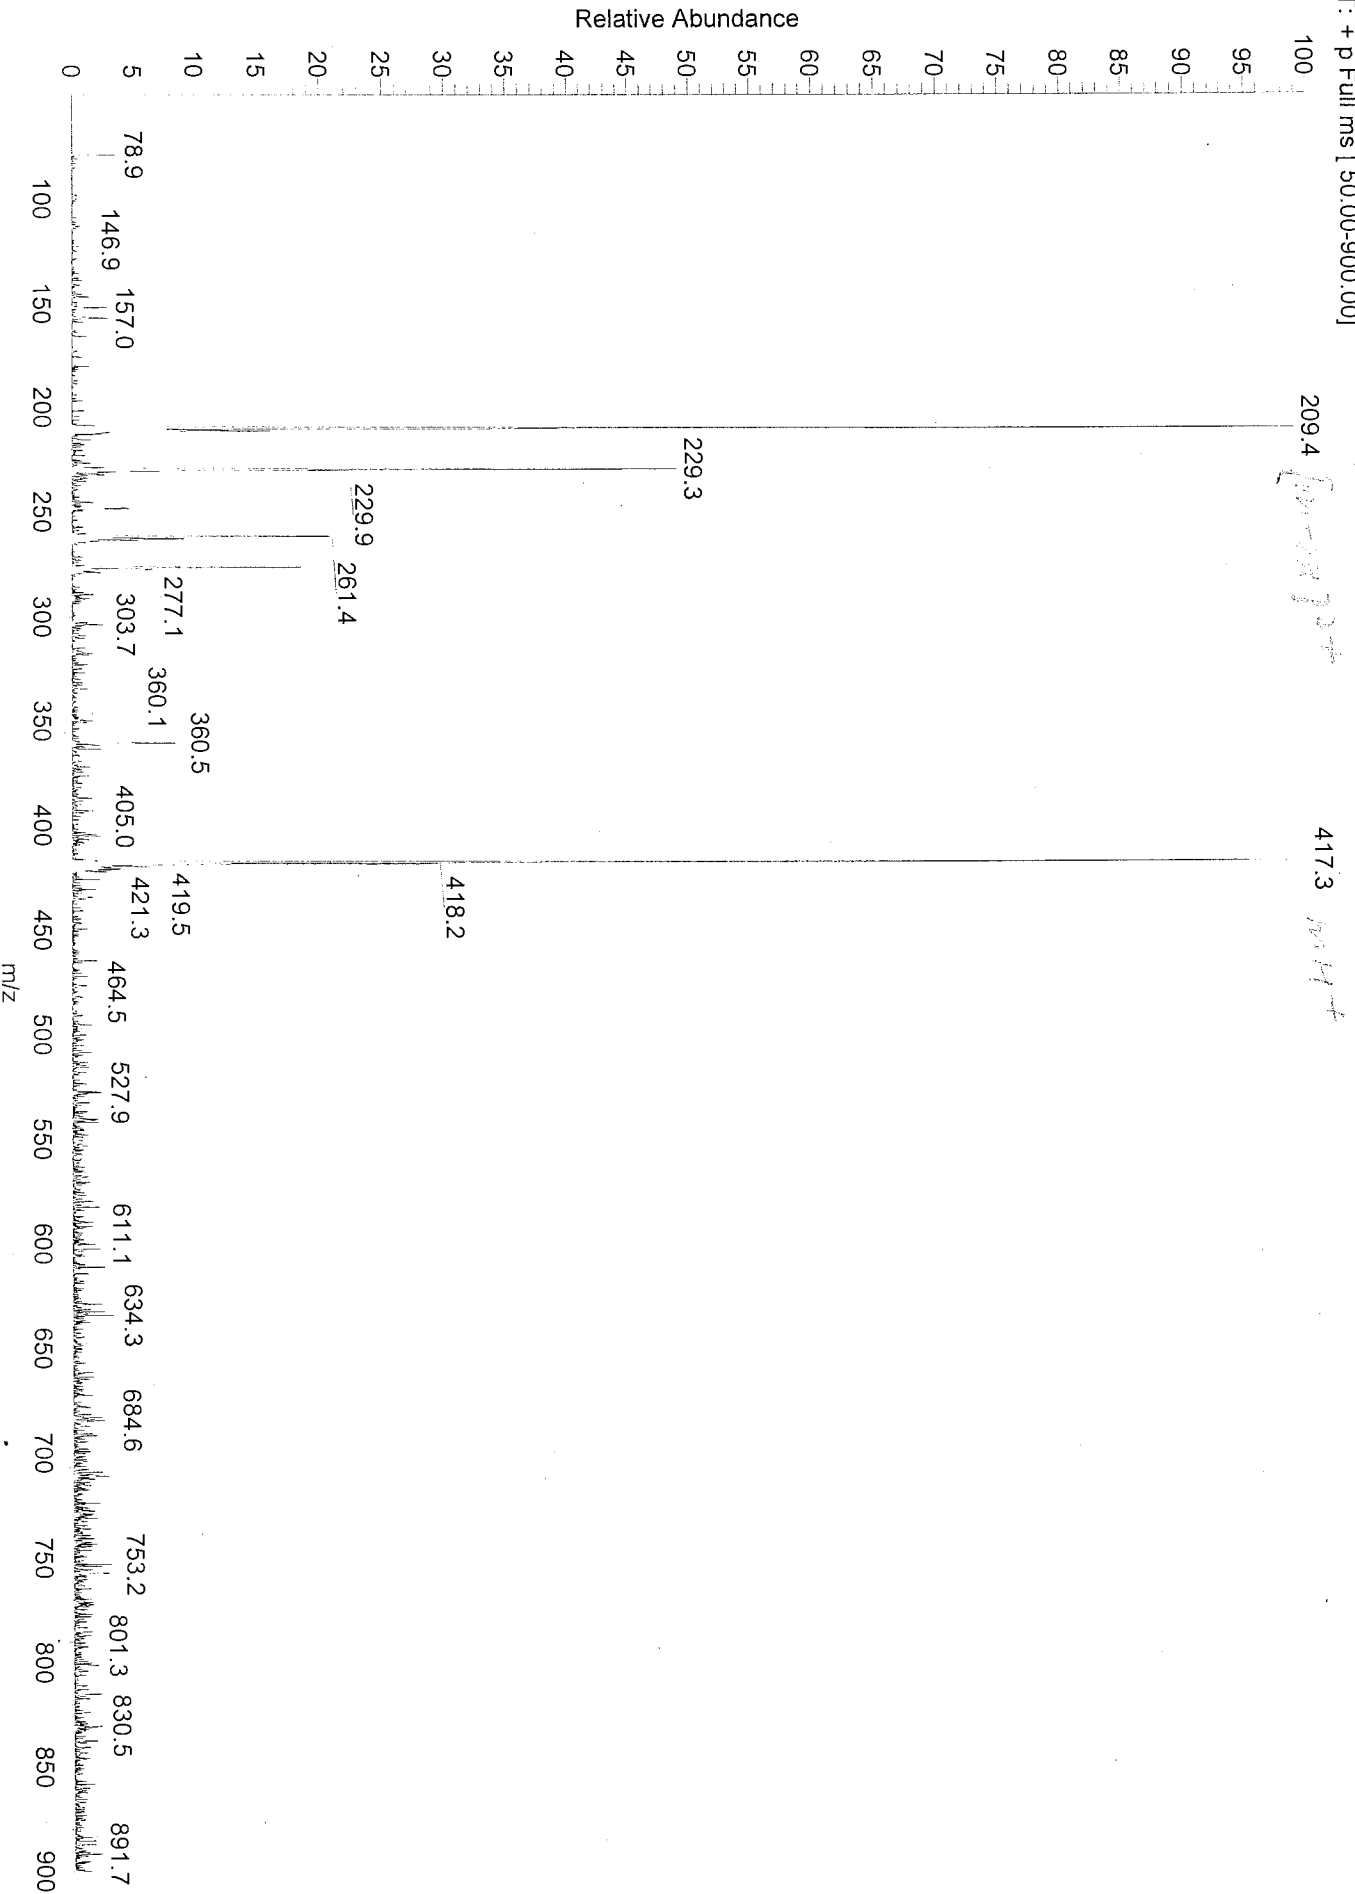

Current Data Parameters  
NAME KS-GSA-01-166 1H NMR  
EXPNO 1  
PROCNO 1

F2 - Acquisition Parameters

Date 20110622  
Time 9.20  
INSTRUM spect  
PROBHD 5 mm QNP 1H/1  
PULPROG zg30  
TD 65536  
SOLVENT CDCl3  
NS 64  
DS 2  
SWH 6172.839 Hz  
FIDRES 0.094190 Hz  
AQ 5.3084660 sec  
RG 456.1  
DW 81.000 usec  
DE 6.00 usec  
TE 300.0 K  
D1 1.00000000 sec

CHANNEL f1

NUC1 1H  
P1 8.50 usec  
PL1 0.00 dB  
SFO1 300.1318534 MHz

F2 - Processing parameters

SI 32768  
SF 300.1300000 MHz  
WDW EM  
SSB 0  
LB 0.30 Hz  
GB 0  
PC 1.00

9.698  
8.464  
8.459  
8.444  
8.439  
8.400  
8.374  
8.041  
8.039  
8.021  
7.722  
7.695  
7.619  
7.593  
7.567  
7.338  
7.312  
7.287

4.690  
4.665  
4.641

3.242  
3.236  
3.217  
2.984  
2.950  
2.775  
2.645  
2.507  
2.501  
2.030  
2.007  
1.985  
1.740  
1.207

-0.001  
-0.006

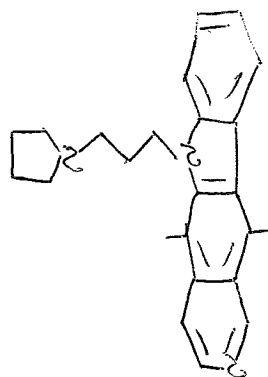

8.464  
8.459  
8.444  
8.439  
8.400  
8.374

Current Data Parameters  
NAME KS-GSA-01-166 1H NMR  
EXPNO 1  
PROCNO 1

F2 - Acquisition Parameters

Date\_ 20110622  
Time 9.20  
INSTRUM spect  
PROBHD 5 mm QNP 1H/1  
PULPROG zg30  
TD 65536  
SOLVENT CDCl3  
NS 64  
DS 2  
SWH 6172.839 Hz  
FIDRES 0.094190 Hz  
AQ 5.3084660 sec  
RG 456.1  
DW 81.000 usec  
DE 6.00 usec  
TE 300.0 K  
D1 1.00000000 sec

===== CHANNEL f1 =====

NUC1 1H  
P1 8.50 usec  
PL1 0.00 dB  
SFO1 300.1318534 MHz

F2 - Processing parameters

SI 32768  
SF 300.1300000 MHz  
WDW EM  
SSB 0  
LB 0.30 Hz  
GB 0  
PC 1.00

8.041  
8.039  
8.021

7.722  
7.695

7.619  
7.593  
7.567

7.338  
7.312  
7.287

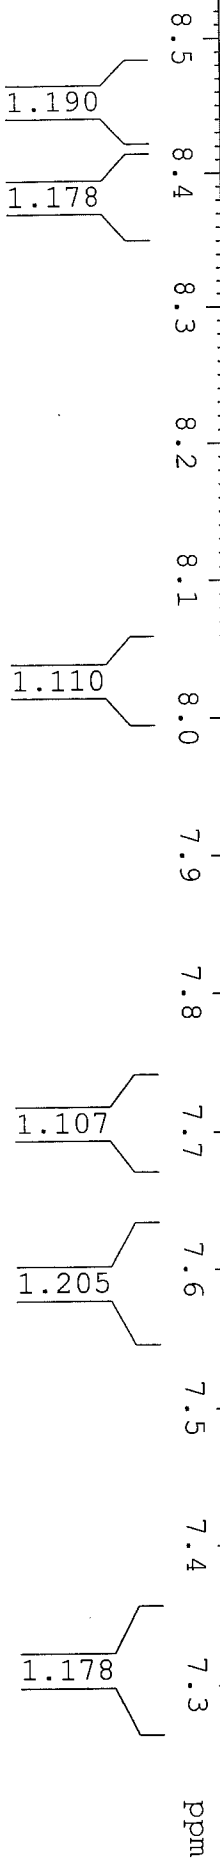

Current Data Parameters  
NAME RS-GSA-01-166 1H NMR  
EXPNO 1  
PROCNO 1

F2 - Acquisition Parameters  
Date\_ 20110622  
Time 9.20

INSTRUM 5 mm QNP 1H/1  
PROBHD zg30  
PULPROG zg30  
TD 65536  
SOLVENT CDCl3  
NS 2  
DS 2  
SWH 6172.839 Hz  
FIDRES 0.094190 Hz  
AQ 5.308460 sec  
RG 436.1  
RG 81.000 usec  
DE 6.00 usec  
TE 300.0 K  
D1 1.00000000 sec

===== CHANNEL f1 =====  
NUC1 1H  
P1 8.50 usec  
PL1 0.00 dB  
SFO1 300.1318534 MHz  
F2 - Processing parameters  
SI 32768  
SF 300.1300000 MHz  
WDW EM  
SSB 0  
GB 0  
PC 1.00

4.690  
4.665  
4.641

3.242  
3.236  
3.217

2.984  
2.950

2.775

2.645

2.507  
2.501

2.030  
2.007  
1.985

1.740

1.207

2.171

3.508

3.331

6.000

2.331

4.302

\* DMSO

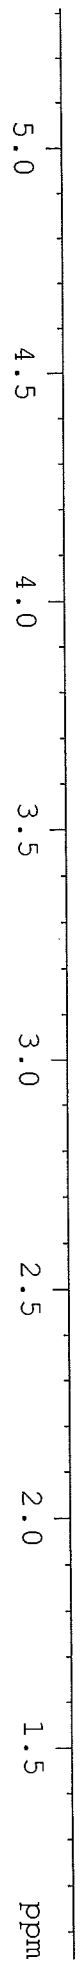

Current Data Parameters  
NAME KS-GSA-01-166.13C  
EXPNO 1  
PROCNO 1

F2 - Acquisition Parameters

Date\_ 20110622  
Time\_ 8.54  
INSTRUM spect  
PROBHD 5 mm QNP 1H/1  
PULPROG zgpg30  
TD 65536  
SOLVENT DMSO  
NS 16000  
DS 4  
SWH 17985.611 Hz  
FIDRES 0.274439 Hz  
AQ 1.8219508 sec  
RG 645.1  
RW 27.800 usec  
DE 6.00 usec  
TE 300.0 K  
D1 2.00000000 sec  
d11 0.03000000 sec  
d12 0.00002000 sec

CHANNEL F1  
NUC1 13C  
P1 6.00 usec  
PL1 2.00 dB  
SFO1 75.4752653 MHz

CHANNEL F2  
CPDPRG2 waltz16  
NUC2 1H  
PCPD2 80.00 usec  
PL2 0.00 dB  
PL12 19.47 dB  
PL13 19.00 dB  
SFO2 300.1312005 MHz

F2 - Processing Parameters  
SI 32768  
SF 75.4677190 MHz  
WDW EM  
SSB 0  
LB 1.00 Hz  
GB 0  
PC 1.00

150.435  
144.959  
141.806  
140.947  
134.542  
129.287  
128.101  
125.079  
124.723  
123.692  
123.054  
120.666  
116.810  
110.253  
109.573

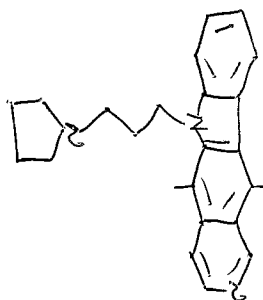



Current Data Parameters  
NAME KS-GSA-01-166 13C  
EXPNO 1  
PROCNO 1

F2 - Acquisition Parameters

Date 20110622  
Time 8.54  
INSTRUM spect  
PROBHD 5 mm QNP 1H/1  
PULPROG zgpg30  
TD 65536  
SOLVENT DMSO  
NS 16000  
DS 4  
SWH 17985.611 Hz  
FIDRES 0.274439 Hz  
AQ 1.8219508 sec  
RG 645.1  
RG 27.800 usec  
DE 6.00 usec  
TE 300.0 K  
D1 2.0000000 sec  
d11 0.0300000 sec  
d12 0.0002000 sec

===== CHANNEL f1 =====

NUC1 13C  
P1 6.00 usec  
PL1 2.00 dB  
SFO1 75.4752653 MHz

===== CHANNEL f2 =====

CPDPRG2 waltz16  
NUC2 1H  
PCPD2 80.00 usec  
PL2 0.00 dB  
PL12 19.47 dB  
PL13 19.00 dB  
SFO2 300.1312005 MHz

F2 - Processing Parameters

SF 52768  
SE 75.4677190 MHz  
WDR 0  
SSB 0  
GB 1.00 Hz  
PC 1.00

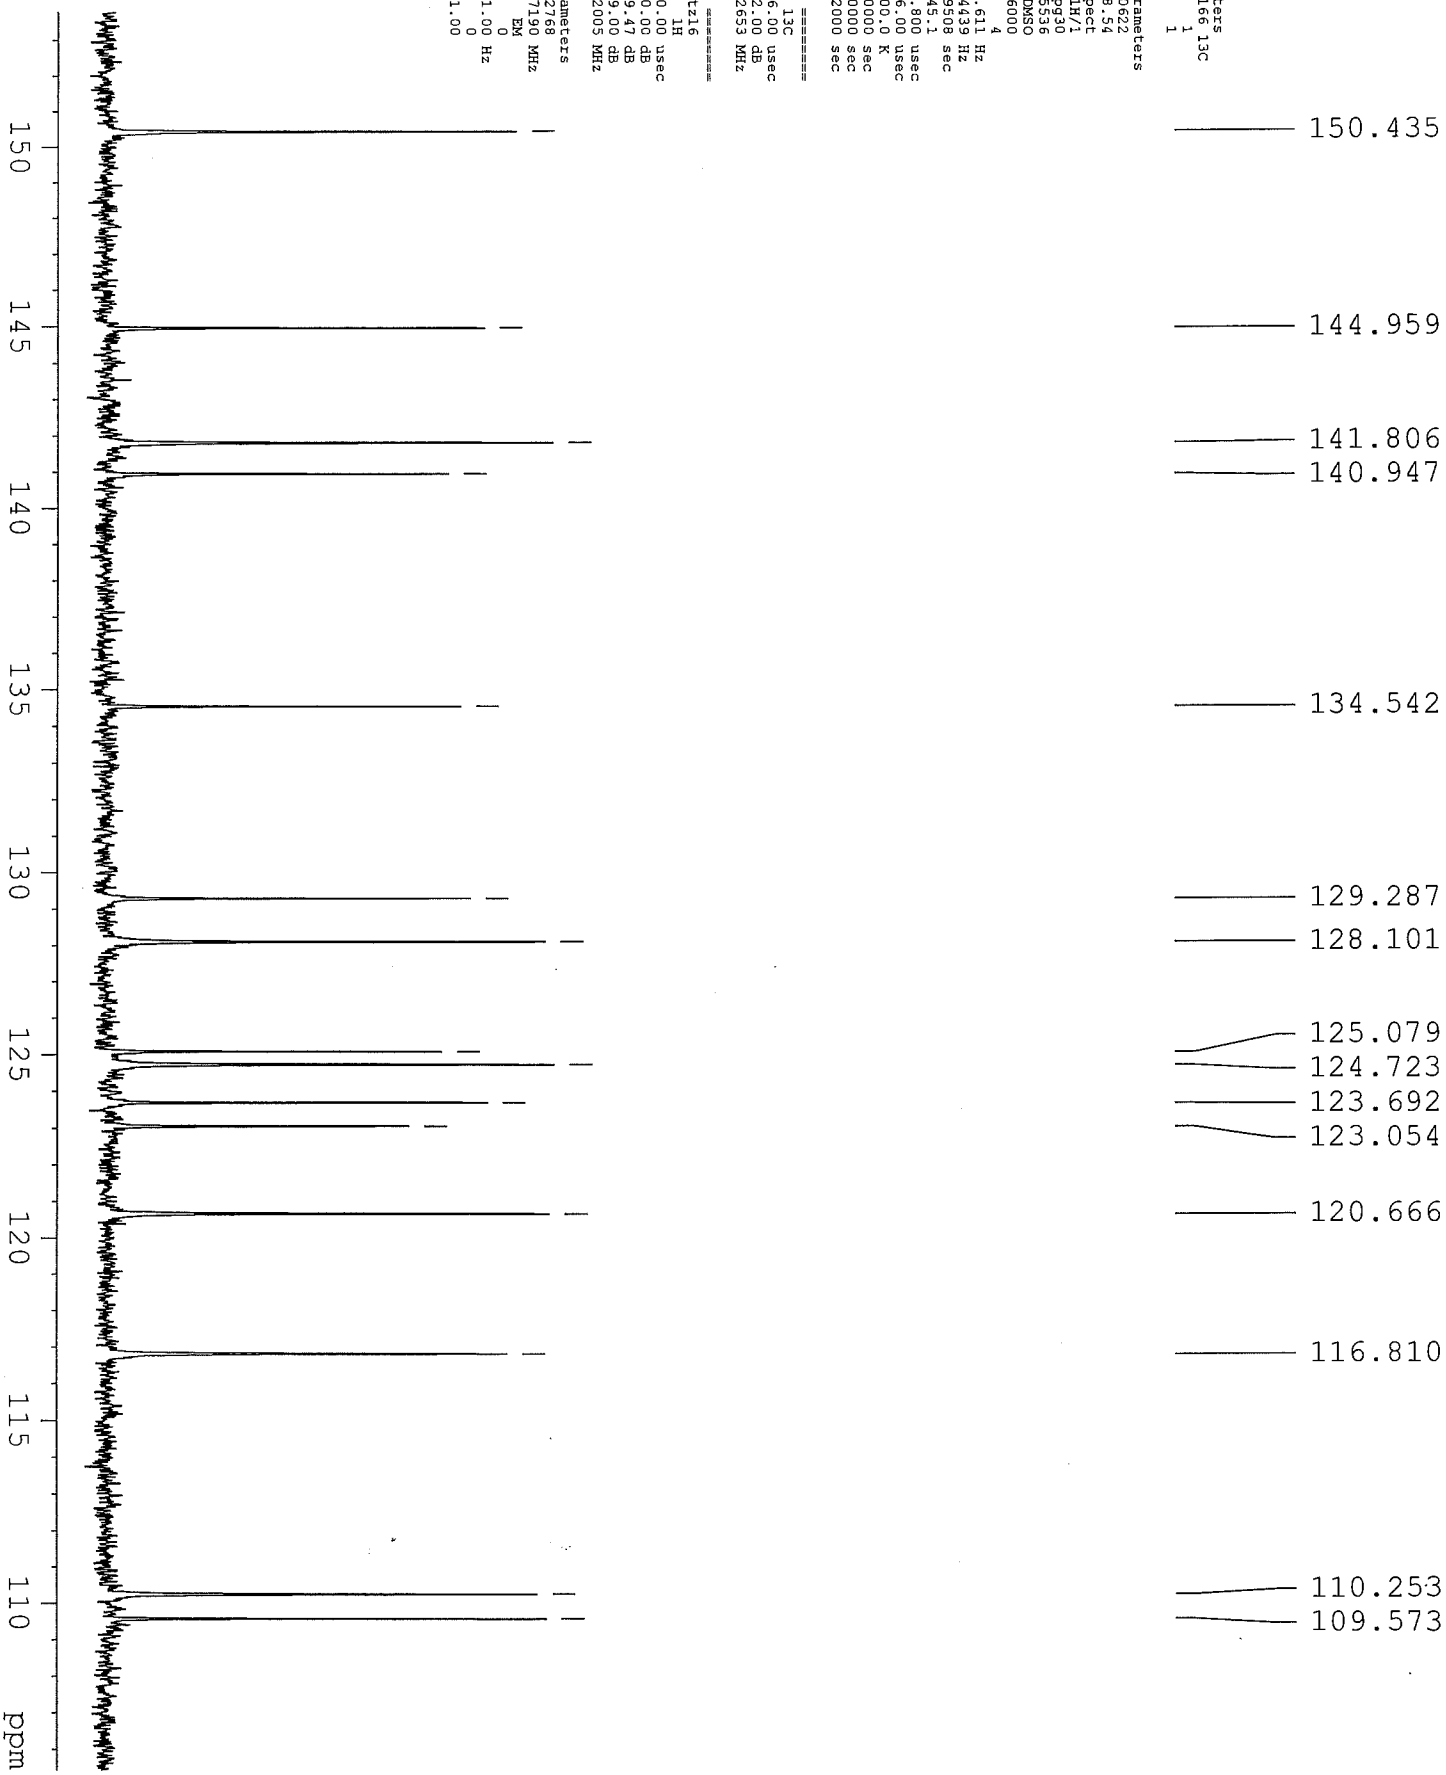

=====  
Injection Date : 6/20/2011 4:58:56 PM  
Sample Name : KS-GSA-01-166 Location : Vial 105  
Acq. Operator : Karen Inj : 1  
Acq. Instrument : Instrument 1 Inj Volume : 0.1 µl  
Method : C:\HPCHEM\1\METHODS\LC\_MS\_UV.M  
Last changed : 6/20/2011 5:09:49 PM by Karen  
(modified after loading)

Zorbax SB C18, 150 x 4.6, 3.5µ, 40/60/0.25, MeOH/water/formic, POS, 150-600; frag 70; 25C, cap  
volt 2500, gas temp 350; drying gas 10

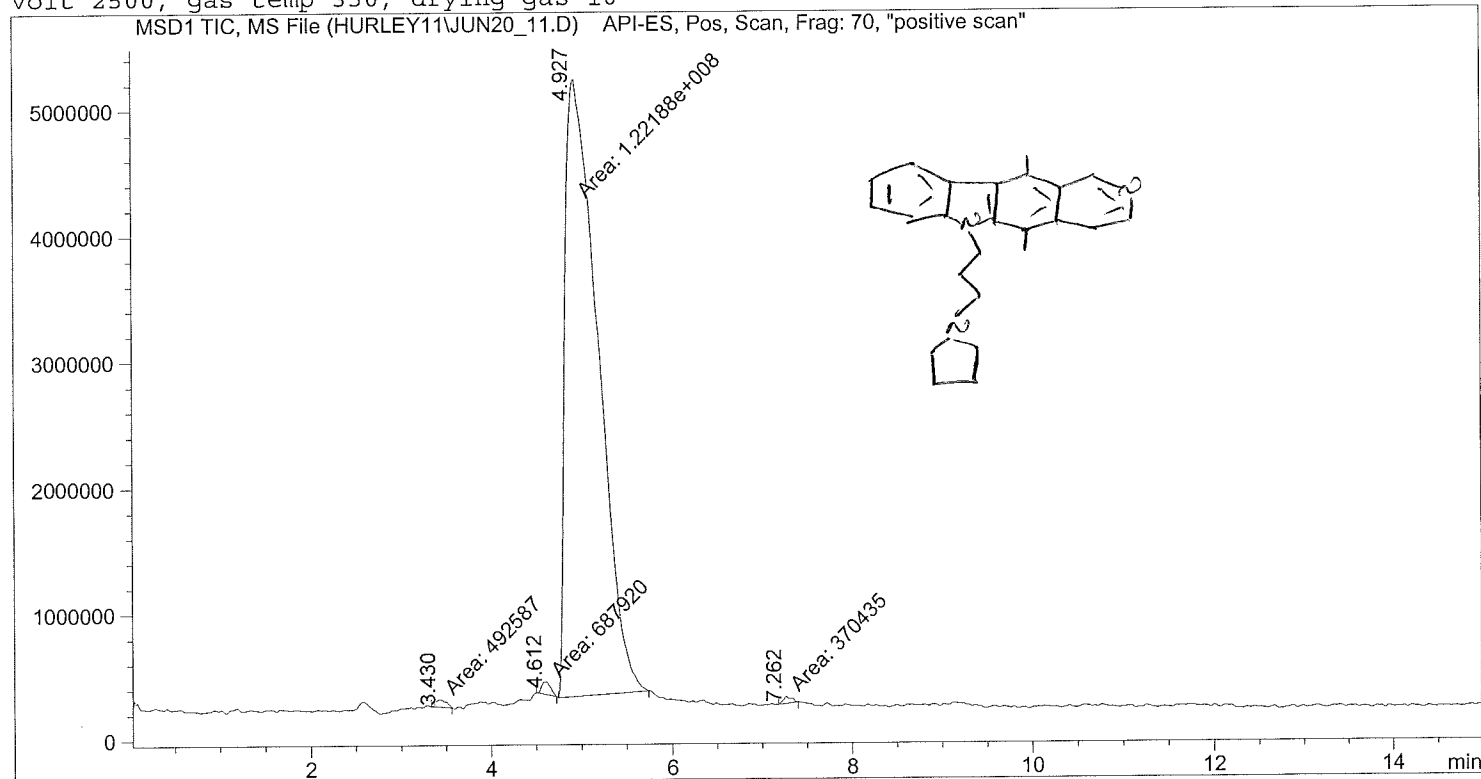

=====  
Area Percent Report  
=====

Sorted By : Signal  
Multiplier : 1.0000  
Dilution : 1.0000  
Use Multiplier & Dilution Factor with ISTDs

Signal 1: MSD1 TIC, MS File

| Peak # | RetTime [min] | Type | Width [min] | Area      | Height    | Area %  |
|--------|---------------|------|-------------|-----------|-----------|---------|
| 1      | 3.430         | MM   | 0.1352      | 4.92587e5 | 6.07403e4 | 0.3981  |
| 2      | 4.612         | MM   | 0.1131      | 6.87920e5 | 1.01330e5 | 0.5559  |
| 3      | 4.927         | MM   | 0.4146      | 1.22188e8 | 4.91153e6 | 98.7466 |
| 4      | 7.262         | MM   | 0.1048      | 3.70435e5 | 5.89016e4 | 0.2994  |

Totals : 1.23739e8 5.13250e6

=====  
\*\*\* End of Report \*\*\*

```
=====
Injection Date   : 6/20/2011 4:58:56 PM
Sample Name      : KS-GSA-01-166
Acq. Operator    : Karen
Acq. Instrument  : Instrument 1
Method           : C:\HPCHEM\1\METHODS\LC_MS_UV.M
Last changed     : 6/20/2011 5:09:49 PM by Karen
                  (modified after loading)
Zorbax SB C18,150 x 4.6, 3.5u,40/60/0.25,MeOH/water/formic, POS, 150-600; frag 70; 25C, cap volt
2500, gas temp 350; drying gas 10
=====
```

Current Chromatogram(s)

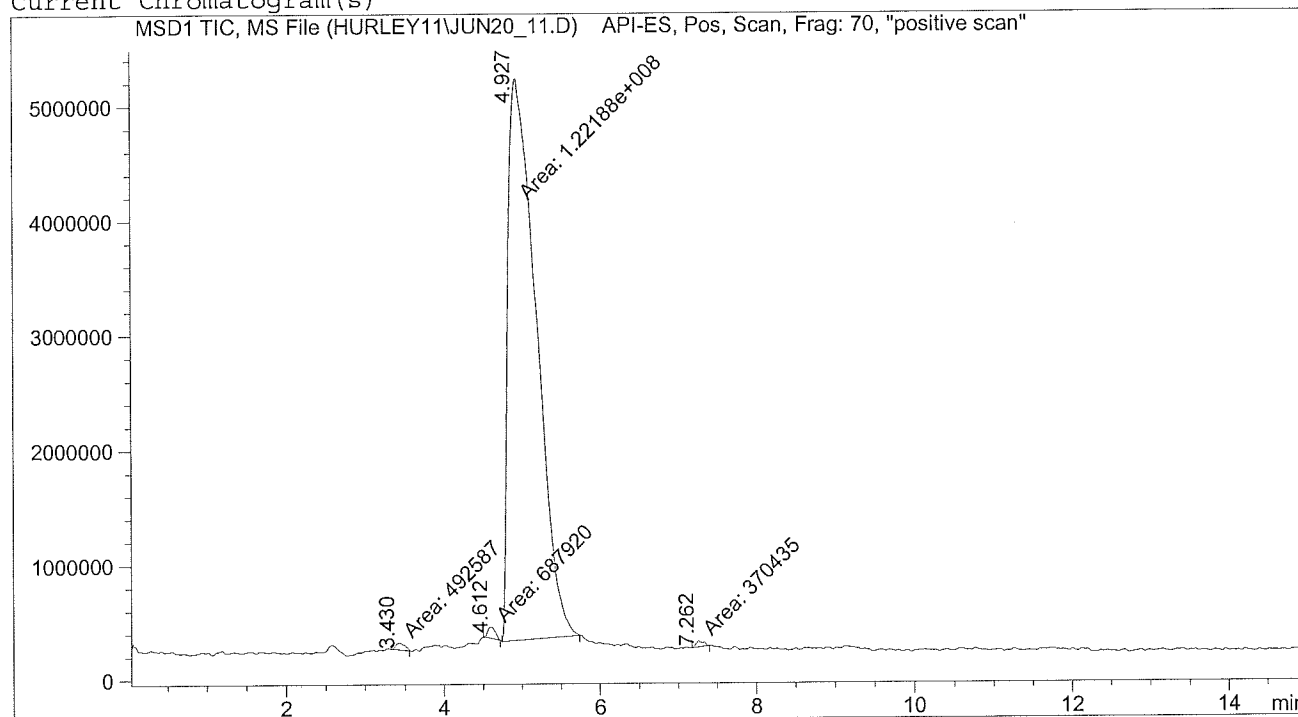

Apex Mass Spectrum of Peak 3.43 of JUN20\_11.D

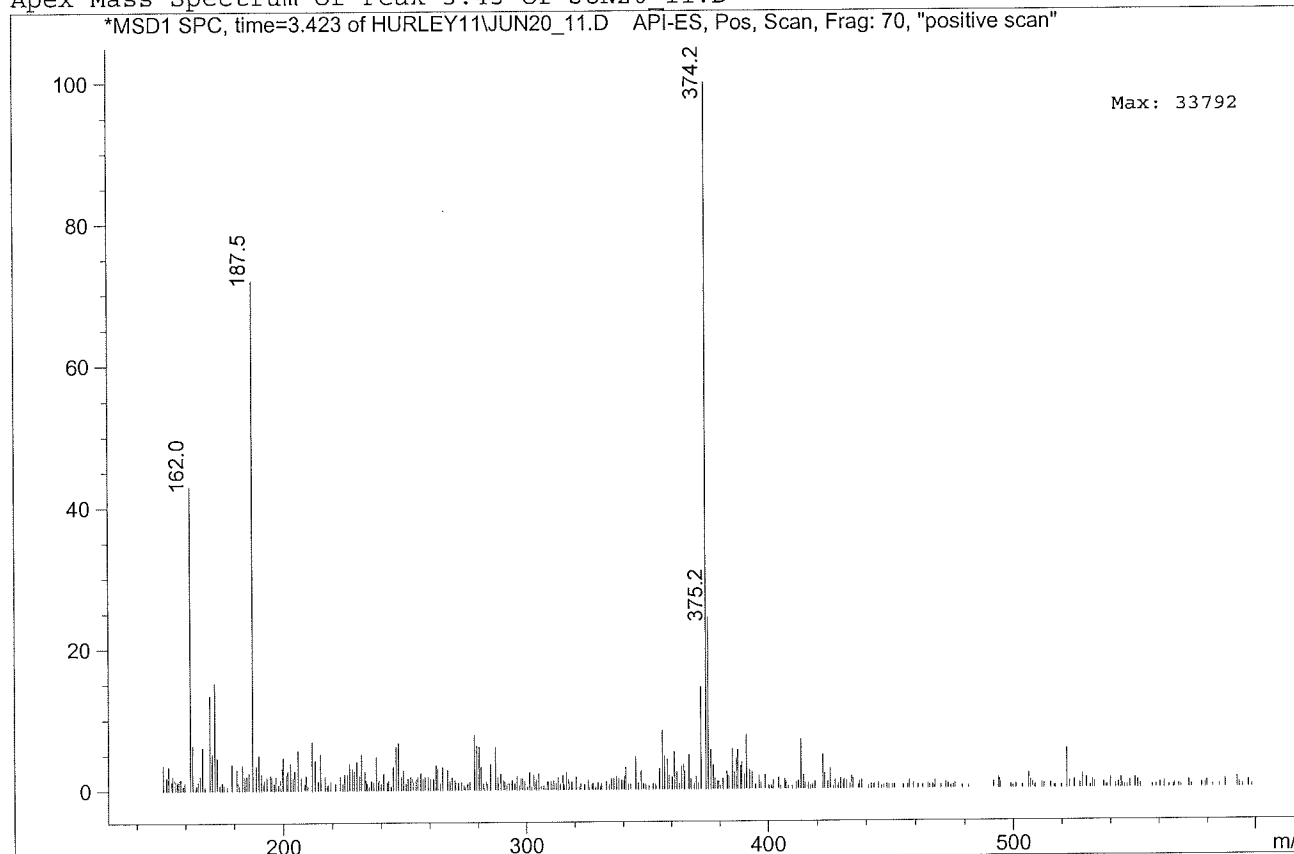

```
=====
Injection Date   : 6/20/2011 4:58:56 PM
Sample Name      : KS-GSA-01-166
Acq. Operator    : Karen
Acq. Instrument  : Instrument 1
Method           : C:\HPCHEM\1\METHODS\LC_MS_UV.M
Last changed     : 6/20/2011 5:09:49 PM by Karen
                  (modified after loading)
Zorbax SB C18,150 x 4.6, 3.5u,40/60/0.25,MeOH/water/formic, POS, 150-600; frag 70; 25C,
cap volt 2500, gas temp 350; drying gas 10
=====
```

Current Chromatogram(s)

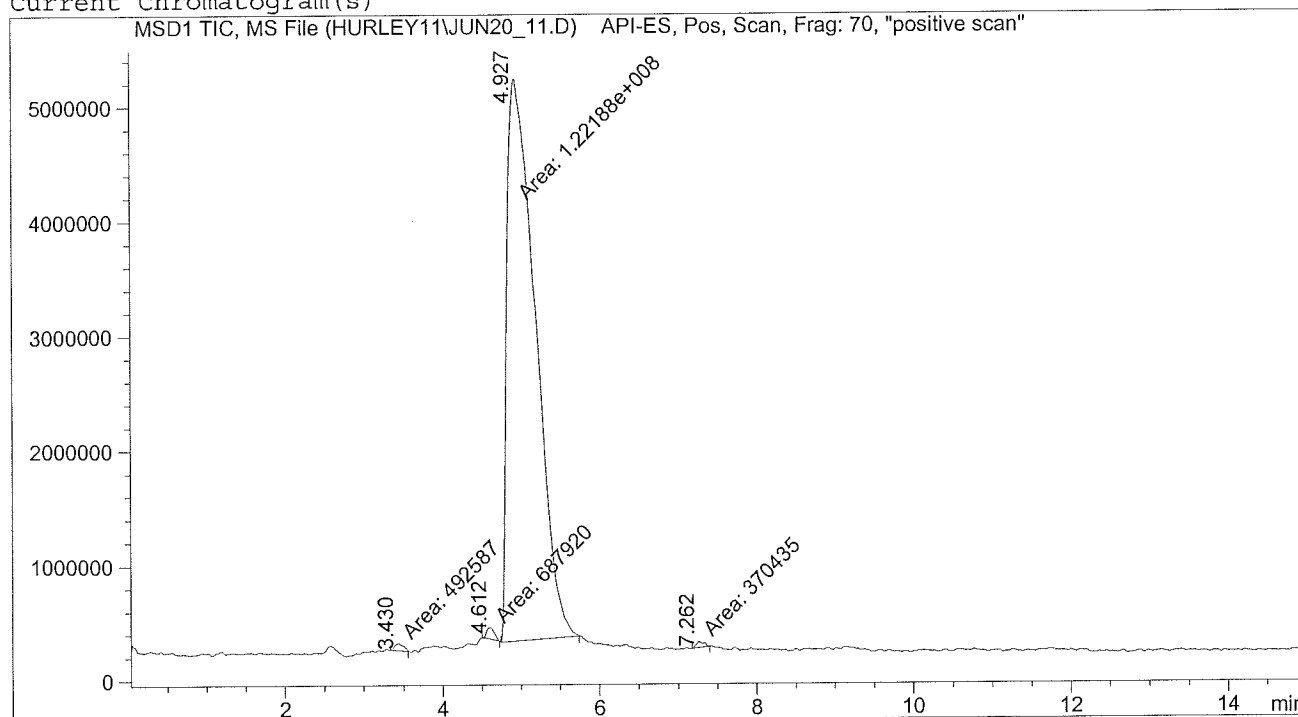

Apex Mass Spectrum of Peak 4.612 of JUN20\_11.D

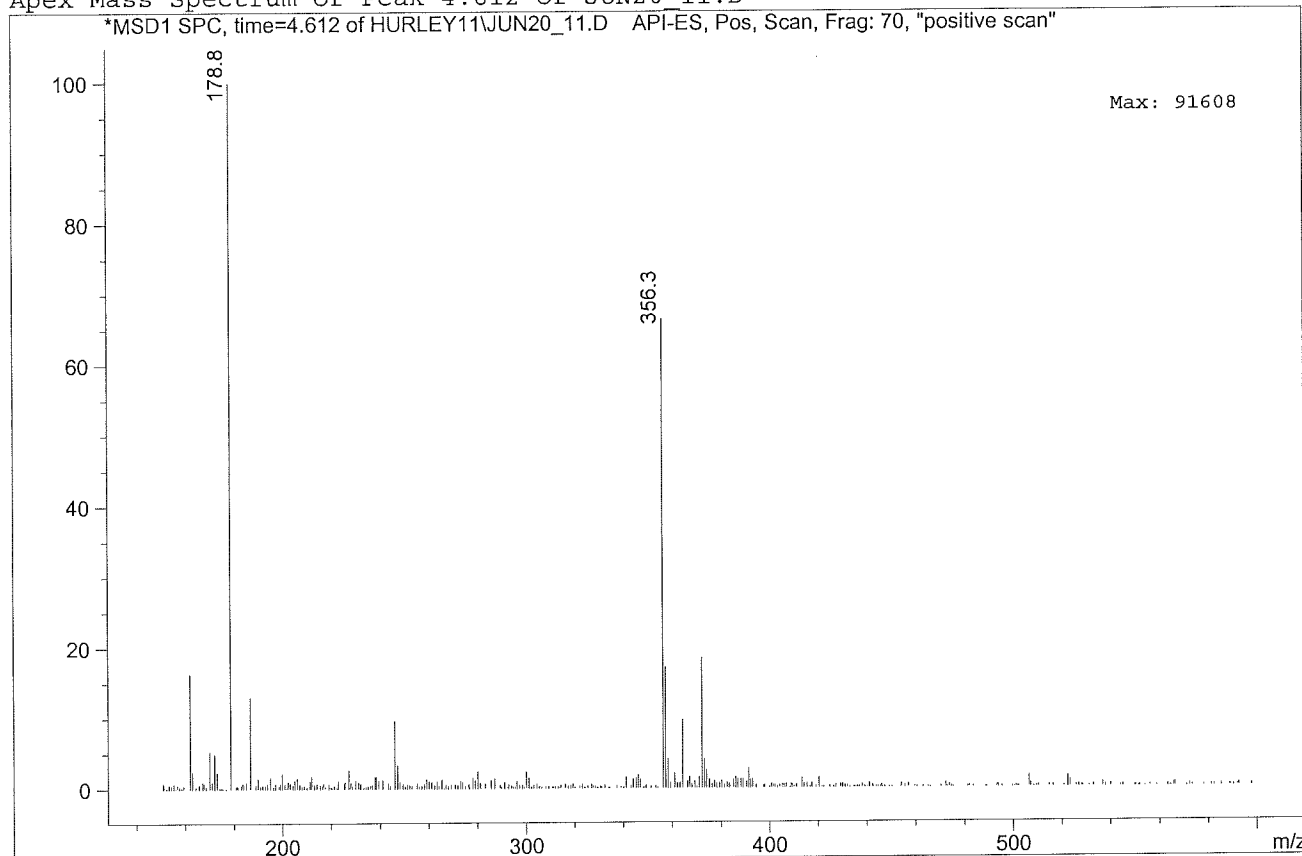

```
=====
Injection Date   : 6/20/2011 4:58:56 PM
Sample Name      : KS-GSA-01-166
Acq. Operator    : Karen
Acq. Instrument  : Instrument 1
Method           : C:\HPCHEM\1\METHODS\LC_MS_UV.M
Last changed     : 6/20/2011 5:09:49 PM by Karen
                  (modified after loading)
Zorbax SB C18,150 x 4.6, 3.5u,40/60/0.25,MeOH/water/formic, POS, 150-600; frag 70; 25C,
cap volt 2500, gas temp 350; drying gas 10
=====
```

Current Chromatogram(s)

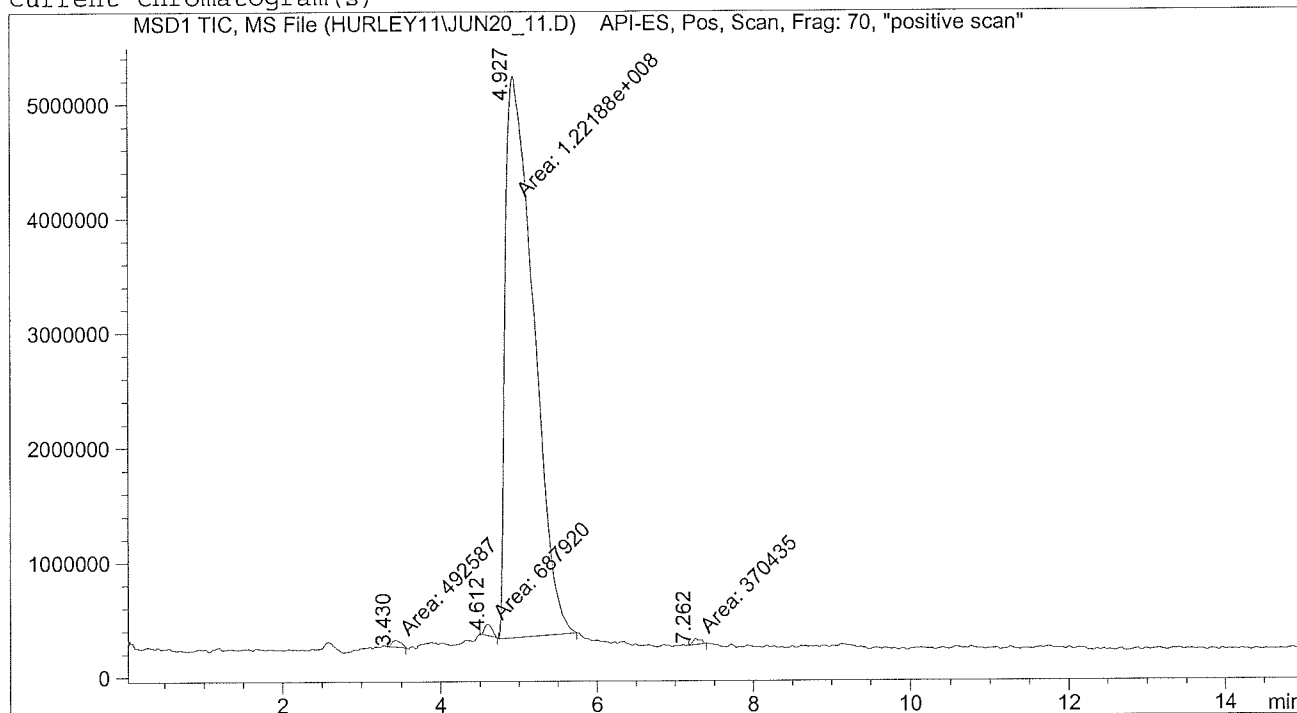

Apex Mass Spectrum of Peak 4.927 of JUN20\_11.D

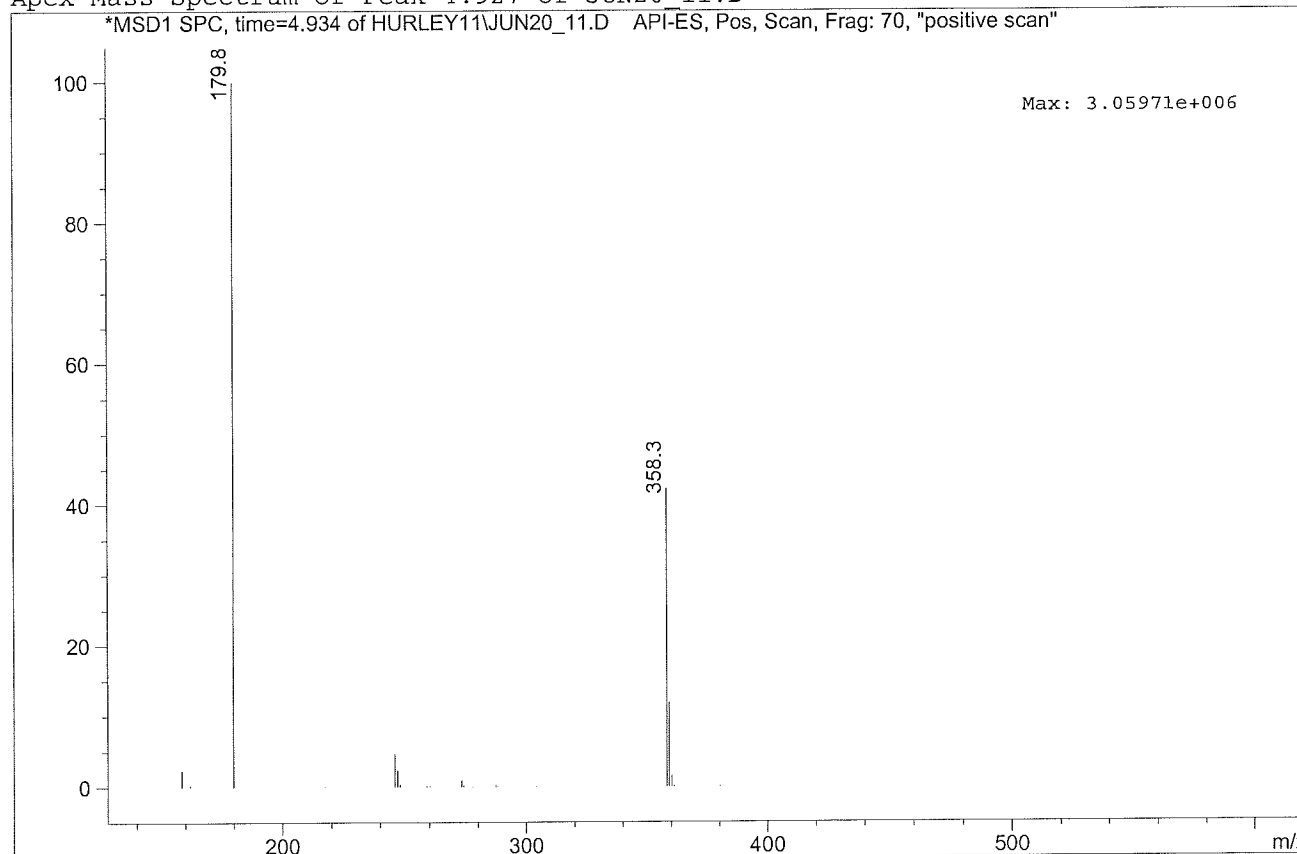

```
=====
Injection Date   : 6/20/2011 4:58:56 PM
Sample Name      : KS-GSA-01-166
Acq. Operator    : Karen
Acq. Instrument  : Instrument 1
Method           : C:\HPCHEM\1\METHODS\LC_MS_UV.M
Last changed     : 6/20/2011 5:09:49 PM by Karen
                  (modified after loading)
Zorbax SB C18,150 x 4.6, 3.5u,40/60/0.25,MeOH/water/formic, POS, 150-600; frag 70; 25C,
cap volt 2500, gas temp 350; drying gas 10
=====
```

Current Chromatogram(s)

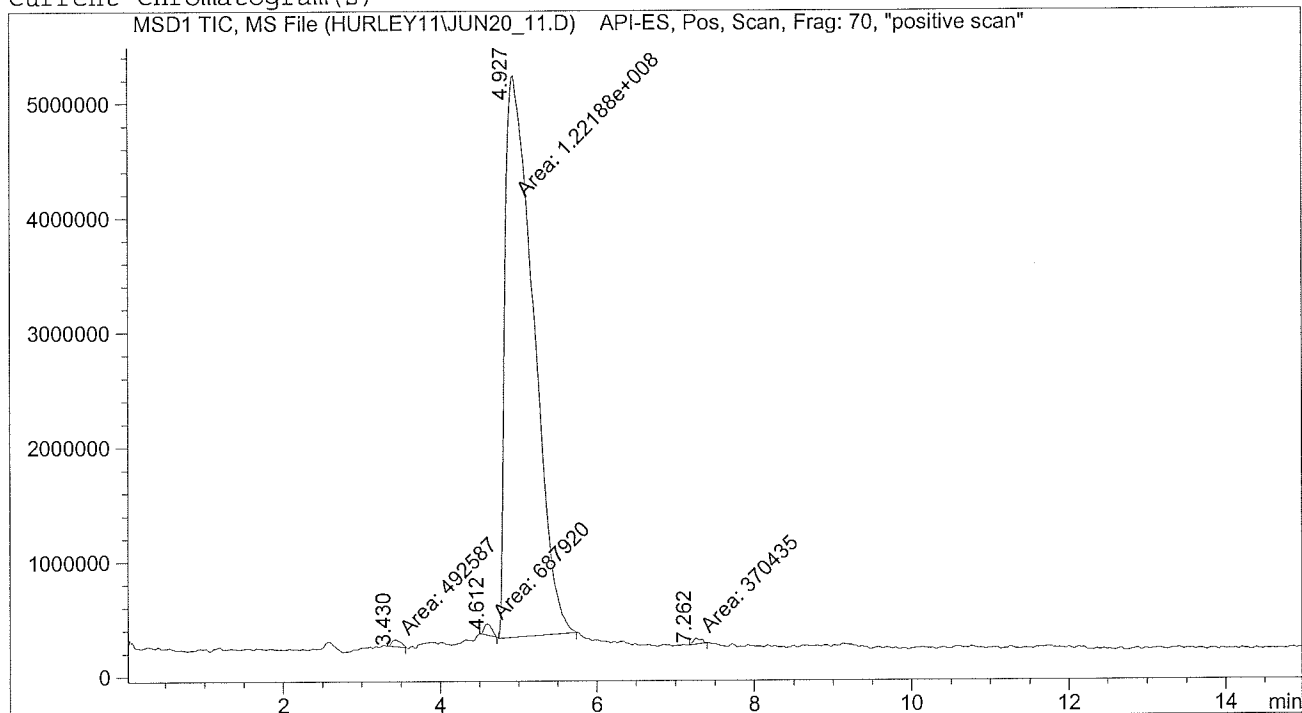

Apex Mass Spectrum of Peak 7.262 of JUN20\_11.D

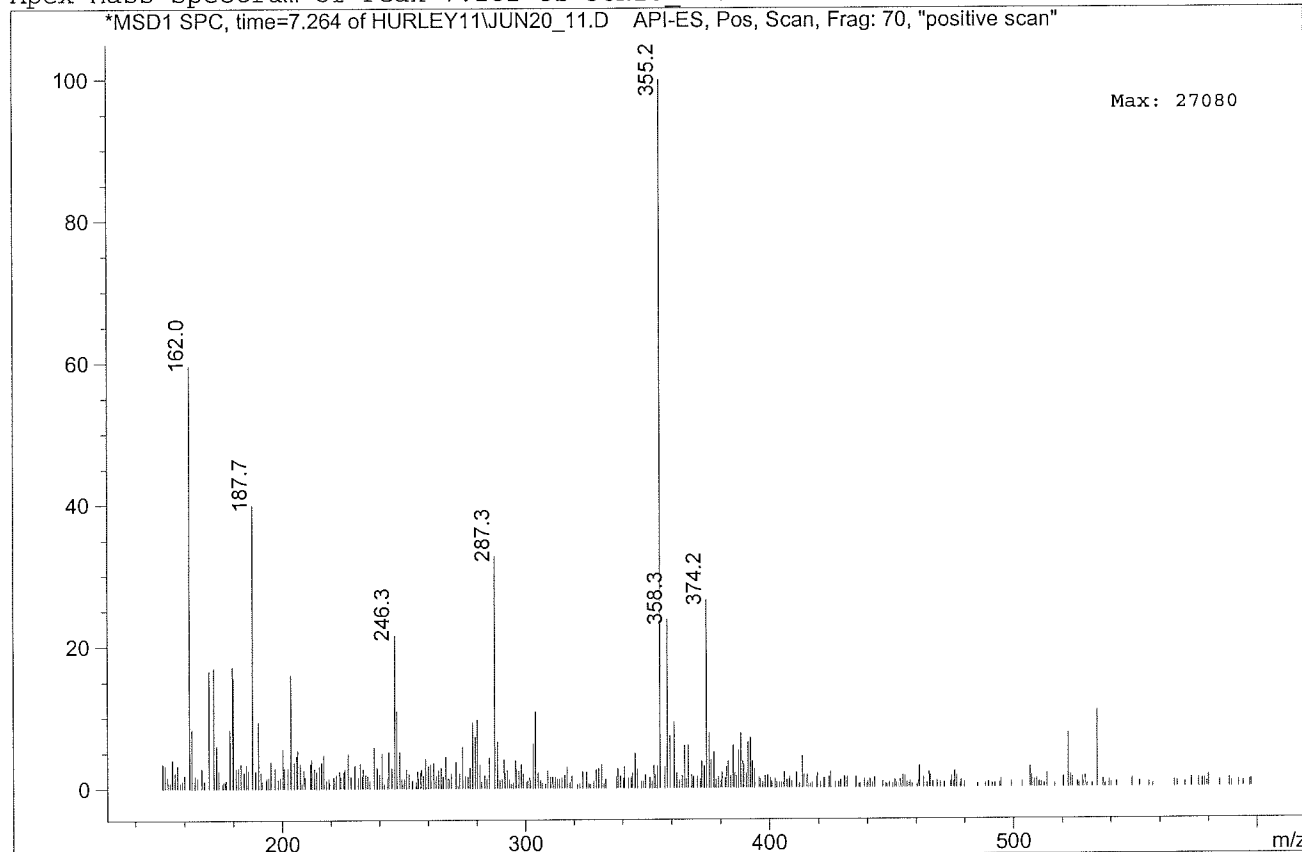



# Generic Display Report (all)

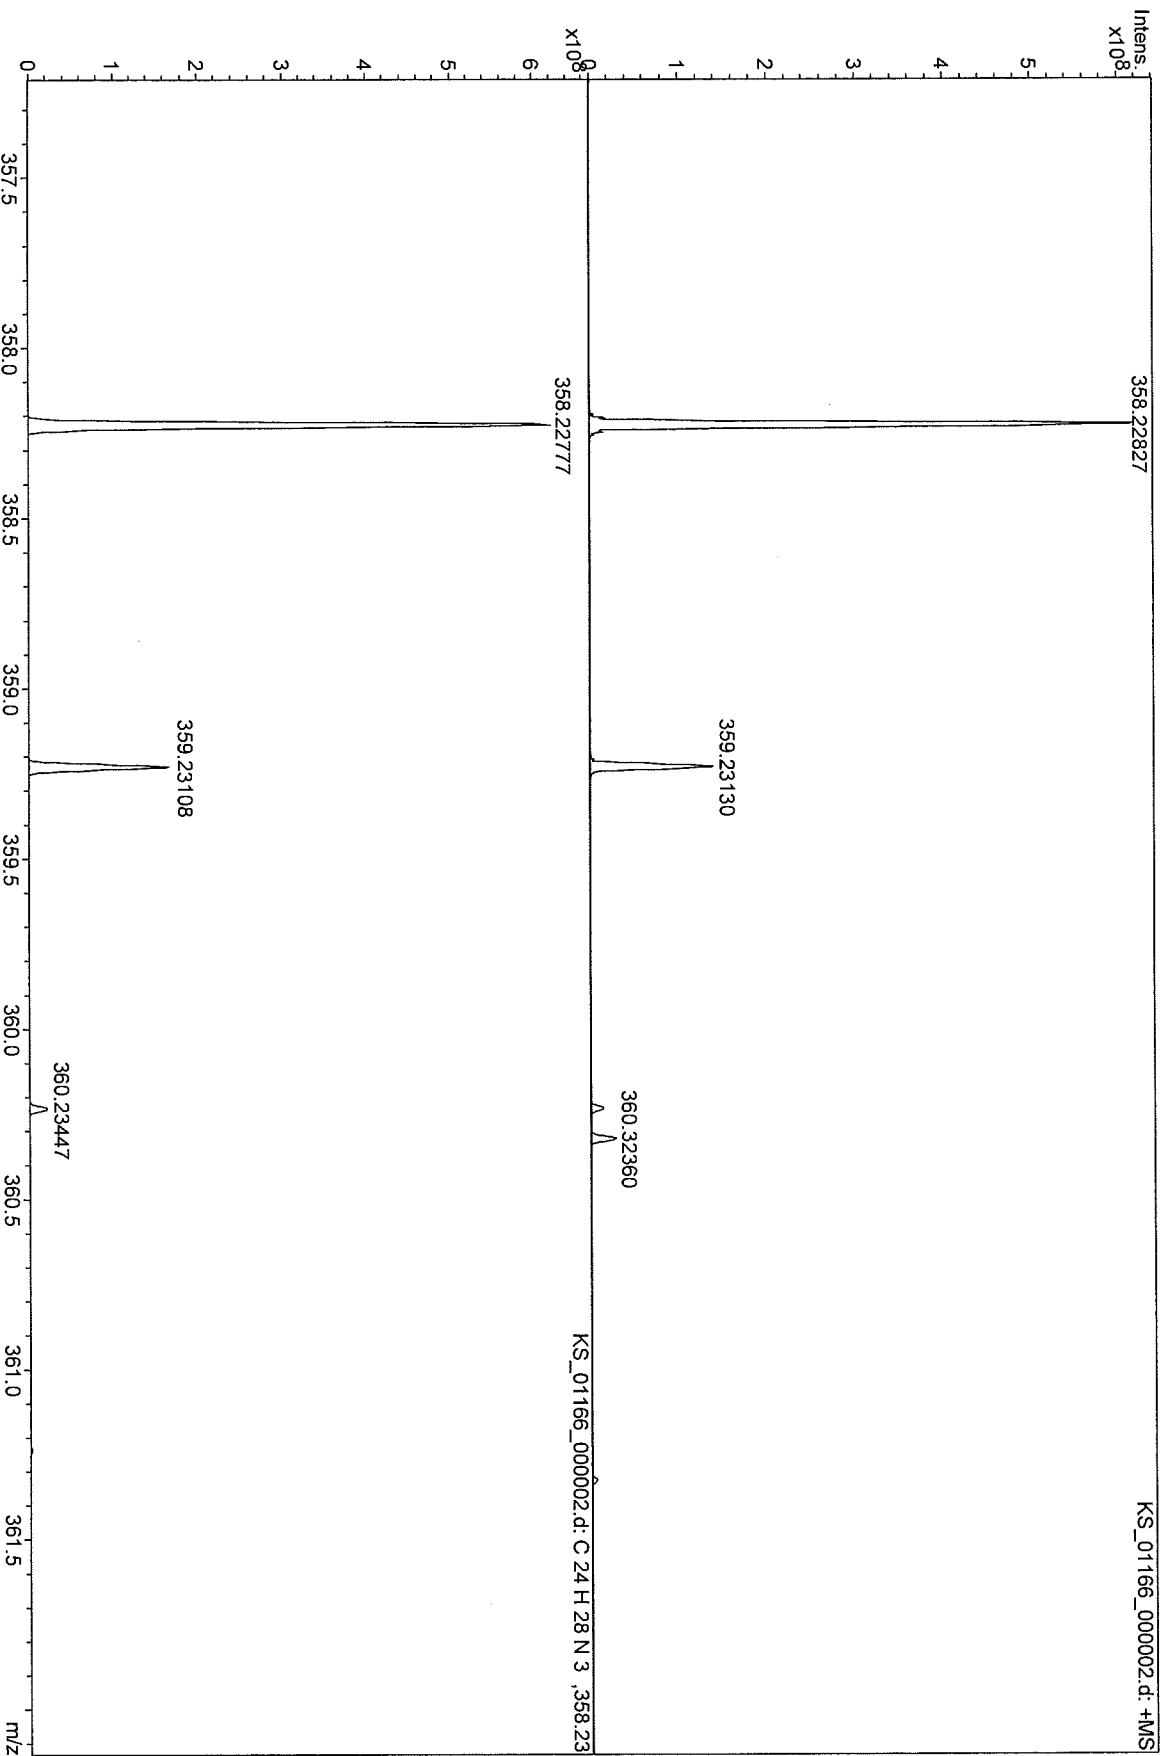



## SmartFormula Manually

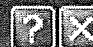

Min

C20H25N2

Generate

Max

C 20-n, H 25-n, N 2-n

Help

Note: for  $m < 2000$  the elements C, H, N, and O are considered implicitly.

Measured  $m/z$ 

358.22827

Tolerance

2

ppm

Charge

1

| Meas. $m/z$ | # | Formula               | Score  | $m/z$     | err [mDa] | err [ppm] | mSigma | rdb  | e <sup>-</sup> Conf | N-Rule |
|-------------|---|-----------------------|--------|-----------|-----------|-----------|--------|------|---------------------|--------|
| 358.22827   | 1 | <chem>C24H28N3</chem> | 100.00 | 358.22777 | -0.5      | -1.4      | 26.2   | 12.5 | even                | ok     |

☐ Automatically locate monoisotopic peak

Maximum number of formulas

500

☒ Check rings plus double bonds

Minimum

-0.5

Maximum

40

Electron configuration

even

☒ Filter H/C element ratio

Minimum H/C

0

Maximum H/C

3

☐ Estimate carbon number☒ Generate immediately

Show Pattern

Current Data Parameters  
 NAME KS-GSA-01-16 H1  
 EXPNO 7  
 PROCNO 1

F2 - Acquisition Parameters

Date\_ 20110610  
 Time 15.43  
 INSTRUM spect  
 PROBHD 5 mm QNP 1H/1  
 PULPROG zg30  
 TD 65536  
 SOLVENT DMSO  
 NS 64  
 DS 2  
 SMH 6172.839 Hz  
 FIDRES 0.094190 Hz  
 AQ 5.3084660 sec  
 RG 406.4  
 DM 81.000 usec  
 DE 6.00 usec  
 TE 300.0 K  
 D1 1.00000000 sec

===== CHANNEL f1 =====

NUC1 1H  
 P1 8.50 usec  
 PL1 0.00 dB  
 SFO1 300.1318534 MHz  
 F2 - Processing parameters  
 SI 32768  
 SF 300.1300000 MHz  
 WDW EM  
 SSB 0  
 GB 0  
 PC 1.00

9.690  
 9.672  
 8.459  
 8.449  
 8.438  
 8.421  
 8.389  
 8.363  
 8.022  
 8.002  
 7.673  
 7.646  
 7.615  
 7.591  
 7.565  
 7.330  
 7.305  
 7.282

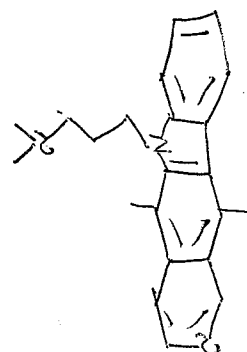

4.631  
 4.606  
 4.583

3.204  
 2.968  
 2.504  
 2.279  
 2.257  
 2.236  
 2.136  
 2.120  
 2.096  
 1.904  
 1.882  
 1.860

0.000  
 -0.010  
 -0.017

1.000  
 1.037  
 1.000  
 1.005  
 2.031  
 1.014

1.970

3.128  
 3.012

2.076  
 5.950  
 2.076

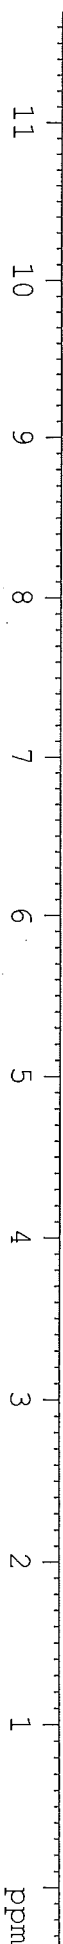

9.690  
9.672

8.459  
8.449  
8.438  
8.421  
8.389  
8.363

8.022  
8.002

7.673  
7.646  
7.615  
7.591  
7.565

7.330  
7.305  
7.282

Current Data Parameters  
NAME KS-GSA-01-166 H1  
EXPNO 7  
PROCNO 1

F2 - Acquisition Parameters

Date\_ 20110610  
Time 15.43  
INSTRUM spect  
PROBHD 5 mm QNP 1H/1  
PULPROG zg30  
TD 65536  
SOLVENT DMSO  
NS 64  
DS 2  
SWH 6172.839 Hz  
FIDRES 0.094130 Hz  
AQ 5.3084660 sec  
RG 406.4  
DM 81.000 usec  
DE 6.00 usec  
TE 300.0 K  
D1 1.00000000 sec

===== CHANNEL f1 =====

MUCL 1H  
P1 8.50 usec  
PL1 0.00 dB  
SFO1 300.1318534 MHz  
F2 - Processing Parameters  
SI 32768  
SF 300.1300000 MHz  
WDW EM  
SSB 0  
LB 0.30 Hz  
GB 0  
PC 1.00

1.000

1.037  
1.000

1.005

2.031

1.014

10.0  
9.5  
9.0  
8.5  
8.0  
7.5  
7.0  
ppm

Current Data Parameters  
NAME KS-GSA-01-166 H1  
EXPNO 7  
PROCNO 1

F2 - Acquisition Parameters

Date\_ 20110610  
Time 15.43  
INSTRUM spect  
PROBHD 5 mm QNP 1H/1  
PULPROG zg30  
TD 65536  
SOLVENT DMSO  
NS 64  
DS 2  
SWH 6172.839 Hz  
FIDRES 0.094190 Hz  
AQ 5.3084660 sec  
RG 406.4  
DM 81.000 usec  
DE 6.00 usec  
TE 300.0 K  
D1 1.00000000 sec

===== CHANNEL f1 =====

NUC1 1H  
P1 8.50 usec  
PL1 0.00 dB  
SFO1 300.1318534 MHz  
F2 - Processing parameters  
SI 32768  
SF 300.1300000 MHz  
WDW EM  
SSB 0  
GB 0  
PC 1.00

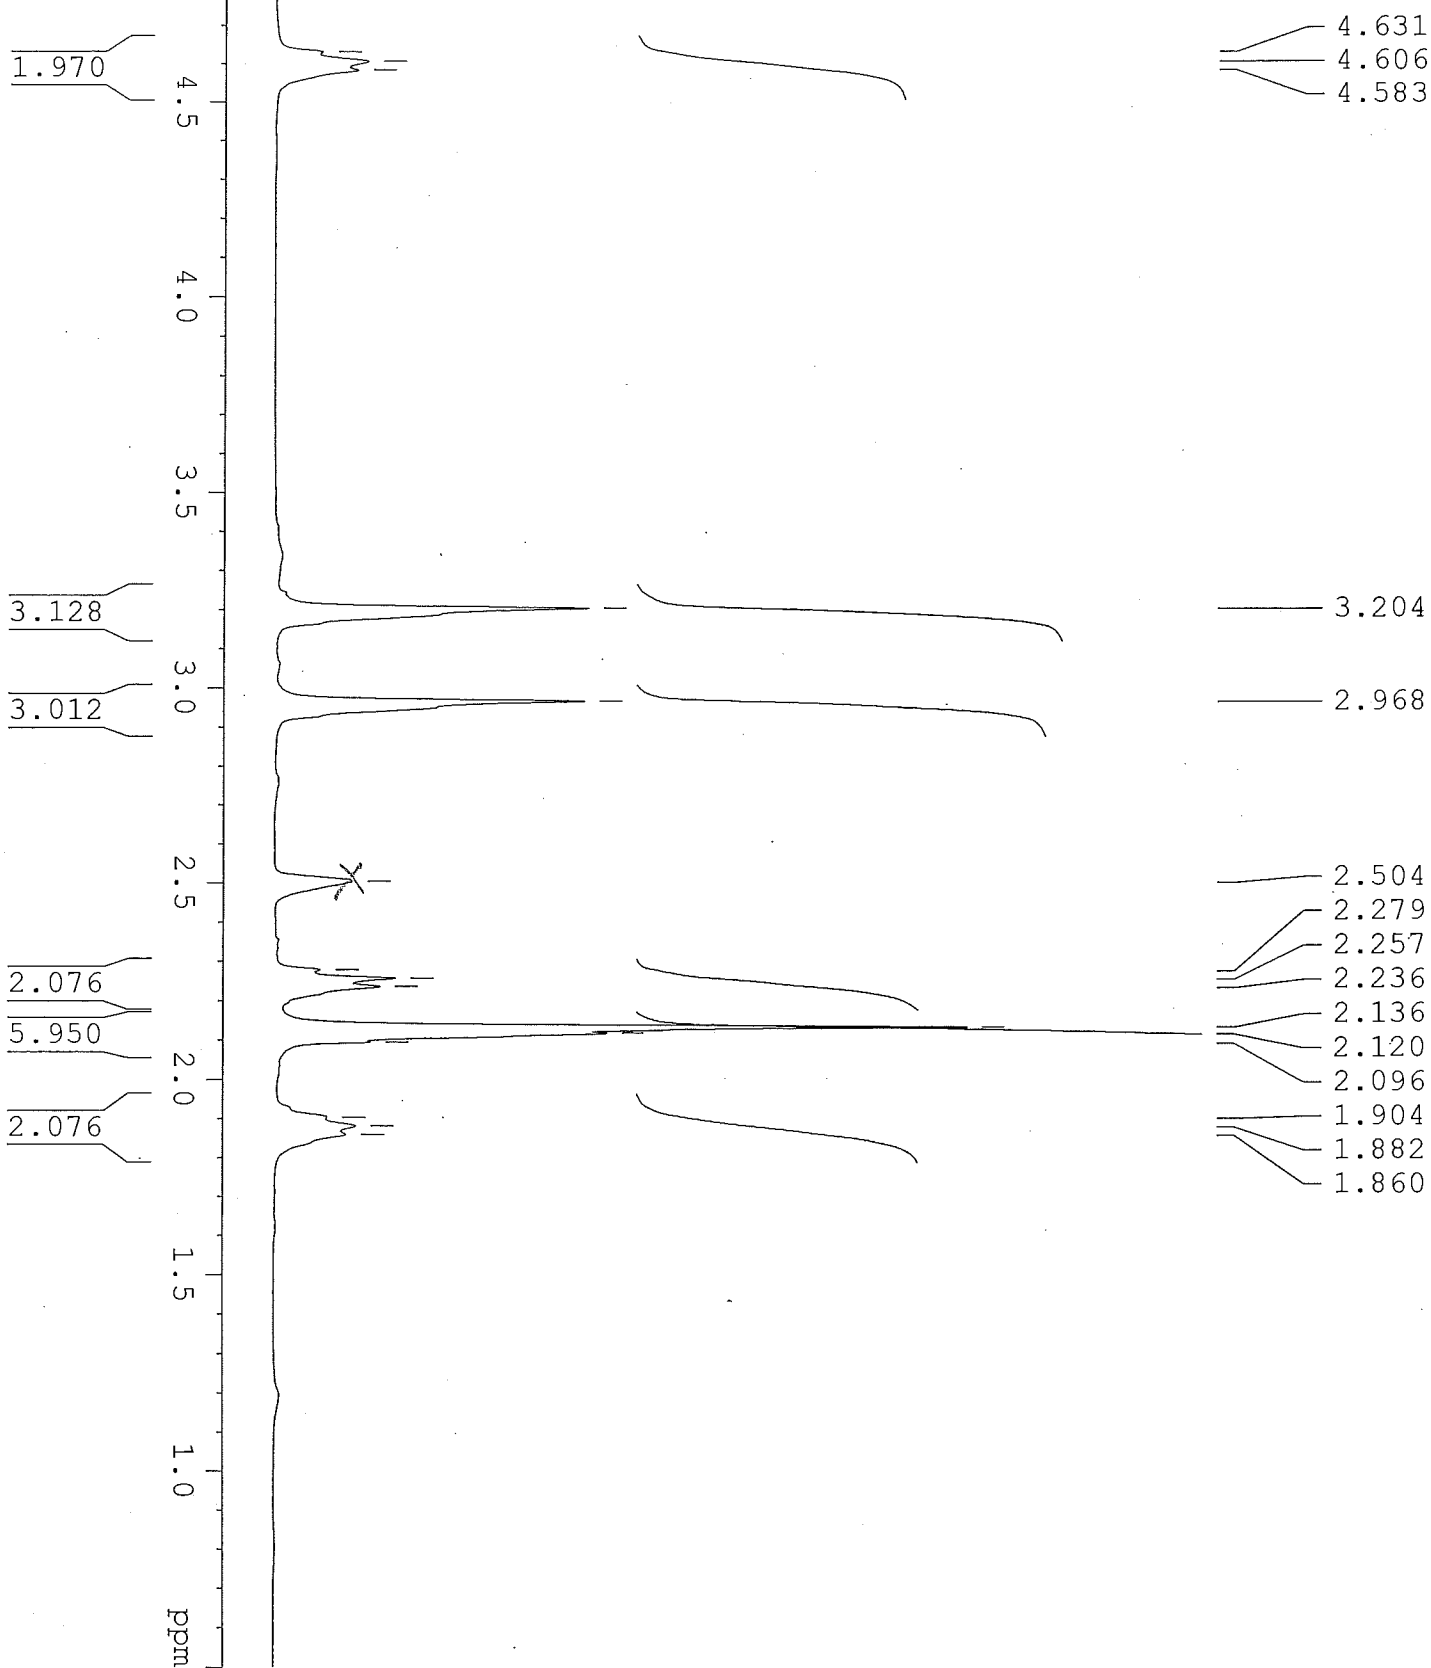

16513C

Current Data Parameters  
NAME KS-GSA-01-14-13C  
EXPNO 7  
PROCNO 1

F2 - Acquisition Parameters  
Date\_ 20110611  
Time 10.57

INSTRUM spect  
PROBHD 5 mm QNP 1H/1  
PULPROG zgpg30

TD 65536  
SOLVENT CDCl3  
NS 18000

DS 4  
SWH 17985.611 Hz  
FIDRES 0.274439 Hz

AQ 1.8219508 sec  
RG 2580.3  
DW 27.800 usec

DE 6.00 usec  
TE 300.0 K  
D1 2.00000000 sec

d11 0.03000000 sec  
d12 0.00002000 sec

===== CHANNEL f1 =====  
NUC1 13C  
P1 6.00 usec  
PL1 2.00 dB  
SFO1 75.4752653 MHz

===== CHANNEL f2 =====  
CDEPRG2 waltz16  
NUC2 1H  
PCPD2 80.00 usec  
PL2 0.00 dB

PL12 19.47 dB  
PL13 19.00 dB  
SFO2 300.1312005 MHz

F2 - Processing parameters  
SI 32768  
SF 75.4677190 MHz  
WDW Ex  
SSB 0  
LB 1.00 Hz  
GB 0  
FC 1.00

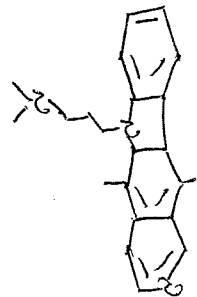

- 150.422
- 144.997
- 141.782
- 140.950
- 134.516
- 129.265
- 128.092
- 125.036
- 124.706
- 123.637
- 123.000
- 120.576
- 116.785
- 110.129
- 109.462

- 56.878
- 46.058
- 44.042
- 41.216
- 40.938
- 40.660
- 40.382
- 40.104
- 39.826
- 39.548
- 39.182
- 28.442
- 15.312
- 13.929

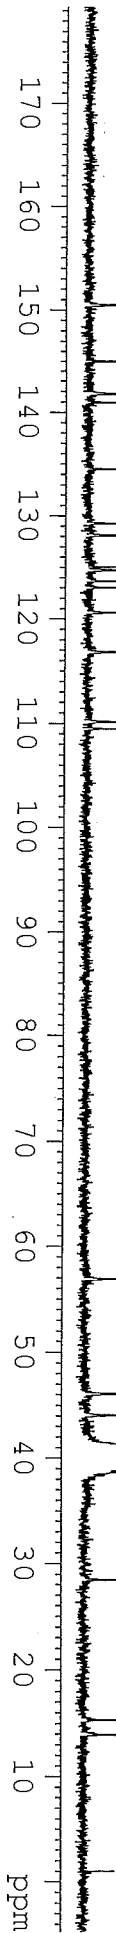

Current Data Parameters  
NAME KS-GSA-01-166.13C  
EXPNO 7  
PROCNO 1

F2 - Acquisition Parameters

Date\_ 20110611  
Time 10:57  
INSTRUM spect  
PROBHD 5 mm QNP 1H/1  
PULPROG zgpg30  
TD 65536  
SOLVENT CDCl3  
NS 18000  
DS 4  
SWH 17985.611 Hz  
FIDRES 0.274439 Hz  
AQ 1.8219508 sec  
RG 2580.3  
DM 27.800 usec  
DE 6.00 usec  
TE 300.0 K  
D1 2.00000000 sec  
d11 0.03000000 sec  
d12 0.0002000 sec

===== CHANNEL f1 =====  
NUC1 13C  
P1 6.00 usec  
PL1 2.00 dB  
SFO1 75.4752653 MHz

===== CHANNEL f2 =====  
CPDPRG2 waltz16  
NUC2 1H  
PCPD2 80.00 usec  
PL2 0.00 dB  
PL12 18.47 dB  
PL13 18.00 dB  
SFO2 300.1312005 MHz

F2 - Processing Parameters  
SI 32768  
SF 75.4677190 MHz  
WDW EM  
SSB 0  
LB 1.00 Hz  
GB 0  
PC 1.00

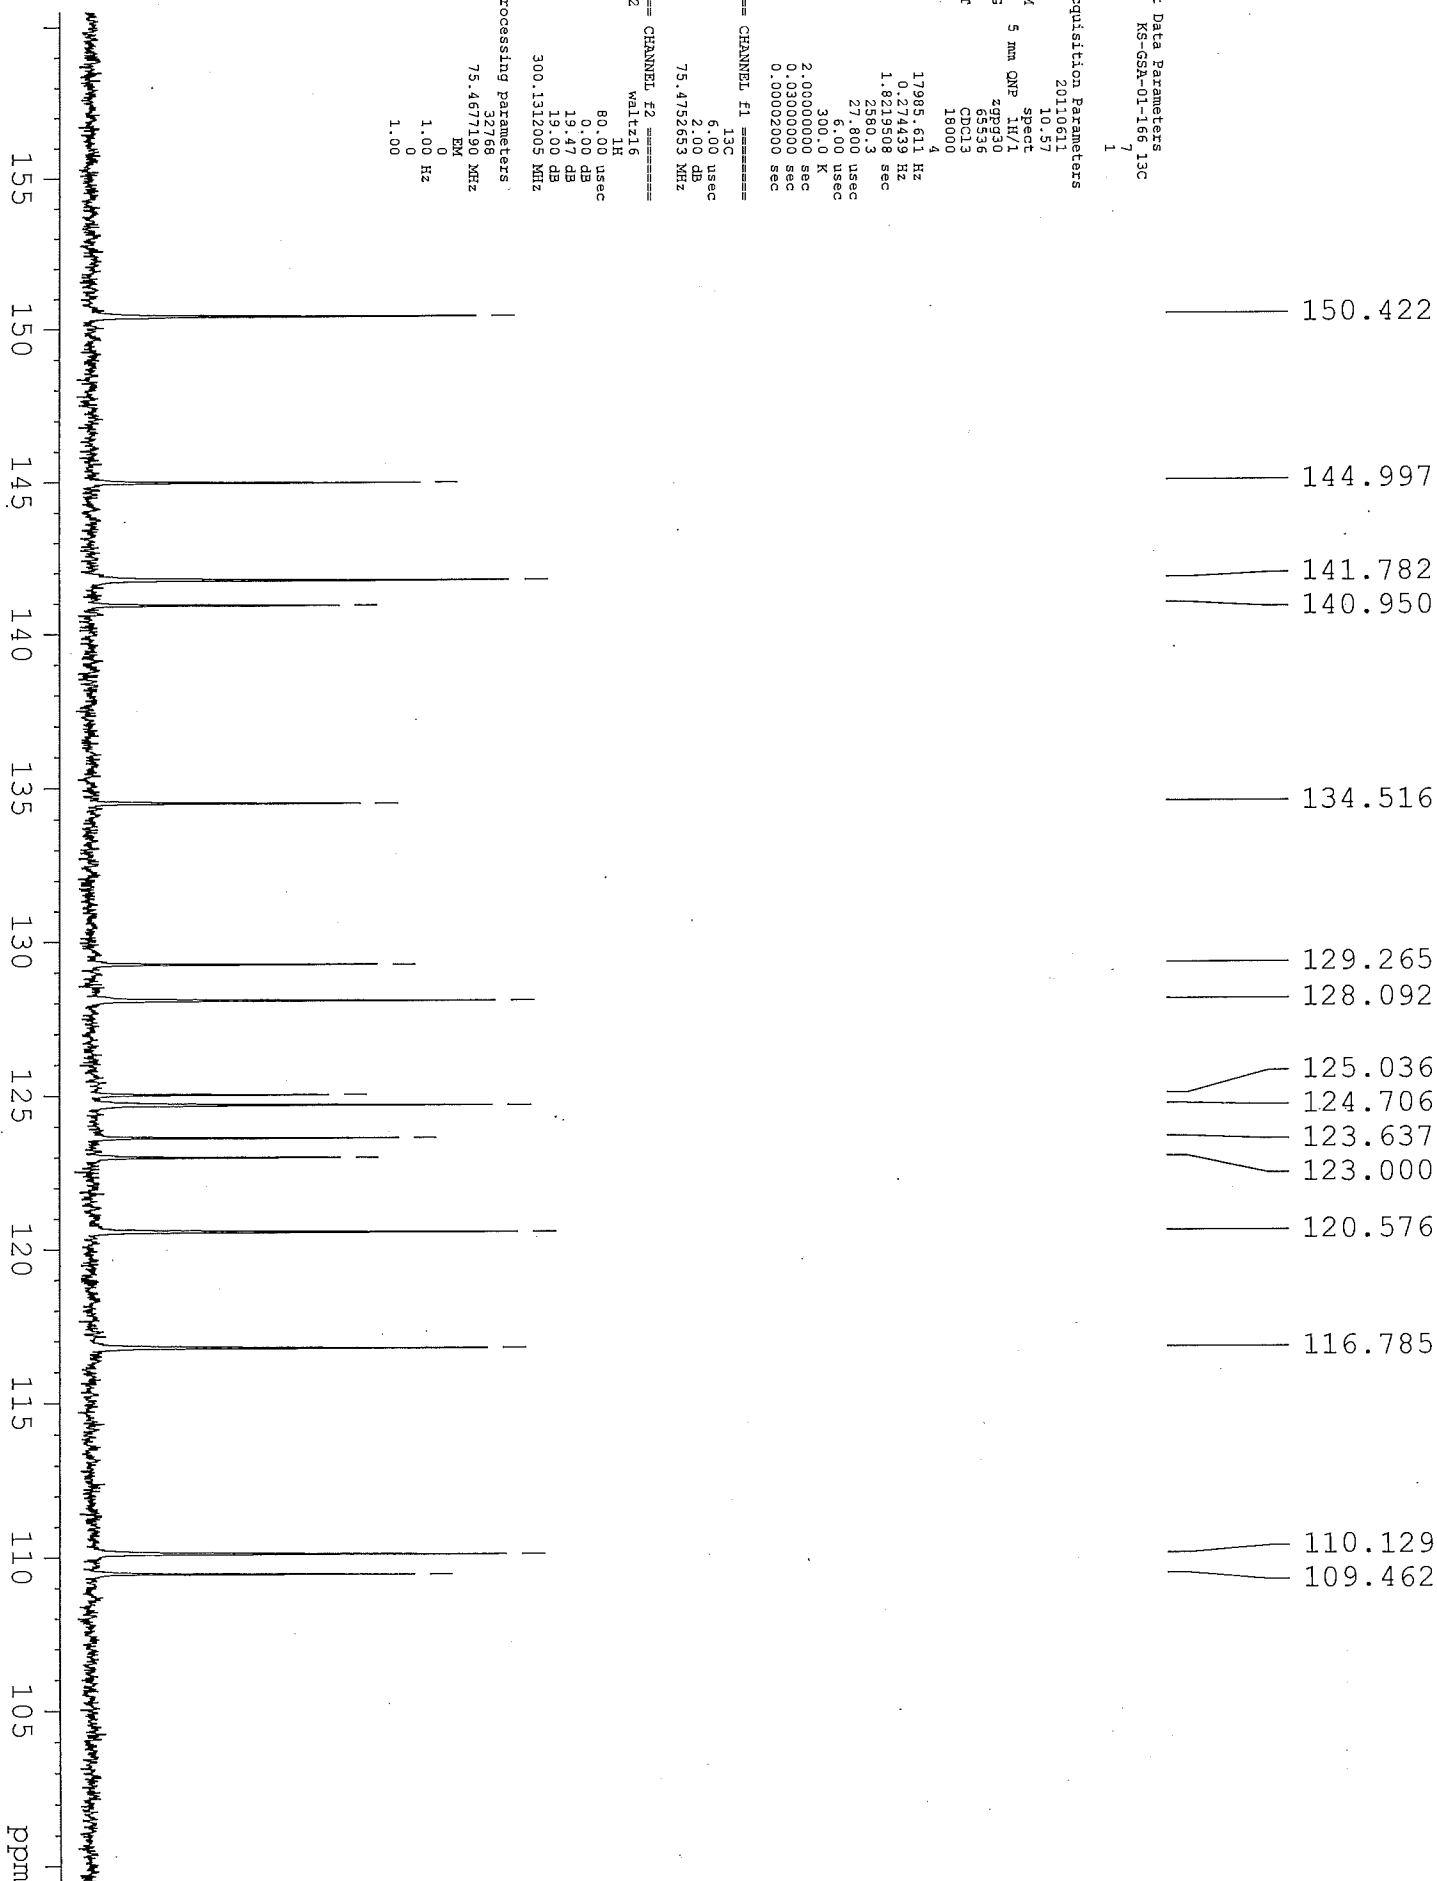

Current Data Parameters  
NAME KS-GSA-01-166 13C  
EXPNO 7  
PROCNO 1

F2 - Acquisition Parameters

Date\_ 20110611  
Time 10.37  
INSTRUM spect  
PROBHD 5 mm QNP 1H/1  
PULPROG zgpg30  
TD 65536  
SOLVENT CDCl3  
NS 18000  
DS 4  
SWH 17965.611 Hz  
FIDRES 0.274439 Hz  
AQ 1.6218508 sec  
RG 2560.3  
DM 27.800 usec  
DE 300.0 K  
TE 6.00 usec  
D1 2.00000000 sec  
d11 0.03000000 sec  
d12 0.00002000 sec

===== CHANNEL f1 =====  
NUC1 13C  
P1 6.00 usec  
PL1 2.50 dB  
SFO1 75.4752653 MHz

===== CHANNEL f2 =====  
CPRRG2 waltz16  
NUC2 1H  
PCPD2 80.00 usec  
PL2 0.00 dB  
PL12 19.47 dB  
PL13 19.00 dB  
SFO2 300.1312005 MHz

F2 - Processing Parameters

SI 32768  
SF 75.4677190 MHz  
WDW EM  
SSB 0  
LB 1.00 Hz  
GB 0  
PC 1.00

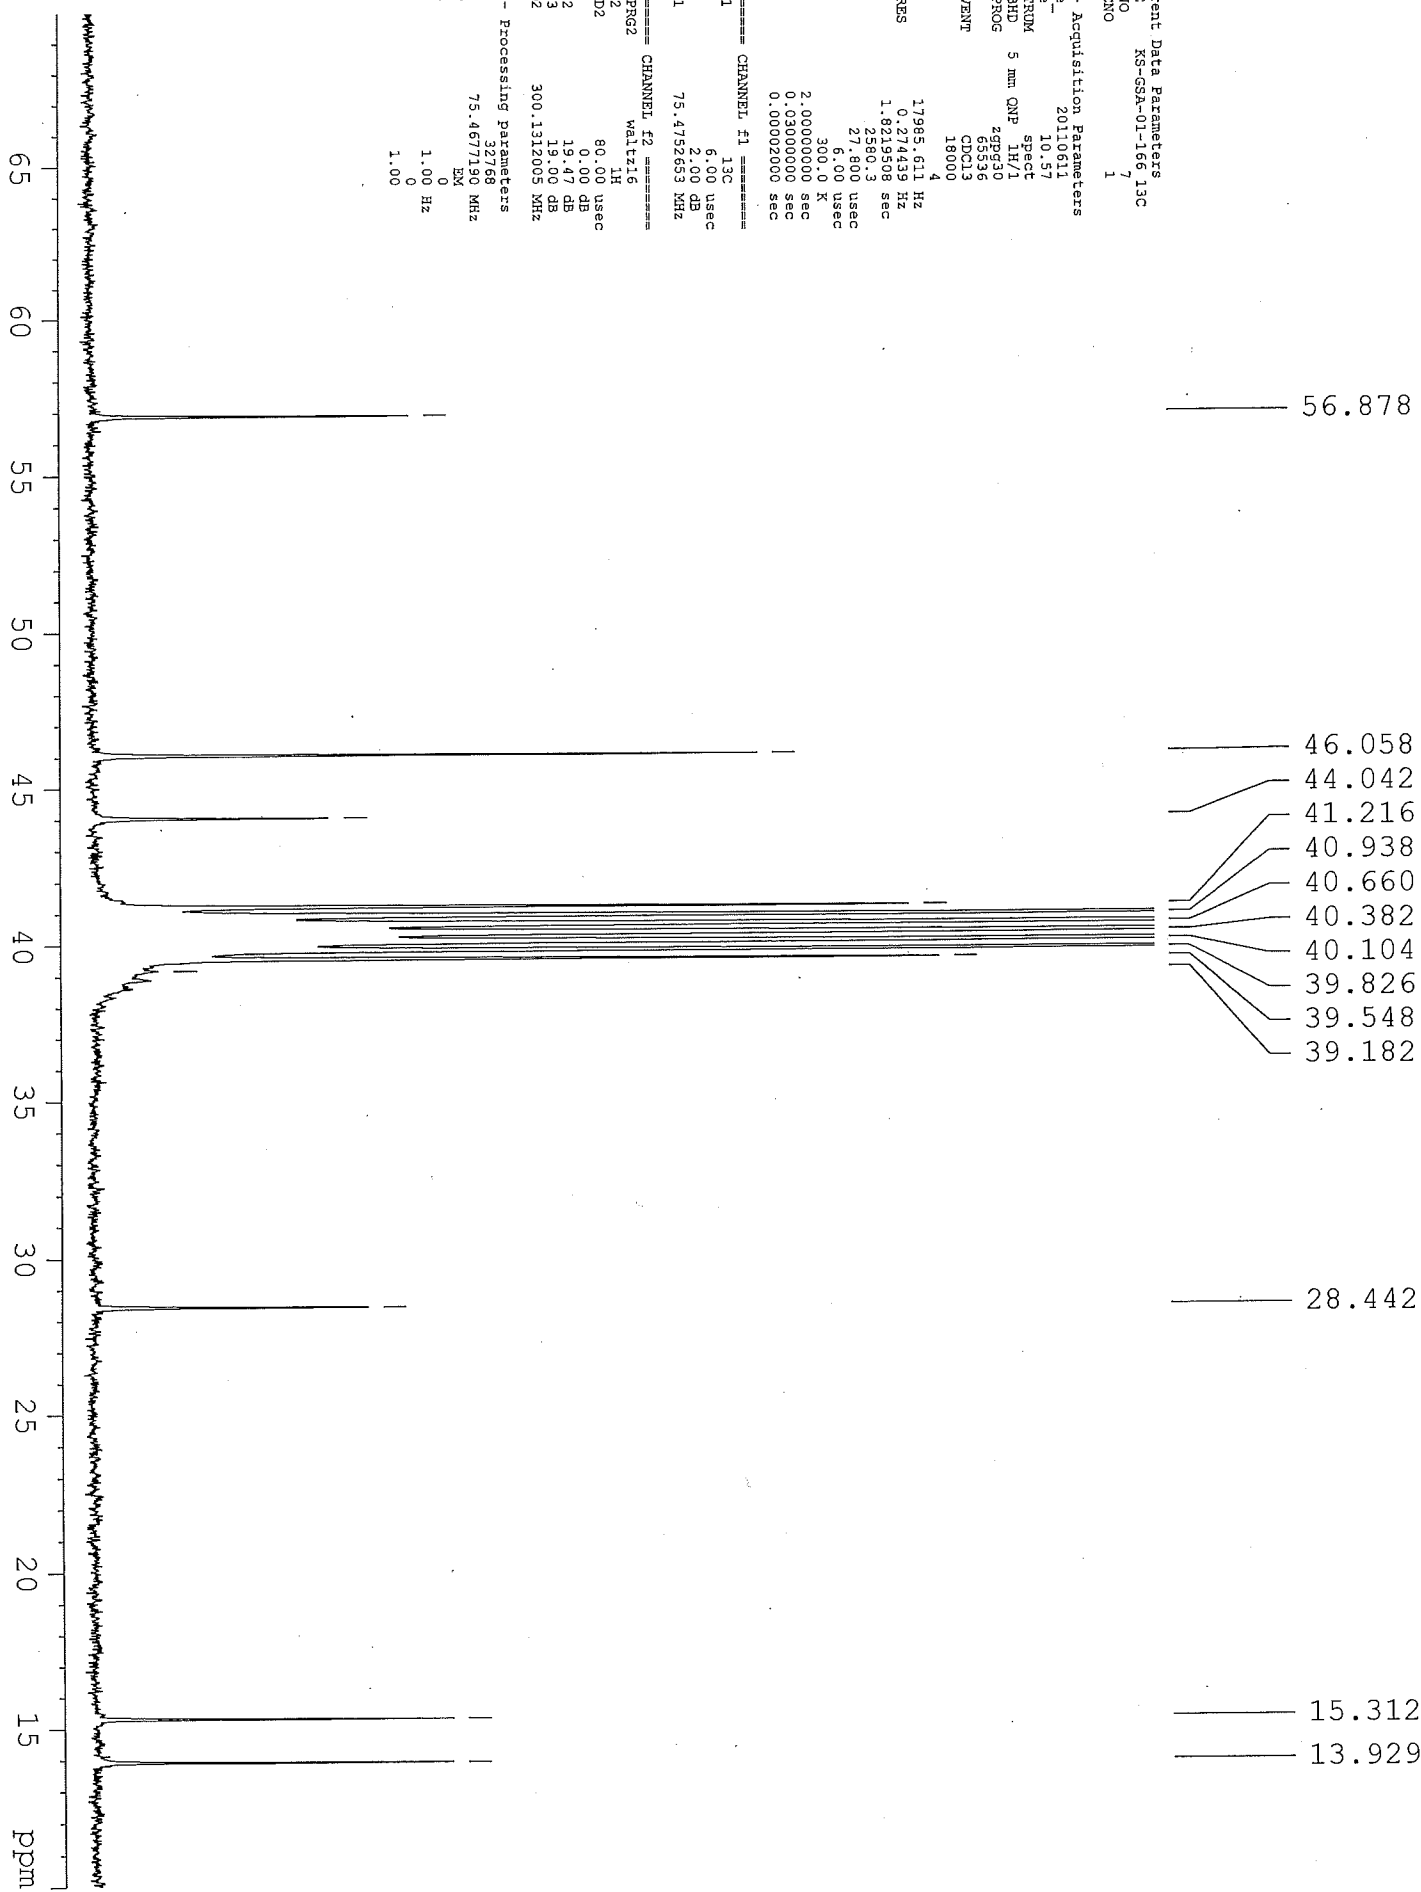

MSD1 TIC, MS File (HURLEY11\JUN13\_16.D) API-ES, Pos, Scan, Frag: 70, "positive scan"

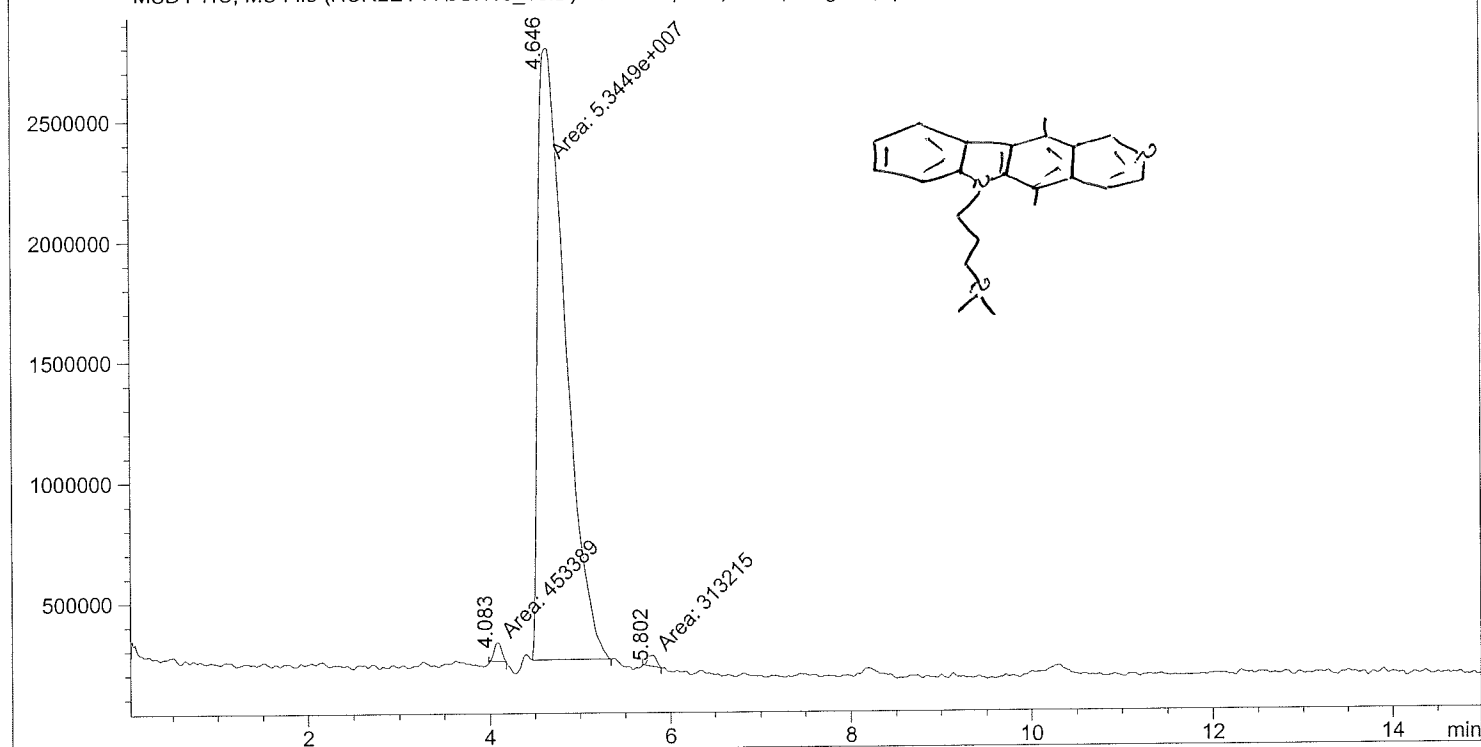

```
Sorted By      :      Signal
Multiplier    :      1.0000
Dilution      :      1.0000
Use Multiplier & Dilution Factor with ISTDs
```

Signal 1: MSD1 TIC, MS File

| Peak # | RetTime [min] | Type | Width [min] | Area      | Height    | Area %  |
|--------|---------------|------|-------------|-----------|-----------|---------|
| 1      | 4.083         | MM   | 0.0952      | 4.53389e5 | 7.93571e4 | 0.8363  |
| 2      | 4.646         | MM   | 0.3510      | 5.34490e7 | 2.53773e6 | 98.5860 |
| 3      | 5.802         | MM   | 0.1118      | 3.13215e5 | 4.67125e4 | 0.5777  |

|          |           |           |
|----------|-----------|-----------|
| Totals : | 5.42156e7 | 2.66380e6 |
|----------|-----------|-----------|

\*\*\* End of Report \*\*\*



=====

|                 |                                  |            |          |
|-----------------|----------------------------------|------------|----------|
| Injection Date  | : 6/13/2011 6:17:29 PM           | Location   | : Vial 4 |
| Sample Name     | : KS-GSA-01-165                  | Inj        | : 1      |
| Acq. Operator   | : Karen                          | Inj Volume | : 0.1 µl |
| Acq. Instrument | : Instrument 1                   |            |          |
| Method          | : C:\HPCHEM\1\METHODS\LC_MS_UV.M |            |          |
| Last changed    | : 6/13/2011 6:15:43 PM by Karen  |            |          |

Zorbax SB C18, 150 x 4.6, 3.5µ, 40/60/0.25, MeOH/water/formic, POS, 150-600; frag 70; 25C, cap volt 2500, gas temp 350; drying gas 10

Current Chromatogram(s)

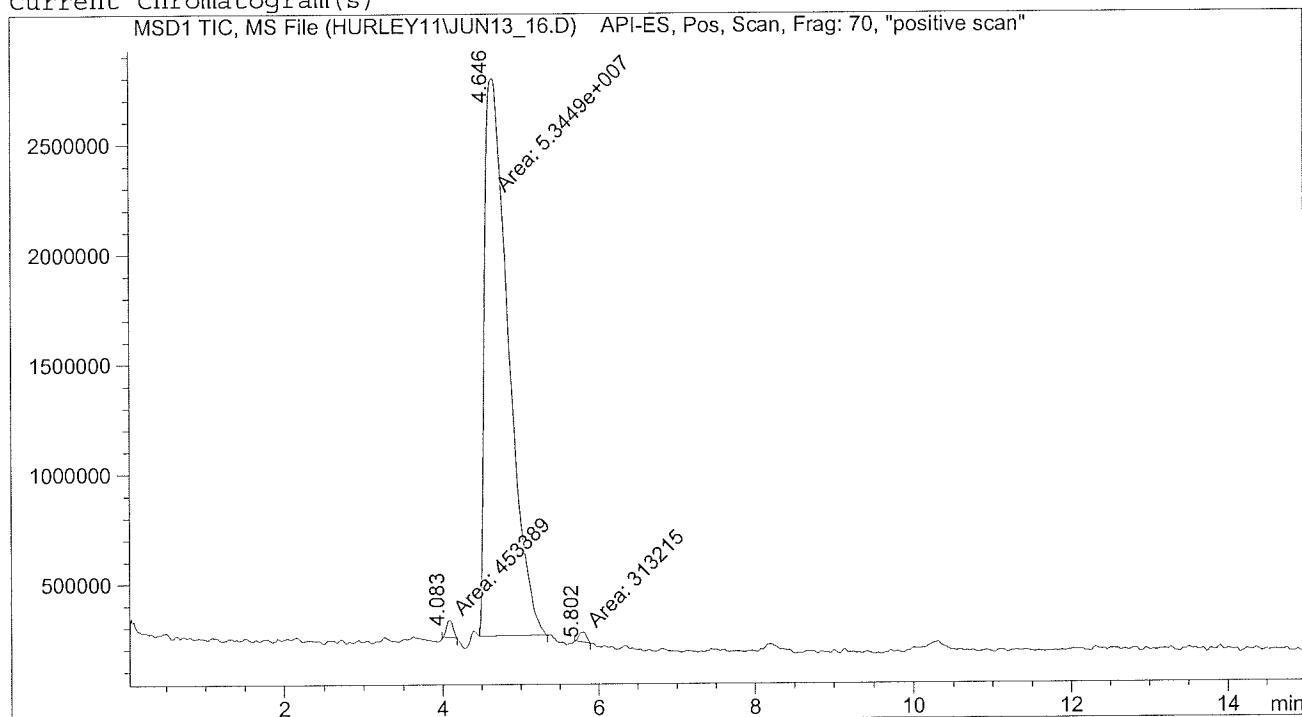

Apex Mass Spectrum of Peak 4.646 of JUN13\_16.D

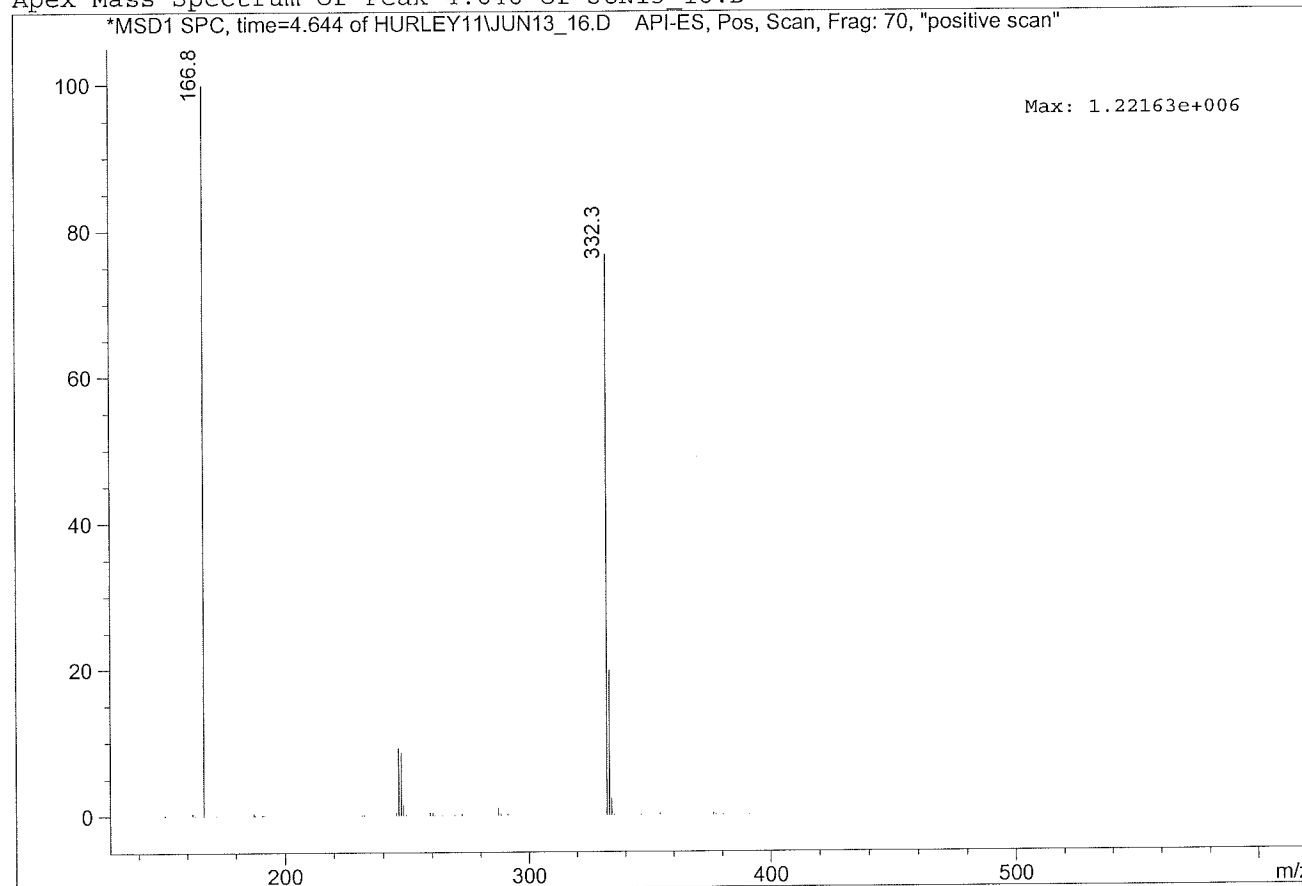

```
=====
Injection Date   : 6/13/2011 6:17:29 PM
Sample Name      : KS-GSA-01-165
Acq. Operator    : Karen
Acq. Instrument  : Instrument 1
Method           : C:\HPCHEM\1\METHODS\LC_MS_UV.M
Last changed     : 6/13/2011 6:15:43 PM by Karen
Zorbax SB C18,150 x 4.6, 3.5u,40/60/0.25,MeOH/water/formic, POS, 150-600; frag 70; 25C, cap volt
2500, gas temp 350; drying gas 10
=====
```

Current Chromatogram(s)

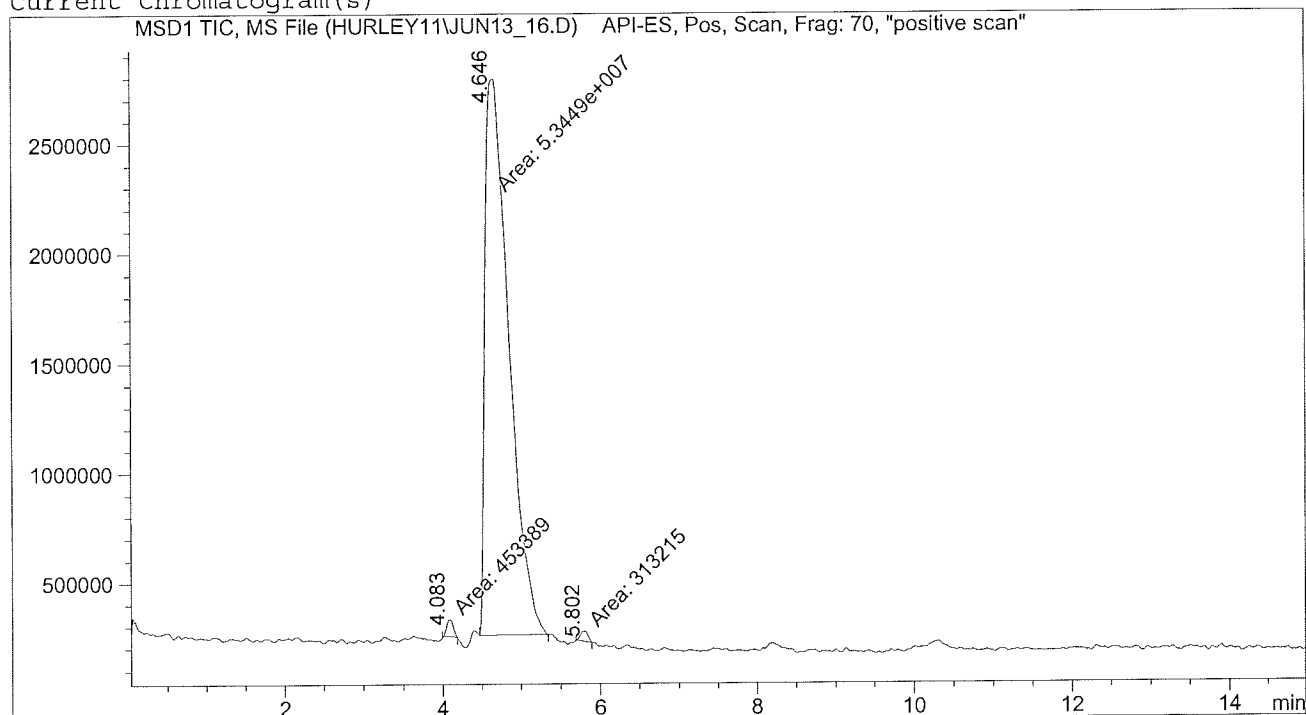

Apex Mass Spectrum of Peak 4.083 of JUN13\_16.D

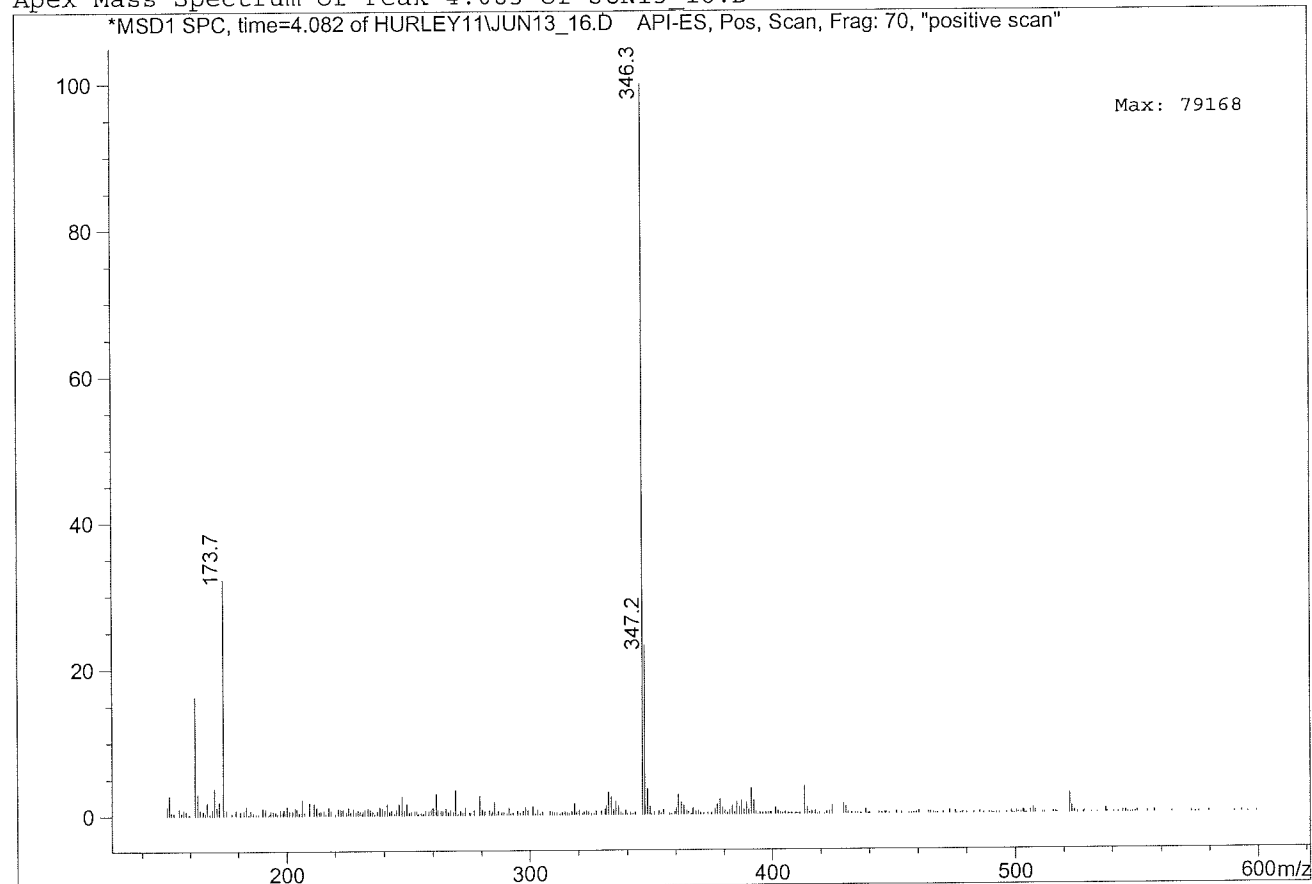

=====

|                 |                                  |            |          |
|-----------------|----------------------------------|------------|----------|
| Injection Date  | : 6/13/2011 6:17:29 PM           | Location   | : Vial 4 |
| Sample Name     | : KS-GSA-01-165                  | Inj        | : 1      |
| Acq. Operator   | : Karen                          | Inj Volume | : 0.1 µl |
| Acq. Instrument | : Instrument 1                   |            |          |
| Method          | : C:\HPCHEM\1\METHODS\LC_MS_UV.M |            |          |
| Last changed    | : 6/13/2011 6:15:43 PM by Karen  |            |          |

Zorbax SB C18, 150 x 4.6, 3.5µ, 40/60/0.25, MeOH/water/formic, POS, 150-600; frag 70; 25C, cap volt 2500, gas temp 350; drying gas 10

Current Chromatogram(s)

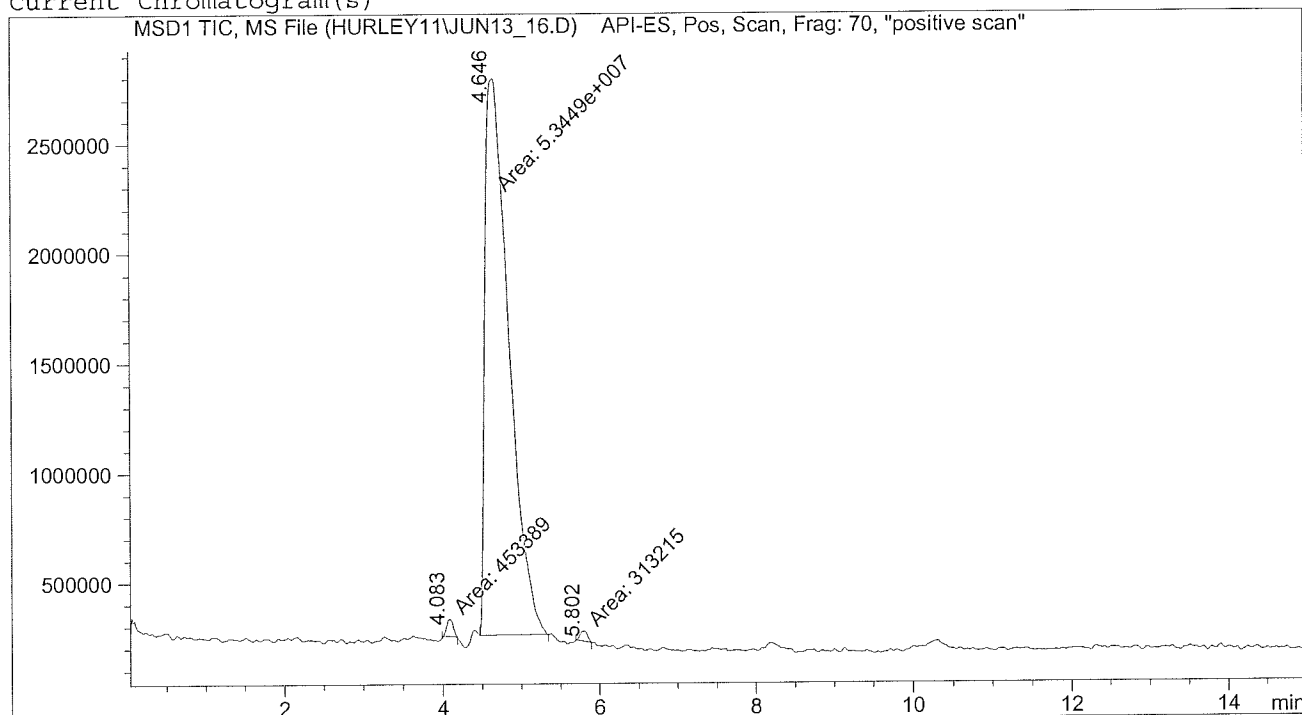

Apex Mass Spectrum of Peak 5.802 of JUN13\_16.D

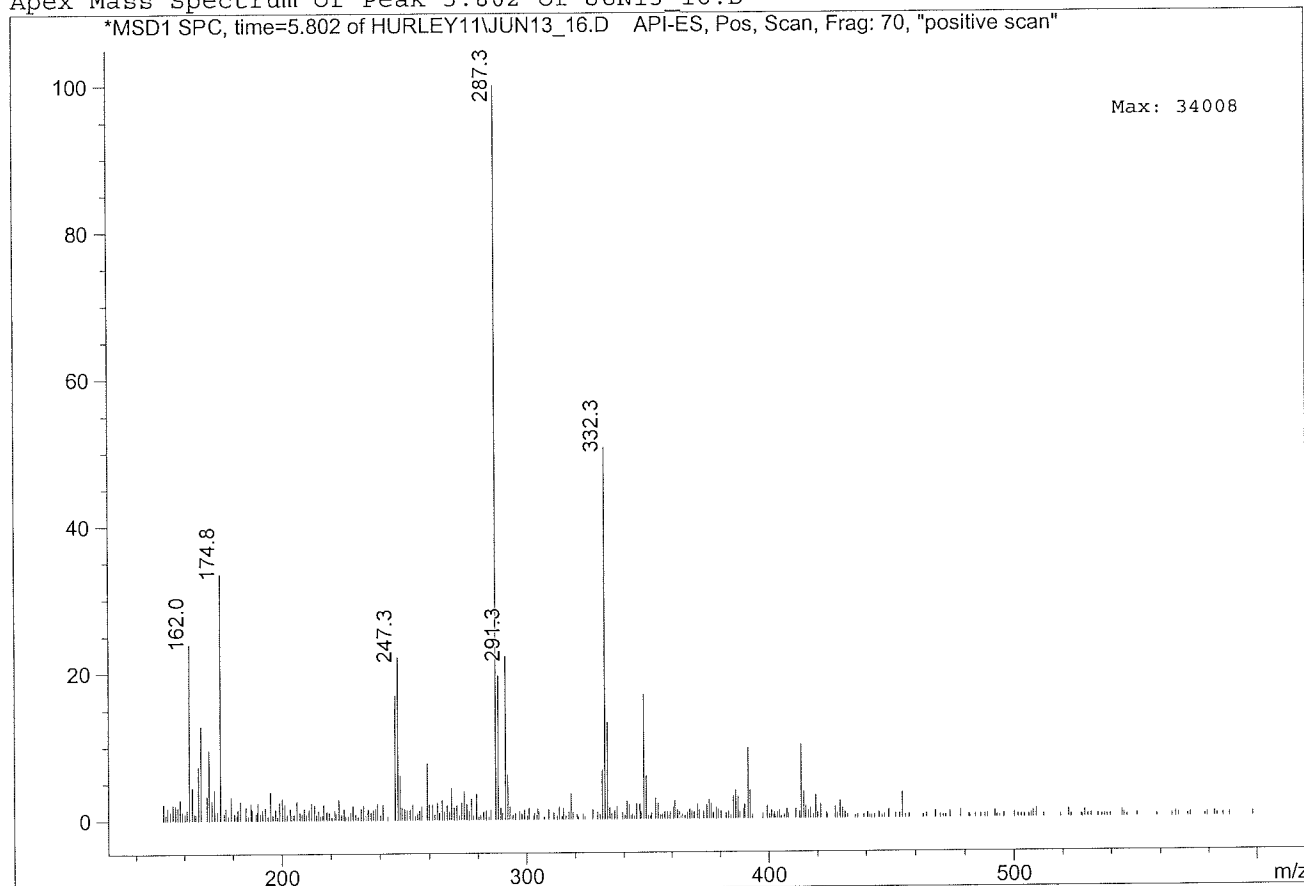

E:\MSLab\LCQ\KS\_GSA\_01\_165  
Srinivasa Kota, ACN:MeOH

06/14/2011 04:24:01 PM

KS\_GSA\_01\_165

KS\_GSA\_01\_165 #22-25 RT: 0.58-0.66 AV: 4 NL: 2.47E7  
T: + p Full ms [105.00-1500.00]

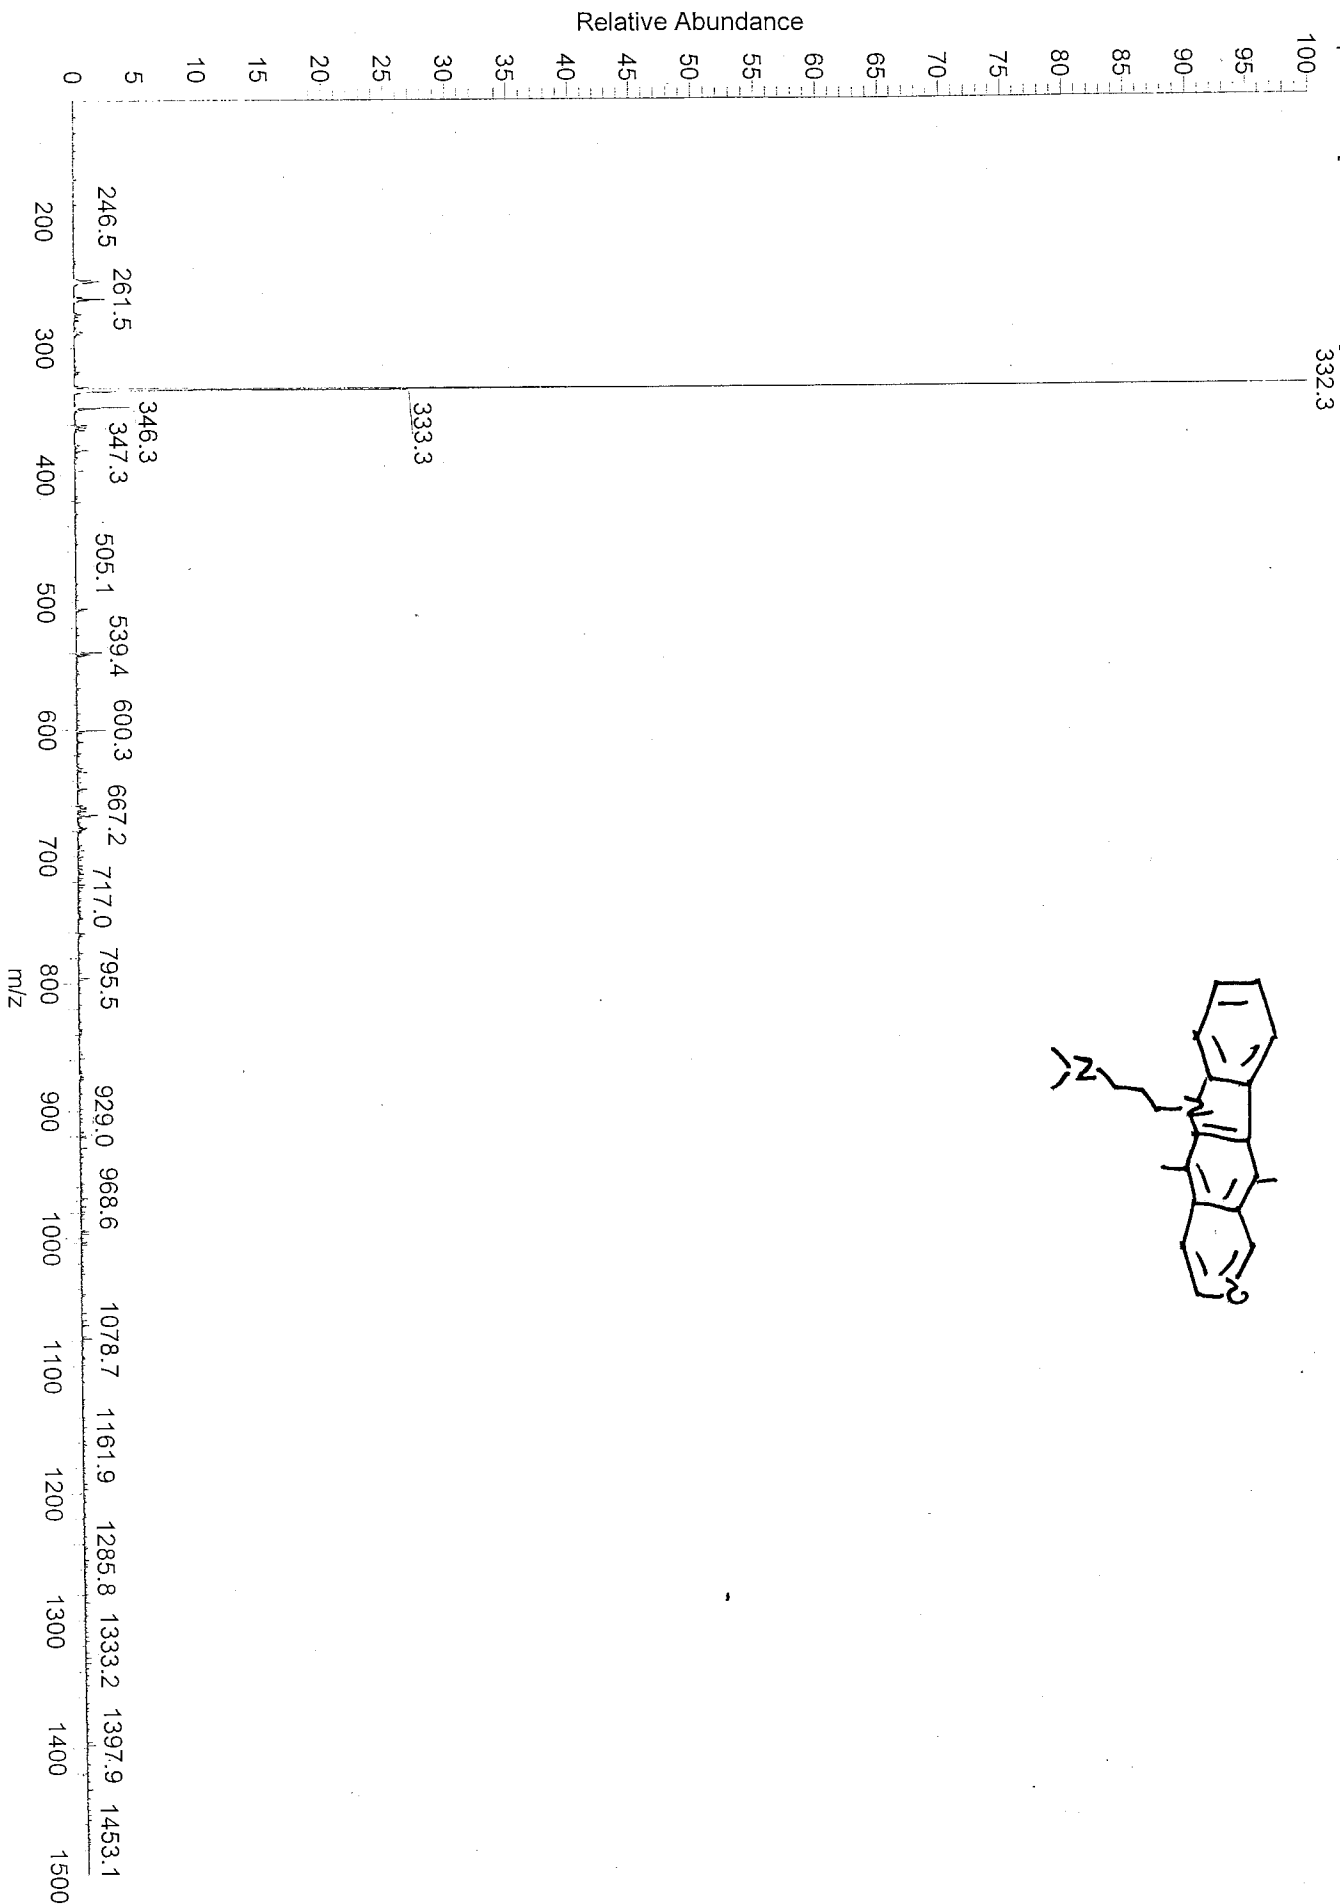

E:\MSLab\LCQ\KS\_GSA\_01\_165  
Srinivasa Kota, ACN:MeOH

06/14/2011 04:24:01 PM

KS\_GSA\_01\_165

KS\_GSA\_01\_165 #11-16 RT: 0.28-0.42 AV: 6 NL: 3.50E6  
T: + p Full ms2 332.00@35.00 [105.00-1500.00]

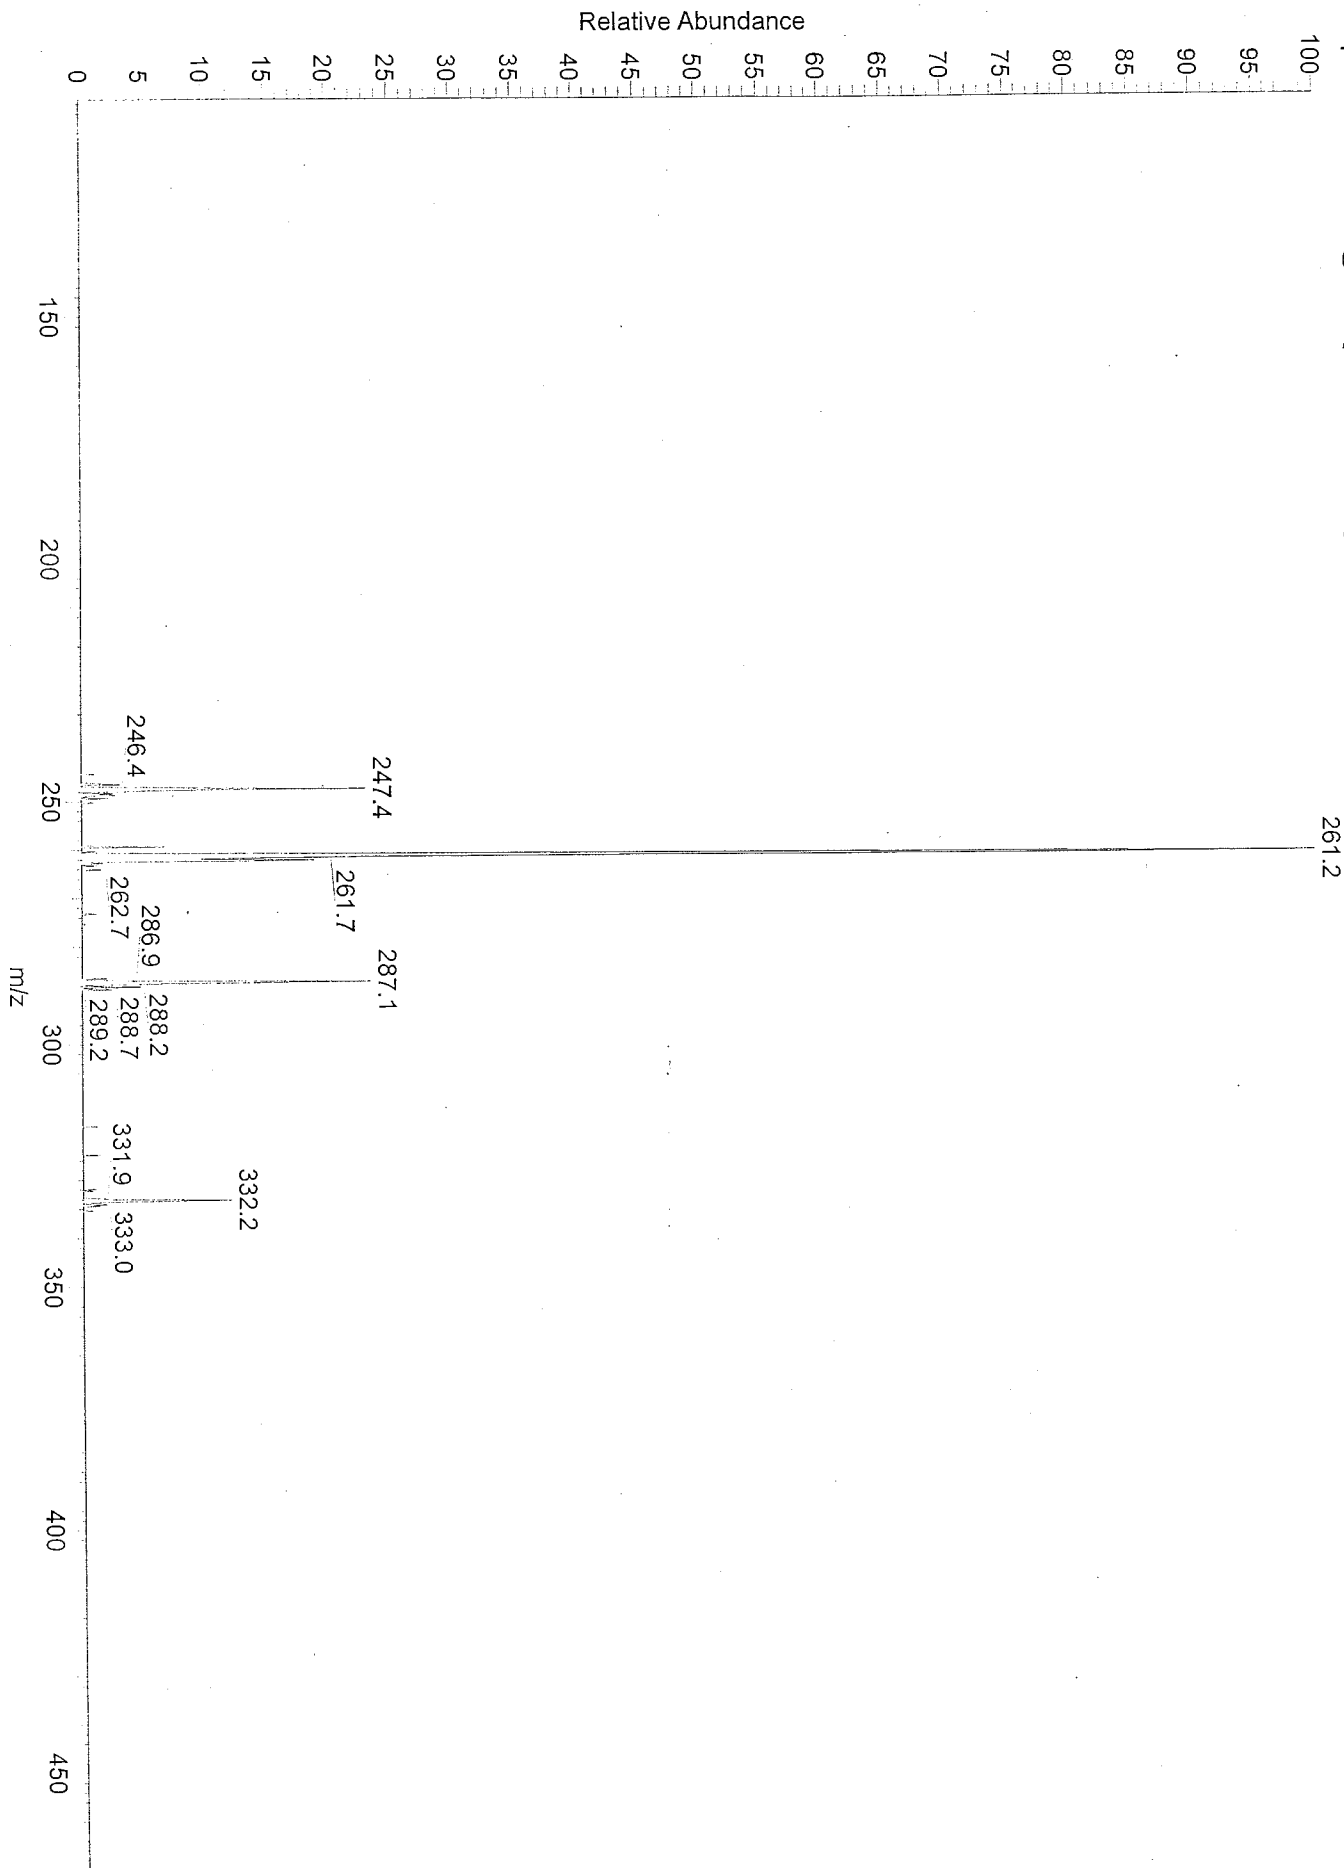

# SmartFormula Manually

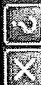

Min

C<sub>13</sub>

Generate

Max

C<sub>13</sub>-n

Help

Note: for m < 2000 the elements C, H, N, and O are considered implicitly.

Measured m/z 332.21233

Tolerance 10

mDa

Charge 1

| Meas. m/z | # | Formula                                                       | Score  | m/z       | err [mDa] | err [ppm] | mSigma | rdB  | e <sup>-</sup> Conf | N-Rule |
|-----------|---|---------------------------------------------------------------|--------|-----------|-----------|-----------|--------|------|---------------------|--------|
| 332.21233 | 1 | C <sub>17</sub> H <sub>26</sub> N <sub>5</sub> O <sub>2</sub> | 4.75   | 332.20810 | -4.2      | -12.7     | 7.7    | 7.5  | even                | ok     |
|           | 2 | C <sub>16</sub> H <sub>26</sub> N <sub>7</sub> O              | 0.06   | 332.21933 | 7.0       | 21.1      | 10.1   | 7.5  | even                | ok     |
|           | 3 | C <sub>22</sub> H <sub>26</sub> N <sub>4</sub>                | 100.00 | 332.21212 | -0.2      | -0.6      | 19.6   | 11.5 | even                | ok     |
|           | 4 | C <sub>13</sub> H <sub>22</sub> N <sub>11</sub>               | 0.06   | 332.20542 | -6.9      | -20.8     | 20.5   | 8.5  | even                | ok     |
|           | 5 | C <sub>16</sub> H <sub>30</sub> N <sub>6</sub> O              | 0.55   | 332.20676 | -5.6      | -16.8     | 22.5   | 2.5  | even                | ok     |
|           | 6 | C <sub>15</sub> H <sub>30</sub> N <sub>3</sub> O <sub>5</sub> | 0.45   | 332.21800 | 5.7       | 17.1      | 24.4   | 2.5  | even                | ok     |

☐ Automatically locate monoisotopic peak

Maximum number of formulas

500

☒ Check rings plus double bonds

Minimum

-0.5

Maximum

40

Electron configuration

even

☒ Filter H/C element ratio

Minimum H/C

0

Maximum H/C

3

☒ Estimate carbon number

☒ Generate immediately

Show Pattern

# Generic Display Report

## Analysis Info

Analysis Name D:\DATA\Facility\_June\_11\KS\_GSA\_01\_165\_000001.d  
Method Scott\_tune  
Sample Name KS\_GSA\_01\_165  
Comment Srinivasa Kota, ACN:MeOH

Acquisition Date 6/14/2011 4:26:03 PM

Operator  
Instrument apex-Ultra

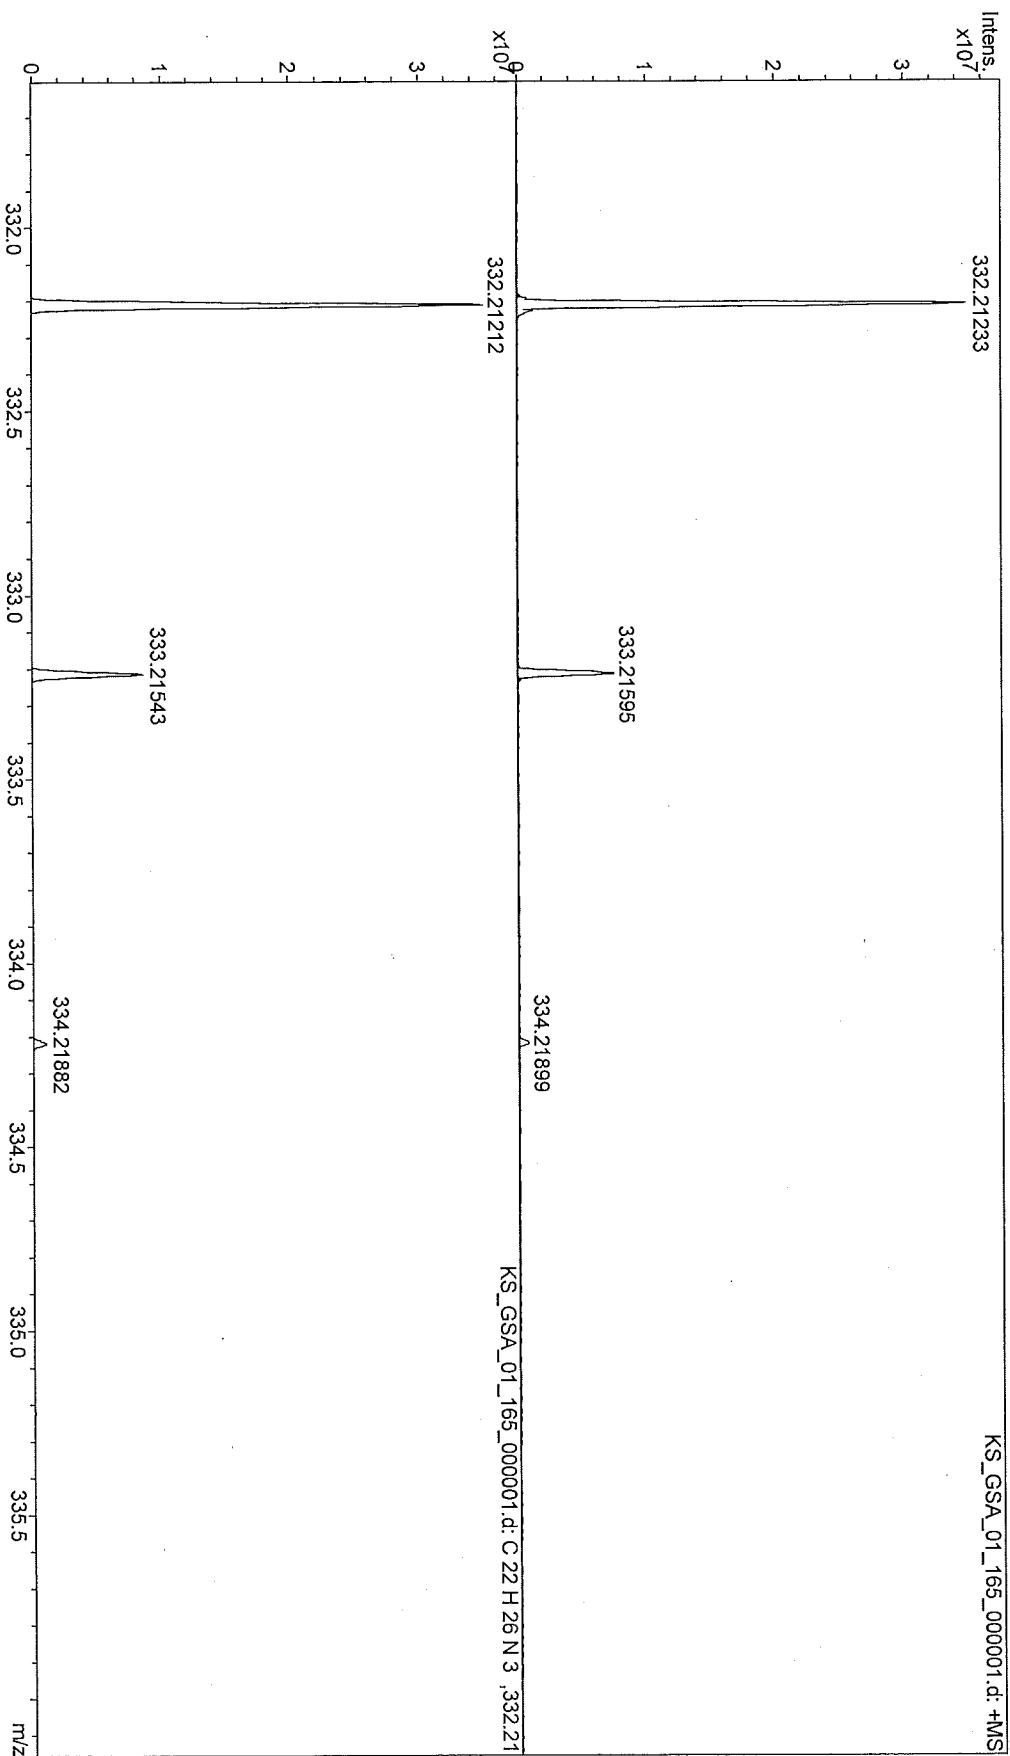

Current Data Parameters  
 NAME VB-GSA-0336-2  
 EXPNO 341  
 PROCNO 1

F2 - Acquisition Parameters:  
 Date\_ 20110524  
 Time 15.45

INSTRUM spect  
 PROBHD 5 mm QNP 1H/1  
 PULPROG zg30  
 TD 65536  
 SOLVENT DMSO

NS 2  
 DS 2  
 SWH 6172.839 Hz  
 FIDRES 0.094190 Hz  
 AQ 5.3084660 sec  
 RG 724.1  
 DW 81.000 use  
 DE 6.00 use  
 TE 300.0 K  
 D1 1.00000000 sec

===== CHANNEL f1 =====  
 NUC1 1H  
 P1 8.50 use  
 PL1 0.00 dB  
 SFO1 300.1318534 MHz

F2 - Processing Parameters  
 SI 32768  
 SF 300.1300000 MHz  
 WDW EM  
 SSB 0  
 LB 0.30 Hz  
 GB 0  
 PC 1.00

- 9.682
- 8.415
- 8.395
- 7.908
- 7.888
- 7.872
- 7.865
- 7.487
- 7.458
- 7.204
- 7.197
- 7.175
- 7.168
- 4.157
- 4.136
- 4.115
- 3.504
- 3.330
- 3.255
- 2.768
- 2.504
- 2.452
- 2.429
- 2.405
- 2.273
- 2.180
- 1.960
- 1.938
- 1.916
- 1.893
- 1.871
- 1.225
- 0.001

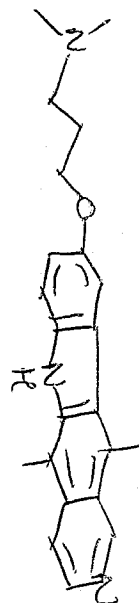

VB-GSA-0336

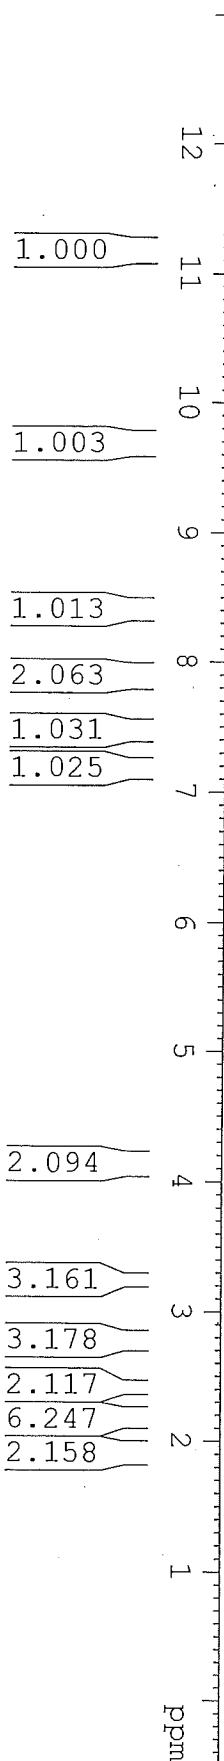



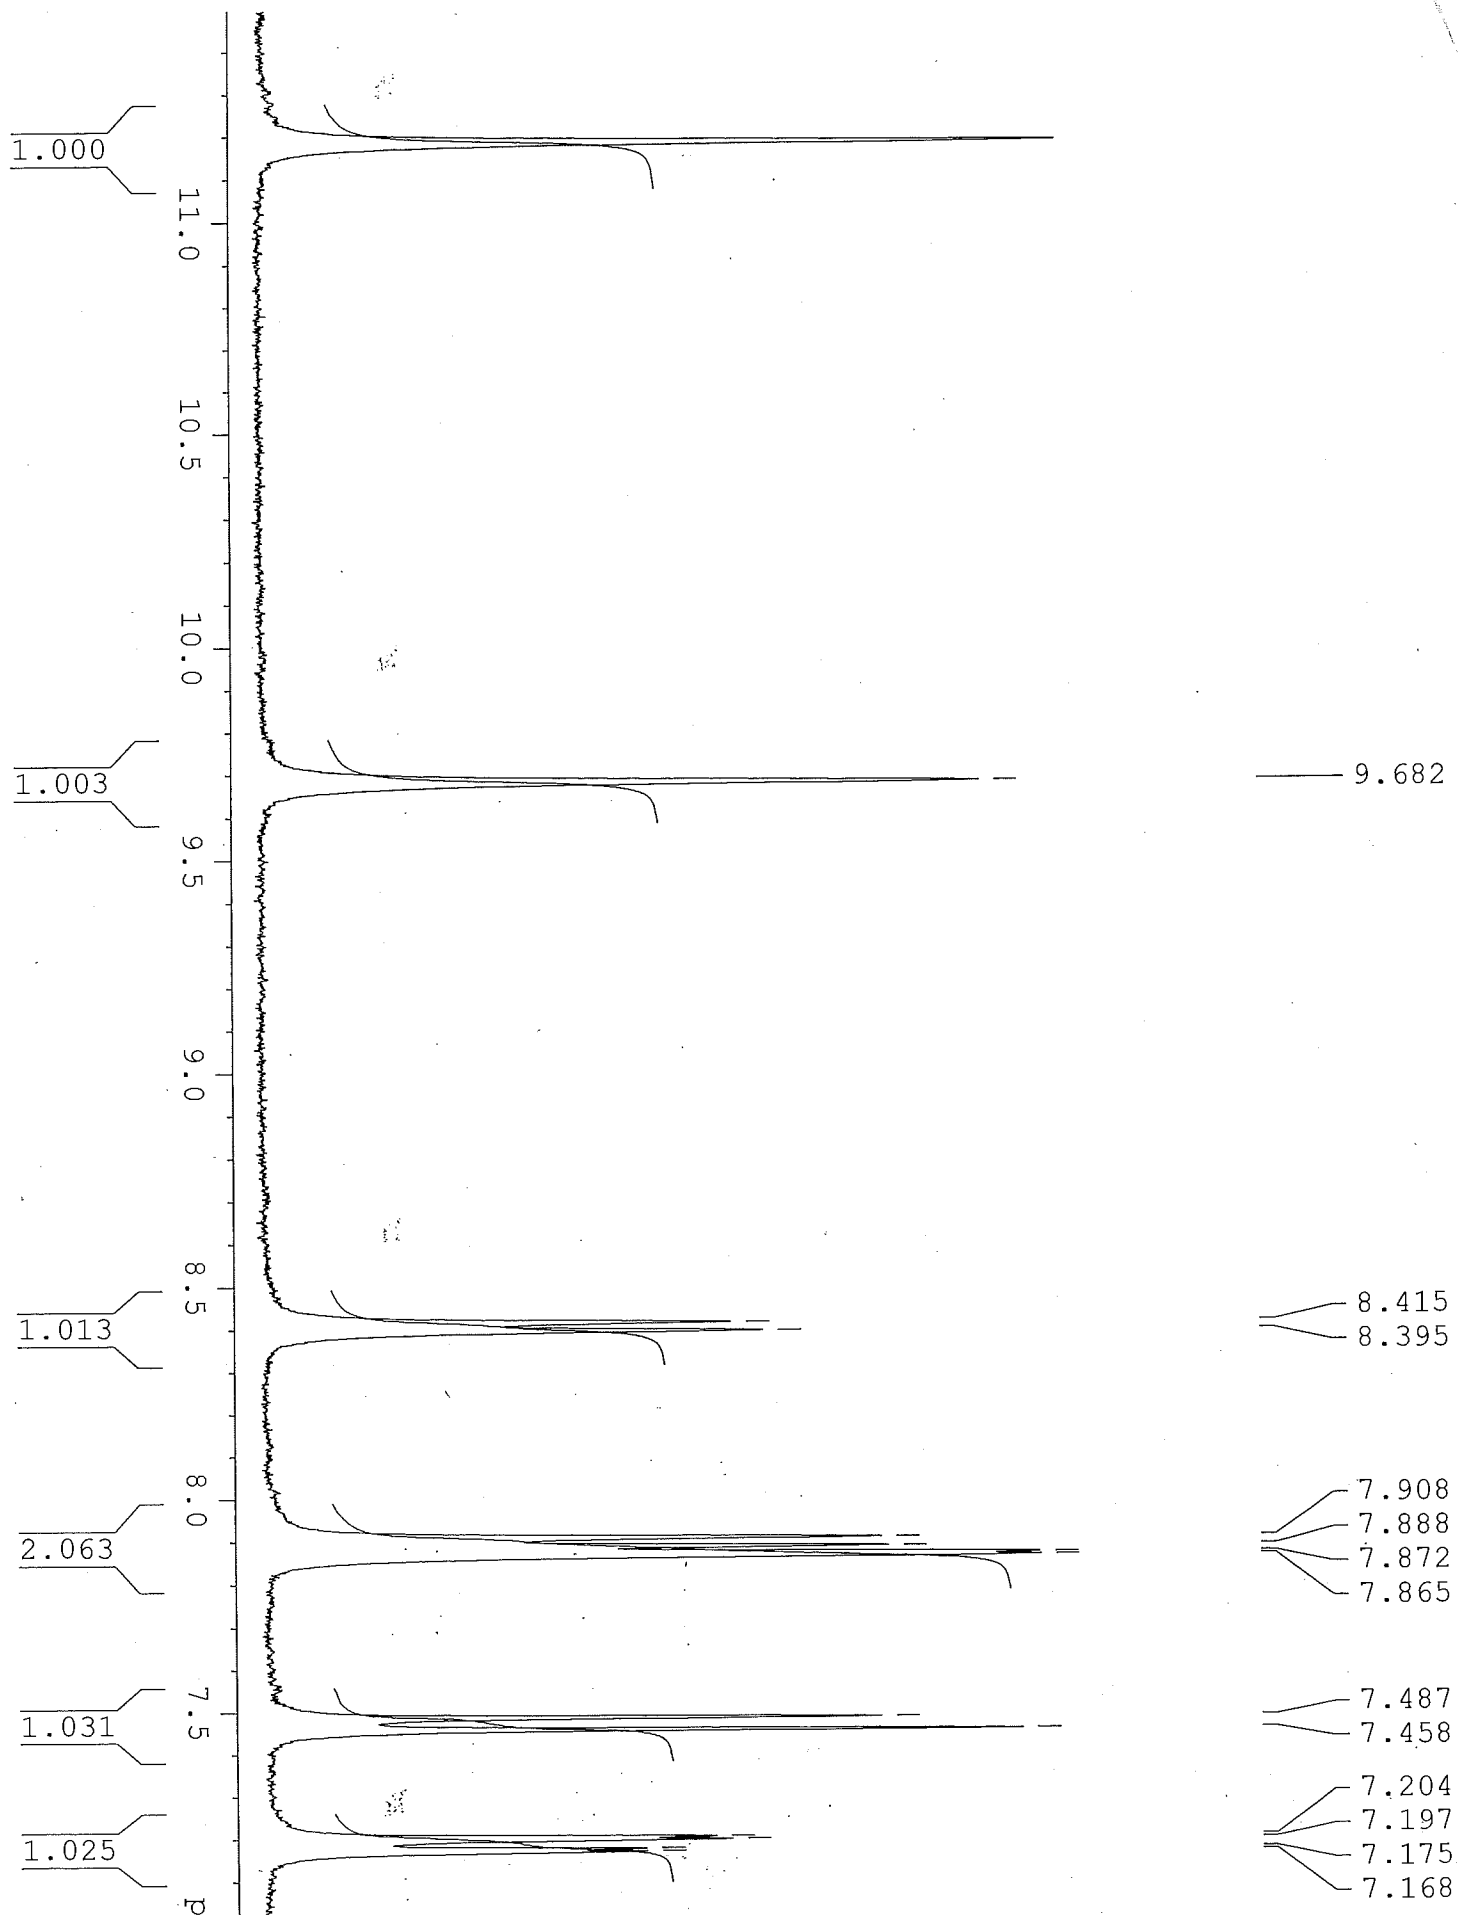

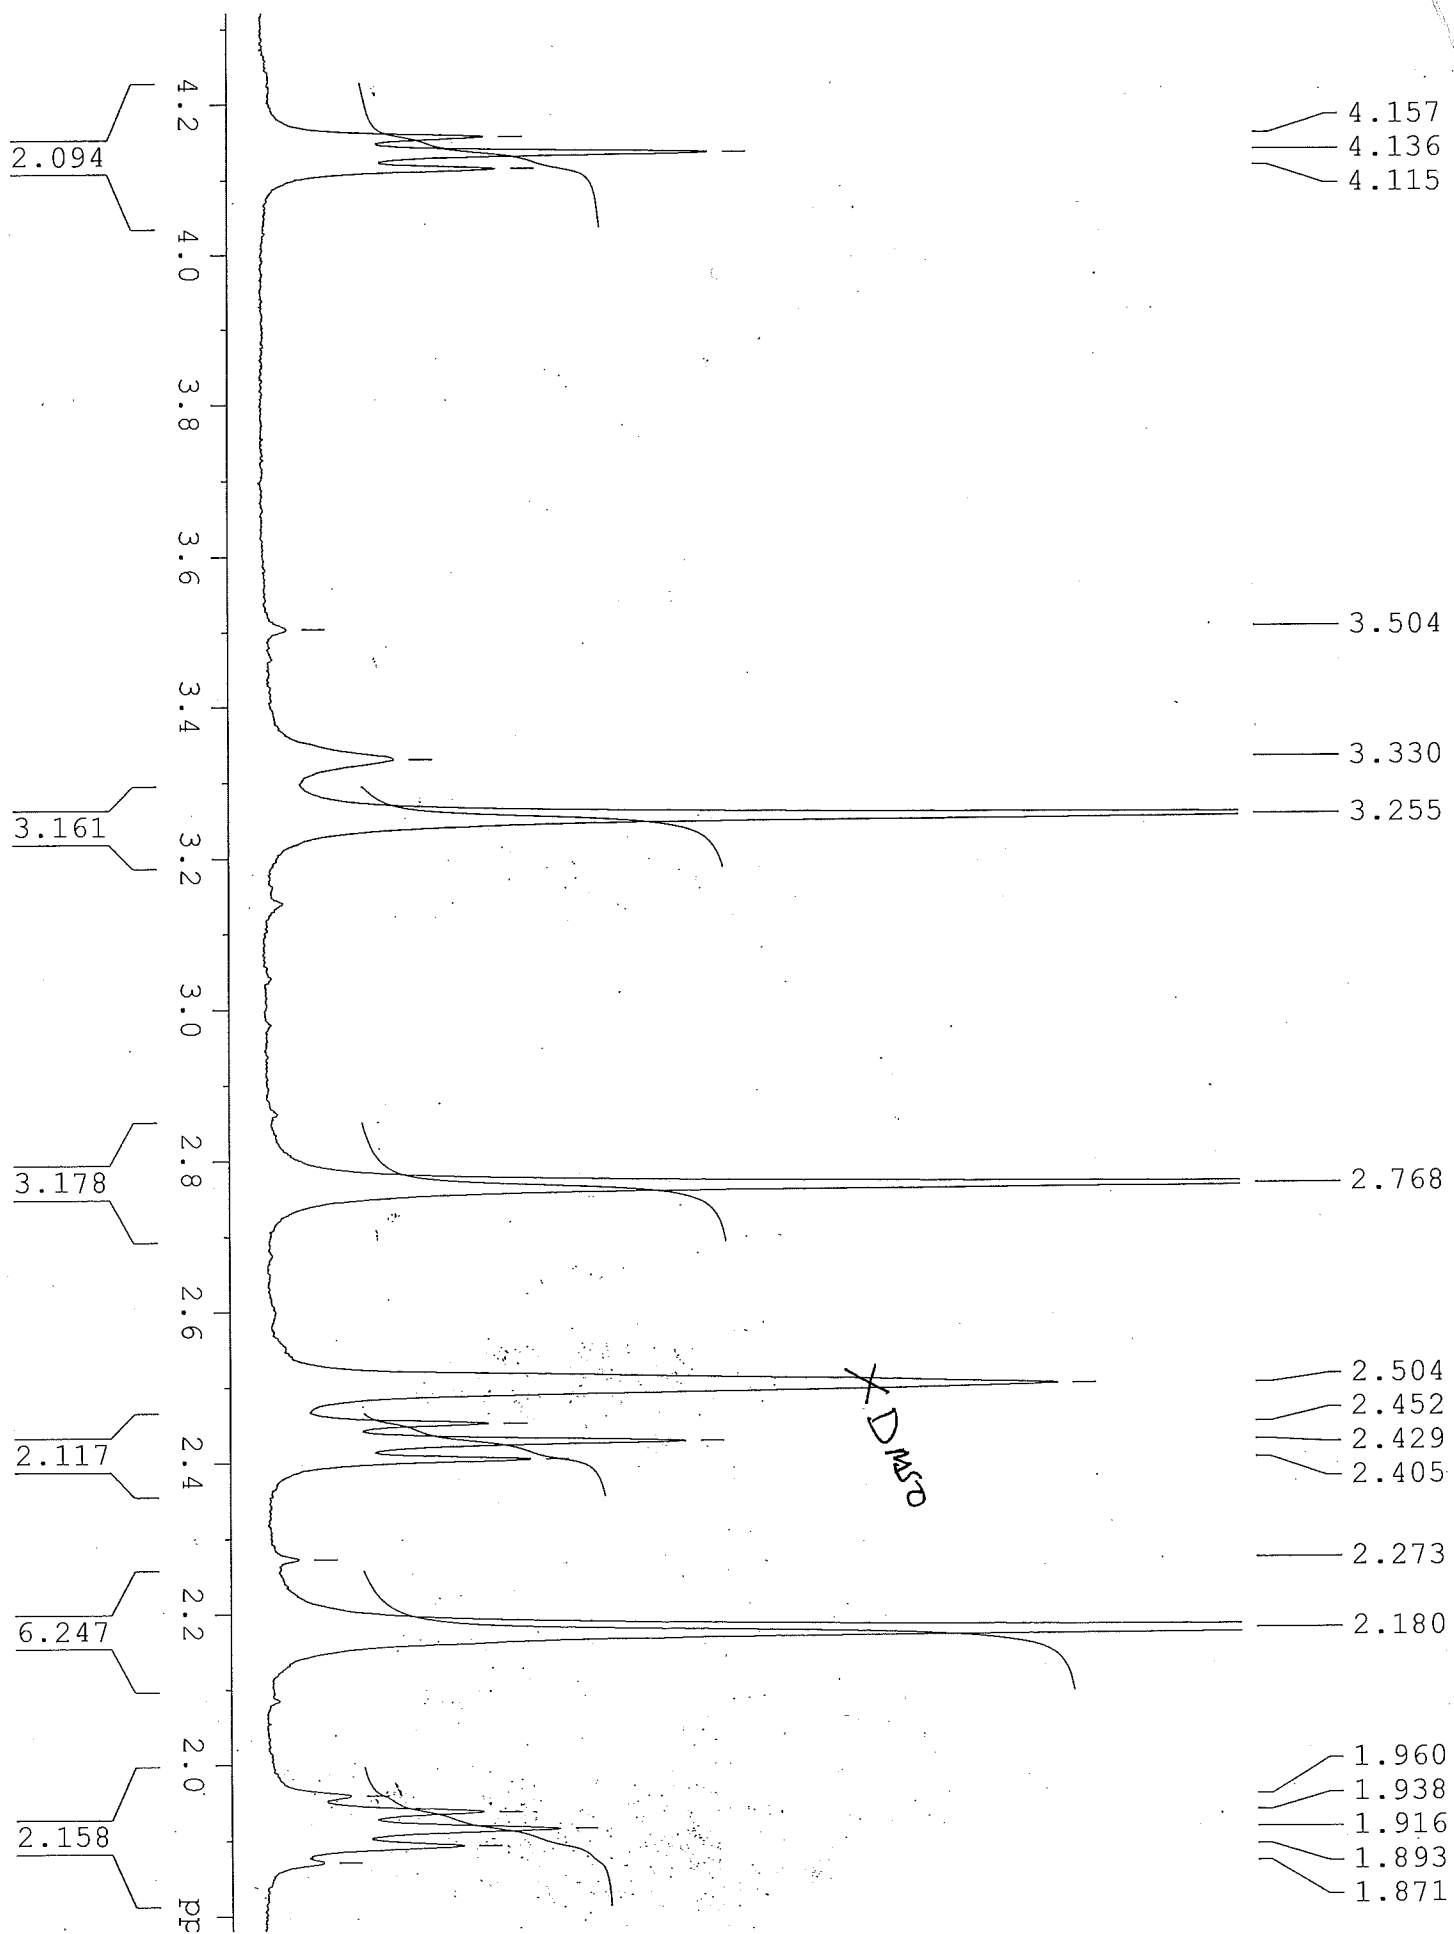

Current Data Parameters  
 NAME VB-GSA-0336-2  
 EXPNO 341  
 PROCNO 1

F2 - Acquisition Parameters  
 Date\_ 20110525  
 Time 7.50

INSTRUM spect  
 PROBD 5 mm QNP 1H/1  
 PULPROG zgpg30

TD 65536  
 SOLVENT DMSO-d<sub>6</sub>  
 NS 15000  
 DS 4

SWH 17985.611 Hz  
 FIDRES 0.274439 Hz  
 AQ 1.8219508 sec

RG 1824.6  
 DW 27.800 usec  
 DE 6.00 usec  
 TE 300.0 K

D1 2.00000000 sec  
 d11 0.03000000 sec  
 d12 0.0002000 sec

===== CHANNEL f1 =====  
 NUC1 13C  
 P1 6.00 usec  
 PL1 2.00 dB  
 SFO1 75.4752653 MHz

===== CHANNEL f2 =====  
 CPDPRG2 waltz16  
 NUC2 1H  
 PCPD2 80.00 usec  
 PL2 0.00 dB  
 PL12 19.47 dB  
 PL13 19.00 dB  
 SFO2 300.1312005 MHz

F2 - Processing parameters  
 SI 32768  
 SF 75.4677190 MHz  
 WDW EM  
 SSB 0  
 LB 1.00 Hz  
 GB 0  
 PC 1.00

153.320  
 150.616  
 142.079  
 141.282  
 138.199  
 133.194  
 129.065  
 124.439  
 124.273  
 122.548  
 116.642  
 111.983  
 109.649  
 108.738

67.630  
 56.740  
 46.145  
 41.222  
 40.944  
 40.666  
 40.388  
 40.109  
 39.831  
 39.552  
 39.227  
 38.946  
 28.096  
 15.152  
 12.774  
 0.969

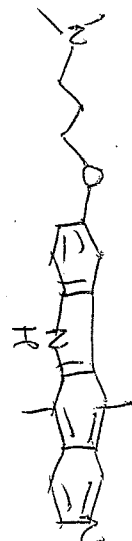

VB-GSA-0336

X DMSO

170 160 150 140 130 120 110 100 90 80 70 60 50 40 30 20 10 ppm

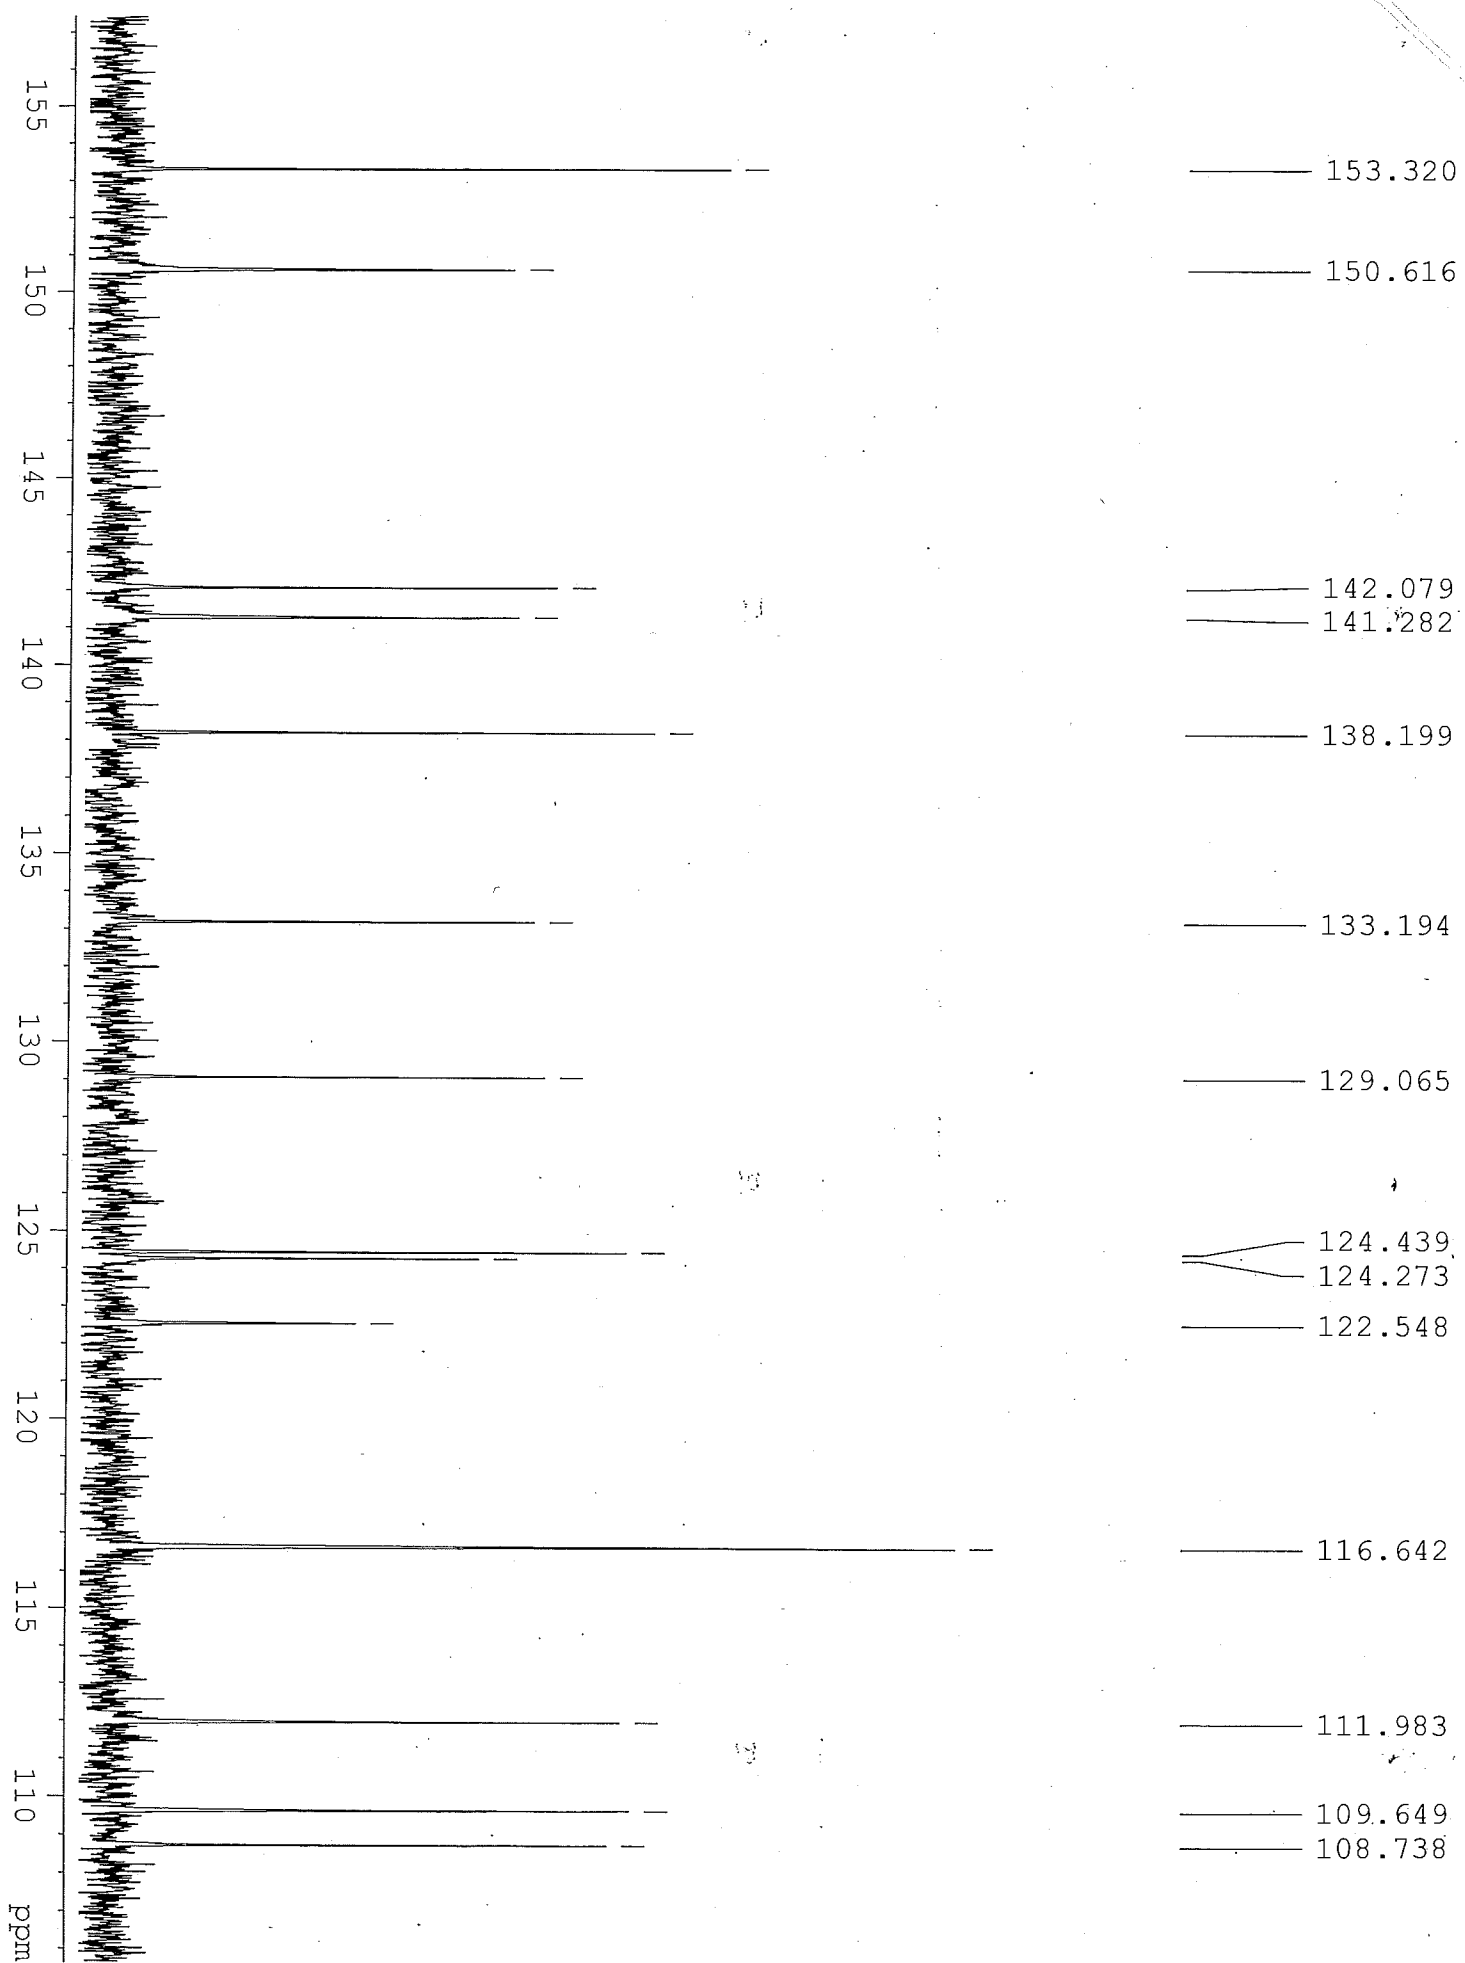

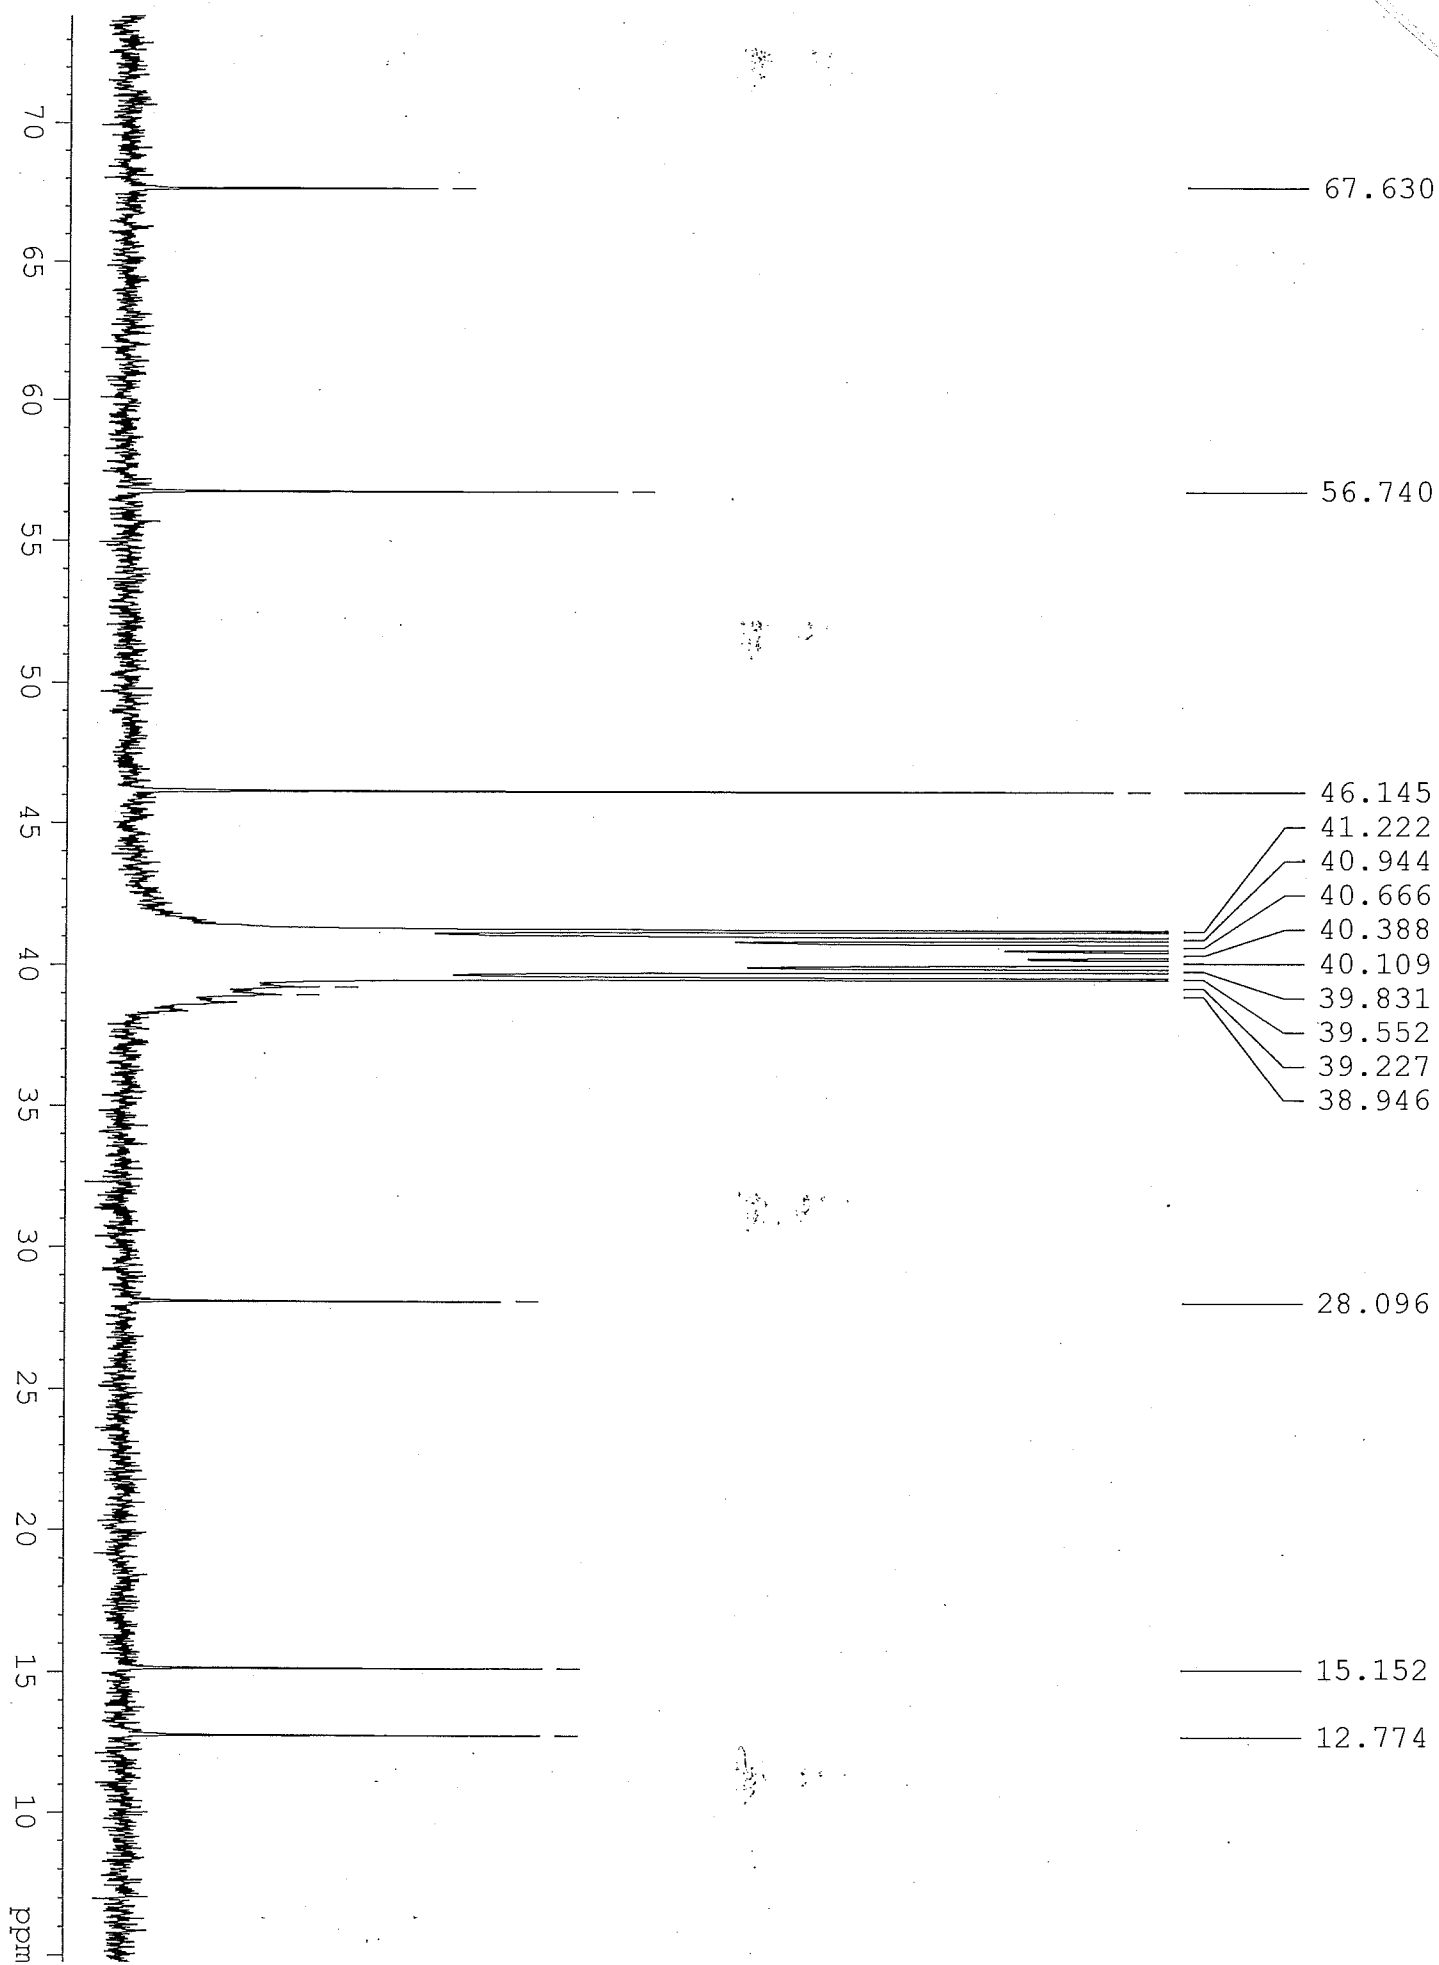

Injection Date : 5/23/2011 5:35:18 PM

Sample Name : VB-GSA-0336

Location : Vial 1

Acq. Operator : Karen

Inj : 1

Acq. Instrument : Instrument 1

Inj Volume : 0.1 µl

Method : C:\HPCHEM\1\METHODS\LC\_MS\_UV.M

Last changed : 5/23/2011 5:17:50 PM by Karen

Zorbax SB C18, 150 x 4.6, 3.5µ, 35/65/0.25, MeOH/water/formic, POS, 150-500; frag 70; 30C, cap  
volt 1500, gas temp 350; drying gas 10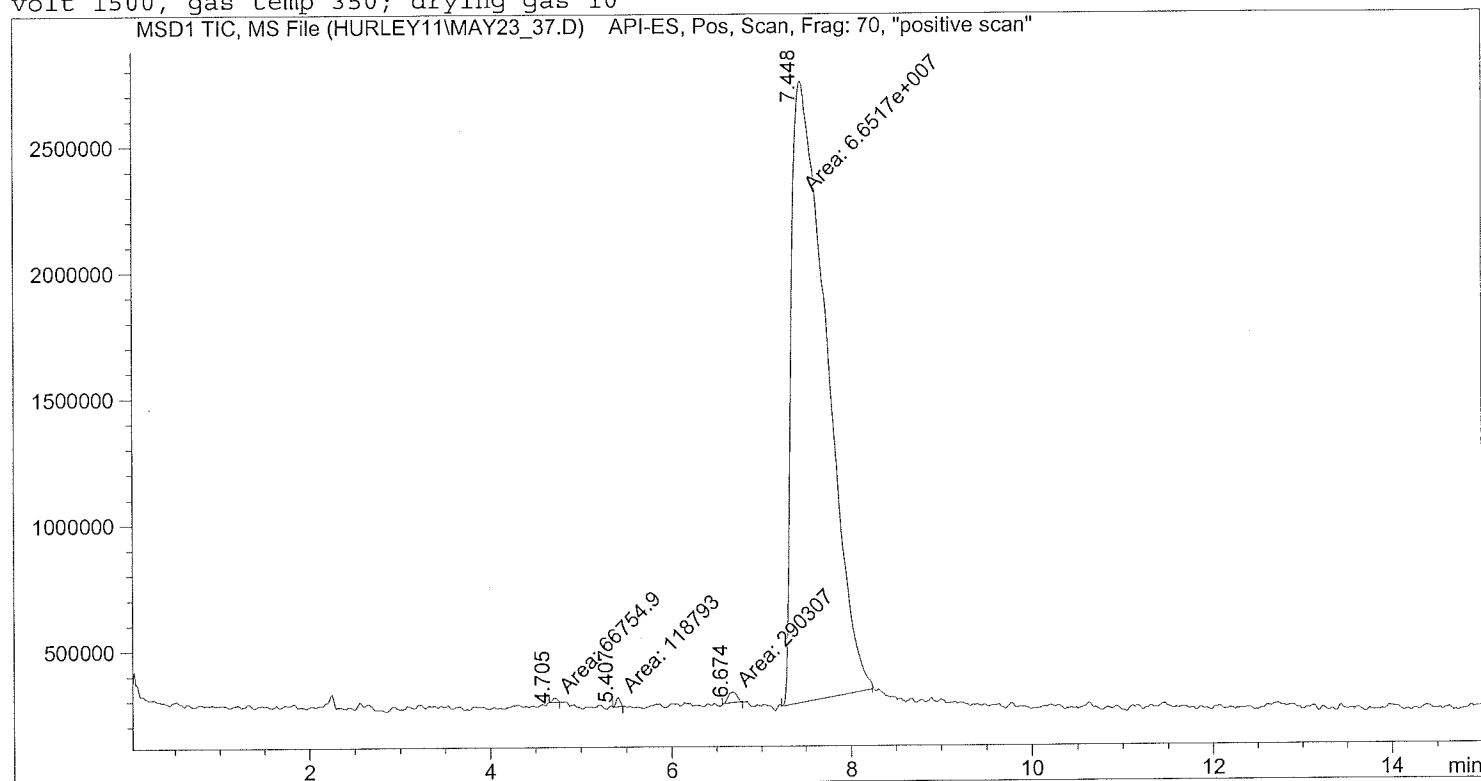

## Area Percent Report

Sorted By : Signal  
Multiplier : 1.0000  
Dilution : 1.0000  
Use Multiplier & Dilution Factor with ISTDs

Signal 1: MSD1 TIC, MS File

| Peak # | RetTime [min] | Type | Width [min] | Area      | Height    | Area %  |
|--------|---------------|------|-------------|-----------|-----------|---------|
| 1      | 4.705         | MM   | 0.0604      | 6.67549e4 | 1.84083e4 | 0.0996  |
| 2      | 5.407         | MM   | 0.0502      | 1.18793e5 | 3.94212e4 | 0.1773  |
| 3      | 6.674         | MM   | 0.1090      | 2.90307e5 | 4.43800e4 | 0.4333  |
| 4      | 7.448         | MM   | 0.4492      | 6.65170e7 | 2.46805e6 | 99.2897 |

Totals : 6.69928e7 2.57026e6

\*\*\* End of Report \*\*\*

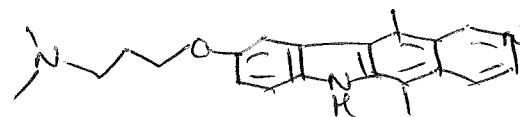

VB-GSA-0336

```
=====
Injection Date   : 5/23/2011 5:35:18 PM
Sample Name      : VB-GSA-0336
Acq. Operator    : Karen
Acq. Instrument  : Instrument 1
Method           : C:\HPCHEM\1\METHODS\LC_MS_UV.M
Last changed     : 5/23/2011 5:17:50 PM by Karen
Zorbax SB C18, 150 x 4.6, 3.5u, 35/65/0.25, MeOH/water/formic, POS, 150-500; frag 70; 30C, cap
volt 1500, gas temp 350; drying gas 10
=====
```

Current Chromatogram(s)

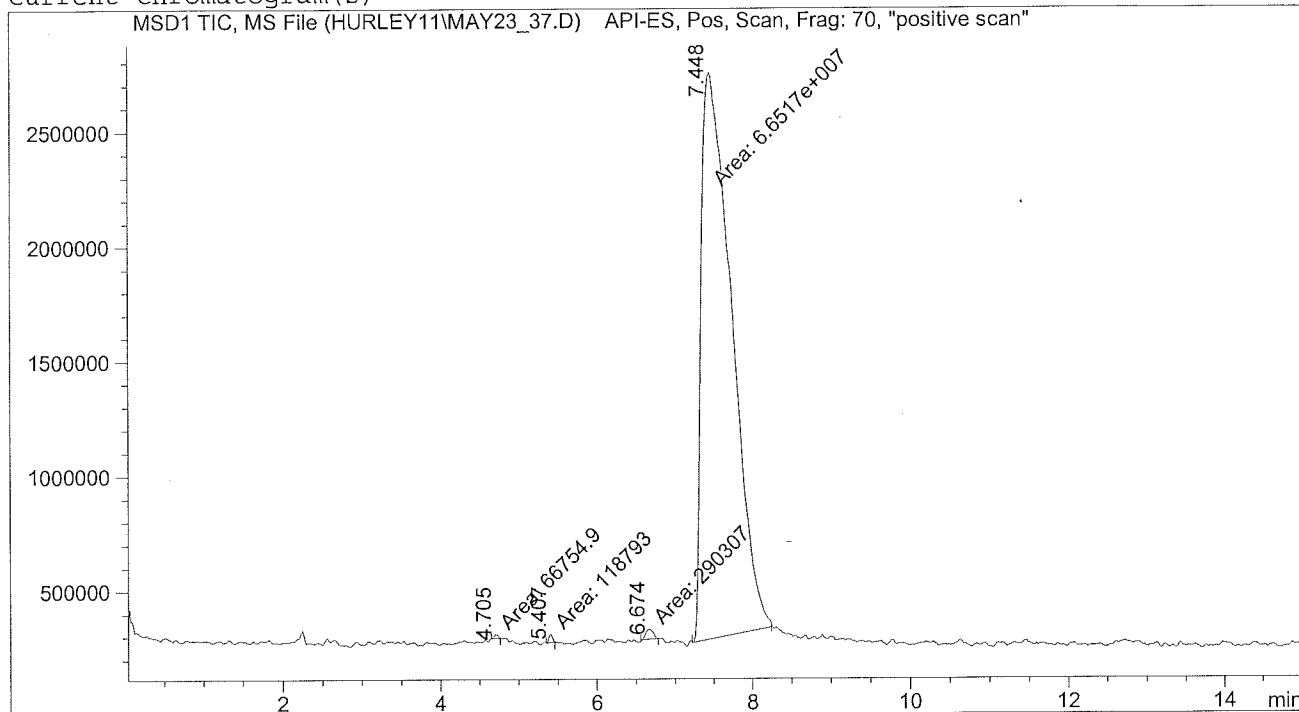

MS Spectrum

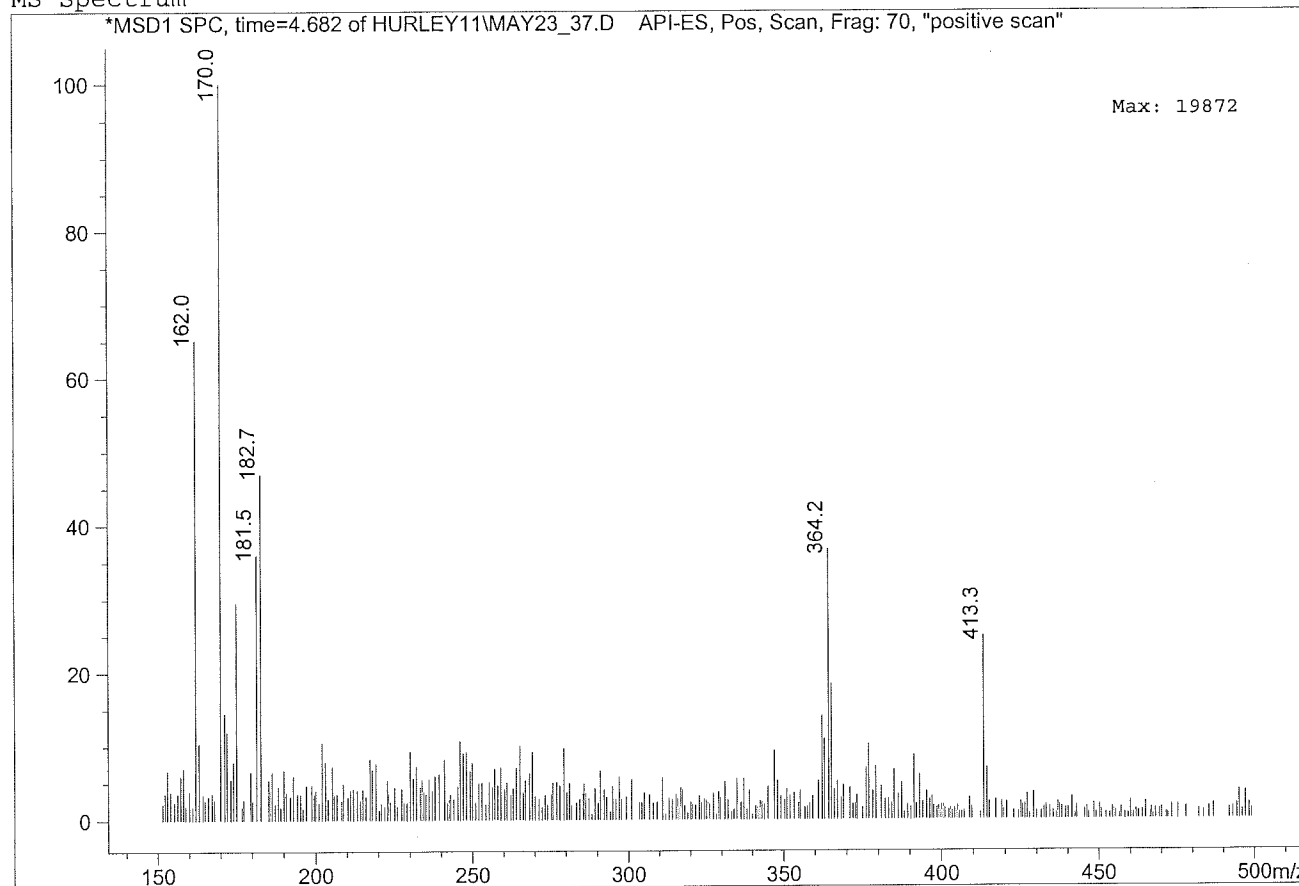

=====

|                 |                                  |            |               |
|-----------------|----------------------------------|------------|---------------|
| Injection Date  | : 5/23/2011 5:35:18 PM           | Location   | : Vial 1      |
| Sample Name     | : VB-GSA-0336                    | Inj        | : 1           |
| Acq. Operator   | : Karen                          | Inj Volume | : 0.1 $\mu$ l |
| Acq. Instrument | : Instrument 1                   |            |               |
| Method          | : C:\HPCHEM\1\METHODS\LC_MS_UV.M |            |               |
| Last changed    | : 5/23/2011 5:17:50 PM by Karen  |            |               |

Zorbax SB C18, 150 x 4.6, 3.5 $\mu$ , 35/65/0.25, MeOH/water/formic, POS, 150-500; frag 70; 30C, cap volt 1500, gas temp 350; drying gas 10

Current Chromatogram(s)

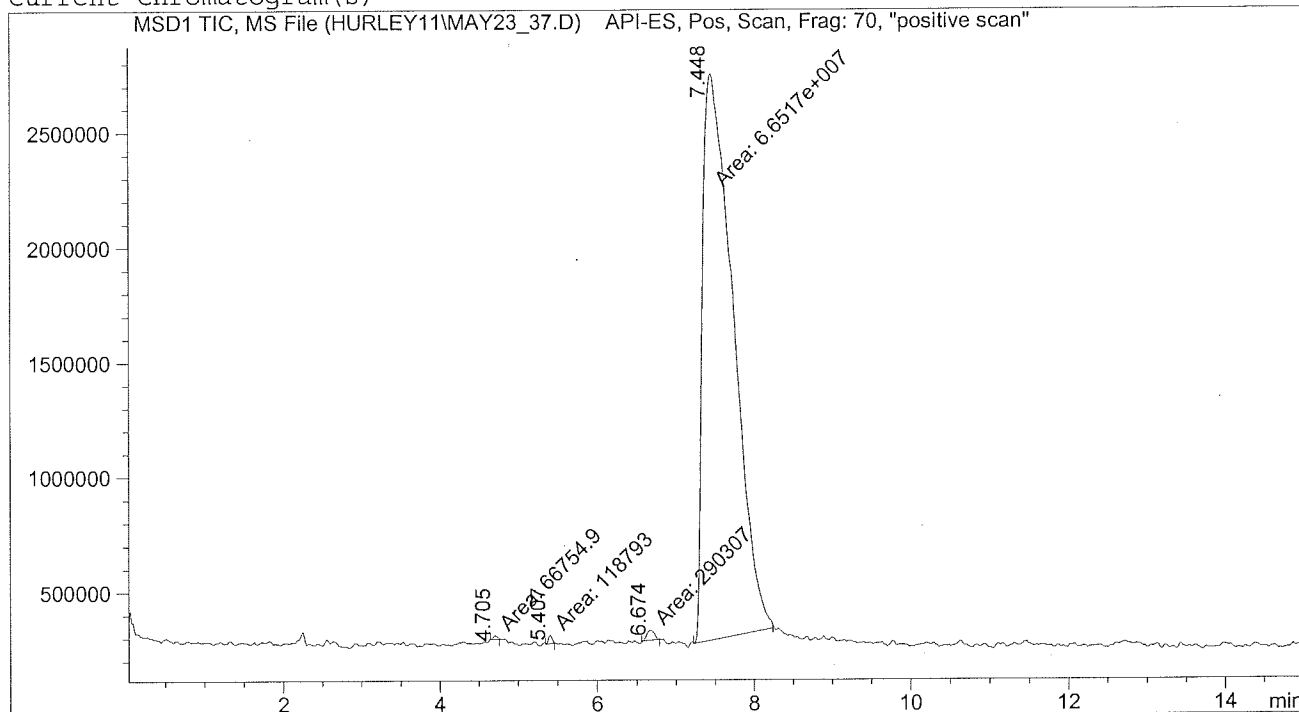

MS Spectrum

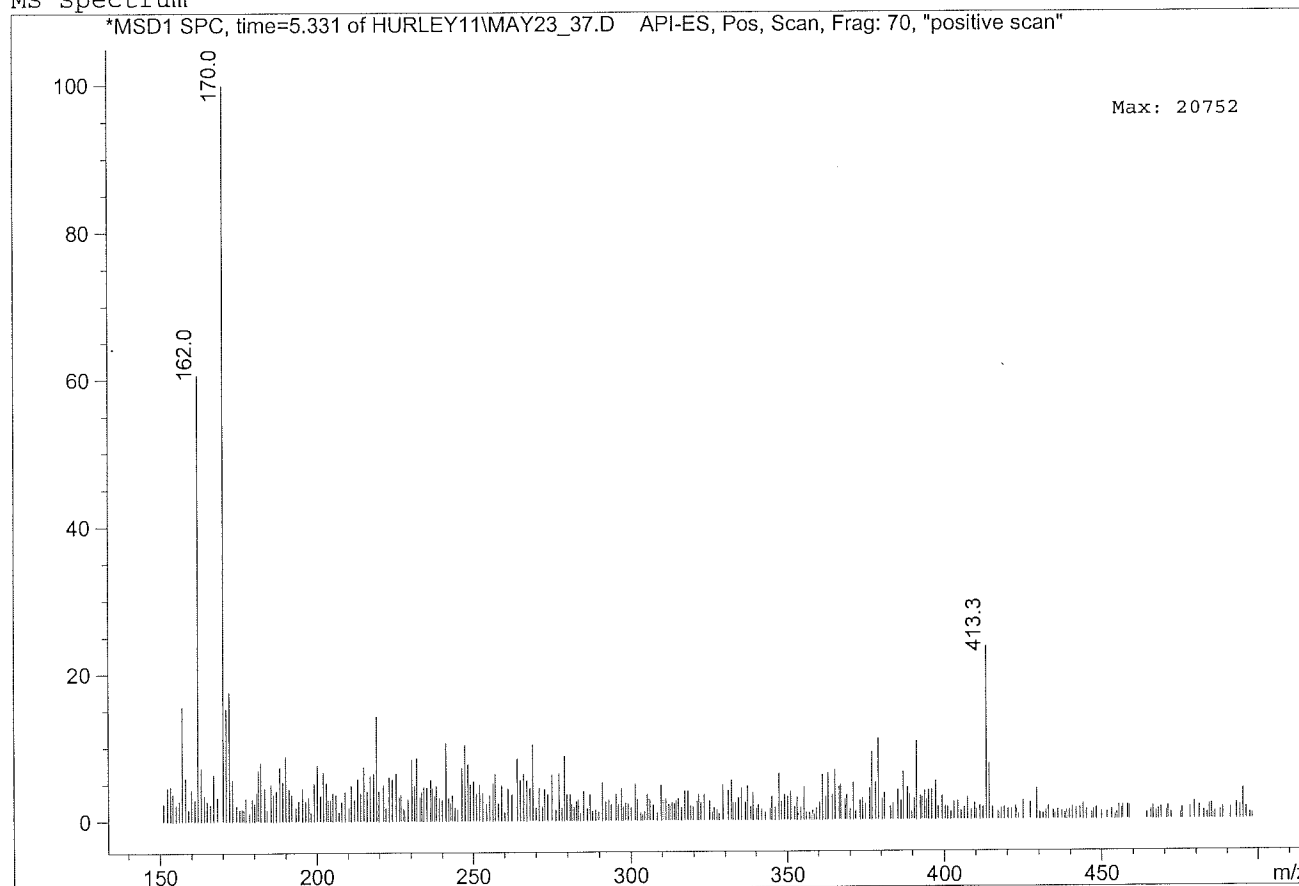



```
=====
Injection Date   : 5/23/2011 5:35:18 PM
Sample Name      : VB-GSA-0336
Acq. Operator    : Karen
Acq. Instrument  : Instrument 1
Method           : C:\HPCHEM\1\METHODS\LC_MS_UV.M
Last changed     : 5/23/2011 5:17:50 PM by Karen
Zorbax SB C18, 150 x 4.6, 3.5u, 35/65/0.25, MeOH/water/formic, POS, 150-500; frag 70; 30C,
cap volt 1500, gas temp 350; drying gas 10
=====
```

Current Chromatogram(s)

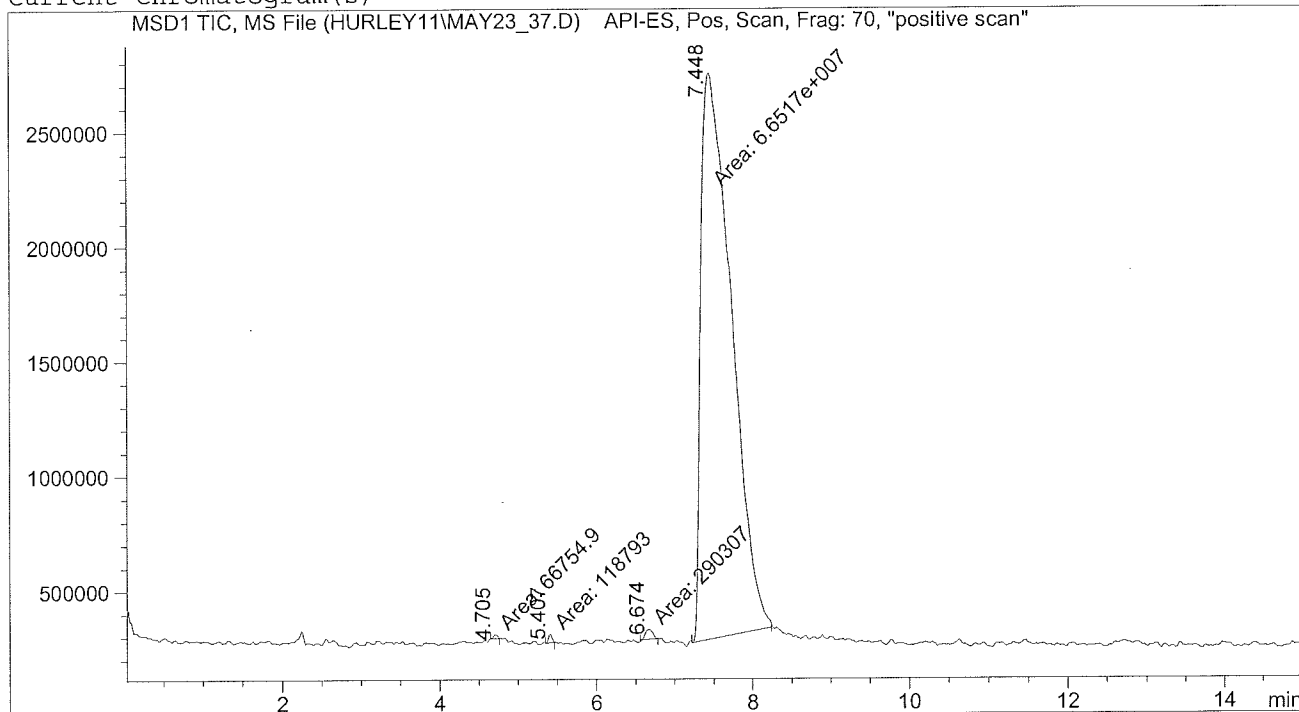

MS Spectrum

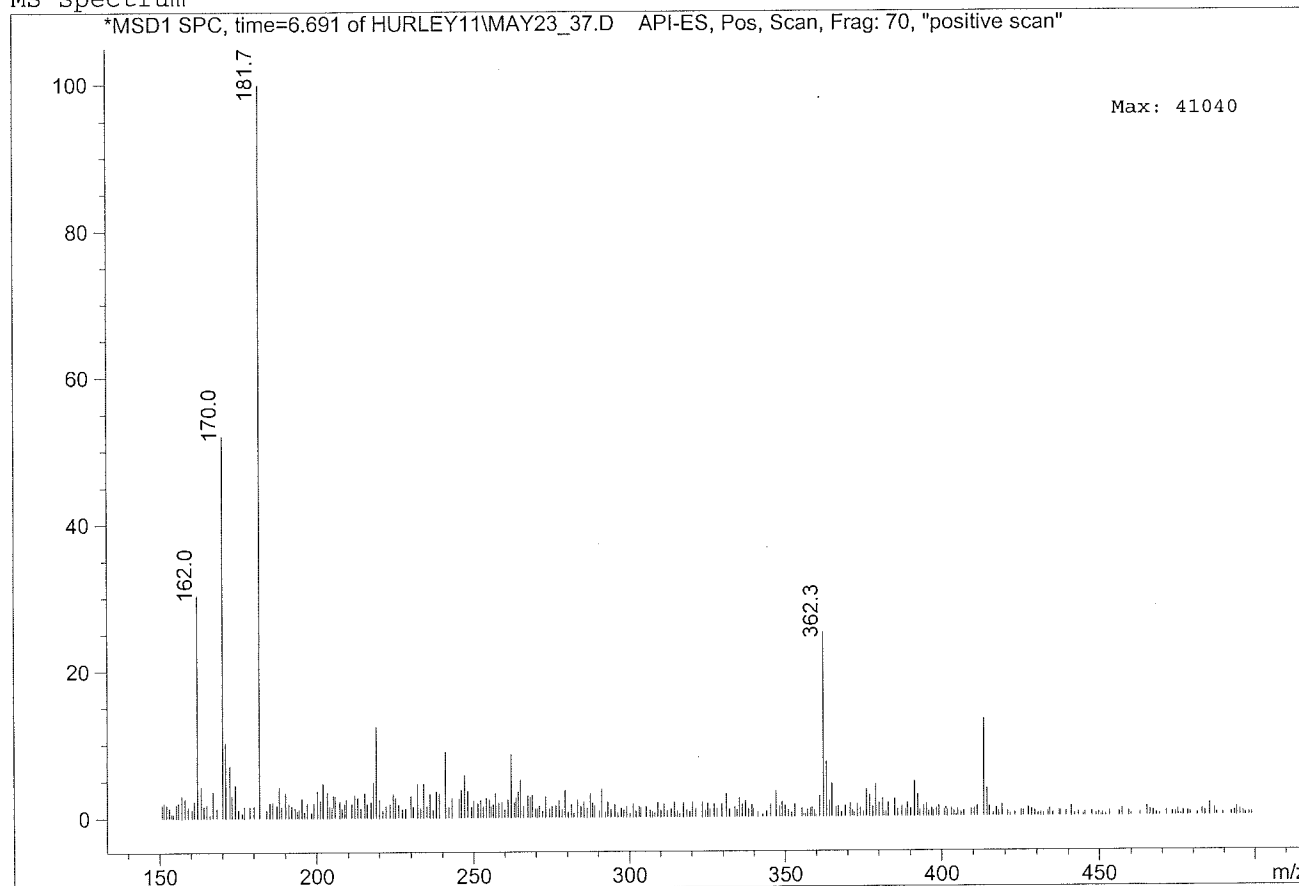

```
=====
Injection Date   : 5/23/2011 5:35:18 PM
Sample Name      : VB-GSA-0336
Acq. Operator    : Karen
Acq. Instrument  : Instrument 1
Method           : C:\HPCHEM\1\METHODS\LC_MS_UV.M
Last changed     : 5/23/2011 5:17:50 PM by Karen
Zorbax SB C18, 150 x 4.6, 3.5u,35/65/0.25,MeOH/water/formic, POS, 150-500; frag 70; 30C,
cap volt 1500, gas temp 350; drying gas 10
Location         : Vial 1
Inj              : 1
Inj Volume       : 0.1 µl
=====
```

Current Chromatogram(s)

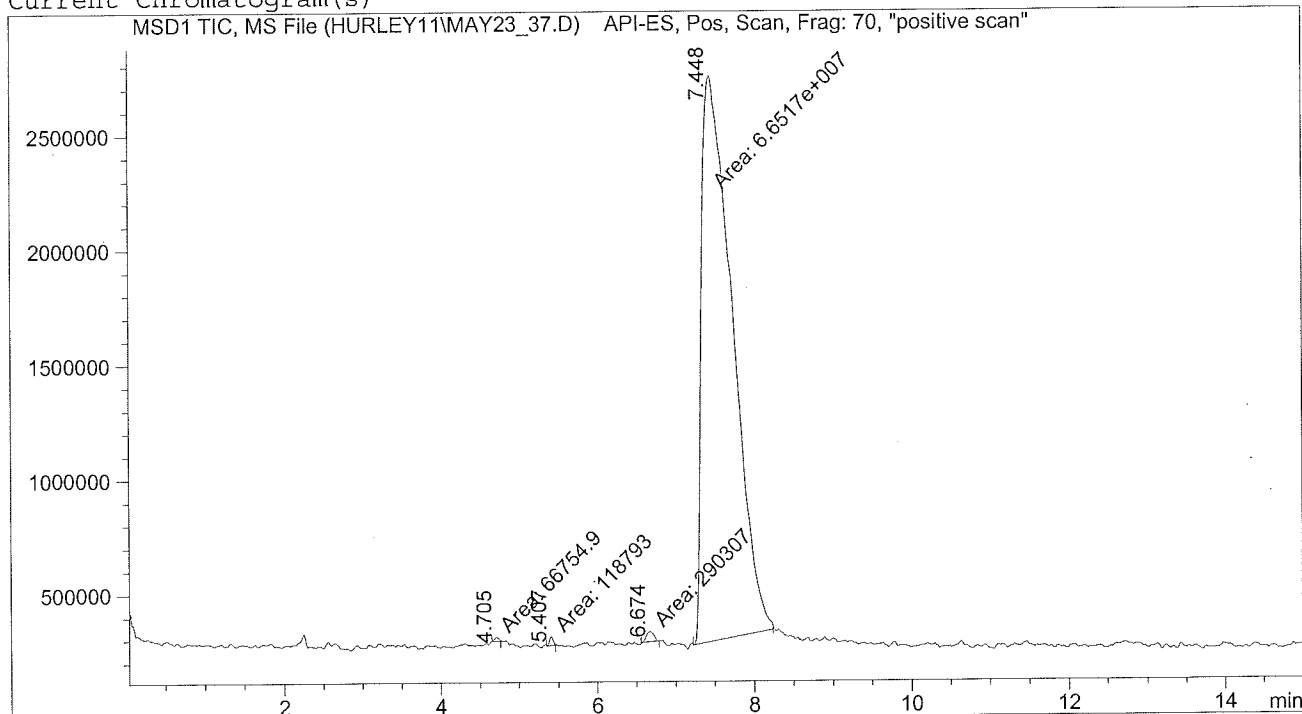

MS Spectrum

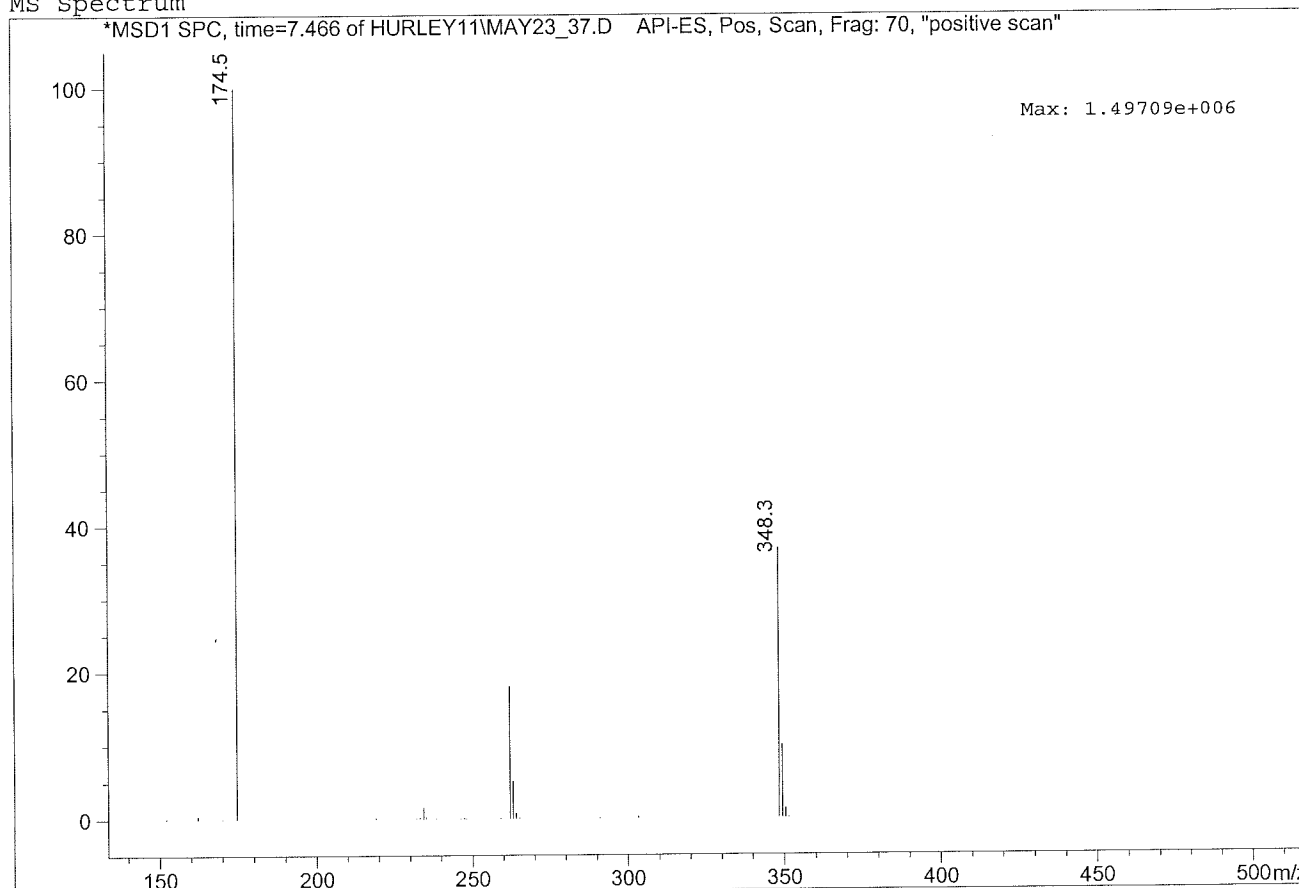

# Generic Display Report

## Analysis Info

Analysis Name D:\DATA\Facility\_May\_11\VB-0336\_000002.d  
Method Scott\_tune  
Sample Name VB-0336  
Comment Venkat B., ACN:H2O 1:1:0.1%FA

Acquisition Date

5/26/2011 9:36:01 AM

Operator  
Instrument

apex-Ultra

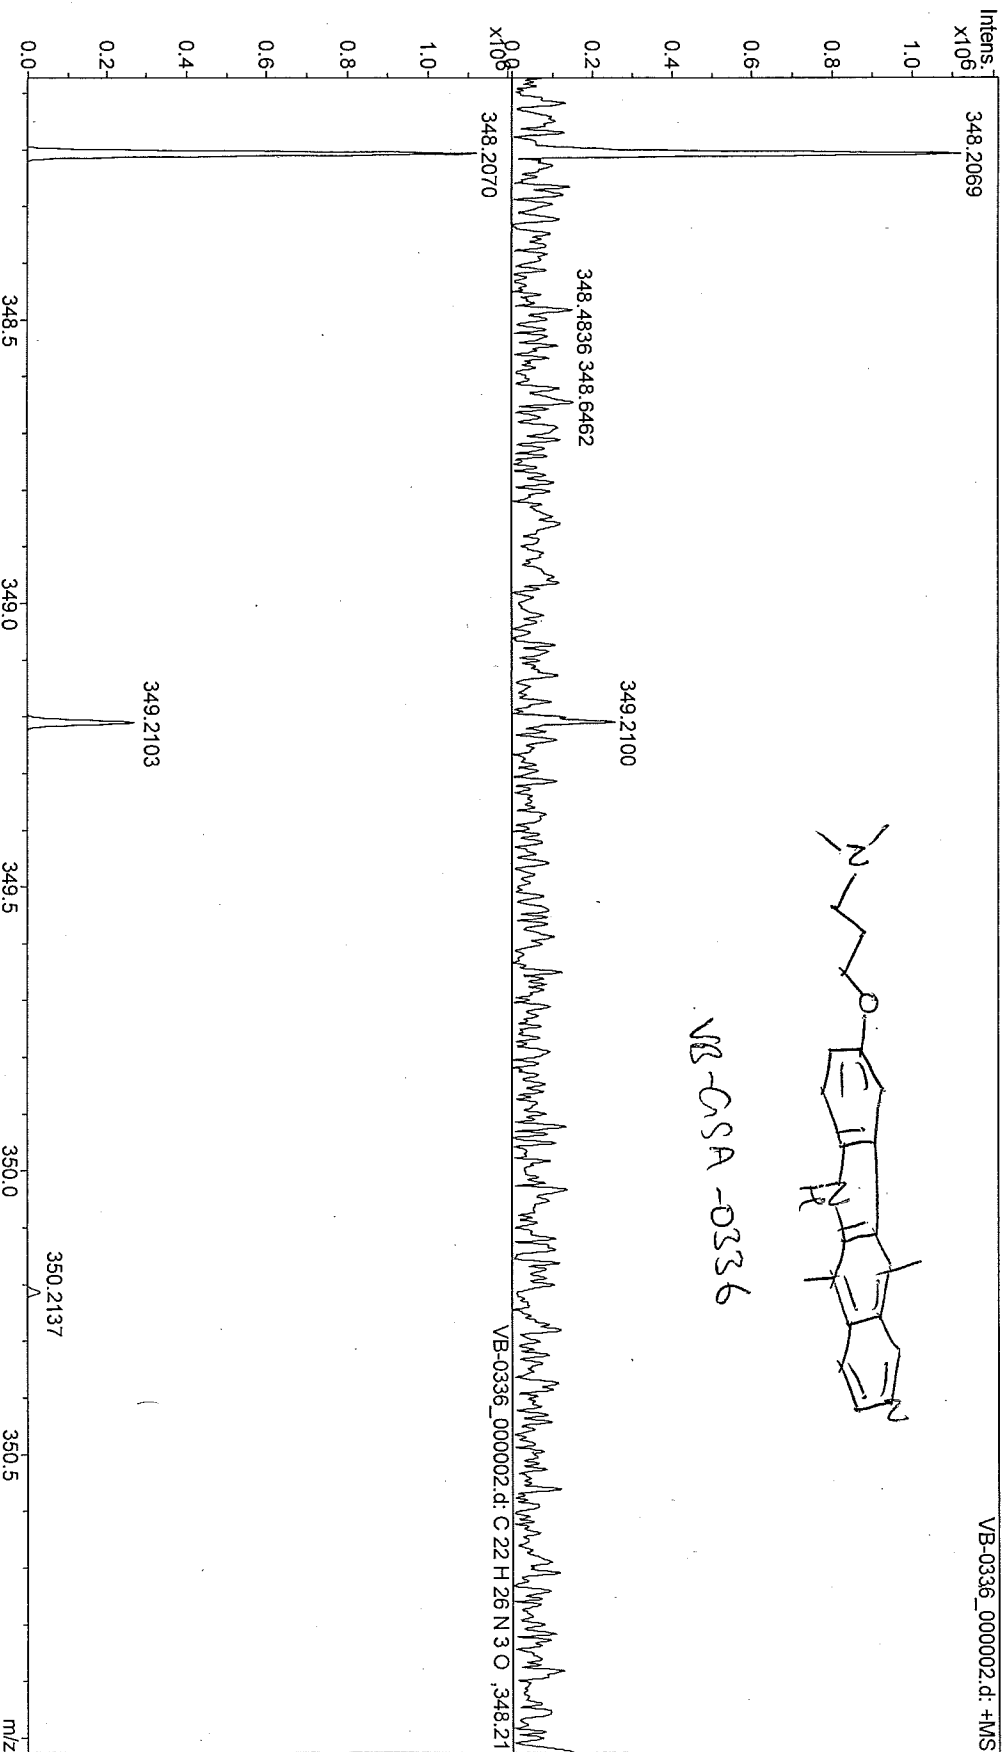

# SmartFormula Manually

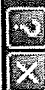

Min

C<sub>15</sub>

Generate

Max

C<sub>15</sub>-n

Help

Note: for  $m < 2000$  the elements C, H, N, and O are considered implicitly.

Measured  $m/z$

348.2069

Tolerance

2

mDa

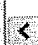

Charge

1

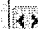

Meas.  $m/z$

#

Formula

Score

$m/z$

err [mDa]

err [ppm]

mSigma

rdB

e-Conf

N-Rule

ok

348.2069 1 C<sub>15</sub>H<sub>26</sub>N<sub>3</sub>O 100.00 348.2070 0.2 0.4 20.0 11.5 even

☐ Automatically locate monoisotopic peak

Maximum number of formulas

500

☒ Check rings plus double bonds

Minimum

-0.5

Maximum

40

Electron configuration

even

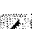

☒ Filter H/C element ratio

Minimum H/C

0

Maximum H/C

3

☒ Estimate carbon number

☒ Generate immediately

Show Pattern
